# Supplementary material for: Proteomic, Transcriptomic, Mutational, and Functional Assays Reveal the Involvement of Both THF and PLP Sites at the GmSHMT08 in Resistance to Soybean Cyst Nematode
Source: Int J Mol Sci. 2022 Sep 24;23(19):11278. doi: 10.3390/ijms231911278 (PMC9570156; doi:10.3390/ijms231911278)
Supplement: Supplementary file 1 [file ijms-23-11278-s001.zip › Meksem Supplemental Table S1.xlsx]

## Sheet: Forrest LC-MS SCN infected
MS/MS sample name	Protein name	Protein accession numbers	Database sources	Protein molecular weight (Da)	Protein identification probability	Number of unique peptides	Number of unique spectra	Number of total spectra	Percentage of total spectra	Percentage sequence coverage	Peptide sequence	Previous amino acid	Next amino acid	Best Peptide identification probability	Best SEQUEST XCorr score	Best SEQUEST DCn score	Number of identified +1H spectra	Number of identified +2H spectra	Number of identified +3H spectra	Number of identified +4H spectra	Number of enzymatic termini	Calculated +1H Peptide Mass (AMU)	Peptide start index	Peptide stop index	Assigned	Other Proteins
Protein 1	Serine hydroxymethyltransferase [Glycine max]	gi|296512839,gi|356552984	NCBI_Gmax.fasta	56158.5	1	27	40	47	0.0203	0.714	ALEAFQLDPAK	R	W	0.95	2.2	0.412	0	1	0	0	2	1202.64	119	129	TRUE
	Serine hydroxymethyltransferase [Glycine max]	gi|296512839,gi|356552984	NCBI_Gmax.fasta	56158.5	1	27	40	47	0.0203	0.714	AVLLADMAHISGLVAAGVIPSPFDYADVVTTTTHK	K	S	0.95	7.27	0.613	0	0	1	0	2	3580.87	242	276	TRUE	gi|356500779
	Serine hydroxymethyltransferase [Glycine max]	gi|296512839,gi|356552984	NCBI_Gmax.fasta	56158.5	1	27	40	47	0.0203	0.714	EVLYDYEDKINQAVFPGLQGGPHNHTISGLAVALK	K	Q	0.95	5.59	0.572	0	0	1	1	2	3793.96	301	335	TRUE
	Serine hydroxymethyltransferase [Glycine max]	gi|296512839,gi|356552984	NCBI_Gmax.fasta	56158.5	1	27	40	47	0.0203	0.714	GFELIPSENFTSLSVMQAVGSVMTNK	K	Y	0.95	4.91	0.738	0	2	1	0	2	2786.37	66	91	TRUE	gi|356500779
	Serine hydroxymethyltransferase [Glycine max]	gi|296512839,gi|356552984	NCBI_Gmax.fasta	56158.5	1	27	40	47	0.0203	0.714	GFVEEDFEKVAEYFDAAVK	R	L	0.95	5.56	0.667	0	1	1	0	2	2193.04	430	448	TRUE	gi|356500779
	Serine hydroxymethyltransferase [Glycine max]	gi|296512839,gi|356552984	NCBI_Gmax.fasta	56158.5	1	27	40	47	0.0203	0.714	GYELVSGGTDNHLVLVNLR	K	N	0.95	6.42	0.623	0	1	1	0	2	2056.08	364	382	TRUE	gi|356500779
	Serine hydroxymethyltransferase [Glycine max]	gi|296512839,gi|356552984	NCBI_Gmax.fasta	56158.5	1	27	40	47	0.0203	0.714	IANLCHEVEDYAK	K	K	0.95	3.8	0.474	0	1	1	0	2	1561.73	479	491	TRUE
	Serine hydroxymethyltransferase [Glycine max]	gi|296512839,gi|356552984	NCBI_Gmax.fasta	56158.5	1	27	40	47	0.0203	0.714	IMALDLPHGGHLSHGYQTDTK	R	K	0.95	3.41	0.478	0	1	1	0	2	2291.12	157	177	TRUE	gi|356500779
	Serine hydroxymethyltransferase [Glycine max]	gi|296512839,gi|356552984	NCBI_Gmax.fasta	56158.5	1	27	40	47	0.0203	0.714	IMALDLPHGGHLSHGYQTDTKK	R	I	0.95	2.99	0.401	0	1	2	1	2	2435.21	157	178	TRUE	gi|356500779
	Serine hydroxymethyltransferase [Glycine max]	gi|296512839,gi|356552984	NCBI_Gmax.fasta	56158.5	1	27	40	47	0.0203	0.714	INQAVFPGLQGGPHNHTISGLAVALK	K	Q	0.95	3.3	0.587	0	1	1	0	2	2639.44	310	335	TRUE	gi|356500779
	Serine hydroxymethyltransferase [Glycine max]	gi|296512839,gi|356552984	NCBI_Gmax.fasta	56158.5	1	27	40	47	0.0203	0.714	ISAVSIFFETMPYR	K	L	0.95	3.08	0.574	0	2	0	0	2	1660.84	179	192	TRUE	gi|356500779
	Serine hydroxymethyltransferase [Glycine max]	gi|296512839,gi|356552984	NCBI_Gmax.fasta	56158.5	1	27	40	47	0.0203	0.714	KFPTIGFNIETMK	K	Y	0.95	3.16	0.384	0	2	0	0	2	1525.81	492	504	TRUE
	Serine hydroxymethyltransferase [Glycine max]	gi|296512839,gi|356552984	NCBI_Gmax.fasta	56158.5	1	27	40	47	0.0203	0.714	KFPTIGFNIETMKYGK	K	-	0.95	1.99	0.281	0	0	1	0	2	1889.98	492	507	TRUE
	Serine hydroxymethyltransferase [Glycine max]	gi|296512839,gi|356552984	NCBI_Gmax.fasta	56158.5	1	27	40	47	0.0203	0.714	KISAVSIFFETMPYR	K	L	0.95	5.05	0.599	0	2	0	0	2	1788.94	178	192	TRUE	gi|356500779
	Serine hydroxymethyltransferase [Glycine max]	gi|296512839,gi|356552984	NCBI_Gmax.fasta	56158.5	1	27	40	47	0.0203	0.714	LIVAGASAYAR	K	L	0.95	3.45	0.518	0	1	0	0	2	1091.62	216	226	TRUE	gi|356500779
	Serine hydroxymethyltransferase [Glycine max]	gi|296512839,gi|356552984	NCBI_Gmax.fasta	56158.5	1	27	40	47	0.0203	0.714	LKDFVAAMQSDEQIQSK	K	I	0.95	4.12	0.468	0	1	1	0	2	1937.96	462	478	TRUE
	Serine hydroxymethyltransferase [Glycine max]	gi|296512839,gi|356552984	NCBI_Gmax.fasta	56158.5	1	27	40	47	0.0203	0.714	LNESTGYIDYDQLEK	R	S	0.95	5.13	0.605	0	1	0	0	2	1787.83	193	207	TRUE	gi|356500779
	Serine hydroxymethyltransferase [Glycine max]	gi|296512839,gi|356552984	NCBI_Gmax.fasta	56158.5	1	27	40	47	0.0203	0.714	NTVPGDVSAMVPGGIR	K	M	0.95	2.12	0.476	0	1	0	0	2	1585.8	405	420	TRUE	gi|356500779
	Serine hydroxymethyltransferase [Glycine max]	gi|296512839,gi|356552984	NCBI_Gmax.fasta	56158.5	1	27	40	47	0.0203	0.714	QLNDPLEAIDPEIADIIELEK	K	A	0.95	4.29	0.563	0	1	0	0	2	2378.23	40	60	TRUE
	Serine hydroxymethyltransferase [Glycine max]	gi|296512839,gi|356552984	NCBI_Gmax.fasta	56158.5	1	27	40	47	0.0203	0.714	QVLSNCSAFAQSLLEK	K	G	0.95	3.56	0.526	0	1	0	0	2	1794.91	348	363	TRUE	gi|356500779
	Serine hydroxymethyltransferase [Glycine max]	gi|296512839,gi|356552984	NCBI_Gmax.fasta	56158.5	1	27	40	47	0.0203	0.714	RALEAFQLDPAK	K	W	0.95	2.69	0.388	0	1	0	0	2	1358.74	118	129	TRUE
	Serine hydroxymethyltransferase [Glycine max]	gi|296512839,gi|356552984	NCBI_Gmax.fasta	56158.5	1	27	40	47	0.0203	0.714	VAEYFDAAVK	K	L	0.95	2.52	0.503	0	1	0	0	2	1112.56	439	448	TRUE	gi|356500779
	Serine hydroxymethyltransferase [Glycine max]	gi|296512839,gi|356552984	NCBI_Gmax.fasta	56158.5	1	27	40	47	0.0203	0.714	VLEAVHIAANK	K	N	0.95	3	0.624	0	1	0	0	2	1164.67	394	404	TRUE	gi|356500779
	Serine hydroxymethyltransferase [Glycine max]	gi|296512839,gi|356552984	NCBI_Gmax.fasta	56158.5	1	27	40	47	0.0203	0.714	VLEAVHIAANKNTVPGDVSAMVPGGIR	K	M	0.95	4.73	0.586	0	0	2	0	2	2715.46	394	420	TRUE	gi|356500779
	Serine hydroxymethyltransferase [Glycine max]	gi|296512839,gi|356552984	NCBI_Gmax.fasta	56158.5	1	27	40	47	0.0203	0.714	WGVNVQSLSGSPSNFQVYTALLKPHER	K	I	0.95	5	0.582	0	1	1	1	2	3014.55	130	156	TRUE	gi|356500779
	Serine hydroxymethyltransferase [Glycine max]	gi|296512839,gi|356552984	NCBI_Gmax.fasta	56158.5	1	27	40	47	0.0203	0.714	YYGGNEYIDMAETLCQK	R	R	0.95	5.46	0.684	0	2	0	0	2	2054.88	101	117	TRUE	gi|356500779
	Serine hydroxymethyltransferase [Glycine max]	gi|296512839,gi|356552984	NCBI_Gmax.fasta	56158.5	1	27	40	47	0.0203	0.714	YYGGNEYIDMAETLCQKR	R	A	0.95	4.27	0.695	0	1	1	0	2	2210.98	101	118	TRUE	gi|356500779
Protein 2	Serine hydroxymethyltransferase, mitochondrial [Glycine max]	gi|356500779	NCBI_Gmax.fasta	56943.4	1	6	8	8	0.00345	0.698	ALEAFRLDPAK	R	W	0.95	2.47	0.242	0	1	0	0	2	1230.68	126	136	TRUE
	Serine hydroxymethyltransferase, mitochondrial [Glycine max]	gi|356500779	NCBI_Gmax.fasta	56943.4	1	6	8	8	0.00345	0.698	AVLLADMAHISGLVAAGVIPSPFDYADVVTTTTHK	K	S	0.95	7.27	0.613	0	0	1	0	2	3580.87	249	283	FALSE	gi|356552984,gi|296512839
	Serine hydroxymethyltransferase, mitochondrial [Glycine max]	gi|356500779	NCBI_Gmax.fasta	56943.4	1	6	8	8	0.00345	0.698	EVLYDYEDRINQAVFPGLQGGPHNHTISGLAVALK	K	Q	0.95	5.63	0.555	0	0	1	1	2	3821.96	308	342	TRUE
	Serine hydroxymethyltransferase, mitochondrial [Glycine max]	gi|356500779	NCBI_Gmax.fasta	56943.4	1	6	8	8	0.00345	0.698	GFELIPSENFTSLSVMQAVGSVMTNK	K	Y	0.95	4.91	0.738	0	2	1	0	2	2786.37	73	98	FALSE	gi|356552984,gi|296512839
	Serine hydroxymethyltransferase, mitochondrial [Glycine max]	gi|356500779	NCBI_Gmax.fasta	56943.4	1	6	8	8	0.00345	0.698	GFVEEDFEKVAEYFDAAVK	R	L	0.95	5.56	0.667	0	1	1	0	2	2193.04	437	455	FALSE	gi|356552984,gi|296512839
	Serine hydroxymethyltransferase, mitochondrial [Glycine max]	gi|356500779	NCBI_Gmax.fasta	56943.4	1	6	8	8	0.00345	0.698	GYELVSGGTDNHLVLVNLR	K	N	0.95	6.42	0.623	0	1	1	0	2	2056.08	371	389	FALSE	gi|356552984,gi|296512839
	Serine hydroxymethyltransferase, mitochondrial [Glycine max]	gi|356500779	NCBI_Gmax.fasta	56943.4	1	6	8	8	0.00345	0.698	IANLRHEVEDYAK	K	Q	0.95	3.48	0.396	0	1	0	0	2	1557.8	486	498	TRUE
	Serine hydroxymethyltransferase, mitochondrial [Glycine max]	gi|356500779	NCBI_Gmax.fasta	56943.4	1	6	8	8	0.00345	0.698	IMALDLPHGGHLSHGYQTDTK	R	K	0.95	3.41	0.478	0	1	1	0	2	2291.12	164	184	FALSE	gi|356552984,gi|296512839
	Serine hydroxymethyltransferase, mitochondrial [Glycine max]	gi|356500779	NCBI_Gmax.fasta	56943.4	1	6	8	8	0.00345	0.698	IMALDLPHGGHLSHGYQTDTKK	R	I	0.95	2.99	0.401	0	1	2	1	2	2435.21	164	185	FALSE	gi|356552984,gi|296512839
	Serine hydroxymethyltransferase, mitochondrial [Glycine max]	gi|356500779	NCBI_Gmax.fasta	56943.4	1	6	8	8	0.00345	0.698	INQAVFPGLQGGPHNHTISGLAVALK	R	Q	0.95	3.3	0.587	0	1	1	0	2	2639.44	317	342	FALSE	gi|356552984,gi|296512839
	Serine hydroxymethyltransferase, mitochondrial [Glycine max]	gi|356500779	NCBI_Gmax.fasta	56943.4	1	6	8	8	0.00345	0.698	ISAVSIFFETMPYR	K	L	0.95	3.08	0.574	0	2	0	0	2	1660.84	186	199	FALSE	gi|356552984,gi|296512839
	Serine hydroxymethyltransferase, mitochondrial [Glycine max]	gi|356500779	NCBI_Gmax.fasta	56943.4	1	6	8	8	0.00345	0.698	KISAVSIFFETMPYR	K	L	0.95	5.05	0.599	0	2	0	0	2	1788.94	185	199	FALSE	gi|356552984,gi|296512839
	Serine hydroxymethyltransferase, mitochondrial [Glycine max]	gi|356500779	NCBI_Gmax.fasta	56943.4	1	6	8	8	0.00345	0.698	LIVAGASAYAR	K	L	0.95	3.45	0.518	0	1	0	0	2	1091.62	223	233	FALSE	gi|356552984,gi|296512839
	Serine hydroxymethyltransferase, mitochondrial [Glycine max]	gi|356500779	NCBI_Gmax.fasta	56943.4	1	6	8	8	0.00345	0.698	LKDFVAAMQSDEQVQSK	K	I	0.95	6.25	0.631	0	1	1	0	2	1923.95	469	485	TRUE
	Serine hydroxymethyltransferase, mitochondrial [Glycine max]	gi|356500779	NCBI_Gmax.fasta	56943.4	1	6	8	8	0.00345	0.698	LNESTGYIDYDQLEK	R	S	0.95	5.13	0.605	0	1	0	0	2	1787.83	200	214	FALSE	gi|356552984,gi|296512839
	Serine hydroxymethyltransferase, mitochondrial [Glycine max]	gi|356500779	NCBI_Gmax.fasta	56943.4	1	6	8	8	0.00345	0.698	NTVPGDVSAMVPGGIR	K	M	0.95	2.12	0.476	0	1	0	0	2	1585.8	412	427	FALSE	gi|356552984,gi|296512839
	Serine hydroxymethyltransferase, mitochondrial [Glycine max]	gi|356500779	NCBI_Gmax.fasta	56943.4	1	6	8	8	0.00345	0.698	QFPTIGFDIETMK	K	Y	0.95	2.67	0.317	0	1	0	0	2	1526.76	499	511	TRUE
	Serine hydroxymethyltransferase, mitochondrial [Glycine max]	gi|356500779	NCBI_Gmax.fasta	56943.4	1	6	8	8	0.00345	0.698	QLNDPLETIDPEIADIIELEK	K	A	0.95	3.48	0.557	0	1	0	0	2	2408.24	47	67	TRUE
	Serine hydroxymethyltransferase, mitochondrial [Glycine max]	gi|356500779	NCBI_Gmax.fasta	56943.4	1	6	8	8	0.00345	0.698	QVLSNCSAFAQSLLEK	K	G	0.95	3.56	0.526	0	1	0	0	2	1794.91	355	370	FALSE	gi|356552984,gi|296512839
	Serine hydroxymethyltransferase, mitochondrial [Glycine max]	gi|356500779	NCBI_Gmax.fasta	56943.4	1	6	8	8	0.00345	0.698	VAEYFDAAVK	K	L	0.95	2.52	0.503	0	1	0	0	2	1112.56	446	455	FALSE	gi|356552984,gi|296512839
	Serine hydroxymethyltransferase, mitochondrial [Glycine max]	gi|356500779	NCBI_Gmax.fasta	56943.4	1	6	8	8	0.00345	0.698	VLEAVHIAANK	K	N	0.95	3	0.624	0	1	0	0	2	1164.67	401	411	FALSE	gi|356552984,gi|296512839
	Serine hydroxymethyltransferase, mitochondrial [Glycine max]	gi|356500779	NCBI_Gmax.fasta	56943.4	1	6	8	8	0.00345	0.698	VLEAVHIAANKNTVPGDVSAMVPGGIR	K	M	0.95	4.73	0.586	0	0	2	0	2	2715.46	401	427	FALSE	gi|356552984,gi|296512839
	Serine hydroxymethyltransferase, mitochondrial [Glycine max]	gi|356500779	NCBI_Gmax.fasta	56943.4	1	6	8	8	0.00345	0.698	WGVNVQSLSGSPSNFQVYTALLKPHER	K	I	0.95	5	0.582	0	1	1	1	2	3014.55	137	163	FALSE	gi|356552984,gi|296512839
	Serine hydroxymethyltransferase, mitochondrial [Glycine max]	gi|356500779	NCBI_Gmax.fasta	56943.4	1	6	8	8	0.00345	0.698	YYGGNEYIDMAETLCQK	R	R	0.95	5.46	0.684	0	2	0	0	2	2054.88	108	124	FALSE	gi|356552984,gi|296512839
	Serine hydroxymethyltransferase, mitochondrial [Glycine max]	gi|356500779	NCBI_Gmax.fasta	56943.4	1	6	8	8	0.00345	0.698	YYGGNEYIDMAETLCQKR	R	A	0.95	4.27	0.695	0	1	1	0	2	2210.98	108	125	FALSE	gi|356552984,gi|296512839
Protein 3	Glycine dehydrogenase [decarboxylating] [Glycine max]	gi|356564051	NCBI_Gmax.fasta	114623	1	30	37	43	0.0185	0.465	DKATSNICTAQALLANMAAMYAVYHGPEGLK	R	N	0.95	6.59	0.683	0	0	1	1	2	3309.61	412	442	TRUE	gi|356514615,gi|227305854,gi|356509819,gi|356552354
	Glycine dehydrogenase [decarboxylating] [Glycine max]	gi|356564051	NCBI_Gmax.fasta	114623	1	30	37	43	0.0185	0.465	DLSLCHSMIPLGSCTMK	K	L	0.95	3.86	0.534	0	2	0	0	2	1949.9	582	598	TRUE	gi|356514615,gi|227305854,gi|356509819,gi|356552354
	Glycine dehydrogenase [decarboxylating] [Glycine max]	gi|356564051	NCBI_Gmax.fasta	114623	1	30	37	43	0.0185	0.465	FDAGLTESQMIEHMK	K	D	0.95	3.4	0.545	0	1	0	0	2	1736.8	142	156	TRUE
	Glycine dehydrogenase [decarboxylating] [Glycine max]	gi|356564051	NCBI_Gmax.fasta	114623	1	30	37	43	0.0185	0.465	FGVPMGYGGPHAAFLATSQEYKR	R	M	0.95	5.6	0.653	0	1	1	0	2	2484.21	357	379	TRUE	gi|356514615,gi|227305854,gi|356509819,gi|356552354
	Glycine dehydrogenase [decarboxylating] [Glycine max]	gi|356564051	NCBI_Gmax.fasta	114623	1	30	37	43	0.0185	0.465	GVNGTVAHEFIIDLR	R	G	0.95	4.56	0.423	0	1	0	0	2	1640.88	894	908	TRUE	gi|227305854,gi|356509819,gi|356552354
	Glycine dehydrogenase [decarboxylating] [Glycine max]	gi|356564051	NCBI_Gmax.fasta	114623	1	30	37	43	0.0185	0.465	IAILNANYMAK	K	R	0.95	3.27	0.517	0	1	0	0	2	1221.67	872	882	TRUE	gi|227305854,gi|356552354
	Glycine dehydrogenase [decarboxylating] [Glycine max]	gi|356564051	NCBI_Gmax.fasta	114623	1	30	37	43	0.0185	0.465	KLGTVEVQDLPFFDTVK	K	V	0.95	4.83	0.516	0	1	1	0	2	1936.04	461	477	TRUE
	Glycine dehydrogenase [decarboxylating] [Glycine max]	gi|356564051	NCBI_Gmax.fasta	114623	1	30	37	43	0.0185	0.465	KSPYLTHSIFNMYQTEHELLR	R	Y	0.95	4.85	0.52	0	0	1	0	2	2607.3	553	573	TRUE
	Glycine dehydrogenase [decarboxylating] [Glycine max]	gi|356564051	NCBI_Gmax.fasta	114623	1	30	37	43	0.0185	0.465	LENYYPVLFR	R	G	0.95	1.93	0.315	0	1	0	0	2	1313.69	884	893	TRUE	gi|227305854,gi|356552354
	Glycine dehydrogenase [decarboxylating] [Glycine max]	gi|356564051	NCBI_Gmax.fasta	114623	1	30	37	43	0.0185	0.465	LGTVEVQDLPFFDTVK	K	V	0.95	3.6	0.565	0	1	0	0	2	1807.95	462	477	TRUE
	Glycine dehydrogenase [decarboxylating] [Glycine max]	gi|356564051	NCBI_Gmax.fasta	114623	1	30	37	43	0.0185	0.465	MAESIGFESLDSLVDATVPK	K	S	0.95	4.67	0.644	0	2	0	0	2	2125.04	111	130	TRUE
	Glycine dehydrogenase [decarboxylating] [Glycine max]	gi|356564051	NCBI_Gmax.fasta	114623	1	30	37	43	0.0185	0.465	NIMENPAWYTQYTPYQAEISQGR	R	L	0.95	4.28	0.668	0	1	0	0	2	2760.27	185	207	TRUE	gi|356514615,gi|227305854,gi|356509819,gi|356552354
	Glycine dehydrogenase [decarboxylating] [Glycine max]	gi|356564051	NCBI_Gmax.fasta	114623	1	30	37	43	0.0185	0.465	NLICTLLPASQAVEEQAAATA	R	-	0.95	2.33	0.404	0	1	0	0	2	2171.1	1036	1056	TRUE	gi|227305854,gi|356552354
	Glycine dehydrogenase [decarboxylating] [Glycine max]	gi|356564051	NCBI_Gmax.fasta	114623	1	30	37	43	0.0185	0.465	NVCIIPVSAHGTNPASAAMCGMK	R	I	0.95	4.88	0.688	0	1	0	0	2	2386.11	679	701	TRUE	gi|227305854,gi|356552354
	Glycine dehydrogenase [decarboxylating] [Glycine max]	gi|356564051	NCBI_Gmax.fasta	114623	1	30	37	43	0.0185	0.465	QEIAEIEKGNADINNNVLK	R	S	0.95	4.73	0.493	0	1	1	0	2	2112.09	968	986	TRUE
	Glycine dehydrogenase [decarboxylating] [Glycine max]	gi|356564051	NCBI_Gmax.fasta	114623	1	30	37	43	0.0185	0.465	RLENYYPVLFR	K	G	0.95	4.04	0.603	0	1	0	0	2	1469.79	883	893	TRUE	gi|227305854,gi|356552354
	Glycine dehydrogenase [decarboxylating] [Glycine max]	gi|356564051	NCBI_Gmax.fasta	114623	1	30	37	43	0.0185	0.465	SAPHPPSLLMADAWTKPYSR	K	E	0.95	2.84	0.374	0	0	1	0	2	2241.11	987	1006	TRUE
	Glycine dehydrogenase [decarboxylating] [Glycine max]	gi|356564051	NCBI_Gmax.fasta	114623	1	30	37	43	0.0185	0.465	SGDVCGVLVQYPGTEGEVLDYGEFVK	K	K	0.95	4.97	0.692	0	1	0	0	2	2817.33	293	318	TRUE	gi|356514615,gi|227305854,gi|356552354
	Glycine dehydrogenase [decarboxylating] [Glycine max]	gi|356564051	NCBI_Gmax.fasta	114623	1	30	37	43	0.0185	0.465	SGDVCGVLVQYPGTEGEVLDYGEFVKK	K	A	0.95	3.63	0.44	0	0	1	0	2	2945.42	293	319	TRUE	gi|227305854,gi|356552354
	Glycine dehydrogenase [decarboxylating] [Glycine max]	gi|356564051	NCBI_Gmax.fasta	114623	1	30	37	43	0.0185	0.465	SPYLTHSIFNMYQTEHELLR	K	Y	0.95	5.09	0.615	0	0	1	0	2	2479.21	554	573	TRUE
	Glycine dehydrogenase [decarboxylating] [Glycine max]	gi|356564051	NCBI_Gmax.fasta	114623	1	30	37	43	0.0185	0.465	SYIGMGYYNTHVPPVILR	K	N	0.95	2.89	0.568	0	1	2	0	2	2080.07	167	184	TRUE	gi|356514615,gi|227305854,gi|356509819,gi|356552354
	Glycine dehydrogenase [decarboxylating] [Glycine max]	gi|356564051	NCBI_Gmax.fasta	114623	1	30	37	43	0.0185	0.465	TFCIPHGGGGPGMGPIGVK	K	K	0.95	2.84	0.472	0	2	0	0	2	1854.9	792	810	TRUE	gi|356514615,gi|227305854,gi|356509819,gi|356552354
	Glycine dehydrogenase [decarboxylating] [Glycine max]	gi|356564051	NCBI_Gmax.fasta	114623	1	30	37	43	0.0185	0.465	TFCIPHGGGGPGMGPIGVKK	K	H	0.95	3.3	0.606	0	2	1	0	2	1967	792	811	TRUE	gi|356514615,gi|227305854,gi|356509819,gi|356552354
	Glycine dehydrogenase [decarboxylating] [Glycine max]	gi|356564051	NCBI_Gmax.fasta	114623	1	30	37	43	0.0185	0.465	TFIIASNCHPQTIDICK	K	T	0.95	4.32	0.556	0	1	1	0	2	2017.98	255	271	TRUE	gi|227305854,gi|356552354
	Glycine dehydrogenase [decarboxylating] [Glycine max]	gi|356564051	NCBI_Gmax.fasta	114623	1	30	37	43	0.0185	0.465	TSNAHAIADAALK	K	S	0.95	2.37	0.271	0	1	0	0	2	1282.67	480	492	TRUE	gi|227305854,gi|356552354
	Glycine dehydrogenase [decarboxylating] [Glycine max]	gi|356564051	NCBI_Gmax.fasta	114623	1	30	37	43	0.0185	0.465	VFAGGKPVPFTAASLAPEVQSAIPSGLVR	K	K	0.95	3.76	0.492	0	0	1	0	2	2866.58	524	552	TRUE
	Glycine dehydrogenase [decarboxylating] [Glycine max]	gi|356564051	NCBI_Gmax.fasta	114623	1	30	37	43	0.0185	0.465	VHGLAGAFALGLKK	R	L	0.95	3.91	0.564	0	1	0	0	2	1381.83	448	461	TRUE	gi|227305854,gi|356552354
	Glycine dehydrogenase [decarboxylating] [Glycine max]	gi|356564051	NCBI_Gmax.fasta	114623	1	30	37	43	0.0185	0.465	VVDGNTITVAFDETTTLEDVDNLFK	R	V	0.95	4.29	0.588	0	1	0	0	2	2756.35	499	523	TRUE	gi|356514615,gi|227305854,gi|356509819,gi|356552354
	Glycine dehydrogenase [decarboxylating] [Glycine max]	gi|356564051	NCBI_Gmax.fasta	114623	1	30	37	43	0.0185	0.465	VVMASDLLALTVLKPPGEFGADIVVGSAQR	K	F	0.95	3.26	0.343	0	0	2	0	2	3069.67	327	356	TRUE	gi|227305854,gi|356552354
	Glycine dehydrogenase [decarboxylating] [Glycine max]	gi|356564051	NCBI_Gmax.fasta	114623	1	30	37	43	0.0185	0.465	VVTADLKDIDYK	K	S	0.95	3.21	0.536	0	1	0	0	2	1379.74	281	292	TRUE	gi|227305854,gi|356552354
	Glycine dehydrogenase [decarboxylating] [Glycine max]	gi|356509819	NCBI_Gmax.fasta	111987	1	15	17	17	0.00733	0.4	DKATSNICTAQALLANMAAMYAVYHGPEGLK	R	T	0.95	6.59	0.683	0	0	1	1	2	3309.61	387	417	FALSE	gi|356514615,gi|227305854,gi|356564051,gi|356552354
	Glycine dehydrogenase [decarboxylating] [Glycine max]	gi|356509819	NCBI_Gmax.fasta	111987	1	15	17	17	0.00733	0.4	DLSLCHSMIPLGSCTMK	K	L	0.95	3.86	0.534	0	2	0	0	2	1949.9	557	573	FALSE	gi|356514615,gi|227305854,gi|356564051,gi|356552354
	Glycine dehydrogenase [decarboxylating] [Glycine max]	gi|356509819	NCBI_Gmax.fasta	111987	1	15	17	17	0.00733	0.4	EYAAFPASWLR	R	V	0.95	1.74	0.347	0	1	0	0	2	1310.65	982	992	TRUE	gi|356514615
	Glycine dehydrogenase [decarboxylating] [Glycine max]	gi|356509819	NCBI_Gmax.fasta	111987	1	15	17	17	0.00733	0.4	FGVPMGYGGPHAAFLATSQEYKR	R	M	0.95	5.6	0.653	0	1	1	0	2	2484.21	332	354	FALSE	gi|356514615,gi|227305854,gi|356564051,gi|356552354
	Glycine dehydrogenase [decarboxylating] [Glycine max]	gi|356509819	NCBI_Gmax.fasta	111987	1	15	17	17	0.00733	0.4	GVNGTVAHEFIIDLR	R	G	0.95	4.56	0.423	0	1	0	0	2	1640.88	869	883	FALSE	gi|227305854,gi|356564051,gi|356552354
	Glycine dehydrogenase [decarboxylating] [Glycine max]	gi|356509819	NCBI_Gmax.fasta	111987	1	15	17	17	0.00733	0.4	IIGVSVDSSGKPALR	R	M	0.95	3.19	0.51	0	1	0	0	2	1498.86	360	374	TRUE
	Glycine dehydrogenase [decarboxylating] [Glycine max]	gi|356509819	NCBI_Gmax.fasta	111987	1	15	17	17	0.00733	0.4	KLGTVEVQDHPFFDTVK	K	I	0.95	4.51	0.579	0	1	1	0	2	1960.02	436	452	TRUE	gi|356514615
	Glycine dehydrogenase [decarboxylating] [Glycine max]	gi|356509819	NCBI_Gmax.fasta	111987	1	15	17	17	0.00733	0.4	KSPYLTHPIFNTYHTEHELLR	R	Y	0.95	3.44	0.451	0	0	1	0	2	2596.33	528	548	TRUE
	Glycine dehydrogenase [decarboxylating] [Glycine max]	gi|356509819	NCBI_Gmax.fasta	111987	1	15	17	17	0.00733	0.4	LGTVEVQDHPFFDTVK	K	I	0.95	4.14	0.592	0	1	0	0	2	1831.92	437	452	TRUE	gi|356514615
	Glycine dehydrogenase [decarboxylating] [Glycine max]	gi|356509819	NCBI_Gmax.fasta	111987	1	15	17	17	0.00733	0.4	LNDMSFSVFNEGLTESEMSSHMNSLASK	R	N	0.95	3.16	0.415	0	0	1	0	2	3092.36	109	136	TRUE
	Glycine dehydrogenase [decarboxylating] [Glycine max]	gi|356509819	NCBI_Gmax.fasta	111987	1	15	17	17	0.00733	0.4	MAQTCGFDSLDSLIDATVPK	K	S	0.95	5.74	0.718	0	1	0	0	2	2169.02	86	105	TRUE
	Glycine dehydrogenase [decarboxylating] [Glycine max]	gi|356509819	NCBI_Gmax.fasta	111987	1	15	17	17	0.00733	0.4	NIMENPAWYTQYTPYQAEISQGR	R	L	0.95	4.28	0.668	0	1	0	0	2	2760.27	160	182	FALSE	gi|356514615,gi|227305854,gi|356564051,gi|356552354
	Glycine dehydrogenase [decarboxylating] [Glycine max]	gi|356509819	NCBI_Gmax.fasta	111987	1	15	17	17	0.00733	0.4	NLVCTLLPTSQVVEEQAAATA	R	-	0.95	2.53	0.373	0	1	0	0	2	2215.13	1011	1031	TRUE
	Glycine dehydrogenase [decarboxylating] [Glycine max]	gi|356509819	NCBI_Gmax.fasta	111987	1	15	17	17	0.00733	0.4	NVCIIPVSAHGTNPASAAMCAMK	R	I	0.95	2.77	0.335	0	0	1	0	2	2400.13	654	676	TRUE	gi|356514615
	Glycine dehydrogenase [decarboxylating] [Glycine max]	gi|356509819	NCBI_Gmax.fasta	111987	1	15	17	17	0.00733	0.4	RLENHYPVLFR	K	G	0.95	3.15	0.428	0	1	0	0	2	1443.79	858	868	TRUE	gi|356514615
	Glycine dehydrogenase [decarboxylating] [Glycine max]	gi|356509819	NCBI_Gmax.fasta	111987	1	15	17	17	0.00733	0.4	SYIGMGYYNTHVPPVILR	K	N	0.95	2.89	0.568	0	1	2	0	2	2080.07	142	159	FALSE	gi|356514615,gi|227305854,gi|356564051,gi|356552354
	Glycine dehydrogenase [decarboxylating] [Glycine max]	gi|356509819	NCBI_Gmax.fasta	111987	1	15	17	17	0.00733	0.4	TAILNANYMAK	K	R	0.95	2.24	0.476	0	1	0	0	2	1209.63	847	857	TRUE	gi|356514615
	Glycine dehydrogenase [decarboxylating] [Glycine max]	gi|356509819	NCBI_Gmax.fasta	111987	1	15	17	17	0.00733	0.4	TANAHAIADAACKNEINLR	R	V	0.95	4.35	0.567	0	1	1	0	2	2053.02	455	473	TRUE
	Glycine dehydrogenase [decarboxylating] [Glycine max]	gi|356509819	NCBI_Gmax.fasta	111987	1	15	17	17	0.00733	0.4	TFCIPHGGGGPGMGPIGVK	K	K	0.95	2.84	0.472	0	2	0	0	2	1854.9	767	785	FALSE	gi|356514615,gi|227305854,gi|356564051,gi|356552354
	Glycine dehydrogenase [decarboxylating] [Glycine max]	gi|356509819	NCBI_Gmax.fasta	111987	1	15	17	17	0.00733	0.4	TFCIPHGGGGPGMGPIGVKK	K	H	0.95	3.3	0.606	0	2	1	0	2	1967	767	786	FALSE	gi|356514615,gi|227305854,gi|356564051,gi|356552354
	Glycine dehydrogenase [decarboxylating] [Glycine max]	gi|356509819	NCBI_Gmax.fasta	111987	1	15	17	17	0.00733	0.4	VHGLAGVFAQGLK	R	K	0.95	1.89	0.322	0	1	0	0	2	1296.74	423	435	TRUE	gi|356514615
	Glycine dehydrogenase [decarboxylating] [Glycine max]	gi|356509819	NCBI_Gmax.fasta	111987	1	15	17	17	0.00733	0.4	VHGLAGVFAQGLKK	R	L	0.95	4.08	0.6	0	1	0	0	2	1424.84	423	436	TRUE	gi|356514615
	Glycine dehydrogenase [decarboxylating] [Glycine max]	gi|356509819	NCBI_Gmax.fasta	111987	1	15	17	17	0.00733	0.4	VVDGNTITVAFDETTTLEDVDNLFK	R	V	0.95	4.29	0.588	0	1	0	0	2	2756.35	474	498	FALSE	gi|356514615,gi|227305854,gi|356564051,gi|356552354
	Glycine dehydrogenase [decarboxylating] [Glycine max]	gi|356509819	NCBI_Gmax.fasta	111987	1	15	17	17	0.00733	0.4	VVMGTDLLALTVLKPPGEMGVDIVVGSAQR	K	F	0.95	2.79	0.361	0	0	1	0	2	3065.67	302	331	TRUE
	Glycine dehydrogenase [decarboxylating] [Glycine max]	gi|356514615	NCBI_Gmax.fasta	111038	1	5	5	5	0.00216	0.354	DKATSNICTAQALLANMAAMYAVYHGPEGLK	R	T	0.95	6.59	0.683	0	0	1	1	2	3309.61	379	409	FALSE	gi|227305854,gi|356564051,gi|356509819,gi|356552354
	Glycine dehydrogenase [decarboxylating] [Glycine max]	gi|356514615	NCBI_Gmax.fasta	111038	1	5	5	5	0.00216	0.354	DLSLCHSMIPLGSCTMK	K	L	0.95	3.86	0.534	0	2	0	0	2	1949.9	549	565	FALSE	gi|227305854,gi|356564051,gi|356509819,gi|356552354
	Glycine dehydrogenase [decarboxylating] [Glycine max]	gi|356514615	NCBI_Gmax.fasta	111038	1	5	5	5	0.00216	0.354	EYAAFPASWLR	R	V	0.95	1.74	0.347	0	1	0	0	2	1310.65	974	984	FALSE	gi|356509819
	Glycine dehydrogenase [decarboxylating] [Glycine max]	gi|356514615	NCBI_Gmax.fasta	111038	1	5	5	5	0.00216	0.354	FGVPMGYGGPHAAFLATSQEYKR	R	M	0.95	5.6	0.653	0	1	1	0	2	2484.21	324	346	FALSE	gi|227305854,gi|356564051,gi|356509819,gi|356552354
	Glycine dehydrogenase [decarboxylating] [Glycine max]	gi|356514615	NCBI_Gmax.fasta	111038	1	5	5	5	0.00216	0.354	GVNGTVAHEFIVDLR	R	G	0.95	3.66	0.438	0	1	0	0	2	1626.86	861	875	TRUE
	Glycine dehydrogenase [decarboxylating] [Glycine max]	gi|356514615	NCBI_Gmax.fasta	111038	1	5	5	5	0.00216	0.354	HLAPFLPSHPVVSTGGIPAPGK	K	S	0.95	4.53	0.612	0	0	1	0	2	2179.2	779	800	TRUE
	Glycine dehydrogenase [decarboxylating] [Glycine max]	gi|356514615	NCBI_Gmax.fasta	111038	1	5	5	5	0.00216	0.354	IIGVSVDSGGKPALR	R	M	0.95	3.39	0.492	0	1	0	0	2	1468.85	352	366	TRUE
	Glycine dehydrogenase [decarboxylating] [Glycine max]	gi|356514615	NCBI_Gmax.fasta	111038	1	5	5	5	0.00216	0.354	KLGTVEVQDHPFFDTVK	K	I	0.95	4.51	0.579	0	1	1	0	2	1960.02	428	444	FALSE	gi|356509819
	Glycine dehydrogenase [decarboxylating] [Glycine max]	gi|356514615	NCBI_Gmax.fasta	111038	1	5	5	5	0.00216	0.354	LGTVEVQDHPFFDTVK	K	I	0.95	4.14	0.592	0	1	0	0	2	1831.92	429	444	FALSE	gi|356509819
	Glycine dehydrogenase [decarboxylating] [Glycine max]	gi|356514615	NCBI_Gmax.fasta	111038	1	5	5	5	0.00216	0.354	MAQTCGFDTLDSLIDATVPK	K	S	0.95	6.12	0.456	0	1	0	0	2	2183.04	78	97	TRUE
	Glycine dehydrogenase [decarboxylating] [Glycine max]	gi|356514615	NCBI_Gmax.fasta	111038	1	5	5	5	0.00216	0.354	NIMENPAWYTQYTPYQAEISQGR	R	L	0.95	4.28	0.668	0	1	0	0	2	2760.27	152	174	FALSE	gi|227305854,gi|356564051,gi|356509819,gi|356552354
	Glycine dehydrogenase [decarboxylating] [Glycine max]	gi|356514615	NCBI_Gmax.fasta	111038	1	5	5	5	0.00216	0.354	NSPYLTHPIFNTYHTEHEVLR	R	Y	0.95	3.46	0.46	0	0	1	0	2	2568.26	520	540	TRUE
	Glycine dehydrogenase [decarboxylating] [Glycine max]	gi|356514615	NCBI_Gmax.fasta	111038	1	5	5	5	0.00216	0.354	NVCIIPVSAHGTNPASAAMCAMK	R	I	0.95	2.77	0.335	0	0	1	0	2	2400.13	646	668	FALSE	gi|356509819
	Glycine dehydrogenase [decarboxylating] [Glycine max]	gi|356514615	NCBI_Gmax.fasta	111038	1	5	5	5	0.00216	0.354	RLENHYPVLFR	K	G	0.95	3.15	0.428	0	1	0	0	2	1443.79	850	860	FALSE	gi|356509819
	Glycine dehydrogenase [decarboxylating] [Glycine max]	gi|356514615	NCBI_Gmax.fasta	111038	1	5	5	5	0.00216	0.354	SGDVCGVLVQYPGTEGEVLDYGEFVK	K	E	0.95	4.97	0.692	0	1	0	0	2	2817.33	260	285	FALSE	gi|227305854,gi|356564051,gi|356552354
	Glycine dehydrogenase [decarboxylating] [Glycine max]	gi|356514615	NCBI_Gmax.fasta	111038	1	5	5	5	0.00216	0.354	SYIGMGYYNTHVPPVILR	K	N	0.95	2.89	0.568	0	1	2	0	2	2080.07	134	151	FALSE	gi|227305854,gi|356564051,gi|356509819,gi|356552354
	Glycine dehydrogenase [decarboxylating] [Glycine max]	gi|356514615	NCBI_Gmax.fasta	111038	1	5	5	5	0.00216	0.354	TAILNANYMAK	K	R	0.95	2.24	0.476	0	1	0	0	2	1209.63	839	849	FALSE	gi|356509819
	Glycine dehydrogenase [decarboxylating] [Glycine max]	gi|356514615	NCBI_Gmax.fasta	111038	1	5	5	5	0.00216	0.354	TFCIPHGGGGPGMGPIGVK	K	K	0.95	2.84	0.472	0	2	0	0	2	1854.9	759	777	FALSE	gi|227305854,gi|356564051,gi|356509819,gi|356552354
	Glycine dehydrogenase [decarboxylating] [Glycine max]	gi|356514615	NCBI_Gmax.fasta	111038	1	5	5	5	0.00216	0.354	TFCIPHGGGGPGMGPIGVKK	K	H	0.95	3.3	0.606	0	2	1	0	2	1967	759	778	FALSE	gi|227305854,gi|356564051,gi|356509819,gi|356552354
	Glycine dehydrogenase [decarboxylating] [Glycine max]	gi|356514615	NCBI_Gmax.fasta	111038	1	5	5	5	0.00216	0.354	VHGLAGVFAQGLK	R	K	0.95	1.89	0.322	0	1	0	0	2	1296.74	415	427	FALSE	gi|356509819
	Glycine dehydrogenase [decarboxylating] [Glycine max]	gi|356514615	NCBI_Gmax.fasta	111038	1	5	5	5	0.00216	0.354	VHGLAGVFAQGLKK	R	L	0.95	4.08	0.6	0	1	0	0	2	1424.84	415	428	FALSE	gi|356509819
	Glycine dehydrogenase [decarboxylating] [Glycine max]	gi|356514615	NCBI_Gmax.fasta	111038	1	5	5	5	0.00216	0.354	VVDGNTITVAFDETTTLEDVDNLFK	R	V	0.95	4.29	0.588	0	1	0	0	2	2756.35	466	490	FALSE	gi|227305854,gi|356564051,gi|356509819,gi|356552354
Protein 4	Sucrose synthase [Glycine max]	gi|2606081,gi|351723161,gi|356565637,gi|3915873,gi|571533647	NCBI_Gmax.fasta	92245.7	1	11	11	11	0.00474	0.16	ELQGKPDLIVGNYSDGNIVASLLAHK	K	L	0.95	5.3	0.662	0	0	1	0	2	2751.47	401	426	TRUE
	Sucrose synthase [Glycine max]	gi|2606081,gi|351723161,gi|356565637,gi|3915873,gi|571533647	NCBI_Gmax.fasta	92245.7	1	11	11	11	0.00474	0.16	ELVNLVVVAGDR	R	R	0.95	3.02	0.483	0	1	0	0	2	1283.73	600	611	TRUE
	Sucrose synthase [Glycine max]	gi|2606081,gi|351723161,gi|356565637,gi|3915873,gi|571533647	NCBI_Gmax.fasta	92245.7	1	11	11	11	0.00474	0.16	IQNPDALQHVLR	R	K	0.95	3.43	0.47	0	1	0	0	2	1403.78	198	209	TRUE
	Sucrose synthase [Glycine max]	gi|2606081,gi|351723161,gi|356565637,gi|3915873,gi|571533647	NCBI_Gmax.fasta	92245.7	1	11	11	11	0.00474	0.16	LDETLTANRNEILALLSR	R	I	0.95	2.89	0.304	0	0	1	0	2	2042.12	16	33	TRUE
	Sucrose synthase [Glycine max]	gi|2606081,gi|351723161,gi|356565637,gi|3915873,gi|571533647	NCBI_Gmax.fasta	92245.7	1	11	11	11	0.00474	0.16	LGVTQCTIAHALEK	K	T	0.95	3.79	0.416	0	1	0	0	2	1540.82	427	440	TRUE
	Sucrose synthase [Glycine max]	gi|2606081,gi|351723161,gi|356565637,gi|3915873,gi|571533647	NCBI_Gmax.fasta	92245.7	1	11	11	11	0.00474	0.16	LLTLTGVYGFWK	R	H	0.95	2.84	0.465	0	1	0	0	2	1397.78	760	771	TRUE
	Sucrose synthase [Glycine max]	gi|2606081,gi|351723161,gi|356565637,gi|3915873,gi|571533647	NCBI_Gmax.fasta	92245.7	1	11	11	11	0.00474	0.16	LRELVNLVVVAGDR	K	R	0.95	4.63	0.618	0	1	0	0	2	1552.92	598	611	TRUE
	Sucrose synthase [Glycine max]	gi|2606081,gi|351723161,gi|356565637,gi|3915873,gi|571533647	NCBI_Gmax.fasta	92245.7	1	11	11	11	0.00474	0.16	NITGLVEWYGK	K	N	0.95	2.3	0.456	0	2	0	0	2	1279.67	584	594	TRUE
	Sucrose synthase [Glycine max]	gi|2606081,gi|351723161,gi|356565637,gi|3915873,gi|571533647	NCBI_Gmax.fasta	92245.7	1	11	11	11	0.00474	0.16	TKYPESDIYWK	K	K	0.95	2.72	0.538	0	1	0	0	2	1429.7	441	451	TRUE
	Sucrose synthase [Glycine max]	gi|2606081,gi|351723161,gi|356565637,gi|3915873,gi|571533647	NCBI_Gmax.fasta	92245.7	1	11	11	11	0.00474	0.16	VVHGIDVFDPK	R	F	0.95	2.17	0.391	0	1	0	0	2	1225.66	508	518	TRUE
Protein 5	Lipoxygenase [Glycine max]	gi|351727312,gi|439857,gi|585418	NCBI_Gmax.fasta	96539.7	1	10	10	10	0.00431	0.164	EHLEPNLGGLTVEQAIQNKK	K	L	0.95	1.65	0.289	0	0	1	0	2	2218.18	399	418	TRUE
	Lipoxygenase [Glycine max]	gi|351727312,gi|439857,gi|585418	NCBI_Gmax.fasta	96539.7	1	10	10	10	0.00431	0.164	EIFRTDGEQFLK	K	Y	0.95	2.56	0.203	0	2	0	0	2	1482.76	328	339	TRUE
	Lipoxygenase [Glycine max]	gi|351727312,gi|439857,gi|585418	NCBI_Gmax.fasta	96539.7	1	10	10	10	0.00431	0.164	IFFANNTYLPSETPAPLLK	R	Y	0.95	4.08	0.598	0	1	0	0	2	2136.14	156	174	TRUE
	Lipoxygenase [Glycine max]	gi|351727312,gi|439857,gi|585418	NCBI_Gmax.fasta	96539.7	1	10	10	10	0.00431	0.164	IIEEFPLSSK	K	L	0.95	2.53	0.359	0	1	0	0	2	1162.64	374	383	TRUE
	Lipoxygenase [Glycine max]	gi|351727312,gi|439857,gi|585418	NCBI_Gmax.fasta	96539.7	1	10	10	10	0.00431	0.164	LDTQAYGDHTCIIAK	K	E	0.95	3.72	0.39	0	1	0	0	2	1705.82	384	398	TRUE
	Lipoxygenase [Glycine max]	gi|351727312,gi|439857,gi|585418	NCBI_Gmax.fasta	96539.7	1	10	10	10	0.00431	0.164	LFILDHHDYLIPYLR	K	K	0.95	3.71	0.447	0	0	1	0	2	1928.04	419	433	TRUE
	Lipoxygenase [Glycine max]	gi|351727312,gi|439857,gi|585418	NCBI_Gmax.fasta	96539.7	1	10	10	10	0.00431	0.164	LYEGGVTLPTNFLSK	K	I	0.95	3.1	0.475	0	1	0	0	2	1638.87	305	319	TRUE
	Lipoxygenase [Glycine max]	gi|351727312,gi|439857,gi|585418	NCBI_Gmax.fasta	96539.7	1	10	10	10	0.00431	0.164	MPYTLLYPSSEEGLTFR	K	G	0.95	2.9	0.566	0	1	0	0	2	2003.98	829	845	TRUE
	Lipoxygenase [Glycine max]	gi|351727312,gi|439857,gi|585418	NCBI_Gmax.fasta	96539.7	1	10	10	10	0.00431	0.164	YARPVLGGSALPYPR	K	R	0.95	3.01	0.471	0	1	0	0	2	1616.89	215	229	TRUE
Protein 6	Glyceraldehyde-3-phosphate dehydrogenase [Glycine max]	gi|351727206,gi|85720768	NCBI_Gmax.fasta	36764.6	1	8	8	9	0.00388	0.379	AASFNIIPSSTGAAK	R	A	0.95	2.11	0.456	0	1	0	0	2	1434.76	203	217	TRUE
	Glyceraldehyde-3-phosphate dehydrogenase [Glycine max]	gi|351727206,gi|85720768	NCBI_Gmax.fasta	36764.6	1	8	8	9	0.00388	0.379	EASYDEIKNAIKEESEGK	K	L	0.95	3.43	0.44	0	0	1	0	2	2039.98	254	271	TRUE
	Glyceraldehyde-3-phosphate dehydrogenase [Glycine max]	gi|351727206,gi|85720768	NCBI_Gmax.fasta	36764.6	1	8	8	9	0.00388	0.379	FGIVEGLMTTVHSITATQK	R	T	0.95	4.17	0.442	0	2	0	0	2	2049.07	170	188	TRUE
	Glyceraldehyde-3-phosphate dehydrogenase [Glycine max]	gi|351727206,gi|85720768	NCBI_Gmax.fasta	36764.6	1	8	8	9	0.00388	0.379	LVSWYDNEWGYSSR	K	V	0.95	3.51	0.607	0	1	0	0	2	1761.79	312	325	TRUE
	Glyceraldehyde-3-phosphate dehydrogenase [Glycine max]	gi|351727206,gi|85720768	NCBI_Gmax.fasta	36764.6	1	8	8	9	0.00388	0.379	STGADIIVESTGVFTDKDK	G	A	0.95	3.85	0.443	0	1	0	0	2	1982.99	91	109	TRUE
	Glyceraldehyde-3-phosphate dehydrogenase [Glycine max]	gi|351727206,gi|85720768	NCBI_Gmax.fasta	36764.6	1	8	8	9	0.00388	0.379	TLLFGDKPVTIFGHR	K	N	0.95	3.2	0.399	0	0	1	0	2	1700.95	68	82	TRUE
	Glyceraldehyde-3-phosphate dehydrogenase [Glycine max]	gi|351727206,gi|85720768	NCBI_Gmax.fasta	36764.6	1	8	8	9	0.00388	0.379	VIDLLVFVAKK	R	S	0.95	3.39	0.487	0	1	0	0	2	1244.8	326	336	TRUE
	Glyceraldehyde-3-phosphate dehydrogenase [Glycine max]	gi|351727206,gi|85720768	NCBI_Gmax.fasta	36764.6	1	8	8	9	0.00388	0.379	VPTVDVSVVDLTVRLEK	R	E	0.95	4.77	0.578	0	1	0	0	2	1869.07	237	253	TRUE
Protein 7	Glycine hydroxymethyltransferase / Threonine aldolase	gi|134273440,gi|222142535,gi|227307926,gi|296512835,gi|351724373,gi|571495664	NCBI_Gmax.fasta	57380.1	1	7	7	8	0.00345	0.222	AVMEAVGSCLTNK	R	Y	0.95	3.44	0.457	0	1	0	0	2	1379.67	115	127	TRUE
	Glycine hydroxymethyltransferase / Threonine aldolase	gi|134273440,gi|222142535,gi|227307926,gi|296512835,gi|351724373,gi|571495664	NCBI_Gmax.fasta	57380.1	1	7	7	8	0.00345	0.222	IMGLDLPHGGHLSHGFMTPK	R	K	0.95	3.09	0.397	0	0	2	0	2	2145.07	193	212	TRUE
	Glycine hydroxymethyltransferase / Threonine aldolase	gi|134273440,gi|222142535,gi|227307926,gi|296512835,gi|351724373,gi|571495664	NCBI_Gmax.fasta	57380.1	1	7	7	8	0.00345	0.222	LDESTGLIDYDMLEK	R	T	0.95	3.57	0.54	0	1	0	0	2	1741.82	229	243	TRUE
	Glycine hydroxymethyltransferase / Threonine aldolase	gi|134273440,gi|222142535,gi|227307926,gi|296512835,gi|351724373,gi|571495664	NCBI_Gmax.fasta	57380.1	1	7	7	8	0.00345	0.222	LVSGGSDNHLVLVDLRPSGLDGAR	K	V	0.95	2.69	0.406	0	0	1	0	2	2447.3	395	418	TRUE
	Glycine hydroxymethyltransferase / Threonine aldolase	gi|134273440,gi|222142535,gi|227307926,gi|296512835,gi|351724373,gi|571495664	NCBI_Gmax.fasta	57380.1	1	7	7	8	0.00345	0.222	SLELIASENFTSR	K	A	0.95	2.3	0.375	0	1	0	0	2	1466.75	102	114	TRUE
	Glycine hydroxymethyltransferase / Threonine aldolase	gi|134273440,gi|222142535,gi|227307926,gi|296512835,gi|351724373,gi|571495664	NCBI_Gmax.fasta	57380.1	1	7	7	8	0.00345	0.222	VSATSIYFESMPYR	R	L	0.95	2.52	0.532	0	1	0	0	2	1650.78	215	228	TRUE
	Glycine hydroxymethyltransferase / Threonine aldolase	gi|134273440,gi|222142535,gi|227307926,gi|296512835,gi|351724373,gi|571495664	NCBI_Gmax.fasta	57380.1	1	7	7	8	0.00345	0.222	YYGGNEYIDELEILCQQR	R	A	0.95	4.12	0.613	0	1	0	0	2	2263.03	137	154	TRUE
Protein 8	Seed linoleate 9S-lipoxygenase; AltName: Full=Lipoxygenase [Glycine max]	gi|126411,gi|18746	NCBI_Gmax.fasta	96821.5	1	8	8	8	0.00345	0.134	EVIAGVNPNVIR	R	R	0.95	3.07	0.294	0	1	0	0	2	1280.73	373	384	TRUE
	Seed linoleate 9S-lipoxygenase; AltName: Full=Lipoxygenase [Glycine max]	gi|126411,gi|18746	NCBI_Gmax.fasta	96821.5	1	8	8	8	0.00345	0.134	GLAIEDPSAPHGLR	R	L	0.95	3.91	0.507	0	1	0	0	2	1432.75	615	628	TRUE
	Seed linoleate 9S-lipoxygenase; AltName: Full=Lipoxygenase [Glycine max]	gi|126411,gi|18746	NCBI_Gmax.fasta	96821.5	1	8	8	8	0.00345	0.134	IFFVNDTYLPSATPAPLLK	R	Y	0.95	4.07	0.575	0	1	0	0	2	2107.15	168	186	TRUE
	Seed linoleate 9S-lipoxygenase; AltName: Full=Lipoxygenase [Glycine max]	gi|126411,gi|18746	NCBI_Gmax.fasta	96821.5	1	8	8	8	0.00345	0.134	NISMQLISATQTDGSGNGK	R	V	0.95	2.56	0.489	0	1	0	0	2	1921.93	65	83	TRUE
	Seed linoleate 9S-lipoxygenase; AltName: Full=Lipoxygenase [Glycine max]	gi|126411,gi|18746	NCBI_Gmax.fasta	96821.5	1	8	8	8	0.00345	0.134	NWVFTDQALPADLVK	K	R	0.95	4.06	0.54	0	1	0	0	2	1716.9	599	613	TRUE
	Seed linoleate 9S-lipoxygenase; AltName: Full=Lipoxygenase [Glycine max]	gi|126411,gi|18746	NCBI_Gmax.fasta	96821.5	1	8	8	8	0.00345	0.134	TGPVQLPYTLLHR	R	S	0.95	2.67	0.454	0	1	0	0	2	1494.84	835	847	TRUE
	Seed linoleate 9S-lipoxygenase; AltName: Full=Lipoxygenase [Glycine max]	gi|126411,gi|18746	NCBI_Gmax.fasta	96821.5	1	8	8	8	0.00345	0.134	VTSSEFESFEDVR	R	S	0.95	3.01	0.494	0	1	0	0	2	1531.69	302	314	TRUE
	Seed linoleate 9S-lipoxygenase; AltName: Full=Lipoxygenase [Glycine max]	gi|126411,gi|18746	NCBI_Gmax.fasta	96821.5	1	8	8	8	0.00345	0.134	YSIEMSSSVYK	K	N	0.95	2.04	0.353	0	1	0	0	2	1293.6	588	598	TRUE
Protein 9	Glycine dehydrogenase (aminomethyl-transferring) / Glycine-cleavage complex P-protein [Glycine max]	gi|152942813	NCBI_Gmax.fasta	17624.2	1	6	7	7	0.00302	0.559	ATTCLESIESIDEQNK	K	T	0.95	3.34	0.578	0	1	0	0	2	1837.85	66	81	TRUE
	Glycine dehydrogenase (aminomethyl-transferring) / Glycine-cleavage complex P-protein [Glycine max]	gi|152942813	NCBI_Gmax.fasta	17624.2	1	6	7	7	0.00302	0.559	FTFQAIDKDQGGAFIK	K	W	0.95	4.73	0.537	0	1	0	0	2	1785.92	101	116	TRUE
	Glycine dehydrogenase (aminomethyl-transferring) / Glycine-cleavage complex P-protein [Glycine max]	gi|152942813	NCBI_Gmax.fasta	17624.2	1	6	7	7	0.00302	0.559	ITTEIGVHATAAK	K	W	0.95	3.02	0.49	0	1	0	0	2	1311.73	7	19	TRUE
	Glycine dehydrogenase (aminomethyl-transferring) / Glycine-cleavage complex P-protein [Glycine max]	gi|152942813	NCBI_Gmax.fasta	17624.2	1	6	7	7	0.00302	0.559	LAEEVDPPYGYIEYLHK	R	C	0.95	3.03	0.403	0	1	0	0	2	2036	124	140	TRUE
	Glycine dehydrogenase (aminomethyl-transferring) / Glycine-cleavage complex P-protein [Glycine max]	gi|152942813	NCBI_Gmax.fasta	17624.2	1	6	7	7	0.00302	0.559	WFNLFATQLHHVQNLTDR	K	V	0.95	4.92	0.6	0	1	1	0	2	2240.14	20	37	TRUE	gi|351726098,gi|255627117
	Glycine dehydrogenase (aminomethyl-transferring) / Glycine-cleavage complex P-protein [Glycine max]	gi|152942813	NCBI_Gmax.fasta	17624.2	1	6	7	7	0.00302	0.559	WFNLFATQLHHVQNLTDRVHGTK	K	L	0.95	4.11	0.487	0	0	1	0	2	2762.43	20	42	TRUE	gi|351726098,gi|255627117
	Glycine dehydrogenase (aminomethyl-transferring) / Glycine-cleavage complex P-protein [Glycine max]	gi|227305854,gi|356552354	NCBI_Gmax.fasta	114939	1	7	7	7	0.00302	0.418	DKATSNICTAQALLANMAAMYAVYHGPEGLK	R	N	0.95	6.59	0.683	0	0	1	1	2	3309.61	415	445	FALSE	gi|356514615,gi|356564051,gi|356509819
	Glycine dehydrogenase (aminomethyl-transferring) / Glycine-cleavage complex P-protein [Glycine max]	gi|227305854,gi|356552354	NCBI_Gmax.fasta	114939	1	7	7	7	0.00302	0.418	DLSLCHSMIPLGSCTMK	K	L	0.95	3.86	0.534	0	2	0	0	2	1949.9	585	601	FALSE	gi|356514615,gi|356564051,gi|356509819
	Glycine dehydrogenase (aminomethyl-transferring) / Glycine-cleavage complex P-protein [Glycine max]	gi|227305854,gi|356552354	NCBI_Gmax.fasta	114939	1	7	7	7	0.00302	0.418	FDAGLTENQMIEHMK	K	D	0.95	3.53	0.458	0	1	0	0	2	1763.81	145	159	TRUE
	Glycine dehydrogenase (aminomethyl-transferring) / Glycine-cleavage complex P-protein [Glycine max]	gi|227305854,gi|356552354	NCBI_Gmax.fasta	114939	1	7	7	7	0.00302	0.418	FGVPMGYGGPHAAFLATSQEYKR	R	M	0.95	5.6	0.653	0	1	1	0	2	2484.21	360	382	FALSE	gi|356514615,gi|356564051,gi|356509819
	Glycine dehydrogenase (aminomethyl-transferring) / Glycine-cleavage complex P-protein [Glycine max]	gi|227305854,gi|356552354	NCBI_Gmax.fasta	114939	1	7	7	7	0.00302	0.418	GAPHPPSLLMADAWTKPYSR	K	E	0.95	3.75	0.568	0	0	1	0	2	2195.11	990	1009	TRUE
	Glycine dehydrogenase (aminomethyl-transferring) / Glycine-cleavage complex P-protein [Glycine max]	gi|227305854,gi|356552354	NCBI_Gmax.fasta	114939	1	7	7	7	0.00302	0.418	GVNGTVAHEFIIDLR	R	G	0.95	4.56	0.423	0	1	0	0	2	1640.88	897	911	FALSE	gi|356564051,gi|356509819
	Glycine dehydrogenase (aminomethyl-transferring) / Glycine-cleavage complex P-protein [Glycine max]	gi|227305854,gi|356552354	NCBI_Gmax.fasta	114939	1	7	7	7	0.00302	0.418	IAILNANYMAK	K	R	0.95	3.27	0.517	0	1	0	0	2	1221.67	875	885	FALSE	gi|356564051
	Glycine dehydrogenase (aminomethyl-transferring) / Glycine-cleavage complex P-protein [Glycine max]	gi|227305854,gi|356552354	NCBI_Gmax.fasta	114939	1	7	7	7	0.00302	0.418	KLGTVEIQDLPFFDTVK	K	V	0.95	4.57	0.563	0	1	0	0	2	1950.06	464	480	TRUE
	Glycine dehydrogenase (aminomethyl-transferring) / Glycine-cleavage complex P-protein [Glycine max]	gi|227305854,gi|356552354	NCBI_Gmax.fasta	114939	1	7	7	7	0.00302	0.418	KSPYLTHPIFNTYQTEHELLR	R	Y	0.95	4.76	0.579	0	0	1	0	2	2587.33	556	576	TRUE
	Glycine dehydrogenase (aminomethyl-transferring) / Glycine-cleavage complex P-protein [Glycine max]	gi|227305854,gi|356552354	NCBI_Gmax.fasta	114939	1	7	7	7	0.00302	0.418	LENYYPVLFR	R	G	0.95	1.93	0.315	0	1	0	0	2	1313.69	887	896	FALSE	gi|356564051
	Glycine dehydrogenase (aminomethyl-transferring) / Glycine-cleavage complex P-protein [Glycine max]	gi|227305854,gi|356552354	NCBI_Gmax.fasta	114939	1	7	7	7	0.00302	0.418	LGTVEIQDLPFFDTVK	K	V	0.95	3.96	0.504	0	1	0	0	2	1821.96	465	480	TRUE
	Glycine dehydrogenase (aminomethyl-transferring) / Glycine-cleavage complex P-protein [Glycine max]	gi|227305854,gi|356552354	NCBI_Gmax.fasta	114939	1	7	7	7	0.00302	0.418	MAESCGFGSLDSLVDATVPK	K	S	0.95	5.46	0.624	0	1	0	0	2	2083.97	114	133	TRUE
	Glycine dehydrogenase (aminomethyl-transferring) / Glycine-cleavage complex P-protein [Glycine max]	gi|227305854,gi|356552354	NCBI_Gmax.fasta	114939	1	7	7	7	0.00302	0.418	NIMENPAWYTQYTPYQAEISQGR	R	L	0.95	4.28	0.668	0	1	0	0	2	2760.27	188	210	FALSE	gi|356514615,gi|356564051,gi|356509819
	Glycine dehydrogenase (aminomethyl-transferring) / Glycine-cleavage complex P-protein [Glycine max]	gi|227305854,gi|356552354	NCBI_Gmax.fasta	114939	1	7	7	7	0.00302	0.418	NLICTLLPASQAVEEQAAATA	R	-	0.95	2.33	0.404	0	1	0	0	2	2171.1	1039	1059	FALSE	gi|356564051
	Glycine dehydrogenase (aminomethyl-transferring) / Glycine-cleavage complex P-protein [Glycine max]	gi|227305854,gi|356552354	NCBI_Gmax.fasta	114939	1	7	7	7	0.00302	0.418	NVCIIPVSAHGTNPASAAMCGMK	R	I	0.95	4.88	0.688	0	1	0	0	2	2386.11	682	704	FALSE	gi|356564051
	Glycine dehydrogenase (aminomethyl-transferring) / Glycine-cleavage complex P-protein [Glycine max]	gi|227305854,gi|356552354	NCBI_Gmax.fasta	114939	1	7	7	7	0.00302	0.418	RLENYYPVLFR	K	G	0.95	4.04	0.603	0	1	0	0	2	1469.79	886	896	FALSE	gi|356564051
	Glycine dehydrogenase (aminomethyl-transferring) / Glycine-cleavage complex P-protein [Glycine max]	gi|227305854,gi|356552354	NCBI_Gmax.fasta	114939	1	7	7	7	0.00302	0.418	SGDVCGVLVQYPGTEGEVLDYGEFVK	K	K	0.95	4.97	0.692	0	1	0	0	2	2817.33	296	321	FALSE	gi|356514615,gi|356564051
	Glycine dehydrogenase (aminomethyl-transferring) / Glycine-cleavage complex P-protein [Glycine max]	gi|227305854,gi|356552354	NCBI_Gmax.fasta	114939	1	7	7	7	0.00302	0.418	SGDVCGVLVQYPGTEGEVLDYGEFVKK	K	A	0.95	3.63	0.44	0	0	1	0	2	2945.42	296	322	FALSE	gi|356564051
	Glycine dehydrogenase (aminomethyl-transferring) / Glycine-cleavage complex P-protein [Glycine max]	gi|227305854,gi|356552354	NCBI_Gmax.fasta	114939	1	7	7	7	0.00302	0.418	SPYLTHPIFNTYQTEHELLR	K	Y	0.95	4.83	0.6	0	0	1	0	2	2459.24	557	576	TRUE
	Glycine dehydrogenase (aminomethyl-transferring) / Glycine-cleavage complex P-protein [Glycine max]	gi|227305854,gi|356552354	NCBI_Gmax.fasta	114939	1	7	7	7	0.00302	0.418	SYIGMGYYNTHVPPVILR	K	N	0.95	2.89	0.568	0	1	2	0	2	2080.07	170	187	FALSE	gi|356514615,gi|356564051,gi|356509819
	Glycine dehydrogenase (aminomethyl-transferring) / Glycine-cleavage complex P-protein [Glycine max]	gi|227305854,gi|356552354	NCBI_Gmax.fasta	114939	1	7	7	7	0.00302	0.418	TFCIPHGGGGPGMGPIGVK	K	K	0.95	2.84	0.472	0	2	0	0	2	1854.9	795	813	FALSE	gi|356514615,gi|356564051,gi|356509819
	Glycine dehydrogenase (aminomethyl-transferring) / Glycine-cleavage complex P-protein [Glycine max]	gi|227305854,gi|356552354	NCBI_Gmax.fasta	114939	1	7	7	7	0.00302	0.418	TFCIPHGGGGPGMGPIGVKK	K	H	0.95	3.3	0.606	0	2	1	0	2	1967	795	814	FALSE	gi|356514615,gi|356564051,gi|356509819
	Glycine dehydrogenase (aminomethyl-transferring) / Glycine-cleavage complex P-protein [Glycine max]	gi|227305854,gi|356552354	NCBI_Gmax.fasta	114939	1	7	7	7	0.00302	0.418	TFIIASNCHPQTIDICK	K	T	0.95	4.32	0.556	0	1	1	0	2	2017.98	258	274	FALSE	gi|356564051
	Glycine dehydrogenase (aminomethyl-transferring) / Glycine-cleavage complex P-protein [Glycine max]	gi|227305854,gi|356552354	NCBI_Gmax.fasta	114939	1	7	7	7	0.00302	0.418	TSNAHAIADAALK	K	S	0.95	2.37	0.271	0	1	0	0	2	1282.67	483	495	FALSE	gi|356564051
	Glycine dehydrogenase (aminomethyl-transferring) / Glycine-cleavage complex P-protein [Glycine max]	gi|227305854,gi|356552354	NCBI_Gmax.fasta	114939	1	7	7	7	0.00302	0.418	VHGLAGAFALGIKK	R	L	0.95	3.91	0.564	0	2	0	0	2	1381.83	451	464	FALSE	gi|356564051
	Glycine dehydrogenase (aminomethyl-transferring) / Glycine-cleavage complex P-protein [Glycine max]	gi|227305854,gi|356552354	NCBI_Gmax.fasta	114939	1	7	7	7	0.00302	0.418	VVDGNTITVAFDETTTLEDVDNLFK	R	V	0.95	4.29	0.588	0	1	0	0	2	2756.35	502	526	FALSE	gi|356514615,gi|356564051,gi|356509819
	Glycine dehydrogenase (aminomethyl-transferring) / Glycine-cleavage complex P-protein [Glycine max]	gi|227305854,gi|356552354	NCBI_Gmax.fasta	114939	1	7	7	7	0.00302	0.418	VVMASDLLALTVLKPPGEFGADIVVGSAQR	K	F	0.95	3.26	0.343	0	0	2	0	2	3069.67	330	359	FALSE	gi|356564051
	Glycine dehydrogenase (aminomethyl-transferring) / Glycine-cleavage complex P-protein [Glycine max]	gi|227305854,gi|356552354	NCBI_Gmax.fasta	114939	1	7	7	7	0.00302	0.418	VVTADLKDIDYK	K	S	0.95	3.21	0.536	0	1	0	0	2	1379.74	284	295	FALSE	gi|356564051
Protein 10	PROTEIN TAG-10, ISOFORM A [Glycine max]	gi|356518561	NCBI_Gmax.fasta	79931.6	1	7	7	7	0.00302	0.166	ASWTAVYSTQLESGLTQR	R	L	0.95	3.01	0.521	0	1	0	0	2	1997.99	202	219	TRUE
	PROTEIN TAG-10, ISOFORM A [Glycine max]	gi|356518561	NCBI_Gmax.fasta	79931.6	1	7	7	7	0.00302	0.166	DKPSVTPDGQYLLYVSSHENPGVPR	K	A	0.95	4.17	0.544	0	0	1	0	2	2755.37	177	201	TRUE
	PROTEIN TAG-10, ISOFORM A [Glycine max]	gi|356518561	NCBI_Gmax.fasta	79931.6	1	7	7	7	0.00302	0.166	FVGSFPVFSPSGDR	R	I	0.95	2.38	0.382	0	1	0	0	2	1498.73	426	439	TRUE
	PROTEIN TAG-10, ISOFORM A [Glycine max]	gi|356518561	NCBI_Gmax.fasta	79931.6	1	7	7	7	0.00302	0.166	GQDHWWSIYR	R	A	0.95	2.96	0.614	0	1	0	0	2	1347.62	295	304	TRUE
	PROTEIN TAG-10, ISOFORM A [Glycine max]	gi|356518561	NCBI_Gmax.fasta	79931.6	1	7	7	7	0.00302	0.166	IVEHGGWPTWVDDR	K	T	0.95	4.02	0.41	0	1	0	0	2	1666.8	274	287	TRUE
	PROTEIN TAG-10, ISOFORM A [Glycine max]	gi|356518561	NCBI_Gmax.fasta	79931.6	1	7	7	7	0.00302	0.166	NLYIMDAVDGEKK	K	E	0.95	3.09	0.273	0	1	0	0	2	1495.75	540	552	TRUE
	PROTEIN TAG-10, ISOFORM A [Glycine max]	gi|356518561	NCBI_Gmax.fasta	79931.6	1	7	7	7	0.00302	0.166	VTPPGLHAFTPATSPGNNNFIAVATR	R	R	0.95	3.97	0.396	0	0	1	0	2	2650.37	323	348	TRUE
Protein 11	CYSTEINE PROTEASE FAMILY C1-RELATED [Glycine max]	gi|257631758,gi|356564154	NCBI_Gmax.fasta	52116.1	1	5	6	6	0.00259	0.166	AVANQPVSVAIEGGGR	K	E	0.95	4.04	0.635	0	1	0	0	2	1524.81	272	287	TRUE
	CYSTEINE PROTEASE FAMILY C1-RELATED [Glycine max]	gi|257631758,gi|356564154	NCBI_Gmax.fasta	52116.1	1	5	6	6	0.00259	0.166	CGIAIEPSYPLK	K	N	0.95	2.54	0.226	0	1	0	0	2	1347.7	353	364	TRUE
	CYSTEINE PROTEASE FAMILY C1-RELATED [Glycine max]	gi|257631758,gi|356564154	NCBI_Gmax.fasta	52116.1	1	5	6	6	0.00259	0.166	CGTALDHGVVAVGYGTAK	R	G	0.95	4.6	0.624	0	1	0	0	2	1775.87	301	318	TRUE
	CYSTEINE PROTEASE FAMILY C1-RELATED [Glycine max]	gi|257631758,gi|356564154	NCBI_Gmax.fasta	52116.1	1	5	6	6	0.00259	0.166	EFQLYVSGVFTGR	R	C	0.95	3.61	0.569	0	1	0	0	2	1502.76	288	300	TRUE
	CYSTEINE PROTEASE FAMILY C1-RELATED [Glycine max]	gi|257631758,gi|356564154	NCBI_Gmax.fasta	52116.1	1	5	6	6	0.00259	0.166	VVSIDDYEDVPAYDELALKK	K	A	0.95	3.24	0.406	0	1	1	0	2	2282.14	252	271	TRUE
Protein 12	NADP-dependent malic enzyme-like [Glycine max]	gi|356558908	NCBI_Gmax.fasta	65196.2	1	6	6	6	0.00259	0.149	AIFASGSPFDPVEYK	R	G	0.95	3.19	0.524	0	1	0	0	2	1627.8	467	481	TRUE
	NADP-dependent malic enzyme-like [Glycine max]	gi|356558908	NCBI_Gmax.fasta	65196.2	1	6	6	6	0.00259	0.149	ILGLGDLGCQGMGIPVGK	R	L	0.95	2.86	0.35	0	1	0	0	2	1784.94	193	210	TRUE
	NADP-dependent malic enzyme-like [Glycine max]	gi|356558908	NCBI_Gmax.fasta	65196.2	1	6	6	6	0.00259	0.149	SIQVIVVTDGER	R	I	0.95	2.25	0.474	0	1	0	0	2	1315.72	181	192	TRUE
	NADP-dependent malic enzyme-like [Glycine max]	gi|356558908	NCBI_Gmax.fasta	65196.2	1	6	6	6	0.00259	0.149	VHDDMLLAASEALAK	R	L	0.95	4.63	0.584	0	1	0	0	2	1583.81	511	525	TRUE
	NADP-dependent malic enzyme-like [Glycine max]	gi|356558908	NCBI_Gmax.fasta	65196.2	1	6	6	6	0.00259	0.149	VIKPTVLIGSSGVGK	K	T	0.95	2.91	0.479	0	1	0	0	2	1454.89	409	423	TRUE
	NADP-dependent malic enzyme-like [Glycine max]	gi|356558908	NCBI_Gmax.fasta	65196.2	1	6	6	6	0.00259	0.149	YQAMMELQETNER	K	L	0.95	3.56	0.573	0	1	0	0	2	1642.72	109	121	TRUE
Protein 13	Peroxidase / Lactoperoxidase [Glycine max]	gi|219905899,gi|219914348,gi|255638280,gi|257644564,gi|257651563,gi|358249064	NCBI_Gmax.fasta	38106.4	1	5	5	5	0.00216	0.223	GFDATDVVALSGAHTYGR	R	A	0.95	4.52	0.599	0	1	0	0	2	1836.89	185	202	TRUE
	Peroxidase / Lactoperoxidase [Glycine max]	gi|219905899,gi|219914348,gi|255638280,gi|257644564,gi|257651563,gi|358249064	NCBI_Gmax.fasta	38106.4	1	5	5	5	0.00216	0.223	QCLPVVSCSDILVIAAR	K	E	0.95	3.57	0.522	0	1	0	0	2	1901	120	136	TRUE
	Peroxidase / Lactoperoxidase [Glycine max]	gi|219905899,gi|219914348,gi|255638280,gi|257644564,gi|257651563,gi|358249064	NCBI_Gmax.fasta	38106.4	1	5	5	5	0.00216	0.223	QEAIDAIENLR	R	V	0.95	1.99	0.394	0	1	0	0	2	1271.66	104	114	TRUE
	Peroxidase / Lactoperoxidase [Glycine max]	gi|219905899,gi|219914348,gi|255638280,gi|257644564,gi|257651563,gi|358249064	NCBI_Gmax.fasta	38106.4	1	5	5	5	0.00216	0.223	QGVFTSDQDIAGSPK	R	T	0.95	2.81	0.403	0	1	0	0	2	1549.75	262	276	TRUE
	Peroxidase / Lactoperoxidase [Glycine max]	gi|219905899,gi|219914348,gi|255638280,gi|257644564,gi|257651563,gi|358249064	NCBI_Gmax.fasta	38106.4	1	5	5	5	0.00216	0.223	TPVKFDNMYYINLLNR	R	Q	0.95	4.78	0.663	0	1	0	0	2	2001.03	246	261	TRUE
Protein 14	Serine/threonine kinase receptor-associated protein // WD40 repeat protein [Glycine max]	gi|571514185	NCBI_Gmax.fasta	78562.6	1	4	5	5	0.00216	0.0986	AAFAVQGLDTTDLVALSGAHSFGR	K	V	0.95	5.45	0.696	0	1	1	0	2	2404.23	174	197	TRUE
	Serine/threonine kinase receptor-associated protein // WD40 repeat protein [Glycine max]	gi|571514185	NCBI_Gmax.fasta	78562.6	1	4	5	5	0.00216	0.0986	FSSDQIAFFK	K	S	0.95	2.31	0.424	0	1	0	0	2	1189.59	288	297	TRUE
	Serine/threonine kinase receptor-associated protein // WD40 repeat protein [Glycine max]	gi|571514185	NCBI_Gmax.fasta	78562.6	1	4	5	5	0.00216	0.0986	GLDVVNQIKTELEK	R	A	0.95	4.55	0.382	0	1	0	0	2	1585.88	100	113	TRUE
	Serine/threonine kinase receptor-associated protein // WD40 repeat protein [Glycine max]	gi|571514185	NCBI_Gmax.fasta	78562.6	1	4	5	5	0.00216	0.0986	GLLQSDQELFSTPGADTISIVNK	K	F	0.95	5.16	0.624	0	1	0	0	2	2433.25	265	287	TRUE
Protein 15	GLUTAMINE SYNTHETASE [Glycine max]	gi|255645255,gi|363807092	NCBI_Gmax.fasta	39153.8	1	4	4	5	0.00216	0.199	HETADINTFLWGVANR	R	G	0.95	5.38	0.507	0	1	0	0	2	1843.91	296	311	TRUE	gi|298532538,gi|298556684,gi|351722651,gi|256143,gi|255645187,gi|121336,gi|571486515,gi|10946357
	GLUTAMINE SYNTHETASE [Glycine max]	gi|255645255,gi|363807092	NCBI_Gmax.fasta	39153.8	1	4	4	5	0.00216	0.199	TLPGPVSDPSKLPK	R	W	0.95	2.14	0.484	0	1	0	0	2	1435.82	39	52	TRUE
	GLUTAMINE SYNTHETASE [Glycine max]	gi|255645255,gi|363807092	NCBI_Gmax.fasta	39153.8	1	4	4	5	0.00216	0.199	VFSHPDVVAEETWYGIEQEYTLLQK	K	D	0.95	4.59	0.514	0	0	1	0	2	2981.46	113	137	TRUE
	GLUTAMINE SYNTHETASE [Glycine max]	gi|255645255,gi|363807092	NCBI_Gmax.fasta	39153.8	1	4	4	5	0.00216	0.199	VIAEYIWIGGSGMDLR	K	S	0.95	5.05	0.322	0	2	0	0	2	1779.91	19	34	TRUE	gi|298532538,gi|298556684,gi|351722651,gi|256143,gi|255645187,gi|121336,gi|571486515,gi|10946357
Protein 16	Enolase-like [Glycine max]	gi|356505318	NCBI_Gmax.fasta	47658.7	1	5	5	5	0.00216	0.171	AAVPSGASTGIYEALELR	R	D	0.95	3.49	0.513	0	1	0	0	2	1804.94	35	52	TRUE
	Enolase-like [Glycine max]	gi|356505318	NCBI_Gmax.fasta	47658.7	1	5	5	5	0.00216	0.171	ISGDALKDLYK	K	S	0.95	2.85	0.295	0	1	0	0	2	1222.67	278	288	TRUE
	Enolase-like [Glycine max]	gi|356505318	NCBI_Gmax.fasta	47658.7	1	5	5	5	0.00216	0.171	LAMQEFMVLPVGASSFK	K	E	0.95	4.3	0.545	0	1	0	0	2	1854.95	168	184	TRUE
	Enolase-like [Glycine max]	gi|356505318	NCBI_Gmax.fasta	47658.7	1	5	5	5	0.00216	0.171	LGANAILAVSLAVCK	K	A	0.95	4.2	0.594	0	1	0	0	2	1499.86	111	125	TRUE
	Enolase-like [Glycine max]	gi|356505318	NCBI_Gmax.fasta	47658.7	1	5	5	5	0.00216	0.171	VNQIGSVTESIEAVR	K	M	0.95	3.33	0.474	0	1	0	0	2	1601.85	353	367	TRUE
Protein 17	ATP synthase subunit alpha, mitochondrial H(+)-transporting two-sector ATPase / Mitochondrial ATPase [Glycine max]	gi|231585,gi|403311569,gi|403311573,gi|403311579,gi|476507691,gi|476507695,gi|476507701	NCBI_Gmax.fasta	55332.1	1	5	5	5	0.00216	0.156	ATSESETLYCVYVAIGQK	R	R	0.95	3.85	0.547	0	1	0	0	2	2018.97	195	212	TRUE
	ATP synthase subunit alpha, mitochondrial H(+)-transporting two-sector ATPase / Mitochondrial ATPase [Glycine max]	gi|231585,gi|403311569,gi|403311573,gi|403311579,gi|476507691,gi|476507695,gi|476507701	NCBI_Gmax.fasta	55332.1	1	5	5	5	0.00216	0.156	DILTTIKPELLQSLK	R	G	0.95	3.51	0.538	0	1	0	0	2	1712.02	470	484	TRUE
	ATP synthase subunit alpha, mitochondrial H(+)-transporting two-sector ATPase / Mitochondrial ATPase [Glycine max]	gi|231585,gi|403311569,gi|403311573,gi|403311579,gi|476507691,gi|476507695,gi|476507701	NCBI_Gmax.fasta	55332.1	1	5	5	5	0.00216	0.156	DNGMHALIIYDDLSK	R	Q	0.95	3.53	0.452	0	1	0	0	2	1704.83	262	276	TRUE
	ATP synthase subunit alpha, mitochondrial H(+)-transporting two-sector ATPase / Mitochondrial ATPase [Glycine max]	gi|231585,gi|403311569,gi|403311573,gi|403311579,gi|476507691,gi|476507695,gi|476507701	NCBI_Gmax.fasta	55332.1	1	5	5	5	0.00216	0.156	GIRPAINVGLSVSR	R	V	0.95	3.24	0.538	0	1	0	0	2	1438.85	363	376	TRUE
	ATP synthase subunit alpha, mitochondrial H(+)-transporting two-sector ATPase / Mitochondrial ATPase [Glycine max]	gi|231585,gi|403311569,gi|403311573,gi|403311579,gi|476507691,gi|476507695,gi|476507701	NCBI_Gmax.fasta	55332.1	1	5	5	5	0.00216	0.156	LTEVLKQPQYAPLPIEK	R	Q	0.95	3.81	0.557	0	1	0	0	2	1967.12	427	443	TRUE
Protein 18	NADPH-specific isocitrate dehydrogenase, partial [Glycine max]	gi|169989,gi|1708401,gi|571437947,gi|571437949,gi|571437951,gi|571511945	NCBI_Gmax.fasta	43864.9	1	5	5	5	0.00216	0.154	DLALILHGSK	K	L	0.95	2.71	0.447	0	1	0	0	2	1066.63	358	367	TRUE
	NADPH-specific isocitrate dehydrogenase, partial [Glycine max]	gi|169989,gi|1708401,gi|571437947,gi|571437949,gi|571437951,gi|571511945	NCBI_Gmax.fasta	43864.9	1	5	5	5	0.00216	0.154	FKDIFQEVYEASWK	R	S	0.95	4.93	0.547	0	1	0	0	2	1789.88	206	219	TRUE
	NADPH-specific isocitrate dehydrogenase, partial [Glycine max]	gi|169989,gi|1708401,gi|571437947,gi|571437949,gi|571437951,gi|571511945	NCBI_Gmax.fasta	43864.9	1	5	5	5	0.00216	0.154	GGETSTNSIASIFAWTR	K	G	0.95	3.44	0.443	0	1	0	0	2	1797.88	305	321	TRUE
	NADPH-specific isocitrate dehydrogenase, partial [Glycine max]	gi|169989,gi|1708401,gi|571437947,gi|571437949,gi|571437951,gi|571511945	NCBI_Gmax.fasta	43864.9	1	5	5	5	0.00216	0.154	SFAEASMATALEKK	R	W	0.95	3.28	0.404	0	1	0	0	2	1483.75	174	187	TRUE
	NADPH-specific isocitrate dehydrogenase, partial [Glycine max]	gi|169989,gi|1708401,gi|571437947,gi|571437949,gi|571437951,gi|571511945	NCBI_Gmax.fasta	43864.9	1	5	5	5	0.00216	0.154	SKFEAAGIWYEHR	K	L	0.95	3.89	0.475	0	1	0	0	2	1593.78	220	232	TRUE
Protein 19	Kunitz trypsin inhibitor p20-1-like protein [Glycine max]	gi|168259026,gi|255633066,gi|351720672,gi|351721282,gi|351723751,gi|5381209	NCBI_Gmax.fasta	22674.4	1	3	3	4	0.00172	0.251	EGNRPLIVTHDQNHPLLVQFQK	R	V	0.95	4.31	0.367	0	0	0	1	2	2583.38	177	198	TRUE
	Kunitz trypsin inhibitor p20-1-like protein [Glycine max]	gi|168259026,gi|255633066,gi|351720672,gi|351721282,gi|351723751,gi|5381209	NCBI_Gmax.fasta	22674.4	1	3	3	4	0.00172	0.251	GLPLIISSPFK	K	I	0.95	2.47	0.565	0	1	0	0	2	1171.71	79	89	TRUE
	Kunitz trypsin inhibitor p20-1-like protein [Glycine max]	gi|168259026,gi|255633066,gi|351720672,gi|351721282,gi|351723751,gi|5381209	NCBI_Gmax.fasta	22674.4	1	3	3	4	0.00172	0.251	TETETCPLTVVQSPFEVSK	K	G	0.95	4.88	0.579	0	1	0	0	2	2152.05	60	78	TRUE
Protein 20	Elongation factor 1-alpha; Short=EF-1-alpha [Glycine max]	gi|1352345,gi|257717332,gi|257717372,gi|351734546,gi|571531942	NCBI_Gmax.fasta	49397.8	1	4	4	4	0.00172	0.161	EHALLSFTLGVK	R	Q	0.95	2.56	0.535	0	1	0	0	2	1314.74	135	146	TRUE
	Elongation factor 1-alpha; Short=EF-1-alpha [Glycine max]	gi|1352345,gi|257717332,gi|257717372,gi|351734546,gi|571531942	NCBI_Gmax.fasta	49397.8	1	4	4	4	0.00172	0.161	NMITGTSQADCAVLIIDSTTGGFEAGISK	K	D	0.95	4.25	0.677	0	1	0	0	2	2957.42	101	129	TRUE	gi|356558809,gi|257717336
	Elongation factor 1-alpha; Short=EF-1-alpha [Glycine max]	gi|1352345,gi|257717332,gi|257717372,gi|351734546,gi|571531942	NCBI_Gmax.fasta	49397.8	1	4	4	4	0.00172	0.161	VHISIVVIGHVDSGK	K	S	0.95	4.89	0.716	0	1	0	0	2	1559.89	6	20	TRUE
	Elongation factor 1-alpha; Short=EF-1-alpha [Glycine max]	gi|1352345,gi|257717332,gi|257717372,gi|351734546,gi|571531942	NCBI_Gmax.fasta	49397.8	1	4	4	4	0.00172	0.161	YYCTVIDAPGHRDFIK	K	N	0.95	2.49	0.306	0	0	1	0	2	1954.95	85	100	TRUE	gi|356558809,gi|257717336
Protein 21	ATP SYNTHASE SUBUNIT BETA-1, MITOCHONDRIAL-RELATED [Glycine max]	gi|227303916,gi|356536246	NCBI_Gmax.fasta	59836.9	1	4	4	4	0.00172	0.106	FTQANSEVSALLGR	R	I	0.95	4.35	0.566	0	1	0	0	2	1492.78	340	353	TRUE
	ATP SYNTHASE SUBUNIT BETA-1, MITOCHONDRIAL-RELATED [Glycine max]	gi|227303916,gi|356536246	NCBI_Gmax.fasta	59836.9	1	4	4	4	0.00172	0.106	GAIGQVCQVIGAVVDVR	K	F	0.95	4.4	0.502	0	1	0	0	2	1740.94	85	101	TRUE
	ATP SYNTHASE SUBUNIT BETA-1, MITOCHONDRIAL-RELATED [Glycine max]	gi|227303916,gi|356536246	NCBI_Gmax.fasta	59836.9	1	4	4	4	0.00172	0.106	LVLEVAQHLGEGVVR	R	T	0.95	4.19	0.56	0	1	0	0	2	1618.93	122	136	TRUE
	ATP SYNTHASE SUBUNIT BETA-1, MITOCHONDRIAL-RELATED [Glycine max]	gi|227303916,gi|356536246	NCBI_Gmax.fasta	59836.9	1	4	4	4	0.00172	0.106	VGLTGLTVAEHFR	R	D	0.95	3.54	0.487	0	1	0	0	2	1399.77	311	323	TRUE
Protein 22	Methylmalonate-semialdehyde dehydrogenase [acylating], mitochondrial-like [Glycine max]	gi|356521227,gi|356524788,gi|571470223	NCBI_Gmax.fasta	46078.5	1	4	4	4	0.00172	0.101	AGVNFYTQIK	K	T	0.95	2.67	0.315	0	1	0	0	2	1140.6	397	406	TRUE
	Methylmalonate-semialdehyde dehydrogenase [acylating], mitochondrial-like [Glycine max]	gi|356521227,gi|356524788,gi|571470223	NCBI_Gmax.fasta	46078.5	1	4	4	4	0.00172	0.101	ASFAGDLNFYGK	K	A	0.95	2.27	0.4	0	1	0	0	2	1289.62	385	396	TRUE
	Methylmalonate-semialdehyde dehydrogenase [acylating], mitochondrial-like [Glycine max]	gi|356521227,gi|356524788,gi|571470223	NCBI_Gmax.fasta	46078.5	1	4	4	4	0.00172	0.101	DMDKLALNVTTEQGK	R	T	0.95	3.75	0.439	0	1	0	0	2	1662.84	11	25	TRUE
	Methylmalonate-semialdehyde dehydrogenase [acylating], mitochondrial-like [Glycine max]	gi|356521227,gi|356524788,gi|571470223	NCBI_Gmax.fasta	46078.5	1	4	4	4	0.00172	0.101	VNAGTEPDTDLGPVISK	K	Q	0.95	4.27	0.504	0	1	0	0	2	1712.87	241	257	TRUE
Protein 23	Glutathione S-transferase GST [Glycine max]	gi|351726820	NCBI_Gmax.fasta	25852.4	1	3	4	4	0.00172	0.182	ESLPPRDPVFSFFK	K	G	0.95	2.54	0.267	0	1	0	0	2	1665.86	202	215	TRUE
	Glutathione S-transferase GST [Glycine max]	gi|351726820	NCBI_Gmax.fasta	25852.4	1	3	4	4	0.00172	0.182	LHNWSQEFLNHPIVK	K	E	0.95	3.57	0.679	0	1	1	0	2	1861.97	187	201	TRUE
	Glutathione S-transferase GST [Glycine max]	gi|351726820	NCBI_Gmax.fasta	25852.4	1	3	4	4	0.00172	0.182	NNPILPSDPYQR	K	A	0.95	2.26	0.284	0	1	0	0	2	1413.71	83	94	TRUE
	Glutathione S-transferase GST [Glycine max]	gi|255647989,gi|356539207,gi|359807022	NCBI_Gmax.fasta	39143.2	0.998	2	2	2	0.000862	0.075	EYFEIPWASLR	K	G	0.95	2.45	0.451	0	1	0	0	2	1410.71	35	45	TRUE
	Glutathione S-transferase GST [Glycine max]	gi|255647989,gi|356539207,gi|359807022	NCBI_Gmax.fasta	39143.2	0.998	2	2	2	0.000862	0.075	SNIFAIGDITDVQEIK	K	Q	0.95	4.19	0.554	0	1	0	0	2	1762.92	257	272	TRUE
	Glutathione S-transferase GST [Glycine max]	gi|255648242,gi|255648263,gi|356543373,gi|359806310	NCBI_Gmax.fasta	47469.3	0.998	2	2	2	0.000862	0.0716	SFTSEFPHVER	K	Y	0.95	3.15	0.537	0	1	0	0	2	1335.63	178	188	TRUE
	Glutathione S-transferase GST [Glycine max]	gi|255648242,gi|255648263,gi|356543373,gi|359806310	NCBI_Gmax.fasta	47469.3	0.998	2	2	2	0.000862	0.0716	VPVLETPDGPVFESNAIAR	K	Y	0.95	3.95	0.629	0	1	0	0	2	2011.05	54	72	TRUE
Protein 24	Tubulin beta-4 chain-like [Glycine max]	gi|356511255,gi|356513395,gi|356517897,gi|356528292,gi|356533102,gi|356535873,gi|356555918,gi|356571899,gi|356575969,gi|571470046,gi|571470409	NCBI_Gmax.fasta	50007.3	0.998	2	2	3	0.00129	0.0539	LAVNLIPFPR	K	L	0.95	2.96	0.558	0	1	0	0	2	1139.69	253	262	TRUE
	Tubulin beta-4 chain-like [Glycine max]	gi|356511255,gi|356513395,gi|356517897,gi|356528292,gi|356533102,gi|356535873,gi|356555918,gi|356571899,gi|356575969,gi|571470046,gi|571470409	NCBI_Gmax.fasta	50007.3	0.998	2	2	3	0.00129	0.0539	LHFFMVGFAPLTSR	R	G	0.95	3.91	0.624	0	2	0	0	2	1622.85	263	276	TRUE
Protein 25	6-phosphogluconate dehydrogenase [Glycine max]	gi|2529229,gi|298547957,gi|351722265,gi|356526581,gi|571541760	NCBI_Gmax.fasta	56375.5	0.998	2	2	3	0.00129	0.0646	IGLAGLAVMGQNLALNIAEK	G	G	0.95	4.67	0.613	0	1	0	0	2	2012.12	8	27	TRUE
	6-phosphogluconate dehydrogenase [Glycine max]	gi|2529229,gi|298547957,gi|351722265,gi|356526581,gi|571541760	NCBI_Gmax.fasta	56375.5	0.998	2	2	3	0.00129	0.0646	VDIEGSYHTEWFK	R	L	0.95	3.11	0.444	0	1	0	0	2	1610.75	467	479	TRUE
Protein 26	Malate dehydrogenase / Malic dehydrogenase [Glycine max]	gi|257645254,gi|257700462,gi|257700464,gi|257700504,gi|351727793,gi|366985127,gi|373432589,gi|42521311	NCBI_Gmax.fasta	35467.6	1	3	3	3	0.00129	0.145	MELVDAAFPLLK	K	G	0.95	2.79	0.431	0	1	0	0	2	1346.74	56	67	TRUE
	Malate dehydrogenase / Malic dehydrogenase [Glycine max]	gi|257645254,gi|257700462,gi|257700464,gi|257700504,gi|351727793,gi|366985127,gi|373432589,gi|42521311	NCBI_Gmax.fasta	35467.6	1	3	3	3	0.00129	0.145	VLVTGAAGQIGYALVPMIAR	R	G	0.95	2.8	0.474	0	1	0	0	2	2000.14	8	27	TRUE
	Malate dehydrogenase / Malic dehydrogenase [Glycine max]	gi|257645254,gi|257700462,gi|257700464,gi|257700504,gi|351727793,gi|366985127,gi|373432589,gi|42521311	NCBI_Gmax.fasta	35467.6	1	3	3	3	0.00129	0.145	VLVVANPANTNALILK	K	E	0.95	2.23	0.359	0	1	0	0	2	1649.99	127	142	TRUE
Protein 27	Pathogenesis-related protein Bet v I family (Bet_v_1) [Glycine max]	gi|255627117,gi|351726098	NCBI_Gmax.fasta	17762.1	1	3	3	3	0.00129	0.438	FIFQAIDDNDHGGTIIK	K	W	0.95	3.72	0.528	0	1	0	0	2	1903.96	101	117	TRUE
	Pathogenesis-related protein Bet v I family (Bet_v_1) [Glycine max]	gi|255627117,gi|351726098	NCBI_Gmax.fasta	17762.1	1	3	3	3	0.00129	0.438	ITTEIGVHATATK	K	W	0.95	3.58	0.604	0	1	0	0	2	1341.74	7	19	TRUE
	Pathogenesis-related protein Bet v I family (Bet_v_1) [Glycine max]	gi|255627117,gi|351726098	NCBI_Gmax.fasta	17762.1	1	3	3	3	0.00129	0.438	LFSGDIDHNYKNFK	K	F	0.95	3.31	0.511	0	1	0	0	2	1697.83	87	100	TRUE
	Pathogenesis-related protein Bet v I family (Bet_v_1) [Glycine max]	gi|255627117,gi|351726098	NCBI_Gmax.fasta	17762.1	1	3	3	3	0.00129	0.438	WFNLFATQLHHVQNLTDR	K	V	0.95	4.92	0.6	0	1	1	0	2	2240.14	20	37	FALSE	gi|152942813
	Pathogenesis-related protein Bet v I family (Bet_v_1) [Glycine max]	gi|255627117,gi|351726098	NCBI_Gmax.fasta	17762.1	1	3	3	3	0.00129	0.438	WFNLFATQLHHVQNLTDRVHGTK	K	L	0.95	4.11	0.487	0	0	1	0	2	2762.43	20	42	FALSE	gi|152942813
Protein 28	Dihydrolipoyllysine-residue succinyltransferase component of 2-oxoglutarate dehydrogenase complex 2, mitochondrial-like [Glycine max]	gi|356501546,gi|356552986,gi|571506582	NCBI_Gmax.fasta	49864.2	1	3	3	3	0.00129	0.0948	GLVVPVIR	K	N	0.95	1.49	0.547	0	1	0	0	2	852.567	334	341	TRUE
	Dihydrolipoyllysine-residue succinyltransferase component of 2-oxoglutarate dehydrogenase complex 2, mitochondrial-like [Glycine max]	gi|356501546,gi|356552986,gi|571506582	NCBI_Gmax.fasta	49864.2	1	3	3	3	0.00129	0.0948	LKDSQNTFAMLTTFNEVDMTNLMK	R	L	0.95	4.61	0.538	0	0	1	0	2	2792.33	248	271	TRUE
	Dihydrolipoyllysine-residue succinyltransferase component of 2-oxoglutarate dehydrogenase complex 2, mitochondrial-like [Glycine max]	gi|356501546,gi|356552986,gi|571506582	NCBI_Gmax.fasta	49864.2	1	3	3	3	0.00129	0.0948	NADTMNFADIEK	R	Q	0.95	2.66	0.459	0	1	0	0	2	1368.61	342	353	TRUE
Protein 29	ALCOHOL DEHYDROGENASE-RELATED [Glycine max]	gi|255642483,gi|257296321,gi|257354006,gi|257659779,gi|257680422,gi|257680444,gi|257716353,gi|257728196,gi|257728218,gi|363807024	NCBI_Gmax.fasta	36125.8	1	3	3	3	0.00129	0.145	DVANAHIQAYEIASASGR	K	Y	0.95	5.3	0.522	0	1	0	0	2	1872.92	232	249	TRUE
	ALCOHOL DEHYDROGENASE-RELATED [Glycine max]	gi|255642483,gi|257296321,gi|257354006,gi|257659779,gi|257680422,gi|257680444,gi|257716353,gi|257728196,gi|257728218,gi|363807024	NCBI_Gmax.fasta	36125.8	1	3	3	3	0.00129	0.145	SADDKPYVPTFQVSK	K	E	0.95	2.61	0.368	0	1	0	0	2	1681.84	279	293	TRUE
	ALCOHOL DEHYDROGENASE-RELATED [Glycine max]	gi|255642483,gi|257296321,gi|257354006,gi|257659779,gi|257680422,gi|257680444,gi|257716353,gi|257728196,gi|257728218,gi|363807024	NCBI_Gmax.fasta	36125.8	1	3	3	3	0.00129	0.145	VILTSSVAAVAYNK	R	R	0.95	3.02	0.589	0	1	0	0	2	1435.82	124	137	TRUE
Protein 30	Eukaryotic initiation factor 4A-15-like isoformX2 [Glycine max]	gi|356530403,gi|571476624,gi|571504658,gi|571514059,gi|571514063,gi|571514068,gi|571540128	NCBI_Gmax.fasta	52046	1	3	3	3	0.00129	0.102	GFKDQIYDIFQLLPSK	R	I	0.95	4.3	0.579	0	1	0	0	2	1912.02	242	257	TRUE
	Eukaryotic initiation factor 4A-15-like isoformX2 [Glycine max]	gi|356530403,gi|571476624,gi|571504658,gi|571514059,gi|571514063,gi|571514068,gi|571540128	NCBI_Gmax.fasta	52046	1	3	3	3	0.00129	0.102	GIYAYGFEKPSAIQQR	R	G	0.95	3.66	0.368	0	1	0	0	2	1827.94	98	113	TRUE
	Eukaryotic initiation factor 4A-15-like isoformX2 [Glycine max]	gi|356530403,gi|571476624,gi|571504658,gi|571514059,gi|571514063,gi|571514068,gi|571540128	NCBI_Gmax.fasta	52046	1	3	3	3	0.00129	0.102	VLITTDLLAR	R	G	0.95	2.44	0.484	0	1	0	0	2	1114.68	376	385	TRUE
Protein 31	ADP,ATP carrier protein 1, mitochondrial [Glycine max]	gi|356525661	NCBI_Gmax.fasta	42003.9	0.999	3	3	3	0.00129	0.0825	AVAGAGVLAGYDKLQVLVFGK	R	K	0.95	4.44	0.548	0	2	0	0	2	2076.19	361	381	TRUE
	ADP,ATP carrier protein 1, mitochondrial [Glycine max]	gi|356525661	NCBI_Gmax.fasta	42003.9	0.999	3	3	3	0.00129	0.0825	SSLDAFTQILK	K	N	0.95	2.13	0.414	0	1	0	0	2	1222.67	333	343	TRUE
Protein 32	Germin-like protein 1 [Glycine max]	gi|196122046,gi|219522380,gi|255638668,gi|257633890,gi|351723525,gi|571443377	NCBI_Gmax.fasta	22846.6	1	3	3	3	0.00129	0.188	IDYAPGGINPPHTHPR	R	A	0.95	2.57	0.565	0	1	0	0	2	1741.88	97	112	TRUE
	Germin-like protein 1 [Glycine max]	gi|196122046,gi|219522380,gi|255638668,gi|257633890,gi|351723525,gi|571443377	NCBI_Gmax.fasta	22846.6	1	3	3	3	0.00129	0.188	IPGLNTLGVSLSR	K	I	0.95	2.99	0.549	0	1	0	0	2	1326.77	84	96	TRUE
	Germin-like protein 1 [Glycine max]	gi|196122046,gi|219522380,gi|255638668,gi|257633890,gi|351723525,gi|571443377	NCBI_Gmax.fasta	22846.6	1	3	3	3	0.00129	0.188	SISKGEIFVFPK	K	G	0.95	2.52	0.369	0	1	0	0	2	1351.76	139	150	TRUE
Protein 33	NAD(P)H dehydrogenase (quinone) / Vitamin-K reductase [Glycine max]	gi|257652451,gi|257689839,gi|257689927,gi|257689933,gi|351727803,gi|356554929,gi|571516470	NCBI_Gmax.fasta	21667.1	1	3	3	3	0.00129	0.217	LWQVPETLPEEVLAK	K	L	0.95	2.96	0.37	0	1	0	0	2	1751.96	37	51	TRUE
	NAD(P)H dehydrogenase (quinone) / Vitamin-K reductase [Glycine max]	gi|257652451,gi|257689839,gi|257689927,gi|257689933,gi|351727803,gi|356554929,gi|571516470	NCBI_Gmax.fasta	21667.1	1	3	3	3	0.00129	0.217	QPSELELAQAFHQGK	R	Y	0.95	2.22	0.346	0	1	0	0	2	1682.85	176	190	TRUE
	NAD(P)H dehydrogenase (quinone) / Vitamin-K reductase [Glycine max]	gi|257652451,gi|257689839,gi|257689927,gi|257689933,gi|351727803,gi|356554929,gi|571516470	NCBI_Gmax.fasta	21667.1	1	3	3	3	0.00129	0.217	VYIVYYSTYGHVEK	K	L	0.95	4.17	0.514	0	1	0	0	2	1720.86	5	18	TRUE
Protein 34	Tubulin A isoform X1 [Glycine max]	gi|571453349,gi|571469104	NCBI_Gmax.fasta	46898.5	1	3	3	3	0.00129	0.1	AVFVDLEPTVIDEVR	R	C	0.95	3.23	0.539	0	1	0	0	2	1701.91	65	79	TRUE
	Tubulin A isoform X1 [Glycine max]	gi|571453349,gi|571469104	NCBI_Gmax.fasta	46898.5	1	3	3	3	0.00129	0.1	IHFMLSSYAPVISAAK	R	A	0.95	4.39	0.513	0	1	0	0	2	1750.92	265	280	TRUE
	Tubulin A isoform X1 [Glycine max]	gi|571453349,gi|571469104	NCBI_Gmax.fasta	46898.5	1	3	3	3	0.00129	0.1	SLDIERPTYTNLNR	R	L	0.95	3.1	0.26	0	1	0	0	2	1691.87	216	229	TRUE
Protein 35	PEROXIDASE 35-RELATED [Glycine max]	gi|219914338,gi|255637875,gi|257651553,gi|356563537	NCBI_Gmax.fasta	35524	1	3	3	3	0.00129	0.114	GLFTSDQILFTDPR	K	S	0.95	2.62	0.397	0	1	0	0	2	1609.82	266	279	TRUE
	PEROXIDASE 35-RELATED [Glycine max]	gi|219914338,gi|255637875,gi|257651553,gi|356563537	NCBI_Gmax.fasta	35524	1	3	3	3	0.00129	0.114	IAINMDPTTPR	R	K	0.95	1.98	0.479	0	1	0	0	2	1228.64	241	251	TRUE
	PEROXIDASE 35-RELATED [Glycine max]	gi|219914338,gi|255637875,gi|257651553,gi|356563537	NCBI_Gmax.fasta	35524	1	3	3	3	0.00129	0.114	IYSTPVDPTLNK	R	Q	0.95	2.41	0.443	0	1	0	0	2	1347.72	212	223	TRUE
Protein 36	Cytosolic glutamine synthetase GSbeta1 [Glycine max]	gi|10946357,gi|121336,gi|255645187,gi|256143,gi|298532538,gi|298556684,gi|351722651,gi|571486515	NCBI_Gmax.fasta	38991.7	0.998	2	3	3	0.00129	0.199	HETADINTFLWGVANR	R	G	0.95	5.38	0.507	0	1	0	0	2	1843.91	296	311	FALSE	gi|363807092,gi|255645255
	Cytosolic glutamine synthetase GSbeta1 [Glycine max]	gi|10946357,gi|121336,gi|255645187,gi|256143,gi|298532538,gi|298556684,gi|351722651,gi|571486515	NCBI_Gmax.fasta	38991.7	0.998	2	3	3	0.00129	0.199	TLPGPVSDPSELPK	R	W	0.95	2.05	0.371	0	1	0	0	2	1436.76	39	52	TRUE
	Cytosolic glutamine synthetase GSbeta1 [Glycine max]	gi|10946357,gi|121336,gi|255645187,gi|256143,gi|298532538,gi|298556684,gi|351722651,gi|571486515	NCBI_Gmax.fasta	38991.7	0.998	2	3	3	0.00129	0.199	VFSHPDVVAEVPWYGIEQEYTLLQK	K	D	0.95	4.85	0.486	0	1	1	0	2	2947.49	113	137	TRUE
	Cytosolic glutamine synthetase GSbeta1 [Glycine max]	gi|10946357,gi|121336,gi|255645187,gi|256143,gi|298532538,gi|298556684,gi|351722651,gi|571486515	NCBI_Gmax.fasta	38991.7	0.998	2	3	3	0.00129	0.199	VIAEYIWIGGSGMDLR	K	S	0.95	5.05	0.322	0	2	0	0	2	1779.91	19	34	FALSE	gi|363807092,gi|255645255
Protein 37	ADP-ribosylation factor 2-B-like [Glycine max]	gi|356529052,gi|356534669,gi|356534998,gi|356571539,gi|356575319,gi|356575321,gi|356577891,gi|571438610,gi|571483026,gi|571483028,gi|571483031	NCBI_Gmax.fasta	20653.5	0.998	2	2	2	0.000862	0.185	HYFQNTQGLIFVVDSNDRDR	R	V	0.95	3.42	0.41	0	0	1	0	2	2424.17	80	99	TRUE
	ADP-ribosylation factor 2-B-like [Glycine max]	gi|356529052,gi|356534669,gi|356534998,gi|356571539,gi|356575319,gi|356575321,gi|356577891,gi|571438610,gi|571483026,gi|571483028,gi|571483031	NCBI_Gmax.fasta	20653.5	0.998	2	2	2	0.000862	0.185	NISFTVWDVGGQDK	K	I	0.95	3.57	0.579	0	1	0	0	2	1565.76	60	73	TRUE
Protein 38	Nucleoside diphosphate kinase [Glycine max]	gi|1236951,gi|2498078,gi|26245395,gi|26245403,gi|351720837,gi|351721276	NCBI_Gmax.fasta	16342	0.998	2	2	2	0.000862	0.168	GLIGEIISR	S	F	0.95	2.51	0.228	0	1	0	0	2	957.573	17	25	TRUE
	Nucleoside diphosphate kinase [Glycine max]	gi|1236951,gi|2498078,gi|26245395,gi|26245403,gi|351720837,gi|351721276	NCBI_Gmax.fasta	16342	0.998	2	2	2	0.000862	0.168	IIGATNPAQSEPGTIR	K	G	0.95	3.41	0.514	0	1	0	0	2	1624.87	87	102	TRUE
Protein 39	ALCOHOL DEHYDROGENASE RELATED [Glycine max]	gi|218336145,gi|218336163,gi|227308544,gi|227308554,gi|255638965,gi|356509324,gi|356515977	NCBI_Gmax.fasta	41051.3	0.998	2	2	2	0.000862	0.103	FITHTVPFSEINK	K	A	0.95	3	0.325	0	1	0	0	2	1532.81	350	362	TRUE
	ALCOHOL DEHYDROGENASE RELATED [Glycine max]	gi|218336145,gi|218336163,gi|227308544,gi|227308554,gi|255638965,gi|356509324,gi|356515977	NCBI_Gmax.fasta	41051.3	0.998	2	2	2	0.000862	0.103	GQPIYHFVGTSTFSEYTVVHAGCVAK	K	V	0.95	4.91	0.599	0	0	1	0	2	2855.38	139	164	TRUE
Protein 40	Aldo-keto reductase 1-like isoformX1 [Glycine max]	gi|356505965,gi|378548275,gi|571447141,gi|571447143,gi|571447145,gi|571447147	NCBI_Gmax.fasta	46365.3	0.998	2	2	2	0.000862	0.0798	ELGIGIVPYSPLGR	R	G	0.95	2.51	0.481	0	1	0	0	2	1470.83	265	278	TRUE
	Aldo-keto reductase 1-like isoformX1 [Glycine max]	gi|356505965,gi|378548275,gi|571447141,gi|571447143,gi|571447145,gi|571447147	NCBI_Gmax.fasta	46365.3	0.998	2	2	2	0.000862	0.0798	RLDVEYIDLYYQHR	K	I	0.95	3.51	0.238	0	0	1	0	2	1882.94	183	196	TRUE
Protein 41	TRANSLATION FACTOR [Glycine max]	gi|257717336,gi|356558809	NCBI_Gmax.fasta	49406.8	0.998	2	2	2	0.000862	0.161	EHALLAFTLGVK	R	Q	0.95	2.72	0.37	0	1	0	0	2	1298.75	135	146	TRUE
	TRANSLATION FACTOR [Glycine max]	gi|257717336,gi|356558809	NCBI_Gmax.fasta	49406.8	0.998	2	2	2	0.000862	0.161	NMITGTSQADCAVLIIDSTTGGFEAGISK	K	D	0.95	4.25	0.677	0	1	0	0	2	2957.42	101	129	FALSE	gi|351734546,gi|257717332,gi|257717372,gi|571531942,gi|1352345
	TRANSLATION FACTOR [Glycine max]	gi|257717336,gi|356558809	NCBI_Gmax.fasta	49406.8	0.998	2	2	2	0.000862	0.161	VHINIVVIGHVDSGK	K	S	0.95	4.81	0.656	0	1	0	0	2	1586.9	6	20	TRUE
	TRANSLATION FACTOR [Glycine max]	gi|257717336,gi|356558809	NCBI_Gmax.fasta	49406.8	0.998	2	2	2	0.000862	0.161	YYCTVIDAPGHRDFIK	K	N	0.95	2.49	0.306	0	0	1	0	2	1954.95	85	100	FALSE	gi|351734546,gi|257717332,gi|257717372,gi|571531942,gi|1352345
Protein 42	G beta-like protein [Glycine max]	gi|1256608,gi|255645048,gi|3023858,gi|351727433,gi|359806172	NCBI_Gmax.fasta	35748.8	0.998	2	2	2	0.000862	0.0646	SIILWHLTK	K	E	0.95	2.52	0.391	0	1	0	0	2	1110.67	39	47	TRUE
	G beta-like protein [Glycine max]	gi|1256608,gi|255645048,gi|3023858,gi|351727433,gi|359806172	NCBI_Gmax.fasta	35748.8	0.998	2	2	2	0.000862	0.0646	YWLCAATEQSIK	R	I	0.95	2.94	0.401	0	1	0	0	2	1469.71	247	258	TRUE
Protein 43	Cyclophilin [Glycine max]	gi|17981611,gi|257339505,gi|257732408,gi|257732912,gi|257733024,gi|257745084,gi|257745210,gi|257745322,gi|356538541,gi|75304514	NCBI_Gmax.fasta	18224.6	0.998	2	2	2	0.000862	0.192	HVVFGQVIEGLNVVKDIEK	K	V	0.95	4.18	0.527	0	0	1	0	2	2123.19	133	151	TRUE
	Cyclophilin [Glycine max]	gi|17981611,gi|257339505,gi|257732408,gi|257732912,gi|257733024,gi|257745084,gi|257745210,gi|257745322,gi|356538541,gi|75304514	NCBI_Gmax.fasta	18224.6	0.998	2	2	2	0.000862	0.192	VFFDMTIGGQSAGR	K	I	0.95	4.34	0.545	0	1	0	0	2	1485.72	6	19	TRUE
Protein 44	60S RIBOSOMAL PROTEIN L7 [Glycine max]	gi|571463853,gi|571463855,gi|571472621	NCBI_Gmax.fasta	28772.4	0.998	2	2	2	0.000862	0.114	TALTDNSIIEQALGK	R	Y	0.95	3.89	0.472	0	1	0	0	2	1573.84	165	179	TRUE
	60S RIBOSOMAL PROTEIN L7 [Glycine max]	gi|571463853,gi|571463855,gi|571472621	NCBI_Gmax.fasta	28772.4	0.998	2	2	2	0.000862	0.114	VEPYVTYGYPNLK	R	S	0.95	2.81	0.32	0	1	0	0	2	1542.78	134	146	TRUE
Protein 45	Heat shock protein 90-2 [Glycine max]	gi|208964722,gi|208964724,gi|288310312,gi|288311314,gi|351725976,gi|351726363,gi|356552478,gi|358248990	NCBI_Gmax.fasta	80469.1	0.998	2	2	2	0.000862	0.0371	ADLVNNLGTIAR	K	S	0.95	1.87	0.394	0	1	0	0	2	1256.7	88	99	TRUE
	Heat shock protein 90-2 [Glycine max]	gi|208964722,gi|208964724,gi|288310312,gi|288311314,gi|351725976,gi|351726363,gi|356552478,gi|358248990	NCBI_Gmax.fasta	80469.1	0.998	2	2	2	0.000862	0.0371	GIVDSEDLPLNISR	K	E	0.95	2.53	0.3	0	1	0	0	2	1527.8	358	371	TRUE
Protein 46	MITOCHONDRIAL DICARBOXYLATE/TRICARBOXYLATE TRANSPORTER DTC [Glycine max]	gi|255645797,gi|356512511,gi|356525280	NCBI_Gmax.fasta	29168.8	0.998	2	2	2	0.000862	0.0842	ITADEGVLALWK	R	G	0.95	3.16	0.451	0	1	0	0	2	1315.73	132	143	TRUE
	MITOCHONDRIAL DICARBOXYLATE/TRICARBOXYLATE TRANSPORTER DTC [Glycine max]	gi|255645797,gi|356512511,gi|356525280	NCBI_Gmax.fasta	29168.8	0.998	2	2	2	0.000862	0.0842	NYTNAFHALYR	R	I	0.95	3.42	0.387	0	1	0	0	2	1369.66	121	131	TRUE
Protein 47	Glutamate dehydrogenase (NAD(P)(+)) / Glutamic dehydrogenase [Glycine max]	gi|257315215,gi|351727761,gi|571524147,gi|571524150,gi|571524153,gi|59668638	NCBI_Gmax.fasta	44549.4	1	2	2	2	0.000862	0.0657	GVLFATEALLNEYGK	R	S	0.95	4.35	0.469	0	1	0	0	2	1624.86	188	202	TRUE
	Glutamate dehydrogenase (NAD(P)(+)) / Glutamic dehydrogenase [Glycine max]	gi|257315215,gi|351727761,gi|571524147,gi|571524150,gi|571524153,gi|59668638	NCBI_Gmax.fasta	44549.4	1	2	2	2	0.000862	0.0657	VVAVSDITGAIK	K	N	0.95	2.65	0.42	0	1	0	0	2	1172.69	232	243	TRUE
Protein 48	Glutamyl-tRNA reductase 2, chloroplastic-like [Glycine max]	gi|356527983	NCBI_Gmax.fasta	59018.2	0.998	2	2	2	0.000862	0.0592	FSVNATCPFFSDNNGNK	R	I	0.95	3.14	0.417	0	1	0	0	2	1636.88	298	312	TRUE
	Glutamyl-tRNA reductase 2, chloroplastic-like [Glycine max]	gi|356527983	NCBI_Gmax.fasta	59018.2	0.998	2	2	2	0.000862	0.0592	LPDSSFADSGVLVVGAGK	K	M	0.95	2.31	0.475	0	1	0	0	2	1199.64	264	274	TRUE
Protein 49	ACTIN-7 [Glycine max]	gi|571453215,gi|571477240,gi|571477242,gi|571488614,gi|571492339,gi|571502842,gi|571502846,gi|571502850,gi|571515593,gi|571515597,gi|571515601	NCBI_Gmax.fasta	41595.5	0.998	2	2	2	0.000862	0.127	TTGIVLDSGDGVSHTVPIYEGYALPHAILR	R	L	0.95	5.09	0.602	0	0	1	0	2	3151.64	150	179	TRUE
	ACTIN-7 [Glycine max]	gi|571453215,gi|571477240,gi|571477242,gi|571488614,gi|571492339,gi|571502842,gi|571502846,gi|571502850,gi|571515593,gi|571515597,gi|571515601	NCBI_Gmax.fasta	41595.5	0.998	2	2	2	0.000862	0.127	VAPEEHPVLLTEAPLNPK	R	A	0.95	3.24	0.558	0	1	0	0	2	1954.06	98	115	TRUE
Protein 50	PEROXIDASE 36-RELATED [Glycine max]	gi|257666808,gi|257716223,gi|356502964	NCBI_Gmax.fasta	36838.2	0.998	2	2	2	0.000862	0.103	DSVVLTGGPNWEVPLGR	R	R	0.95	3.79	0.574	0	1	0	0	2	1795.93	135	151	TRUE
	PEROXIDASE 36-RELATED [Glycine max]	gi|257666808,gi|257716223,gi|356502964	NCBI_Gmax.fasta	36838.2	0.998	2	2	2	0.000862	0.103	QCPSTVSCADILTLAAR	R	D	0.95	3.21	0.552	0	1	0	0	2	1862.91	118	134	TRUE
	PEROXIDASE 36-RELATED [Glycine max]	gi|257710887,gi|316937088,gi|351720808,gi|571541782	NCBI_Gmax.fasta	29065	0.998	1	1	2	0.000862	0.0661	LAEQAERYEEMVEFMEK	K	V	0.95	4.15	0.644	0	1	0	0	2	2131.97	15	31	TRUE
Protein 51	Actin, partial [Glycine max]	gi|1498342,gi|356525914,gi|356558578	NCBI_Gmax.fasta	41623.4	0.998	2	2	2	0.000862	0.147	GYSFSTSAEKEIVR	R	D	0.95	3.28	0.415	0	1	0	0	2	1573.79	199	212	TRUE
	Actin, partial [Glycine max]	gi|1498342,gi|356525914,gi|356558578	NCBI_Gmax.fasta	41623.4	0.998	2	2	2	0.000862	0.147	LAYVALDFEQEMETTK	K	S	0.95	4.96	0.644	0	1	0	0	2	1887.9	218	233	TRUE
Protein 52	Heat shock cognate 70 kDa protein 2-like [Glycine max]	gi|356569000,gi|571439426,gi|571492353,gi|571534447,gi|571558180	NCBI_Gmax.fasta	64466.9	0.998	2	2	2	0.000862	0.0495	IINEPTAAAIAYGLDKK	R	A	0.95	4.08	0.554	0	1	0	0	2	1787.99	113	129	TRUE
	Heat shock cognate 70 kDa protein 2-like [Glycine max]	gi|356569000,gi|571439426,gi|571492353,gi|571534447,gi|571558180	NCBI_Gmax.fasta	64466.9	0.998	2	2	2	0.000862	0.0495	NAVVTVPAYFNDSQR	K	Q	0.95	2.79	0.515	0	1	0	0	2	1680.83	82	96	TRUE
Protein 53	Aldehyde dehydrogenase family 2 member B7, mitochondrial-like [Glycine max]	gi|356567618	NCBI_Gmax.fasta	58324.3	0.997	2	2	2	0.000862	0.0634	VGPALACGNTIVLK	K	T	0.947	2.84	0.17	0	1	0	0	2	1412.79	214	227	TRUE
	Aldehyde dehydrogenase family 2 member B7, mitochondrial-like [Glycine max]	gi|356567618	NCBI_Gmax.fasta	58324.3	0.997	2	2	2	0.000862	0.0634	YGLAAGVFTTNMDTAYTLTR	R	A	0.95	5.21	0.675	0	1	0	0	2	2166.05	460	479	TRUE
Protein 54	3-hydroxyacyl-[acyl-carrier-protein] dehydratase / D-3-hydroxyoctanoyl-[acyl carrier protein] dehydratase [Glycine max]	gi|227286705,gi|255640918,gi|255646290,gi|356558645,gi|358248728	NCBI_Gmax.fasta	19825.7	0.998	2	2	2	0.000862	0.126	VIEYNPGVSAVAIK	R	N	0.95	3.61	0.571	0	1	0	0	2	1459.82	101	114	TRUE
	3-hydroxyacyl-[acyl-carrier-protein] dehydratase / D-3-hydroxyoctanoyl-[acyl carrier protein] dehydratase [Glycine max]	gi|227286705,gi|255640918,gi|255646290,gi|356558645,gi|358248728	NCBI_Gmax.fasta	19825.7	0.998	2	2	2	0.000862	0.126	YPAFPTVMDINQIR	R	D	0.95	2.93	0.238	0	1	0	0	2	1664.85	73	86	TRUE
Protein 55	BIFUNCTIONAL INHIBITOR/LIPID-TRANSFER PROTEIN/SEED STORAGE 2S ALBUMIN SUPERFAMILY PROTEIN [Glycine max]	gi|255633146,gi|255647364,gi|351725313,gi|359806142	NCBI_Gmax.fasta	13167.8	0.999	2	2	2	0.000862	0.236	GLADLEVAACLCTALK	K	A	0.95	4.02	0.511	0	1	0	0	2	1704.87	81	96	TRUE
	BIFUNCTIONAL INHIBITOR/LIPID-TRANSFER PROTEIN/SEED STORAGE 2S ALBUMIN SUPERFAMILY PROTEIN [Glycine max]	gi|255633146,gi|255647364,gi|351725313,gi|359806142	NCBI_Gmax.fasta	13167.8	0.999	2	2	2	0.000862	0.236	LGVCANVLNLVNVK	K	L	0.95	3.43	0.479	0	1	0	0	2	1512.86	53	66	TRUE
Protein 56	Elongation factor 2-like [Glycine max]	gi|356525774,gi|356556977	NCBI_Gmax.fasta	94058.2	1	2	2	2	0.000862	0.0403	AYLPVIESFGFSSTLR	K	A	0.95	4.92	0.551	0	1	0	0	2	1786.94	771	786	TRUE
	Elongation factor 2-like [Glycine max]	gi|356525774,gi|356556977	NCBI_Gmax.fasta	94058.2	1	2	2	2	0.000862	0.0403	CFLELQVDGEEAYQTFQR	R	V	0.95	5.63	0.618	0	1	0	0	2	2233.02	163	180	TRUE
Protein 57	Malate dehydrogenase / Malic dehydrogenase [Glycine max]	gi|1276977,gi|255640909,gi|571488357	NCBI_Gmax.fasta	18048.1	0.999	2	2	2	0.000862	0.168	GFSEEQEALVVK	R	S	0.95	3.13	0.473	0	1	0	0	2	1335.68	8	19	TRUE
	Malate dehydrogenase / Malic dehydrogenase [Glycine max]	gi|1276977,gi|255640909,gi|571488357	NCBI_Gmax.fasta	18048.1	0.999	2	2	2	0.000862	0.168	NAWGEAYDQLVDAIK	K	S	0.95	3.71	0.499	0	1	0	0	2	1692.82	139	153	TRUE
	Malate dehydrogenase / Malic dehydrogenase [Glycine max]	gi|330728068,gi|330730355,gi|332617479,gi|332628129,gi|544328955,gi|550553975,gi|571493434,gi|5929964	NCBI_Gmax.fasta	36141.9	0.998	2	2	2	0.000862	0.0899	DDLFNINAGIVK	R	T	0.95	2.83	0.38	0	1	0	0	2	1318.7	120	131	TRUE
	Malate dehydrogenase / Malic dehydrogenase [Glycine max]	gi|330728068,gi|330730355,gi|332617479,gi|332628129,gi|544328955,gi|550553975,gi|571493434,gi|5929964	NCBI_Gmax.fasta	36141.9	0.998	2	2	2	0.000862	0.0899	VAVLGAAGGIGQPLSLLMK	K	L	0.95	5.41	0.688	0	1	0	0	2	1795.05	36	54	TRUE
Protein 58	26S proteasome non-ATPase regulatory subunit 3-like [Glycine max]	gi|356509165,gi|356517716,gi|356553349	NCBI_Gmax.fasta	55651.2	0.998	1	1	1	0.000431	0.0267	ALRPYFELTNAVR	K	I	0.95	2.83	0.384	0	1	0	0	2	1549.85	308	320	TRUE
Protein 59	ASPARTATE AMINOTRANSFERASE 3, CHLOROPLASTIC [Glycine max]	gi|227468309,gi|255641956,gi|259665564,gi|259665908,gi|2654094,gi|2654095,gi|298547077,gi|298553295,gi|300557551,gi|300592973,gi|351723615	NCBI_Gmax.fasta	45601.2	0.991	1	1	1	0.000431	0.0406	LFVADGGELLVAQSYAK	R	N	0.95	4.07	0.664	0	1	0	0	2	1780.95	249	265	TRUE
Protein 60	Fructose-bisphosphate aldolase / Fructose-1,6-bisphosphate triosephosphate-lyase [Glycine max]	gi|255647273,gi|363807310	NCBI_Gmax.fasta	38339.7	0.992	1	1	1	0.000431	0.0475	YHDELIVNAAYIGTPGK	K	G	0.95	4.46	0.592	0	1	0	0	2	1860.95	8	24	TRUE
END OF FILE

## Sheet: Essex LC-MS SCN infected
MS/MS sample name	Protein name	Protein accession numbers	Database sources	Protein molecular weight (Da)	Protein identification probability	Number of unique peptides	Number of unique spectra	Number of total spectra	Percentage of total spectra	Percentage sequence coverage	Peptide sequence	Previous amino acid	Next amino acid	Best Peptide identification probability	Best SEQUEST XCorr score	Best SEQUEST DCn score	Number of identified +1H spectra	Number of identified +2H spectra	Number of identified +3H spectra	Number of identified +4H spectra	Number of enzymatic termini	Calculated +1H Peptide Mass (AMU)	Peptide start index	Peptide stop index	Assigned	Other Proteins
Protein 1	Serine hydroxymethyltransferase [Glycine max]	gi|296512839,gi|356552984	NCBI_Gmax.fasta	56158.5	1	24	33	36	0.027	0.639	ALEAFQLDPAK	R	W	0.95	2	0.388	0	1	0	0	2	1202.64	119	129	TRUE
	Serine hydroxymethyltransferase [Glycine max]	gi|296512839,gi|356552984	NCBI_Gmax.fasta	56158.5	1	24	33	36	0.027	0.639	ALEAFQLDPAKWGVNVQSLSGSPSNFQVYTALLKPHER	R	I	0.95	3.69	0.399	0	0	0	1	2	4198.17	119	156	TRUE
	Serine hydroxymethyltransferase [Glycine max]	gi|296512839,gi|356552984	NCBI_Gmax.fasta	56158.5	1	24	33	36	0.027	0.639	AVLLADMAHISGLVAAGVIPSPFDYADVVTTTTHK	K	S	0.95	7.2	0.617	0	0	1	1	2	3580.87	242	276	TRUE	gi|356500779
	Serine hydroxymethyltransferase [Glycine max]	gi|296512839,gi|356552984	NCBI_Gmax.fasta	56158.5	1	24	33	36	0.027	0.639	EVLYDYEDKINQAVFPGLQGGPHNHTISGLAVALK	K	Q	0.95	5.87	0.6	0	0	1	1	2	3793.96	301	335	TRUE
	Serine hydroxymethyltransferase [Glycine max]	gi|296512839,gi|356552984	NCBI_Gmax.fasta	56158.5	1	24	33	36	0.027	0.639	GFVEEDFEKVAEYFDAAVK	R	L	0.95	5.4	0.677	0	1	1	0	2	2193.04	430	448	TRUE	gi|356500779
	Serine hydroxymethyltransferase [Glycine max]	gi|296512839,gi|356552984	NCBI_Gmax.fasta	56158.5	1	24	33	36	0.027	0.639	GYELVSGGTDNHLVLVNLR	K	N	0.95	6.17	0.637	0	1	1	0	2	2056.08	364	382	TRUE	gi|356500779
	Serine hydroxymethyltransferase [Glycine max]	gi|296512839,gi|356552984	NCBI_Gmax.fasta	56158.5	1	24	33	36	0.027	0.639	IANLCHEVEDYAK	K	K	0.95	3.79	0.592	0	1	0	0	2	1561.73	479	491	TRUE
	Serine hydroxymethyltransferase [Glycine max]	gi|296512839,gi|356552984	NCBI_Gmax.fasta	56158.5	1	24	33	36	0.027	0.639	IMALDLPHGGHLSHGYQTDTK	R	K	0.95	3.17	0.523	0	0	1	0	2	2291.12	157	177	TRUE	gi|296512841,gi|571541380,gi|296512833,gi|356500779,gi|351722703,gi|571468907
	Serine hydroxymethyltransferase [Glycine max]	gi|296512839,gi|356552984	NCBI_Gmax.fasta	56158.5	1	24	33	36	0.027	0.639	IMALDLPHGGHLSHGYQTDTKK	R	I	0.95	3.36	0.395	0	0	1	0	2	2419.22	157	178	TRUE	gi|296512841,gi|571541380,gi|296512833,gi|356500779,gi|351722703,gi|571468907
	Serine hydroxymethyltransferase [Glycine max]	gi|296512839,gi|356552984	NCBI_Gmax.fasta	56158.5	1	24	33	36	0.027	0.639	ISAVSIFFETMPYR	K	L	0.95	4.19	0.624	0	2	0	0	2	1660.84	179	192	TRUE	gi|296512841,gi|571541380,gi|296512833,gi|356500779,gi|351722703,gi|571468907
	Serine hydroxymethyltransferase [Glycine max]	gi|296512839,gi|356552984	NCBI_Gmax.fasta	56158.5	1	24	33	36	0.027	0.639	KFPTIGFNIETMK	K	Y	0.95	2.71	0.43	0	1	0	0	2	1525.81	492	504	TRUE
	Serine hydroxymethyltransferase [Glycine max]	gi|296512839,gi|356552984	NCBI_Gmax.fasta	56158.5	1	24	33	36	0.027	0.639	KISAVSIFFETMPYR	K	L	0.95	5.07	0.561	0	2	0	0	2	1788.94	178	192	TRUE	gi|296512841,gi|571541380,gi|296512833,gi|356500779,gi|351722703,gi|571468907
	Serine hydroxymethyltransferase [Glycine max]	gi|296512839,gi|356552984	NCBI_Gmax.fasta	56158.5	1	24	33	36	0.027	0.639	LKDFVAAMQSDEQIQSK	K	I	0.95	5.55	0.447	0	1	1	0	2	1937.96	462	478	TRUE
	Serine hydroxymethyltransferase [Glycine max]	gi|296512839,gi|356552984	NCBI_Gmax.fasta	56158.5	1	24	33	36	0.027	0.639	LNESTGYIDYDQLEK	R	S	0.95	5.02	0.607	0	1	0	0	2	1787.83	193	207	TRUE	gi|356500779
	Serine hydroxymethyltransferase [Glycine max]	gi|296512839,gi|356552984	NCBI_Gmax.fasta	56158.5	1	24	33	36	0.027	0.639	NTVPGDVSAMVPGGIR	K	M	0.95	2.75	0.478	0	1	0	0	2	1585.8	405	420	TRUE	gi|296512841,gi|571541380,gi|296512833,gi|356500779,gi|351722703,gi|571468907
	Serine hydroxymethyltransferase [Glycine max]	gi|296512839,gi|356552984	NCBI_Gmax.fasta	56158.5	1	24	33	36	0.027	0.639	QLNDPLEAIDPEIADIIELEK	K	A	0.95	2.96	0.492	0	1	0	0	2	2378.23	40	60	TRUE
	Serine hydroxymethyltransferase [Glycine max]	gi|296512839,gi|356552984	NCBI_Gmax.fasta	56158.5	1	24	33	36	0.027	0.639	QLNDPLEAIDPEIADIIELEKAR	K	Q	0.95	3.53	0.547	0	0	1	0	2	2605.37	40	62	TRUE
	Serine hydroxymethyltransferase [Glycine max]	gi|296512839,gi|356552984	NCBI_Gmax.fasta	56158.5	1	24	33	36	0.027	0.639	QVLSNCSAFAQSLLEK	K	G	0.95	4.8	0.596	0	1	0	0	2	1794.91	348	363	TRUE	gi|356500779
	Serine hydroxymethyltransferase [Glycine max]	gi|296512839,gi|356552984	NCBI_Gmax.fasta	56158.5	1	24	33	36	0.027	0.639	QVLSNCSAFAQSLLEKGYELVSGGTDNHLVLVNLR	K	N	0.95	5.29	0.607	0	0	1	1	2	3831.97	348	382	TRUE	gi|356500779
	Serine hydroxymethyltransferase [Glycine max]	gi|296512839,gi|356552984	NCBI_Gmax.fasta	56158.5	1	24	33	36	0.027	0.639	VLEAVHIAANK	K	N	0.95	3	0.496	0	1	0	0	2	1164.67	394	404	TRUE	gi|296512841,gi|571541380,gi|296512833,gi|356500779,gi|351722703,gi|571468907
	Serine hydroxymethyltransferase [Glycine max]	gi|296512839,gi|356552984	NCBI_Gmax.fasta	56158.5	1	24	33	36	0.027	0.639	VLEAVHIAANKNTVPGDVSAMVPGGIR	K	M	0.95	5.09	0.635	0	0	2	1	2	2731.46	394	420	TRUE	gi|296512841,gi|571541380,gi|296512833,gi|356500779,gi|351722703,gi|571468907
	Serine hydroxymethyltransferase [Glycine max]	gi|296512839,gi|356552984	NCBI_Gmax.fasta	56158.5	1	24	33	36	0.027	0.639	WGVNVQSLSGSPSNFQVYTALLKPHER	K	I	0.95	4.43	0.57	0	0	1	0	2	3014.55	130	156	TRUE	gi|356500779
	Serine hydroxymethyltransferase [Glycine max]	gi|296512839,gi|356552984	NCBI_Gmax.fasta	56158.5	1	24	33	36	0.027	0.639	YYGGNEYIDMAETLCQK	R	R	0.95	5.49	0.63	0	1	0	0	2	2054.88	101	117	TRUE	gi|296512841,gi|571541380,gi|296512833,gi|356500779,gi|351722703,gi|571468907
	Serine hydroxymethyltransferase [Glycine max]	gi|296512839,gi|356552984	NCBI_Gmax.fasta	56158.5	1	24	33	36	0.027	0.639	YYGGNEYIDMAETLCQKR	R	A	0.95	3.92	0.66	0	1	1	0	2	2210.98	101	118	TRUE	gi|296512841,gi|571541380,gi|296512833,gi|356500779,gi|351722703,gi|571468907
	Serine hydroxymethyltransferase [Glycine max]	gi|356500779	NCBI_Gmax.fasta	56943.4	1	5	6	6	0.0045	0.609	AVLLADMAHISGLVAAGVIPSPFDYADVVTTTTHK	K	S	0.95	7.2	0.617	0	0	1	1	2	3580.87	249	283	FALSE	gi|356552984,gi|296512839
	Serine hydroxymethyltransferase [Glycine max]	gi|356500779	NCBI_Gmax.fasta	56943.4	1	5	6	6	0.0045	0.609	EVLYDYEDRINQAVFPGLQGGPHNHTISGLAVALK	K	Q	0.95	4.78	0.552	0	0	0	1	2	3821.96	308	342	TRUE
	Serine hydroxymethyltransferase [Glycine max]	gi|356500779	NCBI_Gmax.fasta	56943.4	1	5	6	6	0.0045	0.609	GFVEEDFEKVAEYFDAAVK	R	L	0.95	5.4	0.677	0	1	1	0	2	2193.04	437	455	FALSE	gi|356552984,gi|296512839
	Serine hydroxymethyltransferase [Glycine max]	gi|356500779	NCBI_Gmax.fasta	56943.4	1	5	6	6	0.0045	0.609	GYELVSGGTDNHLVLVNLR	K	N	0.95	6.17	0.637	0	1	1	0	2	2056.08	371	389	FALSE	gi|356552984,gi|296512839
	Serine hydroxymethyltransferase [Glycine max]	gi|356500779	NCBI_Gmax.fasta	56943.4	1	5	6	6	0.0045	0.609	IANLRHEVEDYAK	K	Q	0.95	2.94	0.406	0	1	0	0	2	1557.8	486	498	TRUE
	Serine hydroxymethyltransferase [Glycine max]	gi|356500779	NCBI_Gmax.fasta	56943.4	1	5	6	6	0.0045	0.609	IMALDLPHGGHLSHGYQTDTK	R	K	0.95	3.17	0.523	0	0	1	0	2	2291.12	164	184	FALSE	gi|296512841,gi|571541380,gi|296512833,gi|351722703,gi|571468907,gi|356552984,gi|296512839
	Serine hydroxymethyltransferase [Glycine max]	gi|356500779	NCBI_Gmax.fasta	56943.4	1	5	6	6	0.0045	0.609	IMALDLPHGGHLSHGYQTDTKK	R	I	0.95	3.36	0.395	0	0	1	0	2	2419.22	164	185	FALSE	gi|296512841,gi|571541380,gi|296512833,gi|351722703,gi|571468907,gi|356552984,gi|296512839
	Serine hydroxymethyltransferase [Glycine max]	gi|356500779	NCBI_Gmax.fasta	56943.4	1	5	6	6	0.0045	0.609	ISAVSIFFETMPYR	K	L	0.95	4.19	0.624	0	2	0	0	2	1660.84	186	199	FALSE	gi|296512841,gi|571541380,gi|296512833,gi|351722703,gi|571468907,gi|356552984,gi|296512839
	Serine hydroxymethyltransferase [Glycine max]	gi|356500779	NCBI_Gmax.fasta	56943.4	1	5	6	6	0.0045	0.609	KISAVSIFFETMPYR	K	L	0.95	5.07	0.561	0	2	0	0	2	1788.94	185	199	FALSE	gi|296512841,gi|571541380,gi|296512833,gi|351722703,gi|571468907,gi|356552984,gi|296512839
	Serine hydroxymethyltransferase [Glycine max]	gi|356500779	NCBI_Gmax.fasta	56943.4	1	5	6	6	0.0045	0.609	LKDFVAAMQSDEQVQSK	K	I	0.95	6.06	0.599	0	1	1	0	2	1923.95	469	485	TRUE
	Serine hydroxymethyltransferase [Glycine max]	gi|356500779	NCBI_Gmax.fasta	56943.4	1	5	6	6	0.0045	0.609	LNESTGYIDYDQLEK	R	S	0.95	5.02	0.607	0	1	0	0	2	1787.83	200	214	FALSE	gi|356552984,gi|296512839
	Serine hydroxymethyltransferase [Glycine max]	gi|356500779	NCBI_Gmax.fasta	56943.4	1	5	6	6	0.0045	0.609	NTVPGDVSAMVPGGIR	K	M	0.95	2.75	0.478	0	1	0	0	2	1585.8	412	427	FALSE	gi|296512841,gi|571541380,gi|296512833,gi|351722703,gi|571468907,gi|356552984,gi|296512839
	Serine hydroxymethyltransferase [Glycine max]	gi|356500779	NCBI_Gmax.fasta	56943.4	1	5	6	6	0.0045	0.609	QFPTIGFDIETMK	K	Y	0.95	1.81	0.308	0	1	0	0	2	1526.76	499	511	TRUE
	Serine hydroxymethyltransferase [Glycine max]	gi|356500779	NCBI_Gmax.fasta	56943.4	1	5	6	6	0.0045	0.609	QLNDPLETIDPEIADIIELEKAR	K	Q	0.95	3.28	0.467	0	0	1	0	2	2635.38	47	69	TRUE
	Serine hydroxymethyltransferase [Glycine max]	gi|356500779	NCBI_Gmax.fasta	56943.4	1	5	6	6	0.0045	0.609	QVLSNCSAFAQSLLEK	K	G	0.95	4.8	0.596	0	1	0	0	2	1794.91	355	370	FALSE	gi|356552984,gi|296512839
	Serine hydroxymethyltransferase [Glycine max]	gi|356500779	NCBI_Gmax.fasta	56943.4	1	5	6	6	0.0045	0.609	QVLSNCSAFAQSLLEKGYELVSGGTDNHLVLVNLR	K	N	0.95	5.29	0.607	0	0	1	1	2	3831.97	355	389	FALSE	gi|356552984,gi|296512839
	Serine hydroxymethyltransferase [Glycine max]	gi|356500779	NCBI_Gmax.fasta	56943.4	1	5	6	6	0.0045	0.609	VLEAVHIAANK	K	N	0.95	3	0.496	0	1	0	0	2	1164.67	401	411	FALSE	gi|296512841,gi|571541380,gi|296512833,gi|351722703,gi|571468907,gi|356552984,gi|296512839
	Serine hydroxymethyltransferase [Glycine max]	gi|356500779	NCBI_Gmax.fasta	56943.4	1	5	6	6	0.0045	0.609	VLEAVHIAANKNTVPGDVSAMVPGGIR	K	M	0.95	5.09	0.635	0	0	2	1	2	2731.46	401	427	FALSE	gi|296512841,gi|571541380,gi|296512833,gi|351722703,gi|571468907,gi|356552984,gi|296512839
	Serine hydroxymethyltransferase [Glycine max]	gi|356500779	NCBI_Gmax.fasta	56943.4	1	5	6	6	0.0045	0.609	WGVNVQSLSGSPSNFQVYTALLKPHER	K	I	0.95	4.43	0.57	0	0	1	0	2	3014.55	137	163	FALSE	gi|356552984,gi|296512839
	Serine hydroxymethyltransferase [Glycine max]	gi|356500779	NCBI_Gmax.fasta	56943.4	1	5	6	6	0.0045	0.609	YYGGNEYIDMAETLCQK	R	R	0.95	5.49	0.63	0	1	0	0	2	2054.88	108	124	FALSE	gi|296512841,gi|571541380,gi|296512833,gi|351722703,gi|571468907,gi|356552984,gi|296512839
	Serine hydroxymethyltransferase [Glycine max]	gi|356500779	NCBI_Gmax.fasta	56943.4	1	5	6	6	0.0045	0.609	YYGGNEYIDMAETLCQKR	R	A	0.95	3.92	0.66	0	1	1	0	2	2210.98	108	125	FALSE	gi|296512841,gi|571541380,gi|296512833,gi|351722703,gi|571468907,gi|356552984,gi|296512839
Protein 2	Glycine dehydrogenase [decarboxylating], mitochondrial-like [Glycine max]	gi|356564051	NCBI_Gmax.fasta	114623	1	26	30	31	0.0232	0.344	DLSLCHSMIPLGSCTMK	K	L	0.95	4.15	0.54	0	2	0	0	2	1949.9	582	598	TRUE	gi|356514615,gi|227305854,gi|356509819,gi|356552354
	Glycine dehydrogenase [decarboxylating], mitochondrial-like [Glycine max]	gi|356564051	NCBI_Gmax.fasta	114623	1	26	30	31	0.0232	0.344	FDAGLTESQMIEHMK	K	D	0.95	3.05	0.483	0	1	0	0	2	1736.8	142	156	TRUE
	Glycine dehydrogenase [decarboxylating], mitochondrial-like [Glycine max]	gi|356564051	NCBI_Gmax.fasta	114623	1	26	30	31	0.0232	0.344	FGVPMGYGGPHAAFLATSQEYKR	R	M	0.95	5.22	0.608	0	1	0	0	2	2484.21	357	379	TRUE	gi|356514615,gi|227305854,gi|356509819,gi|356552354
	Glycine dehydrogenase [decarboxylating], mitochondrial-like [Glycine max]	gi|356564051	NCBI_Gmax.fasta	114623	1	26	30	31	0.0232	0.344	GVNGTVAHEFIIDLR	R	G	0.95	4.15	0.519	0	1	0	0	2	1640.88	894	908	TRUE	gi|227305854,gi|356509819,gi|356552354
	Glycine dehydrogenase [decarboxylating], mitochondrial-like [Glycine max]	gi|356564051	NCBI_Gmax.fasta	114623	1	26	30	31	0.0232	0.344	IVSVGTDAKGNINIEELR	K	K	0.95	4.65	0.57	0	1	0	0	2	1928.04	702	719	TRUE	gi|356514615,gi|227305854,gi|356552354
	Glycine dehydrogenase [decarboxylating], mitochondrial-like [Glycine max]	gi|356564051	NCBI_Gmax.fasta	114623	1	26	30	31	0.0232	0.344	IVSVGTDAKGNINIEELRK	K	A	0.95	2.74	0.506	0	0	1	0	2	2056.14	702	720	TRUE	gi|356514615,gi|227305854,gi|356552354
	Glycine dehydrogenase [decarboxylating], mitochondrial-like [Glycine max]	gi|356564051	NCBI_Gmax.fasta	114623	1	26	30	31	0.0232	0.344	KLGTVEVQDLPFFDTVK	K	V	0.95	4.1	0.513	0	1	0	0	2	1936.04	461	477	TRUE
	Glycine dehydrogenase [decarboxylating], mitochondrial-like [Glycine max]	gi|356564051	NCBI_Gmax.fasta	114623	1	26	30	31	0.0232	0.344	KSPYLTHSIFNMYQTEHELLR	R	Y	0.95	5.06	0.579	0	0	1	0	2	2607.3	553	573	TRUE
	Glycine dehydrogenase [decarboxylating], mitochondrial-like [Glycine max]	gi|356564051	NCBI_Gmax.fasta	114623	1	26	30	31	0.0232	0.344	LENYYPVLFR	R	G	0.95	1.83	0.344	0	1	0	0	2	1313.69	884	893	TRUE	gi|227305854,gi|356552354
	Glycine dehydrogenase [decarboxylating], mitochondrial-like [Glycine max]	gi|356564051	NCBI_Gmax.fasta	114623	1	26	30	31	0.0232	0.344	LGTVEVQDLPFFDTVK	K	V	0.95	4.26	0.563	0	1	0	0	2	1807.95	462	477	TRUE
	Glycine dehydrogenase [decarboxylating], mitochondrial-like [Glycine max]	gi|356564051	NCBI_Gmax.fasta	114623	1	26	30	31	0.0232	0.344	LKEMTFGKFDAGLTESQMIEHMK	R	D	0.95	5.25	0.51	0	0	1	0	2	2671.29	134	156	TRUE
	Glycine dehydrogenase [decarboxylating], mitochondrial-like [Glycine max]	gi|356564051	NCBI_Gmax.fasta	114623	1	26	30	31	0.0232	0.344	MAESIGFESLDSLVDATVPK	K	S	0.95	5.53	0.601	0	1	0	0	2	2109.04	111	130	TRUE
	Glycine dehydrogenase [decarboxylating], mitochondrial-like [Glycine max]	gi|356564051	NCBI_Gmax.fasta	114623	1	26	30	31	0.0232	0.344	NIMENPAWYTQYTPYQAEISQGR	R	L	0.95	4.34	0.679	0	1	0	0	2	2760.27	185	207	TRUE	gi|356514615,gi|227305854,gi|356509819,gi|356552354
	Glycine dehydrogenase [decarboxylating], mitochondrial-like [Glycine max]	gi|356564051	NCBI_Gmax.fasta	114623	1	26	30	31	0.0232	0.344	NVCIIPVSAHGTNPASAAMCGMK	R	I	0.95	5.14	0.7	0	1	1	0	2	2386.11	679	701	TRUE	gi|227305854,gi|356552354
	Glycine dehydrogenase [decarboxylating], mitochondrial-like [Glycine max]	gi|356564051	NCBI_Gmax.fasta	114623	1	26	30	31	0.0232	0.344	QEIAEIEKGNADINNNVLK	R	S	0.95	4.21	0.41	0	1	1	0	2	2112.09	968	986	TRUE
	Glycine dehydrogenase [decarboxylating], mitochondrial-like [Glycine max]	gi|356564051	NCBI_Gmax.fasta	114623	1	26	30	31	0.0232	0.344	RLENYYPVLFR	K	G	0.95	4.23	0.602	0	1	0	0	2	1469.79	883	893	TRUE	gi|227305854,gi|356552354
	Glycine dehydrogenase [decarboxylating], mitochondrial-like [Glycine max]	gi|356564051	NCBI_Gmax.fasta	114623	1	26	30	31	0.0232	0.344	SGDVCGVLVQYPGTEGEVLDYGEFVK	K	K	0.95	3.9	0.668	0	1	0	0	2	2817.33	293	318	TRUE	gi|356514615,gi|227305854,gi|356552354
	Glycine dehydrogenase [decarboxylating], mitochondrial-like [Glycine max]	gi|356564051	NCBI_Gmax.fasta	114623	1	26	30	31	0.0232	0.344	SGDVCGVLVQYPGTEGEVLDYGEFVKK	K	A	0.95	2.94	0.401	0	0	1	0	2	2945.42	293	319	TRUE	gi|227305854,gi|356552354
	Glycine dehydrogenase [decarboxylating], mitochondrial-like [Glycine max]	gi|356564051	NCBI_Gmax.fasta	114623	1	26	30	31	0.0232	0.344	SPYLTHSIFNMYQTEHELLR	K	Y	0.95	5.01	0.535	0	0	1	0	2	2479.21	554	573	TRUE
	Glycine dehydrogenase [decarboxylating], mitochondrial-like [Glycine max]	gi|356564051	NCBI_Gmax.fasta	114623	1	26	30	31	0.0232	0.344	SYIGMGYYNTHVPPVILR	K	N	0.95	3.71	0.484	0	1	0	0	2	2080.07	167	184	TRUE	gi|356514615,gi|227305854,gi|356509819,gi|356552354
	Glycine dehydrogenase [decarboxylating], mitochondrial-like [Glycine max]	gi|356564051	NCBI_Gmax.fasta	114623	1	26	30	31	0.0232	0.344	TFCIPHGGGGPGMGPIGVK	K	K	0.95	3.19	0.38	0	0	1	0	2	1838.9	792	810	TRUE	gi|356514615,gi|227305854,gi|356509819,gi|356552354
	Glycine dehydrogenase [decarboxylating], mitochondrial-like [Glycine max]	gi|356564051	NCBI_Gmax.fasta	114623	1	26	30	31	0.0232	0.344	TFCIPHGGGGPGMGPIGVKK	K	H	0.95	3.67	0.607	0	1	1	0	2	1967	792	811	TRUE	gi|356514615,gi|227305854,gi|356509819,gi|356552354
	Glycine dehydrogenase [decarboxylating], mitochondrial-like [Glycine max]	gi|356564051	NCBI_Gmax.fasta	114623	1	26	30	31	0.0232	0.344	TFIIASNCHPQTIDICK	K	T	0.95	5.48	0.559	0	1	0	0	2	2017.98	255	271	TRUE	gi|227305854,gi|356552354
	Glycine dehydrogenase [decarboxylating], mitochondrial-like [Glycine max]	gi|356564051	NCBI_Gmax.fasta	114623	1	26	30	31	0.0232	0.344	VHGLAGAFALGLK	R	K	0.95	2.31	0.445	0	1	0	0	2	1253.74	448	460	TRUE	gi|227305854,gi|356552354
	Glycine dehydrogenase [decarboxylating], mitochondrial-like [Glycine max]	gi|356564051	NCBI_Gmax.fasta	114623	1	26	30	31	0.0232	0.344	VVDGNTITVAFDETTTLEDVDNLFK	R	V	0.95	3.99	0.553	0	1	1	0	2	2756.35	499	523	TRUE	gi|356514615,gi|227305854,gi|356509819,gi|356552354
	Glycine dehydrogenase [decarboxylating], mitochondrial-like [Glycine max]	gi|356564051	NCBI_Gmax.fasta	114623	1	26	30	31	0.0232	0.344	VVTADLKDIDYK	K	S	0.95	2.37	0.465	0	1	0	0	2	1379.74	281	292	TRUE	gi|227305854,gi|356552354
	Glycine dehydrogenase [decarboxylating], mitochondrial-like [Glycine max]	gi|356509819	NCBI_Gmax.fasta	111987	1	9	9	9	0.00675	0.297	DLSLCHSMIPLGSCTMK	K	L	0.95	4.15	0.54	0	2	0	0	2	1949.9	557	573	FALSE	gi|356514615,gi|227305854,gi|356564051,gi|356552354
	Glycine dehydrogenase [decarboxylating], mitochondrial-like [Glycine max]	gi|356509819	NCBI_Gmax.fasta	111987	1	9	9	9	0.00675	0.297	FGVPMGYGGPHAAFLATSQEYKR	R	M	0.95	5.22	0.608	0	1	0	0	2	2484.21	332	354	FALSE	gi|356514615,gi|227305854,gi|356564051,gi|356552354
	Glycine dehydrogenase [decarboxylating], mitochondrial-like [Glycine max]	gi|356509819	NCBI_Gmax.fasta	111987	1	9	9	9	0.00675	0.297	GVNGTVAHEFIIDLR	R	G	0.95	4.15	0.519	0	1	0	0	2	1640.88	869	883	FALSE	gi|227305854,gi|356564051,gi|356552354
	Glycine dehydrogenase [decarboxylating], mitochondrial-like [Glycine max]	gi|356509819	NCBI_Gmax.fasta	111987	1	9	9	9	0.00675	0.297	HLAPFLPSHPVVPTGGIPAPGK	K	S	0.95	4.09	0.623	0	0	1	0	2	2189.22	787	808	TRUE
	Glycine dehydrogenase [decarboxylating], mitochondrial-like [Glycine max]	gi|356509819	NCBI_Gmax.fasta	111987	1	9	9	9	0.00675	0.297	IIGVSVDSSGKPALR	R	M	0.95	3.17	0.505	0	1	0	0	2	1498.86	360	374	TRUE
	Glycine dehydrogenase [decarboxylating], mitochondrial-like [Glycine max]	gi|356509819	NCBI_Gmax.fasta	111987	1	9	9	9	0.00675	0.297	KLGTVEVQDHPFFDTVK	K	I	0.95	3.92	0.475	0	0	1	0	2	1960.02	436	452	TRUE	gi|356514615
	Glycine dehydrogenase [decarboxylating], mitochondrial-like [Glycine max]	gi|356509819	NCBI_Gmax.fasta	111987	1	9	9	9	0.00675	0.297	LGTVEVQDHPFFDTVK	K	I	0.95	3.8	0.643	0	1	0	0	2	1831.92	437	452	TRUE	gi|356514615
	Glycine dehydrogenase [decarboxylating], mitochondrial-like [Glycine max]	gi|356509819	NCBI_Gmax.fasta	111987	1	9	9	9	0.00675	0.297	MAQTCGFDSLDSLIDATVPK	K	S	0.95	5.85	0.698	0	1	0	0	2	2169.02	86	105	TRUE
	Glycine dehydrogenase [decarboxylating], mitochondrial-like [Glycine max]	gi|356509819	NCBI_Gmax.fasta	111987	1	9	9	9	0.00675	0.297	NIMENPAWYTQYTPYQAEISQGR	R	L	0.95	4.34	0.679	0	1	0	0	2	2760.27	160	182	FALSE	gi|356514615,gi|227305854,gi|356564051,gi|356552354
	Glycine dehydrogenase [decarboxylating], mitochondrial-like [Glycine max]	gi|356509819	NCBI_Gmax.fasta	111987	1	9	9	9	0.00675	0.297	NVCIIPVSAHGTNPASAAMCAMK	R	I	0.95	2.21	0.266	0	0	1	0	2	2400.13	654	676	TRUE	gi|356514615
	Glycine dehydrogenase [decarboxylating], mitochondrial-like [Glycine max]	gi|356509819	NCBI_Gmax.fasta	111987	1	9	9	9	0.00675	0.297	SYIGMGYYNTHVPPVILR	K	N	0.95	3.71	0.484	0	1	0	0	2	2080.07	142	159	FALSE	gi|356514615,gi|227305854,gi|356564051,gi|356552354
	Glycine dehydrogenase [decarboxylating], mitochondrial-like [Glycine max]	gi|356509819	NCBI_Gmax.fasta	111987	1	9	9	9	0.00675	0.297	TANAHAIADAACKNEINLR	R	V	0.95	4.48	0.642	0	0	1	0	2	2053.02	455	473	TRUE
	Glycine dehydrogenase [decarboxylating], mitochondrial-like [Glycine max]	gi|356509819	NCBI_Gmax.fasta	111987	1	9	9	9	0.00675	0.297	TFCIPHGGGGPGMGPIGVK	K	K	0.95	3.19	0.38	0	0	1	0	2	1838.9	767	785	FALSE	gi|356514615,gi|227305854,gi|356564051,gi|356552354
	Glycine dehydrogenase [decarboxylating], mitochondrial-like [Glycine max]	gi|356509819	NCBI_Gmax.fasta	111987	1	9	9	9	0.00675	0.297	TFCIPHGGGGPGMGPIGVKK	K	H	0.95	3.67	0.607	0	1	1	0	2	1967	767	786	FALSE	gi|356514615,gi|227305854,gi|356564051,gi|356552354
	Glycine dehydrogenase [decarboxylating], mitochondrial-like [Glycine max]	gi|356509819	NCBI_Gmax.fasta	111987	1	9	9	9	0.00675	0.297	TFIIASNCHPQTVDVCITR	K	A	0.95	3.39	0.575	0	0	1	0	2	2232.09	230	248	TRUE
	Glycine dehydrogenase [decarboxylating], mitochondrial-like [Glycine max]	gi|356509819	NCBI_Gmax.fasta	111987	1	9	9	9	0.00675	0.297	VVDGNTITVAFDETTTLEDVDNLFK	R	V	0.95	3.99	0.553	0	1	1	0	2	2756.35	474	498	FALSE	gi|356514615,gi|227305854,gi|356564051,gi|356552354
	Glycine dehydrogenase [decarboxylating], mitochondrial-like [Glycine max]	gi|356509819	NCBI_Gmax.fasta	111987	1	9	9	9	0.00675	0.297	VVMGTDLLALTVLKPPGEMGVDIVVGSAQR	K	F	0.95	4.01	0.555	0	0	1	0	2	3065.67	302	331	TRUE
Protein 3	Sucrose synthase [Glycine max]	gi|2606081,gi|351723161,gi|356565637,gi|3915873,gi|571533647	NCBI_Gmax.fasta	92245.7	1	6	6	6	0.0045	0.0795	ELQGKPDLIVGNYSDGNIVASLLAHK	K	L	0.95	4.31	0.576	0	0	1	0	2	2751.47	401	426	TRUE
	Sucrose synthase [Glycine max]	gi|2606081,gi|351723161,gi|356565637,gi|3915873,gi|571533647	NCBI_Gmax.fasta	92245.7	1	6	6	6	0.0045	0.0795	ELVNLVVVAGDR	R	R	0.95	2.26	0.42	0	1	0	0	2	1283.73	600	611	TRUE
	Sucrose synthase [Glycine max]	gi|2606081,gi|351723161,gi|356565637,gi|3915873,gi|571533647	NCBI_Gmax.fasta	92245.7	1	6	6	6	0.0045	0.0795	IEEKYTWQIYSQR	R	L	0.95	3.04	0.311	0	1	0	0	2	1743.87	747	759	TRUE
	Sucrose synthase [Glycine max]	gi|2606081,gi|351723161,gi|356565637,gi|3915873,gi|571533647	NCBI_Gmax.fasta	92245.7	1	6	6	6	0.0045	0.0795	LRELVNLVVVAGDR	K	R	0.95	4.3	0.574	0	1	0	0	2	1552.92	598	611	TRUE
	Sucrose synthase [Glycine max]	gi|2606081,gi|351723161,gi|356565637,gi|3915873,gi|571533647	NCBI_Gmax.fasta	92245.7	1	6	6	6	0.0045	0.0795	NITGLVEWYGK	K	N	0.95	2.39	0.472	0	2	0	0	2	1279.67	584	594	TRUE
Protein 4	WD40-like Beta Propeller/PROTEIN TAG-10, ISOFORM A [Glycine max]	gi|356518561	NCBI_Gmax.fasta	79931.6	1	6	6	6	0.0045	0.141	AILPSNAPFSVDSVFVER	R	V	0.95	3.94	0.552	0	1	0	0	2	1948.02	305	322	TRUE
	WD40-like Beta Propeller/PROTEIN TAG-10, ISOFORM A [Glycine max]	gi|356518561	NCBI_Gmax.fasta	79931.6	1	6	6	6	0.0045	0.141	ASWTAVYSTQLESGLTQR	R	L	0.95	3.59	0.508	0	1	0	0	2	1997.99	202	219	TRUE
	WD40-like Beta Propeller/PROTEIN TAG-10, ISOFORM A [Glycine max]	gi|356518561	NCBI_Gmax.fasta	79931.6	1	6	6	6	0.0045	0.141	GQDHWWSIYR	R	A	0.95	2.69	0.527	0	1	0	0	2	1347.62	295	304	TRUE
	WD40-like Beta Propeller/PROTEIN TAG-10, ISOFORM A [Glycine max]	gi|356518561	NCBI_Gmax.fasta	79931.6	1	6	6	6	0.0045	0.141	HIELFDLASNEFTELTR	R	L	0.95	5.62	0.628	0	1	0	0	2	2035.01	356	372	TRUE
	WD40-like Beta Propeller/PROTEIN TAG-10, ISOFORM A [Glycine max]	gi|356518561	NCBI_Gmax.fasta	79931.6	1	6	6	6	0.0045	0.141	VSNAMAFSTAWDR	K	V	0.95	2.79	0.51	0	1	0	0	2	1455.67	461	473	TRUE
	WD40-like Beta Propeller/PROTEIN TAG-10, ISOFORM A [Glycine max]	gi|356518561	NCBI_Gmax.fasta	79931.6	1	6	6	6	0.0045	0.141	VTPPGLHAFTPATSPGNNNFIAVATR	R	R	0.95	4.15	0.517	0	0	1	0	2	2650.37	323	348	TRUE
Protein 5	Tubulin beta-4 chain-like [Glycine max]	gi|356511255,gi|356513395,gi|356517897,gi|356528292,gi|356533102,gi|356535873,gi|356555918,gi|356571899,gi|356575969,gi|571470046,gi|571470409	NCBI_Gmax.fasta	50007.3	1	4	4	5	0.00375	0.128	GHYTEGAELIDSVLDVVRK	K	E	0.95	3.66	0.477	0	0	1	0	2	2101.09	104	122	TRUE
	Tubulin beta-4 chain-like [Glycine max]	gi|356511255,gi|356513395,gi|356517897,gi|356528292,gi|356533102,gi|356535873,gi|356555918,gi|356571899,gi|356575969,gi|571470046,gi|571470409	NCBI_Gmax.fasta	50007.3	1	4	4	5	0.00375	0.128	LAVNLIPFPR	K	L	0.95	3.12	0.443	0	1	0	0	2	1139.69	253	262	TRUE
	Tubulin beta-4 chain-like [Glycine max]	gi|356511255,gi|356513395,gi|356517897,gi|356528292,gi|356533102,gi|356535873,gi|356555918,gi|356571899,gi|356575969,gi|571470046,gi|571470409	NCBI_Gmax.fasta	50007.3	1	4	4	5	0.00375	0.128	LHFFMVGFAPLTSR	R	G	0.95	3.93	0.626	0	2	0	0	2	1622.85	263	276	TRUE
	Tubulin beta-4 chain-like [Glycine max]	gi|356511255,gi|356513395,gi|356517897,gi|356528292,gi|356533102,gi|356535873,gi|356555918,gi|356571899,gi|356575969,gi|571470046,gi|571470409	NCBI_Gmax.fasta	50007.3	1	4	4	5	0.00375	0.128	NSSYFVEWIPNNVK	K	S	0.95	3.32	0.484	0	1	0	0	2	1696.83	337	350	TRUE
Protein 6	ATP synthase alpha/beta family, nucleotide-binding domain (ATP-synt_ab) [Glycine max]	gi|227303916,gi|356536246,gi|356575611	NCBI_Gmax.fasta	59836.9	1	5	5	5	0.00375	0.131	AHGGFSVFAGVGER	K	T	0.95	3.66	0.486	0	1	0	0	2	1390.69	253	266	TRUE
	ATP synthase alpha/beta family, nucleotide-binding domain (ATP-synt_ab) [Glycine max]	gi|227303916,gi|356536246,gi|356575611	NCBI_Gmax.fasta	59836.9	1	5	5	5	0.00375	0.131	FTQANSEVSALLGR	R	I	0.95	3.96	0.513	0	1	0	0	2	1492.78	340	353	TRUE
	ATP synthase alpha/beta family, nucleotide-binding domain (ATP-synt_ab) [Glycine max]	gi|227303916,gi|356536246,gi|356575611	NCBI_Gmax.fasta	59836.9	1	5	5	5	0.00375	0.131	LVLEVAQHLGEGVVR	R	T	0.95	4.08	0.549	0	1	0	0	2	1618.93	122	136	TRUE
	ATP synthase alpha/beta family, nucleotide-binding domain (ATP-synt_ab) [Glycine max]	gi|227303916,gi|356536246,gi|356575611	NCBI_Gmax.fasta	59836.9	1	5	5	5	0.00375	0.131	MLSPLILGADHYETAR	R	G	0.95	2.71	0.255	0	1	0	0	2	1786.92	436	451	TRUE
	ATP synthase alpha/beta family, nucleotide-binding domain (ATP-synt_ab) [Glycine max]	gi|227303916,gi|356536246,gi|356575611	NCBI_Gmax.fasta	59836.9	1	5	5	5	0.00375	0.131	VLNTGSPITVPVGR	R	A	0.95	2.34	0.324	0	1	0	0	2	1409.81	152	165	TRUE
Protein 7	ATP synthase subunit alpha, mitochondrial [Glycine max]	gi|231585,gi|403311569,gi|403311573,gi|403311579,gi|476507691,gi|476507695,gi|476507701	NCBI_Gmax.fasta	55332.1	1	4	5	5	0.00375	0.114	EAFPGDVFYLHSR	R	L	0.95	2.34	0.295	0	1	0	0	2	1537.74	295	307	TRUE
	ATP synthase subunit alpha, mitochondrial [Glycine max]	gi|231585,gi|403311569,gi|403311573,gi|403311579,gi|476507691,gi|476507695,gi|476507701	NCBI_Gmax.fasta	55332.1	1	4	5	5	0.00375	0.114	GIRPAINVGLSVSR	R	V	0.95	3.11	0.548	0	1	0	0	2	1438.85	363	376	TRUE
	ATP synthase subunit alpha, mitochondrial [Glycine max]	gi|231585,gi|403311569,gi|403311573,gi|403311579,gi|476507691,gi|476507695,gi|476507701	NCBI_Gmax.fasta	55332.1	1	4	5	5	0.00375	0.114	LTEVLKQPQYAPLPIEK	R	Q	0.95	3.28	0.541	0	1	1	0	2	1967.12	427	443	TRUE
	ATP synthase subunit alpha, mitochondrial [Glycine max]	gi|231585,gi|403311569,gi|403311573,gi|403311579,gi|476507691,gi|476507695,gi|476507701	NCBI_Gmax.fasta	55332.1	1	4	5	5	0.00375	0.114	QVCGSLKLELAQYR	K	E	0.95	2.58	0.438	0	1	0	0	2	1664.88	388	401	TRUE
Protein 8	Pathogenesis-related protein Bet v I family (Bet_v_1) [Glycine max]	gi|255627117,gi|351726098	NCBI_Gmax.fasta	17762.1	1	4	4	4	0.003	0.451	FIFQAIDDNDHGGTIIK	K	W	0.95	3.29	0.456	0	1	0	0	2	1903.96	101	117	TRUE
	Pathogenesis-related protein Bet v I family (Bet_v_1) [Glycine max]	gi|255627117,gi|351726098	NCBI_Gmax.fasta	17762.1	1	4	4	4	0.003	0.451	ITTEIGVHATATK	K	W	0.95	3.32	0.478	0	1	0	0	2	1341.74	7	19	TRUE
	Pathogenesis-related protein Bet v I family (Bet_v_1) [Glycine max]	gi|255627117,gi|351726098	NCBI_Gmax.fasta	17762.1	1	4	4	4	0.003	0.451	VTTCLESIESIDEQSK	K	T	0.95	2.37	0.472	0	1	0	0	2	1838.87	66	81	TRUE
	Pathogenesis-related protein Bet v I family (Bet_v_1) [Glycine max]	gi|255627117,gi|351726098	NCBI_Gmax.fasta	17762.1	1	4	4	4	0.003	0.451	WFNLFATQLHHVQNLTDRVHGTK	K	L	0.95	3.8	0.466	0	0	1	0	2	2762.43	20	42	TRUE
Protein 9	Serine/threonine kinase receptor-associated protein // WD40 repeat protein [Glycine max]	gi|257347763,gi|257644556,gi|257737880,gi|363806668,gi|571514185	NCBI_Gmax.fasta	38506.5	1	3	4	4	0.003	0.139	AAFAVQGLDTTDLVALSGAHSFGR	K	A	0.95	5.04	0.675	0	1	1	0	2	2404.23	174	197	TRUE
	Serine/threonine kinase receptor-associated protein // WD40 repeat protein [Glycine max]	gi|257347763,gi|257644556,gi|257737880,gi|363806668,gi|571514185	NCBI_Gmax.fasta	38506.5	1	3	4	4	0.003	0.139	GLDVVNQIKTELEK	R	A	0.95	4.68	0.363	0	1	0	0	2	1585.88	100	113	TRUE
	Serine/threonine kinase receptor-associated protein // WD40 repeat protein [Glycine max]	gi|257347763,gi|257644556,gi|257737880,gi|363806668,gi|571514185	NCBI_Gmax.fasta	38506.5	1	3	4	4	0.003	0.139	TCPQVHFIVFK	K	V	0.95	2.18	0.372	0	1	0	0	2	1375.72	34	44	TRUE
Protein 10	Glyceraldehyde-3-dehydrogenase C subunit [Glycine max]	gi|351723699,gi|351727206,gi|356508778,gi|571451298,gi|85720768	NCBI_Gmax.fasta	36724.4	1	4	4	4	0.003	0.18	FGIVEGLMTTVHSITATQK	R	T	0.95	5.02	0.363	0	1	0	0	2	2033.07	170	188	TRUE
	Glyceraldehyde-3-dehydrogenase C subunit [Glycine max]	gi|351723699,gi|351727206,gi|356508778,gi|571451298,gi|85720768	NCBI_Gmax.fasta	36724.4	1	4	4	4	0.003	0.18	LVSWYDNEWGYSSR	K	V	0.95	3.72	0.629	0	1	0	0	2	1761.79	312	325	TRUE
	Glyceraldehyde-3-dehydrogenase C subunit [Glycine max]	gi|351723699,gi|351727206,gi|356508778,gi|571451298,gi|85720768	NCBI_Gmax.fasta	36724.4	1	4	4	4	0.003	0.18	VIDLLVFVAKK	R	S	0.95	2.8	0.437	0	1	0	0	2	1244.8	326	336	TRUE
	Glyceraldehyde-3-dehydrogenase C subunit [Glycine max]	gi|351723699,gi|351727206,gi|356508778,gi|571451298,gi|85720768	NCBI_Gmax.fasta	36724.4	1	4	4	4	0.003	0.18	VPTVDVSVVDLTVRLEK	R	E	0.95	4.47	0.582	0	1	0	0	2	1869.07	237	253	TRUE
Protein 11	Glycine hydroxymethyltransferase / Threonine aldolase [Glycine max]	gi|134273440,gi|222142535,gi|227307926,gi|296512835,gi|351724373,gi|571495664	NCBI_Gmax.fasta	57380.1	1	4	4	4	0.003	0.125	ILDLASITLNK	K	N	0.95	2.36	0.345	0	1	0	0	2	1200.72	422	432	TRUE
	Glycine hydroxymethyltransferase / Threonine aldolase [Glycine max]	gi|134273440,gi|222142535,gi|227307926,gi|296512835,gi|351724373,gi|571495664	NCBI_Gmax.fasta	57380.1	1	4	4	4	0.003	0.125	LVSGGSDNHLVLVDLRPSGLDGAR	K	V	0.95	2.54	0.254	0	0	1	0	2	2447.3	395	418	TRUE
	Glycine hydroxymethyltransferase / Threonine aldolase [Glycine max]	gi|134273440,gi|222142535,gi|227307926,gi|296512835,gi|351724373,gi|571495664	NCBI_Gmax.fasta	57380.1	1	4	4	4	0.003	0.125	SLELIASENFTSR	K	A	0.95	2.57	0.474	0	1	0	0	2	1466.75	102	114	TRUE
	Glycine hydroxymethyltransferase / Threonine aldolase [Glycine max]	gi|134273440,gi|222142535,gi|227307926,gi|296512835,gi|351724373,gi|571495664	NCBI_Gmax.fasta	57380.1	1	4	4	4	0.003	0.125	YYGGNEYIDELEILCQQR	R	A	0.95	5.05	0.604	0	1	0	0	2	2263.03	137	154	TRUE
Protein 12	Lipoxygenase [Glycine max]	gi|1173642,gi|351723975,gi|351727312,gi|439857,gi|585418	NCBI_Gmax.fasta	96352.6	1	4	4	4	0.003	0.0771	IFFANNTYLPSETPAPLLK	R	Y	0.95	4.59	0.64	0	1	0	0	2	2136.14	159	177	TRUE
	Lipoxygenase [Glycine max]	gi|1173642,gi|351723975,gi|351727312,gi|439857,gi|585418	NCBI_Gmax.fasta	96352.6	1	4	4	4	0.003	0.0771	LFILDHHDYLIPYLR	K	K	0.95	3.09	0.424	0	0	1	0	2	1928.04	422	436	TRUE
	Lipoxygenase [Glycine max]	gi|1173642,gi|351723975,gi|351727312,gi|439857,gi|585418	NCBI_Gmax.fasta	96352.6	1	4	4	4	0.003	0.0771	LYEGGVTLPTNFLSK	K	I	0.95	3.15	0.544	0	1	0	0	2	1638.87	308	322	TRUE
	Lipoxygenase [Glycine max]	gi|1173642,gi|351723975,gi|351727312,gi|439857,gi|585418	NCBI_Gmax.fasta	96352.6	1	4	4	4	0.003	0.0771	MPYTLLYPSSEEGLTFR	K	G	0.95	3.81	0.502	0	1	0	0	2	2003.98	832	848	TRUE
Protein 13	Glycine dehydrogenase (aminomethyl-transferring) / Glycine-cleavage complex P-protein [Glycine max]	gi|227305854,gi|356552354	NCBI_Gmax.fasta	114939	1	4	4	4	0.003	0.323	DLSLCHSMIPLGSCTMK	K	L	0.95	4.15	0.54	0	2	0	0	2	1949.9	585	601	FALSE	gi|356514615,gi|356564051,gi|356509819
	Glycine dehydrogenase (aminomethyl-transferring) / Glycine-cleavage complex P-protein [Glycine max]	gi|227305854,gi|356552354	NCBI_Gmax.fasta	114939	1	4	4	4	0.003	0.323	FGKFDAGLTENQMIEHMK	K	D	0.95	3	0.406	0	0	1	0	2	2095.99	142	159	TRUE
	Glycine dehydrogenase (aminomethyl-transferring) / Glycine-cleavage complex P-protein [Glycine max]	gi|227305854,gi|356552354	NCBI_Gmax.fasta	114939	1	4	4	4	0.003	0.323	FGVPMGYGGPHAAFLATSQEYKR	R	M	0.95	5.22	0.608	0	1	0	0	2	2484.21	360	382	FALSE	gi|356514615,gi|356564051,gi|356509819
	Glycine dehydrogenase (aminomethyl-transferring) / Glycine-cleavage complex P-protein [Glycine max]	gi|227305854,gi|356552354	NCBI_Gmax.fasta	114939	1	4	4	4	0.003	0.323	GAPHPPSLLMADAWTKPYSR	K	E	0.95	2.97	0.379	0	0	1	0	2	2195.11	990	1009	TRUE
	Glycine dehydrogenase (aminomethyl-transferring) / Glycine-cleavage complex P-protein [Glycine max]	gi|227305854,gi|356552354	NCBI_Gmax.fasta	114939	1	4	4	4	0.003	0.323	GVNGTVAHEFIIDLR	R	G	0.95	4.15	0.519	0	1	0	0	2	1640.88	897	911	FALSE	gi|356564051,gi|356509819
	Glycine dehydrogenase (aminomethyl-transferring) / Glycine-cleavage complex P-protein [Glycine max]	gi|227305854,gi|356552354	NCBI_Gmax.fasta	114939	1	4	4	4	0.003	0.323	IVSVGTDAKGNINIEELR	K	K	0.95	4.65	0.57	0	1	0	0	2	1928.04	705	722	FALSE	gi|356514615,gi|356564051
	Glycine dehydrogenase (aminomethyl-transferring) / Glycine-cleavage complex P-protein [Glycine max]	gi|227305854,gi|356552354	NCBI_Gmax.fasta	114939	1	4	4	4	0.003	0.323	IVSVGTDAKGNINIEELRK	K	A	0.95	2.74	0.506	0	0	1	0	2	2056.14	705	723	FALSE	gi|356514615,gi|356564051
	Glycine dehydrogenase (aminomethyl-transferring) / Glycine-cleavage complex P-protein [Glycine max]	gi|227305854,gi|356552354	NCBI_Gmax.fasta	114939	1	4	4	4	0.003	0.323	KSPYLTHPIFNTYQTEHELLR	R	Y	0.95	4	0.521	0	0	1	0	2	2587.33	556	576	TRUE
	Glycine dehydrogenase (aminomethyl-transferring) / Glycine-cleavage complex P-protein [Glycine max]	gi|227305854,gi|356552354	NCBI_Gmax.fasta	114939	1	4	4	4	0.003	0.323	LENYYPVLFR	R	G	0.95	1.83	0.344	0	1	0	0	2	1313.69	887	896	FALSE	gi|356564051
	Glycine dehydrogenase (aminomethyl-transferring) / Glycine-cleavage complex P-protein [Glycine max]	gi|227305854,gi|356552354	NCBI_Gmax.fasta	114939	1	4	4	4	0.003	0.323	MAESCGFGSLDSLVDATVPK	K	S	0.95	4.89	0.633	0	1	0	0	2	2083.97	114	133	TRUE
	Glycine dehydrogenase (aminomethyl-transferring) / Glycine-cleavage complex P-protein [Glycine max]	gi|227305854,gi|356552354	NCBI_Gmax.fasta	114939	1	4	4	4	0.003	0.323	NIMENPAWYTQYTPYQAEISQGR	R	L	0.95	4.34	0.679	0	1	0	0	2	2760.27	188	210	FALSE	gi|356514615,gi|356564051,gi|356509819
	Glycine dehydrogenase (aminomethyl-transferring) / Glycine-cleavage complex P-protein [Glycine max]	gi|227305854,gi|356552354	NCBI_Gmax.fasta	114939	1	4	4	4	0.003	0.323	NVCIIPVSAHGTNPASAAMCGMK	R	I	0.95	5.14	0.7	0	1	1	0	2	2386.11	682	704	FALSE	gi|356564051
	Glycine dehydrogenase (aminomethyl-transferring) / Glycine-cleavage complex P-protein [Glycine max]	gi|227305854,gi|356552354	NCBI_Gmax.fasta	114939	1	4	4	4	0.003	0.323	RLENYYPVLFR	K	G	0.95	4.23	0.602	0	1	0	0	2	1469.79	886	896	FALSE	gi|356564051
	Glycine dehydrogenase (aminomethyl-transferring) / Glycine-cleavage complex P-protein [Glycine max]	gi|227305854,gi|356552354	NCBI_Gmax.fasta	114939	1	4	4	4	0.003	0.323	SGDVCGVLVQYPGTEGEVLDYGEFVK	K	K	0.95	3.9	0.668	0	1	0	0	2	2817.33	296	321	FALSE	gi|356514615,gi|356564051
	Glycine dehydrogenase (aminomethyl-transferring) / Glycine-cleavage complex P-protein [Glycine max]	gi|227305854,gi|356552354	NCBI_Gmax.fasta	114939	1	4	4	4	0.003	0.323	SGDVCGVLVQYPGTEGEVLDYGEFVKK	K	A	0.95	2.94	0.401	0	0	1	0	2	2945.42	296	322	FALSE	gi|356564051
	Glycine dehydrogenase (aminomethyl-transferring) / Glycine-cleavage complex P-protein [Glycine max]	gi|227305854,gi|356552354	NCBI_Gmax.fasta	114939	1	4	4	4	0.003	0.323	SYIGMGYYNTHVPPVILR	K	N	0.95	3.71	0.484	0	1	0	0	2	2080.07	170	187	FALSE	gi|356514615,gi|356564051,gi|356509819
	Glycine dehydrogenase (aminomethyl-transferring) / Glycine-cleavage complex P-protein [Glycine max]	gi|227305854,gi|356552354	NCBI_Gmax.fasta	114939	1	4	4	4	0.003	0.323	TFCIPHGGGGPGMGPIGVK	K	K	0.95	3.19	0.38	0	0	1	0	2	1838.9	795	813	FALSE	gi|356514615,gi|356564051,gi|356509819
	Glycine dehydrogenase (aminomethyl-transferring) / Glycine-cleavage complex P-protein [Glycine max]	gi|227305854,gi|356552354	NCBI_Gmax.fasta	114939	1	4	4	4	0.003	0.323	TFCIPHGGGGPGMGPIGVKK	K	H	0.95	3.67	0.607	0	1	1	0	2	1967	795	814	FALSE	gi|356514615,gi|356564051,gi|356509819
	Glycine dehydrogenase (aminomethyl-transferring) / Glycine-cleavage complex P-protein [Glycine max]	gi|227305854,gi|356552354	NCBI_Gmax.fasta	114939	1	4	4	4	0.003	0.323	TFIIASNCHPQTIDICK	K	T	0.95	5.48	0.559	0	1	0	0	2	2017.98	258	274	FALSE	gi|356564051
	Glycine dehydrogenase (aminomethyl-transferring) / Glycine-cleavage complex P-protein [Glycine max]	gi|227305854,gi|356552354	NCBI_Gmax.fasta	114939	1	4	4	4	0.003	0.323	VHGLAGAFALGIK	R	K	0.95	2.31	0.445	0	2	0	0	2	1253.74	451	463	FALSE	gi|356564051
	Glycine dehydrogenase (aminomethyl-transferring) / Glycine-cleavage complex P-protein [Glycine max]	gi|227305854,gi|356552354	NCBI_Gmax.fasta	114939	1	4	4	4	0.003	0.323	VVDGNTITVAFDETTTLEDVDNLFK	R	V	0.95	3.99	0.553	0	1	1	0	2	2756.35	502	526	FALSE	gi|356514615,gi|356564051,gi|356509819
	Glycine dehydrogenase (aminomethyl-transferring) / Glycine-cleavage complex P-protein [Glycine max]	gi|227305854,gi|356552354	NCBI_Gmax.fasta	114939	1	4	4	4	0.003	0.323	VVTADLKDIDYK	K	S	0.95	2.37	0.465	0	1	0	0	2	1379.74	284	295	FALSE	gi|356564051
Protein 14	Elongation factor 1-alpha [Glycine max]	gi|1352345,gi|257717332,gi|257717372,gi|351734546,gi|571531942	NCBI_Gmax.fasta	49397.8	1	3	3	3	0.00225	0.0962	EHALLSFTLGVK	R	Q	0.95	1.92	0.405	0	1	0	0	2	1314.74	135	146	TRUE
	Elongation factor 1-alpha [Glycine max]	gi|1352345,gi|257717332,gi|257717372,gi|351734546,gi|571531942	NCBI_Gmax.fasta	49397.8	1	3	3	3	0.00225	0.0962	VHISIVVIGHVDSGK	K	S	0.95	4.75	0.742	0	1	0	0	2	1559.89	6	20	TRUE
	Elongation factor 1-alpha [Glycine max]	gi|1352345,gi|257717332,gi|257717372,gi|351734546,gi|571531942	NCBI_Gmax.fasta	49397.8	1	3	3	3	0.00225	0.0962	YYCTVIDAPGHRDFIK	K	N	0.95	2.27	0.327	0	0	1	0	2	1954.95	85	100	TRUE
Protein 15	Peroxidase / Lactoperoxidase [Glycine max]	gi|219905899,gi|219914348,gi|255638280,gi|257644564,gi|257651563,gi|358249064	NCBI_Gmax.fasta	38106.4	1	3	3	3	0.00225	0.148	GFDATDVVALSGAHTYGR	R	A	0.95	3.43	0.527	0	1	0	0	2	1836.89	185	202	TRUE
	Peroxidase / Lactoperoxidase [Glycine max]	gi|219905899,gi|219914348,gi|255638280,gi|257644564,gi|257651563,gi|358249064	NCBI_Gmax.fasta	38106.4	1	3	3	3	0.00225	0.148	QCLPVVSCSDILVIAAR	K	E	0.95	2.58	0.432	0	1	0	0	2	1901	120	136	TRUE
	Peroxidase / Lactoperoxidase [Glycine max]	gi|219905899,gi|219914348,gi|255638280,gi|257644564,gi|257651563,gi|358249064	NCBI_Gmax.fasta	38106.4	1	3	3	3	0.00225	0.148	TPVKFDNMYYINLLNR	R	Q	0.95	3.82	0.511	0	1	0	0	2	2001.03	246	261	TRUE
Protein 16	Actin-like ATPase domain [Glycine max]	gi|571453215,gi|571477240,gi|571477242,gi|571488614,gi|571492339,gi|571502842,gi|571502846,gi|571502850,gi|571515593,gi|571515597,gi|571515601	NCBI_Gmax.fasta	41595.5	0.998	2	3	3	0.00225	0.127	TTGIVLDSGDGVSHTVPIYEGYALPHAILR	R	L	0.95	5.17	0.618	0	0	1	0	2	3151.64	150	179	TRUE
	Actin-like ATPase domain [Glycine max]	gi|571453215,gi|571477240,gi|571477242,gi|571488614,gi|571492339,gi|571502842,gi|571502846,gi|571502850,gi|571515593,gi|571515597,gi|571515601	NCBI_Gmax.fasta	41595.5	0.998	2	3	3	0.00225	0.127	VAPEEHPVLLTEAPLNPK	R	A	0.95	3.39	0.513	0	1	1	0	2	1954.06	98	115	TRUE
Protein 17	BIFUNCTIONAL INHIBITOR/LIPID-TRANSFER PROTEIN/SEED STORAGE 2S ALBUMIN SUPERFAMILY PROTEIN [Glycine max]	gi|255633146,gi|255647364,gi|351725313,gi|359806142	NCBI_Gmax.fasta	13167.8	1	3	3	3	0.00225	0.346	GLADLEVAACLCTALK	K	A	0.95	3.86	0.54	0	1	0	0	2	1704.87	81	96	TRUE
	BIFUNCTIONAL INHIBITOR/LIPID-TRANSFER PROTEIN/SEED STORAGE 2S ALBUMIN SUPERFAMILY PROTEIN [Glycine max]	gi|255633146,gi|255647364,gi|351725313,gi|359806142	NCBI_Gmax.fasta	13167.8	1	3	3	3	0.00225	0.346	LGSPPTLPCCNLIK	K	G	0.95	2.13	0.288	0	1	0	0	2	1569.81	67	80	TRUE
	BIFUNCTIONAL INHIBITOR/LIPID-TRANSFER PROTEIN/SEED STORAGE 2S ALBUMIN SUPERFAMILY PROTEIN [Glycine max]	gi|255633146,gi|255647364,gi|351725313,gi|359806142	NCBI_Gmax.fasta	13167.8	1	3	3	3	0.00225	0.346	LGVCANVLNLVNVK	K	L	0.95	3.38	0.389	0	1	0	0	2	1512.86	53	66	TRUE
	BIFUNCTIONAL INHIBITOR/LIPID-TRANSFER PROTEIN/SEED STORAGE 2S ALBUMIN SUPERFAMILY PROTEIN [Glycine max]	gi|255647989,gi|356539207,gi|359807022	NCBI_Gmax.fasta	39143.2	0.998	2	2	2	0.0015	0.0833	IAVAQFPFMTVLGR	K	L	0.95	3.06	0.424	0	1	0	0	2	1549.86	319	332	TRUE
	BIFUNCTIONAL INHIBITOR/LIPID-TRANSFER PROTEIN/SEED STORAGE 2S ALBUMIN SUPERFAMILY PROTEIN [Glycine max]	gi|255647989,gi|356539207,gi|359807022	NCBI_Gmax.fasta	39143.2	0.998	2	2	2	0.0015	0.0833	SNIFAIGDITDVQEIK	K	Q	0.95	3.95	0.558	0	1	0	0	2	1762.92	257	272	TRUE
Protein 18	MALATE DEHYDROGENASE [Glycine max]	gi|257710881,gi|257710929,gi|356552916,gi|358248822	NCBI_Gmax.fasta	29355.1	0.998	2	2	2	0.0015	0.122	LAEQAERYEEMVEFMEK	K	V	0.95	4.5	0.54	0	1	0	0	2	2131.97	18	34	TRUE
	MALATE DEHYDROGENASE [Glycine max]	gi|257710881,gi|257710929,gi|356552916,gi|358248822	NCBI_Gmax.fasta	29355.1	0.998	2	2	2	0.0015	0.122	VSASAESEELTVEER	K	N	0.95	4.39	0.478	0	1	0	0	2	1635.77	35	49	TRUE
	MALATE DEHYDROGENASE [Glycine max]	gi|257645254,gi|257700462,gi|257700464,gi|257700504,gi|351727793,gi|366985127,gi|373432589,gi|42521311	NCBI_Gmax.fasta	35467.6	0.998	2	2	2	0.0015	0.108	VLVTGAAGQIGYALVPMIAR	R	G	0.95	2.77	0.396	0	1	0	0	2	2000.14	8	27	TRUE
	MALATE DEHYDROGENASE [Glycine max]	gi|257645254,gi|257700462,gi|257700464,gi|257700504,gi|351727793,gi|366985127,gi|373432589,gi|42521311	NCBI_Gmax.fasta	35467.6	0.998	2	2	2	0.0015	0.108	VLVVANPANTNALILK	K	E	0.95	2.39	0.368	0	1	0	0	2	1649.99	127	142	TRUE
	MALATE DEHYDROGENASE [Glycine max]	gi|257631758,gi|356553978,gi|356564154	NCBI_Gmax.fasta	52116.1	0.998	2	2	2	0.0015	0.0693	EFQLYVSGVFTGR	R	C	0.95	3.92	0.533	0	1	0	0	2	1502.76	288	300	TRUE
	MALATE DEHYDROGENASE [Glycine max]	gi|257631758,gi|356553978,gi|356564154	NCBI_Gmax.fasta	52116.1	0.998	2	2	2	0.0015	0.0693	VVSIDDYEDVPAYDELALKK	K	A	0.95	3.18	0.457	0	1	0	0	2	2282.14	252	271	TRUE
Protein 19	Linoleate 9-lipoxygenase [Glycine max]	gi|118138512,gi|118138513,gi|126411,gi|18746,gi|242462,gi|351726848,gi|436169	NCBI_Gmax.fasta	96813.6	0.998	2	2	2	0.0015	0.0278	SLSHDVIPLFK	K	S	0.95	2.78	0.384	0	1	0	0	2	1255.7	284	294	TRUE
	Linoleate 9-lipoxygenase [Glycine max]	gi|118138512,gi|118138513,gi|126411,gi|18746,gi|242462,gi|351726848,gi|436169	NCBI_Gmax.fasta	96813.6	0.998	2	2	2	0.0015	0.0278	TGPVQLPYTLLHR	R	S	0.95	2.72	0.527	0	1	0	0	2	1494.84	835	847	TRUE
	Linoleate 9-lipoxygenase [Glycine max]	gi|208964722,gi|208964724,gi|288311314,gi|351725976,gi|351726363,gi|356552478,gi|358248990,gi|571541099	NCBI_Gmax.fasta	80469.1	0.998	2	2	2	0.0015	0.0357	GIVDSEDLPLNISR	K	E	0.95	3.38	0.517	0	1	0	0	2	1527.8	358	371	TRUE
	Linoleate 9-lipoxygenase [Glycine max]	gi|208964722,gi|208964724,gi|288311314,gi|351725976,gi|351726363,gi|356552478,gi|358248990,gi|571541099	NCBI_Gmax.fasta	80469.1	0.998	2	2	2	0.0015	0.0357	HFSVEGQLEFK	K	A	0.95	2.51	0.396	0	1	0	0	2	1320.66	299	309	TRUE
Protein 20	Glycine dehydrogenase [decarboxylating] [Glycine max]	gi|356514615	NCBI_Gmax.fasta	111038	0.998	2	2	2	0.0015	0.241	DLSLCHSMIPLGSCTMK	K	L	0.95	4.15	0.54	0	2	0	0	2	1949.9	549	565	FALSE	gi|227305854,gi|356564051,gi|356509819,gi|356552354
	Glycine dehydrogenase [decarboxylating] [Glycine max]	gi|356514615	NCBI_Gmax.fasta	111038	0.998	2	2	2	0.0015	0.241	FGVPMGYGGPHAAFLATSQEYKR	R	M	0.95	5.22	0.608	0	1	0	0	2	2484.21	324	346	FALSE	gi|227305854,gi|356564051,gi|356509819,gi|356552354
	Glycine dehydrogenase [decarboxylating] [Glycine max]	gi|356514615	NCBI_Gmax.fasta	111038	0.998	2	2	2	0.0015	0.241	IIGVSVDSGGKPALR	R	M	0.95	3.23	0.529	0	1	0	0	2	1468.85	352	366	TRUE
	Glycine dehydrogenase [decarboxylating] [Glycine max]	gi|356514615	NCBI_Gmax.fasta	111038	0.998	2	2	2	0.0015	0.241	IVSVGTDAKGNINIEELR	K	K	0.95	4.65	0.57	0	1	0	0	2	1928.04	669	686	FALSE	gi|227305854,gi|356564051,gi|356552354
	Glycine dehydrogenase [decarboxylating] [Glycine max]	gi|356514615	NCBI_Gmax.fasta	111038	0.998	2	2	2	0.0015	0.241	IVSVGTDAKGNINIEELRK	K	A	0.95	2.74	0.506	0	0	1	0	2	2056.14	669	687	FALSE	gi|227305854,gi|356564051,gi|356552354
	Glycine dehydrogenase [decarboxylating] [Glycine max]	gi|356514615	NCBI_Gmax.fasta	111038	0.998	2	2	2	0.0015	0.241	KLGTVEVQDHPFFDTVK	K	I	0.95	3.92	0.475	0	0	1	0	2	1960.02	428	444	FALSE	gi|356509819
	Glycine dehydrogenase [decarboxylating] [Glycine max]	gi|356514615	NCBI_Gmax.fasta	111038	0.998	2	2	2	0.0015	0.241	LGTVEVQDHPFFDTVK	K	I	0.95	3.8	0.643	0	1	0	0	2	1831.92	429	444	FALSE	gi|356509819
	Glycine dehydrogenase [decarboxylating] [Glycine max]	gi|356514615	NCBI_Gmax.fasta	111038	0.998	2	2	2	0.0015	0.241	NIMENPAWYTQYTPYQAEISQGR	R	L	0.95	4.34	0.679	0	1	0	0	2	2760.27	152	174	FALSE	gi|227305854,gi|356564051,gi|356509819,gi|356552354
	Glycine dehydrogenase [decarboxylating] [Glycine max]	gi|356514615	NCBI_Gmax.fasta	111038	0.998	2	2	2	0.0015	0.241	NSPYLTHPIFNTYHTEHEVLR	R	Y	0.95	3.28	0.357	0	0	1	0	2	2568.26	520	540	TRUE
	Glycine dehydrogenase [decarboxylating] [Glycine max]	gi|356514615	NCBI_Gmax.fasta	111038	0.998	2	2	2	0.0015	0.241	NVCIIPVSAHGTNPASAAMCAMK	R	I	0.95	2.21	0.266	0	0	1	0	2	2400.13	646	668	FALSE	gi|356509819
	Glycine dehydrogenase [decarboxylating] [Glycine max]	gi|356514615	NCBI_Gmax.fasta	111038	0.998	2	2	2	0.0015	0.241	SGDVCGVLVQYPGTEGEVLDYGEFVK	K	E	0.95	3.9	0.668	0	1	0	0	2	2817.33	260	285	FALSE	gi|227305854,gi|356564051,gi|356552354
	Glycine dehydrogenase [decarboxylating] [Glycine max]	gi|356514615	NCBI_Gmax.fasta	111038	0.998	2	2	2	0.0015	0.241	SYIGMGYYNTHVPPVILR	K	N	0.95	3.71	0.484	0	1	0	0	2	2080.07	134	151	FALSE	gi|227305854,gi|356564051,gi|356509819,gi|356552354
	Glycine dehydrogenase [decarboxylating] [Glycine max]	gi|356514615	NCBI_Gmax.fasta	111038	0.998	2	2	2	0.0015	0.241	TFCIPHGGGGPGMGPIGVK	K	K	0.95	3.19	0.38	0	0	1	0	2	1838.9	759	777	FALSE	gi|227305854,gi|356564051,gi|356509819,gi|356552354
	Glycine dehydrogenase [decarboxylating] [Glycine max]	gi|356514615	NCBI_Gmax.fasta	111038	0.998	2	2	2	0.0015	0.241	TFCIPHGGGGPGMGPIGVKK	K	H	0.95	3.67	0.607	0	1	1	0	2	1967	759	778	FALSE	gi|227305854,gi|356564051,gi|356509819,gi|356552354
	Glycine dehydrogenase [decarboxylating] [Glycine max]	gi|356514615	NCBI_Gmax.fasta	111038	0.998	2	2	2	0.0015	0.241	VVDGNTITVAFDETTTLEDVDNLFK	R	V	0.95	3.99	0.553	0	1	1	0	2	2756.35	466	490	FALSE	gi|227305854,gi|356564051,gi|356509819,gi|356552354
Protein 21	NADP-dependent malic enzyme-like [Glycine max]	gi|356558908,gi|571449771,gi|571449773,gi|571456778,gi|571459595,gi|571459597,gi|571459599,gi|571459601	NCBI_Gmax.fasta	72040.8	0.998	2	2	2	0.0015	0.0508	ILGLGDLGCQGMGIPVGK	R	L	0.95	2.48	0.354	0	1	0	0	2	1784.94	221	238	TRUE
	NADP-dependent malic enzyme-like [Glycine max]	gi|356558908,gi|571449771,gi|571449773,gi|571456778,gi|571459595,gi|571459597,gi|571459599,gi|571459601	NCBI_Gmax.fasta	72040.8	0.998	2	2	2	0.0015	0.0508	SIQVIVVTDGER	K	I	0.95	2.43	0.538	0	1	0	0	2	1315.72	209	220	TRUE
Protein 22	RIBOSOMAL PROTEIN S5-1-RELATED [Glycine max]	gi|255626917,gi|255640486,gi|255640594,gi|351726818,gi|356500397,gi|356530665,gi|574584651	NCBI_Gmax.fasta	14100	0.998	2	2	2	0.0015	0.137	TIAECLADELINAAK	K	G	0.95	3.46	0.425	0	1	0	0	2	1631.83	92	106	TRUE
	RIBOSOMAL PROTEIN S5-1-RELATED [Glycine max]	gi|255626917,gi|255640486,gi|255640594,gi|351726818,gi|356500397,gi|356530665,gi|574584651	NCBI_Gmax.fasta	14100	0.998	2	2	2	0.0015	0.137	VNQAIYLLTTGAR	R	E	0.95	3.2	0.506	0	1	0	0	2	1419.8	71	83	TRUE
Protein 23	NAD(P)H dehydrogenase (quinone) / Vitamin-K reductase [Glycine max]	gi|257652451,gi|257689839,gi|257689927,gi|257689933,gi|351727803,gi|356554929,gi|571516470	NCBI_Gmax.fasta	21667.1	1	2	2	2	0.0015	0.143	LWQVPETLPEEVLAK	K	L	0.95	2.99	0.497	0	1	0	0	2	1751.96	37	51	TRUE
	NAD(P)H dehydrogenase (quinone) / Vitamin-K reductase [Glycine max]	gi|257652451,gi|257689839,gi|257689927,gi|257689933,gi|351727803,gi|356554929,gi|571516470	NCBI_Gmax.fasta	21667.1	1	2	2	2	0.0015	0.143	VYIVYYSTYGHVEK	K	L	0.95	4.32	0.541	0	1	0	0	2	1720.86	5	18	TRUE
Protein 24	Cytosolic glutamine synthetase GSbeta1 [Glycine max]	gi|10946357,gi|121336,gi|255645187,gi|255645255,gi|256143,gi|298532538,gi|298556684,gi|351722651,gi|363807092,gi|571486515	NCBI_Gmax.fasta	40212.2	0.998	2	2	2	0.0015	0.0899	HETADINTFLWGVANR	R	G	0.95	5.23	0.526	0	1	0	0	2	1843.91	306	321	TRUE
	Cytosolic glutamine synthetase GSbeta1 [Glycine max]	gi|10946357,gi|121336,gi|255645187,gi|255645255,gi|256143,gi|298532538,gi|298556684,gi|351722651,gi|363807092,gi|571486515	NCBI_Gmax.fasta	40212.2	0.998	2	2	2	0.0015	0.0899	VIAEYIWIGGSGMDLR	K	S	0.95	4.24	0.271	0	1	0	0	2	1779.91	19	34	TRUE
Protein 25	SERINE HYDROXYMETHYLTRANSFERASE 1 [Glycine max]	gi|296512833,gi|296512841,gi|351722703,gi|571468907,gi|571541380	NCBI_Gmax.fasta	57379.1	0.998	2	2	2	0.0015	0.208	AYQEQVLSNSFK	R	F	0.95	3.11	0.37	0	1	0	0	2	1413.7	355	366	TRUE
	SERINE HYDROXYMETHYLTRANSFERASE 1 [Glycine max]	gi|296512833,gi|296512841,gi|351722703,gi|571468907,gi|571541380	NCBI_Gmax.fasta	57379.1	0.998	2	2	2	0.0015	0.208	IMALDLPHGGHLSHGYQTDTK	R	K	0.95	3.17	0.523	0	0	1	0	2	2291.12	168	188	FALSE	gi|356500779,gi|356552984,gi|296512839
	SERINE HYDROXYMETHYLTRANSFERASE 1 [Glycine max]	gi|296512833,gi|296512841,gi|351722703,gi|571468907,gi|571541380	NCBI_Gmax.fasta	57379.1	0.998	2	2	2	0.0015	0.208	IMALDLPHGGHLSHGYQTDTKK	R	I	0.95	3.36	0.395	0	0	1	0	2	2419.22	168	189	FALSE	gi|356500779,gi|356552984,gi|296512839
	SERINE HYDROXYMETHYLTRANSFERASE 1 [Glycine max]	gi|296512833,gi|296512841,gi|351722703,gi|571468907,gi|571541380	NCBI_Gmax.fasta	57379.1	0.998	2	2	2	0.0015	0.208	ISAVSIFFETMPYR	K	L	0.95	4.19	0.624	0	2	0	0	2	1660.84	190	203	FALSE	gi|356500779,gi|356552984,gi|296512839
	SERINE HYDROXYMETHYLTRANSFERASE 1 [Glycine max]	gi|296512833,gi|296512841,gi|351722703,gi|571468907,gi|571541380	NCBI_Gmax.fasta	57379.1	0.998	2	2	2	0.0015	0.208	KISAVSIFFETMPYR	K	L	0.95	5.07	0.561	0	2	0	0	2	1788.94	189	203	FALSE	gi|356500779,gi|356552984,gi|296512839
	SERINE HYDROXYMETHYLTRANSFERASE 1 [Glycine max]	gi|296512833,gi|296512841,gi|351722703,gi|571468907,gi|571541380	NCBI_Gmax.fasta	57379.1	0.998	2	2	2	0.0015	0.208	LNESTGYIDYDQMEK	R	S	0.95	3.67	0.607	0	1	0	0	2	1805.79	204	218	TRUE
	SERINE HYDROXYMETHYLTRANSFERASE 1 [Glycine max]	gi|296512833,gi|296512841,gi|351722703,gi|571468907,gi|571541380	NCBI_Gmax.fasta	57379.1	0.998	2	2	2	0.0015	0.208	NTVPGDVSAMVPGGIR	K	M	0.95	2.75	0.478	0	1	0	0	2	1585.8	416	431	FALSE	gi|356500779,gi|356552984,gi|296512839
	SERINE HYDROXYMETHYLTRANSFERASE 1 [Glycine max]	gi|296512833,gi|296512841,gi|351722703,gi|571468907,gi|571541380	NCBI_Gmax.fasta	57379.1	0.998	2	2	2	0.0015	0.208	VLEAVHIAANK	K	N	0.95	3	0.496	0	1	0	0	2	1164.67	405	415	FALSE	gi|356500779,gi|356552984,gi|296512839
	SERINE HYDROXYMETHYLTRANSFERASE 1 [Glycine max]	gi|296512833,gi|296512841,gi|351722703,gi|571468907,gi|571541380	NCBI_Gmax.fasta	57379.1	0.998	2	2	2	0.0015	0.208	VLEAVHIAANKNTVPGDVSAMVPGGIR	K	M	0.95	5.09	0.635	0	0	2	1	2	2731.46	405	431	FALSE	gi|356500779,gi|356552984,gi|296512839
	SERINE HYDROXYMETHYLTRANSFERASE 1 [Glycine max]	gi|296512833,gi|296512841,gi|351722703,gi|571468907,gi|571541380	NCBI_Gmax.fasta	57379.1	0.998	2	2	2	0.0015	0.208	YYGGNEYIDMAETLCQK	R	R	0.95	5.49	0.63	0	1	0	0	2	2054.88	112	128	FALSE	gi|356500779,gi|356552984,gi|296512839
	SERINE HYDROXYMETHYLTRANSFERASE 1 [Glycine max]	gi|296512833,gi|296512841,gi|351722703,gi|571468907,gi|571541380	NCBI_Gmax.fasta	57379.1	0.998	2	2	2	0.0015	0.208	YYGGNEYIDMAETLCQKR	R	A	0.95	3.92	0.66	0	1	1	0	2	2210.98	112	129	FALSE	gi|356500779,gi|356552984,gi|296512839
Protein 26	HEAT SHOCK 70 KDA PROTEIN 5	gi|356523657,gi|571456873	NCBI_Gmax.fasta	73479.3	0.998	1	1	1	0.00075	0.0255	IINEPTAAAIAYGLDKK	R	G	0.95	3.76	0.486	0	1	0	0	2	1787.99	204	220	TRUE
END OF FILE

## Sheet: Forrest LC-MS SCN non-infected
MS/MS sample name	Protein name	Protein accession numbers	Database sources	Protein molecular weight (Da)	Protein identification probability	Number of unique peptides	Number of unique spectra	Number of total spectra	Percentage of total spectra	Percentage sequence coverage	Peptide sequence	Previous amino acid	Next amino acid	Best Peptide identification probability	Best SEQUEST XCorr score	Best SEQUEST DCn score	Number of identified +1H spectra	Number of identified +2H spectra	Number of identified +3H spectra	Number of identified +4H spectra	Number of enzymatic termini	Calculated +1H Peptide Mass (AMU)	Peptide start index	Peptide stop index	Assigned	Other Proteins
Protein 1	Serine hydroxymethyltransferase [Glycine max]	gi|296512837,gi|296512839,gi|356500779,gi|356552984	NCBI_Gmax.fasta	56943.4	1	3	3	3	0.00185	0.0915	LIVAGASAYAR	K	L	0.95	3.26	0.514	0	1	0	0	2	1091.62	223	233	TRUE
	Serine hydroxymethyltransferase [Glycine max]	gi|296512837,gi|296512839,gi|356500779,gi|356552984	NCBI_Gmax.fasta	56943.4	1	3	3	3	0.00185	0.0915	LNESTGYIDYDQLEK	R	S	0.95	4.18	0.554	0	1	0	0	2	1787.83	200	214	TRUE

## Sheet: Essex LC-MS SCN non-infected
MS/MS sample name	Protein name	Protein accession numbers	Database sources	Protein molecular weight (Da)	Protein identification probability	Number of unique peptides	Number of unique spectra	Number of total spectra	Percentage of total spectra	Percentage sequence coverage	Peptide sequence	Previous amino acid	Next amino acid	Best Peptide identification probability	Best SEQUEST XCorr score	Best SEQUEST DCn score	Number of identified +1H spectra	Number of identified +2H spectra	Number of identified +3H spectra	Number of identified +4H spectra	Number of enzymatic termini	Calculated +1H Peptide Mass (AMU)	Peptide start index	Peptide stop index	Assigned	Other Proteins
Protein 1	Serine hydroxymethyltransferase [Glycine max]	gi|296512837,gi|296512839,gi|356500779,gi|356552984	NCBI_Gmax.fasta	56943.4	1	3	3	3	0.00185	0.0915	NTVPGDVSAMVPGGIR	K	M	0.95	2.12	0.419	0	1	0	0	2	1569.81	412	427	TRUE
