# Supplementary material for: Proteomic, Transcriptomic, Mutational, and Functional Assays Reveal the Involvement of Both THF and PLP Sites at the GmSHMT08 in Resistance to Soybean Cyst Nematode
Source: Int J Mol Sci. 2022 Sep 24;23(19):11278. doi: 10.3390/ijms231911278 (PMC9570156; doi:10.3390/ijms231911278)
Supplement: Supplementary file 1 [file ijms-23-11278-s001.zip › Meksem Supplemental Table S2.xlsx]

## Sheet: Sheet1
Gene annotation	Glyma number	Start	End	QTL ID	Start of the QTL	End of the QTL	Distance to the QTL (Mbp)	Citations	References
1. Redox hemeostasis
Glutathione S-Transferase, GST	Glyma.07G140400	16641129	16643278	SCN 3-4	16521027	18352609		Webb et al. 1995	Webb, D.M., Baltazar, B.M., Rao-Arelli, A.P. et al. Genetic mapping of soybean cyst nematode race-3 resistance loci in the soybean PI 437.654. Theoret. Appl. Genetics 91, 574–581 (1995). https://doi.org/10.1007/BF00223282
	Glyma.07G139700	16580992	16582517	SCN 3-3	16521027	18352609		Webb et al. 1995	Webb, D.M., Baltazar, B.M., Rao-Arelli, A.P. et al. Genetic mapping of soybean cyst nematode race-3 resistance loci in the soybean PI 437.654. Theoret. Appl. Genetics 91, 574–581 (1995). https://doi.org/10.1007/BF00223282
	Glyma.07G140700	16662591	16663988	SCN 3-5	16521027	18352609		Webb et al. 1995	Webb, D.M., Baltazar, B.M., Rao-Arelli, A.P. et al. Genetic mapping of soybean cyst nematode race-3 resistance loci in the soybean PI 437.654. Theoret. Appl. Genetics 91, 574–581 (1995). https://doi.org/10.1007/BF00223282
	Glyma.07G273500	44538162	44540967	SCN 40-4	37079608	40919537	3.6	Ferreira et al. 2011	Ferreira, M., Cervigni, G., Ferreira, A., Schuster, I., Santana, F., Pereira, W., Barros, E., Moreira, M. QTL for resistance to soybean cyst nematode races 3, 9, and 14 in cultivar Hartwig. Pesq. Agro. Bras. 2011, 46(4):420-428
NAD(P)H dehydrogenase, NAD(P)HDH	Glyma.13G249600	35726229	35729214	NA
	Glyma.15G064700	4918630	4921488	SCN 12-2	5104450	5215740		Qiu et al. 1999	Qiu, B.X., Arelli, P.R., Sleper, D.A. RFLP markers associated with soybean cyst nematode resistance and seed composition in a 'Peking' x 'Essex' population. Theor. Appl. Genet. 1999, 98(3-4):356-364
Glutathione peroxidase, GPx	Glyma.16G164400	32320351	32323318	SCN 38-3	30404629	33818897		Chang et al. 2011	Chang, W., Dong, L., Wang, Z. et al. QTL underlying resistance to two HG types of Heterodera glycines found in soybean cultivar 'L-10'. BMC Genomics 12, 233 (2011). https://doi.org/10.1186/1471-2164-12-233
				SCN 38-7	30404629	33818897		Chang et al. 2011	Chang, W., Dong, L., Wang, Z. et al. QTL underlying resistance to two HG types of Heterodera glycines found in soybean cultivar 'L-10'. BMC Genomics 12, 233 (2011). https://doi.org/10.1186/1471-2164-12-233
				SCN 40-3	28944536	30404629		Ferreira et al. 2011	Ferreira, M., Cervigni, G., Ferreira, A., Schuster, I., Santana, F., Pereira, W., Barros, E., Moreira, M. QTL for resistance to soybean cyst nematode races 3, 9, and 14 in cultivar Hartwig. Pesq. Agro. Bras. 2011, 46(4):420-428
	Glyma.02G052700	4820442	4822665	NA
	Glyma.05G103600	27608668	27612225	SCN 18-1	14845260	34385798		Yue et al. 2001	Yue, P., Arelli, P. & Sleper, D. Molecular characterization of resistance to Heterodera glycines in soybean PI 438489B. Theor Appl Genet 102, 921–928 (2001). https://doi.org/10.1007/s001220000453
Glutamate dehydrogenase, GDH	Glyma.16G041200	3861427	3869280	SCN 46-7	133118	2762849	1.09	Abdelmajid et al. 2014a	Abdelmajid, K., Ramos, L., Hyten, D., Bond, J., Bendahmane, A., Arelli, P., Njiti, V., Cianzio, S., Kantartzi, S., Meksem, K. Quantitative Trait Loci (QTL) that Underlie SCN Resistance in Soybean [Glycine max (L.) Merr.] PI438489B by ‘Hamilton’ Recombinant Inbred Line (RIL) Population. Atlas Journal of Plant Biology. 2014, 1(3):29-38
	Glyma.19G111000	36534479	36539096	NA
2. Glycolysis
Glutamyl-tRNAGlu reductase, GluTR	Glyma.08G064700	4956340	4959142	SCN 1-1	4217746	5182879		Concibido et al. 1994	Concibido, V.C., Denny, R.L., Boutin, S.R., Hautea, R., Orf, J.H., Young, N.D. DNA marker analysis of loci underlying resistance to soybean cyst nematode (Heterodera glycines Ichinohe). Crop Sci. 1994, 34(1):240-246
				SCN 33-2	3993698	8223512		Guo et al. 2006	Guo, B., Sleper, D., Nguyen, H., Arelli, P., Shannon, J. Quantitative Trait Loci Underlying Resistance to Three Soybean Cyst Nematode Populations in Soybean PI 404198A. Crop Sci. 2006, 46(1):224-233
Glutamine synthase, GS	Glyma.11G215500	30885378	30889724	SCN 17-1	27790963	32411307		Yue et al. 2001	Yue, P., Arelli, P. & Sleper, D. Molecular characterization of resistance to Heterodera glycines in soybean PI 438489B. Theor Appl Genet 102, 921–928 (2001). https://doi.org/10.1007/s001220000453
				SCN 18-2	27790963	32411307		Yue et al. 2001	Yue, P., Arelli, P. & Sleper, D. Molecular characterization of resistance to Heterodera glycines in soybean PI 438489B. Theor Appl Genet 102, 921–928 (2001). https://doi.org/10.1007/s001220000453
				SCN 20-1	27790963	32411307		Yue et al. 2001	Yue, P., Arelli, P. & Sleper, D. Molecular characterization of resistance to Heterodera glycines in soybean PI 438489B. Theor Appl Genet 102, 921–928 (2001). https://doi.org/10.1007/s001220000453
				SCN 39-2	29759281	32194459		Wu et al. 2009	Wu, X., Blake, S., Sleper, D., Shannon, J., Cregan, P., Nguyen, H. QTL, additive and epistatic effects for SCN resistance in PI 437654. Theor. Appl. Genet. 2009, 118(6):1093-1105.
	Glyma.18G041100	3470598	3474961	SCN 3-2	2675309	3626442		Webb et al. 1995	Webb, D.M., Baltazar, B.M., Rao-Arelli, A.P. et al. Genetic mapping of soybean cyst nematode race-3 resistance loci in the soybean PI 437.654. Theoret. Appl. Genetics 91, 574–581 (1995). https://doi.org/10.1007/BF00223282
				SCN 8-1	2419864	3172879		Chang et al. 1997	Chang, S.J.C., Doubler, T.W., Kilo, V.Y., Abu-Thredeih, J., Prabhu, R., Freire, V., Suttner, R., Klein, J., Schmidt, M.E., Gibson, P.T., Lightfoot, D.A. Association of loci underlying field-resistance to soybean sudden-death syndrome (SDS) and cyst-nematode (SCN) RACE-3. Crop Sci. 1997, 37(3):966-971
				SCN 29-4	949928	3275857		Guo et al. 2006	Guo, B., Sleper, D.A., Arelli, P.R., Shannon, J.G., Nguyen, H.T. Identification of QTLs associated with resistance to soybean cyst nematode races 2, 3 and 5 in soybean PI 90763. Theor. Appl. Genet. 2005, 103(8):1167-1173
				SCN 29-8	949928	3275857		Guo et al. 2006	Guo, B., Sleper, D.A., Arelli, P.R., Shannon, J.G., Nguyen, H.T. Identification of QTLs associated with resistance to soybean cyst nematode races 2, 3 and 5 in soybean PI 90763. Theor. Appl. Genet. 2005, 103(8):1167-1173
				SCN 33-1	1736692	3275857		Guo et al. 2006	Guo, B., Sleper, D., Nguyen, H., Arelli, P., Shannon, J. Quantitative Trait Loci Underlying Resistance to Three Soybean Cyst Nematode Populations in Soybean PI 404198A
				SCN 37-3	1621602	6207617		Vuong et al. 2010	Vuong, T., Sleper, D., Shannon, J., Nguyen, H. Novel quantitative trait loci for broad-based resistance to soybean cyst nematode (Heterodera glycines Ichinohe) in soybean PI 567516C. Theor. Appl. Genet. 2010, 121(7):1253-1266.
				SCN 42-4	2418920	4713017		Ariagada et al. 2012	Arriagada, O., Mora, F., Dellarosa, J., Ferreira, M., Cervigni, G., Schuster, I. Bayesian mapping of quantitative trait loci (QTL) controlling soybean cyst nematode resistant. Euph. 2012, 186(3):907-917
				SCN 43-1	949928	6853467		Jiao et al. 2015A	Jiao, Y., Vuong, T., Liu, Y., Meinhardt, C., Liu, Y., Joshi, T., Cregan, P., Xu, D., Shannon, J., Nguyen, H. Identification and evaluation of quantitative trait loci underlying resistance to multiple HG types of soybean cyst nematode. Theor. Appl. Genet. 2015, 128(1):15-23
				SCN 43-3	949928	6853467		Jiao et al. 2015A	Jiao, Y., Vuong, T., Liu, Y., Meinhardt, C., Liu, Y., Joshi, T., Cregan, P., Xu, D., Shannon, J., Nguyen, H. Identification and evaluation of quantitative trait loci underlying resistance to multiple HG types of soybean cyst nematode. Theor. Appl. Genet. 2015, 128(1):15-23
				SCN 43-5	949928	6853467		Jiao et al. 2015A	Jiao, Y., Vuong, T., Liu, Y., Meinhardt, C., Liu, Y., Joshi, T., Cregan, P., Xu, D., Shannon, J., Nguyen, H. Identification and evaluation of quantitative trait loci underlying resistance to multiple HG types of soybean cyst nematode. Theor. Appl. Genet. 2015, 128(1):15-23
				SCN 43-7	949928	6853467		Jiao et al. 2015A	Jiao, Y., Vuong, T., Liu, Y., Meinhardt, C., Liu, Y., Joshi, T., Cregan, P., Xu, D., Shannon, J., Nguyen, H. Identification and evaluation of quantitative trait loci underlying resistance to multiple HG types of soybean cyst nematode. Theor. Appl. Genet. 2015, 128(1):15-23
				SCN 44-3	1696616	3474294		Jiao et al. 2015A	Jiao, Y., Vuong, T., Liu, Y., Meinhardt, C., Liu, Y., Joshi, T., Cregan, P., Xu, D., Shannon, J., Nguyen, H. Identification and evaluation of quantitative trait loci underlying resistance to multiple HG types of soybean cyst nematode. Theor. Appl. Genet. 2015, 128(1):15-23
				SCN 48-2	949928	3172879		Silva et al. 2007a	Silva, M., Schuster, I., Silva, J., Ferreira, A., Barros, E., Moreira, M. Validation of microsatellite markers for assisted selection of soybean resistance to cyst nematode races 3 and 14. Pesq. agropec. bras. 2007, 42(8):1143-1150
				SCN 15-1	1736692	6122502		Vaghchhipawala et al. 2001	Vaghchhipawala, Z., Bassuner, R., Clayton, K., Lewers, K.S., Shoemaker, R.C., Mackenzie, S. Modulations in gene expression and mapping of genes associated with cyst nematode infection of soybean. Mol. Plant Microbe Interac. 2001, 14(1):42-54.
Sucrose synthase 1, SS	Glyma.09G073600	7809852	7816248	SCN 39-5	9214778	35521285	1.3	Wu et al. 2009	Wu, X., Blake, S., Sleper, D., Shannon, J., Cregan, P., Nguyen, H. QTL, additive and epistatic effects for SCN resistance in PI 437654. Theor. Appl. Genet. 2009, 118(6):1093-1105.
	Glyma.13G114000	22767704	22773231	SCN 51-4	17875691	23683604		Valdes-Lopez et al. 2011a	Valdes-Lopez, O., Thibivilliers, S., Qiu, J., Xu, W., Nguyen, T., Libault, M., Le, B., Goldberg, R., Hill, C., Hartman, G., Diers, B., Stacey, G. Identification of Quantitative Trait Loci Controlling Gene Expression during the Innate Immunity Response of Soybean. Plant Physiology (2011) 157:1975-1986.
	Glyma.15G182600	17910131	17916426	cqSCN-006	7043661	39682051		Kabelka et al. 2005	Carlson, S.R., Diers, B.W., Kabelka, E.A. Localization of Two Loci that Confer Resistance to Soybean Cyst Nematode from Glycine soja PI 468916 Crop Sci. 2005, 45(6):2473-2481. Crop Sci. 2005, 45(6):2473-2481.
				SCN 18-4	14779070	34757105		Yue et al. 2001	Yue, P., Arelli, P. & Sleper, D. Molecular characterization of resistance to Heterodera glycines in soybean PI 438489B. Theor Appl Genet 102, 921–928 (2001). https://doi.org/10.1007/s001220000453
				SCN 21-3	14779070	34757105		Yue et al. 2001	Yue, P., Arelli, P. & Sleper, D. Molecular characterization of resistance to Heterodera glycines in soybean PI 438489B. Theor Appl Genet 102, 921–928 (2001). https://doi.org/10.1007/s001220000453
				SCN 25-1	17019921	51294894		Yue et al. 2001	Yue, P., Sleper, D.A., Arelli, P.R. Mapping Resistance to Multiple Races of Heterodera glycines in Soybean PI 89772. Crop Sci. 2001, 41(5):1589-1595.
				SCN 38-1	14779070	22969031		Chang et al. 2011	Chang, W., Dong, L., Wang, Z., Hu, H., Han, Y., Teng, W., Zhang, H., Guo, M., Li, W. QTL underlying resistance to two HG types of Heterodera glycines found in soybean cultivar 'L-10'. BMC Genom. 2011, 12:233.
				SCN 45-6	14779070	17702456		Guo et al. 2005a	Guo, B., Sleper, D., Arelli, P., Shannon, J., Nguyen, H. Identification of QTLs associated with resistance to soybean cyst nematode races 2, 3 and 5 in soybean PI 90763. Theor Appl Genet. 2005, 111(5):965-71
	Glyma.17G045800	3404918	3410491	SCN 23-2	2833622	6477809		Yue et al. 2001	Yue, P., Sleper, D.A., Arelli, P.R. Mapping Resistance to Multiple Races of Heterodera glycines in Soybean PI 89772. Crop Sci. 2001, 41(5):1589-1595.
6-phosphogluconate dehydrogenase, 6PGDH	Glyma.19G038400	5386122	5388865	NA
	Glyma.08G254500	22503069	22506240	SCN 37-4	17232172	39682528		Vuong et al. 2010	Vuong, T., Sleper, D., Shannon, J., Nguyen, H. Novel quantitative trait loci for broad-based resistance to soybean cyst nematode (Heterodera glycines Ichinohe) in soybean PI 567516C. Theor. Appl. Genet. 2010, 121(7):1253-1266.
				SCN 46-8	20812884	40671320		Abdelmajid et al. 2014a	Abdelmajid, K., Ramos, L., Hyten, D., Bond, J., Bendahmane, A., Arelli, P., Njiti, V., Cianzio, S., Kantartzi, S., Meksem, K. Quantitative Trait Loci (QTL) that Underlie SCN Resistance in Soybean [Glycine max (L.) Merr.] PI438489B by ‘Hamilton’ Recombinant Inbred Line (RIL) Population. Atlas Journal of Plant Biology. 2014, 1(3):29-38
				SCN 50-2	16773792	23132231		Swaminathan et al. 2018b	Swaminathan, S., Abeysekara, N., Knight, J., Liu, M., Dong, J., Hudson, M., Bhattacharyya, M., Cianzio, S. Mapping of new quantitative trait loci for sudden death syndrome and soybean cyst nematode resistance in two soybean populations. Theor Appl Genet 2018, 131:1047-1062
Fructose-bisphosphate aldolase, FBA	Glyma.14G189400	45416092	45419126	SCN 10-1	45993714	46281808		Qiu et al. 1999	Qiu, B.X., Arelli, P.R., Sleper, D.A. RFLP markers associated with soybean cyst nematode resistance and seed composition in a 'Peking' x 'Essex' population. Theor. Appl. Genet. 1999, 98(3-4):356-364
Glyceraldehyde 3-P Dehydrogenase, GAPDH	Glyma.04G193400	46504406	4160517	SCN 36-6	3300829	5286777		Vuong et al. 2011	Vuong, T., Sleper, D., Shannon, J., Wu, X., Nguyen, H. Confirmation of quantitative trait loci for resistance to multiple-HG types of soybean cyst nematode (Heterodera glycines Ichinohe). Euph. 2011, 181(1):101-113.
				SCN 44-5	5241170	7481984		Jiao et al. 2015A	Jiao, Y., Vuong, T., Liu, Y., Meinhardt, C., Liu, Y., Joshi, T., Cregan, P., Xu, D., Shannon, J., Nguyen, H. Identification and evaluation of quantitative trait loci underlying resistance to multiple HG types of soybean cyst nematode. Theor. Appl. Genet. 2015, 128(1):15-23
	Glyma.04G193500	46511258	46514211	SCN 51-3	46184435	47875842		Valdes-Lopez et al. 2011a	Valdes-Lopez, O., Thibivilliers, S., Qiu, J., Xu, W., Nguyen, T., Libault, M., Le, B., Goldberg, R., Hill, C., Hartman, G., Diers, B., Stacey, G. Identification of Quantitative Trait Loci Controlling Gene Expression during the Innate Immunity Response of Soybean. Plant Physiology (2011) 157:1975-1986
	Glyma.06G172600	14466166	14475919	SCN 9-6	14467413	15524734		Mahalingam 1995	Mahalingam, R., Skorupska, H.T. DNA markers for resistance to Heterodera glycines I. race 3 in soybean cultivar Peking. Breeding Sci., 45(4):435-443.
Enolase 1, ENO1	Glyma.04G144300	26323877	26328770	SCN 51-2	16984057	44032266		Valdes-Lopez et al. 2011a	Valdes-Lopez, O., Thibivilliers, S., Qiu, J., Xu, W., Nguyen, T., Libault, M., Le, B., Goldberg, R., Hill, C., Hartman, G., Diers, B., Stacey, G. Identification of Quantitative Trait Loci Controlling Gene Expression during the Innate Immunity Response of Soybean. Plant Physiology (2011) 157:1975-1986
	Glyma.19G190900	44841863	44846599	SCN 29-7	45182458	47378001	0.3	Guo et al. 2006	Guo, B., Sleper, D.A., Arelli, P.R., Shannon, J.G., Nguyen, H.T. Identification of QTLs associated with resistance to soybean cyst nematode races 2, 3 and 5 in soybean PI 90763. Theor. Appl. Genet. 2005, 103(8):1167-1173
				SCN 45-5	45182458	47167396	0.3	Guo et al. 2005a	Guo, B., Sleper, D., Arelli, P., Shannon, J., Nguyen, H. Identification of QTLs associated with resistance to soybean cyst nematode races 2, 3 and 5 in soybean PI 90763. Theor Appl Genet. 2005, 111(5):965-71
	Glyma.03G190500	40120464	40124965	SCN 44-15	7805399	44176490		Jiao et al. 2015A	Jiao, Y., Vuong, T., Liu, Y., Meinhardt, C., Liu, Y., Joshi, T., Cregan, P., Xu, D., Shannon, J., Nguyen, H. Identification and evaluation of quantitative trait loci underlying resistance to multiple HG types of soybean cyst nematode. Theor. Appl. Genet. 2015, 128(1):15-23.
3. Glyoxylate cycle
NADPH-specific isocitrate dehydrogenase, NADP-IDHs	Glyma.02G241200	42962596	42968168	NA
	Glyma.14G211000	47592207	47597473	SCN 10-1	45993714	46281808	1.3	Qiu et al. 1999	Qiu, B.X., Arelli, P.R., Sleper, D.A. RFLP markers associated with soybean cyst nematode resistance and seed composition in a 'Peking' x 'Essex' population. Theor. Appl. Genet. 1999, 98(3-4):356-364
				SCN 10-3	48345612	48542406	0.7	Qiu et al. 1999	Qiu, B.X., Arelli, P.R., Sleper, D.A. RFLP markers associated with soybean cyst nematode resistance and seed composition in a 'Peking' x 'Essex' population. Theor. Appl. Genet. 1999, 98(3-4):356-364
				SCN 11-3	48345612	48542406	0.7	Qiu et al. 1999	Qiu, B.X., Arelli, P.R., Sleper, D.A. RFLP markers associated with soybean cyst nematode resistance and seed composition in a 'Peking' x 'Essex' population. Theor. Appl. Genet. 1999, 98(3-4):356-364
Malate dehydrogenase, MDH	Glyma.02G005500	597924	601924	NA
	Glyma.12G159300	27787400	27791365	NA
	Glyma.06G231500	36232185	36236678	NA
	Glyma.13G104800	21944728	21949010	SCN 51-4	17875691	23683604		Valdes-Lopez et al. 2011a	Valdes-Lopez, O., Thibivilliers, S., Qiu, J., Xu, W., Nguyen, T., Libault, M., Le, B., Goldberg, R., Hill, C., Hartman, G., Diers, B., Stacey, G. Identification of Quantitative Trait Loci Controlling Gene Expression during the Innate Immunity Response of Soybean. Plant Physiology (2011) 157:1975-1986
	Glyma.10G006500	633423	637181	NA
NADP-Malic Enzyme 1, NADP-ME 1	Glyma.05G227400	40556860	40562544	NA
	Glyma.13G354900	44343888	44349533	NA
	Glyma.15G019300	1488374	1494183	NA
	Glyma.08G034300	2721922	2726880	SCN 33-2	3993698	8223512		Guo et al. 2006	Guo, B., Sleper, D., Nguyen, H., Arelli, P., Shannon, J. Quantitative Trait Loci Underlying Resistance to Three Soybean Cyst Nematode Populations in Soybean PI 404198A. Crop Sci. 2006, 46(1):224-233.
				SCN 46-5	2559051	3537934		Abdelmajid et al. 2014a	Abdelmajid, K., Ramos, L., Hyten, D., Bond, J., Bendahmane, A., Arelli, P., Njiti, V., Cianzio, S., Kantartzi, S., Meksem, K. Quantitative Trait Loci (QTL) that Underlie SCN Resistance in Soybean [Glycine max (L.) Merr.] PI438489B by ‘Hamilton’ Recombinant Inbred Line (RIL) Population. Atlas Journal of Plant Biology. 2014, 1(3):29-38
	Glyma.01G008500	827132	832098	SCN 26-2	6926577	26610094		Yue et al. 2001	Yue, P., Sleper, D.A., Arelli, P.R. Mapping Resistance to Multiple Races of Heterodera glycines in Soybean PI 89772. Crop Sci. 2001, 41(5):1589-1595.
Glycine dehydrogenase/decarboxylase, GlyDH/GLDC	Glyma.14G094700	8801566	8808263	SCN 17-2	7922227	13086766		Yue et al. 2001	Yue, P., Arelli, P. & Sleper, D. Molecular characterization of resistance to Heterodera glycines in soybean PI 438489B. Theor Appl Genet 102, 921–928 (2001). https://doi.org/10.1007/s001220000453
				SCN 19-2	7922227	13086766		Yue et al. 2001	Yue, P., Arelli, P. & Sleper, D. Molecular characterization of resistance to Heterodera glycines in soybean PI 438489B. Theor Appl Genet 102, 921–928 (2001). https://doi.org/10.1007/s001220000453
	Glyma.04G051200	4154435	4160517	SCN 36-6	3300829	5286777		Vuong et al. 2011	Vuong, T., Sleper, D., Shannon, J., Wu, X., Nguyen, H. Confirmation of quantitative trait loci for resistance to multiple-HG types of soybean cyst nematode (Heterodera glycines Ichinohe). Euph. 2011, 181(1):101-113.
				SCN 44-5	5241170	7481984		Jiao et al. 2015A	Jiao, Y., Vuong, T., Liu, Y., Meinhardt, C., Liu, Y., Joshi, T., Cregan, P., Xu, D., Shannon, J., Nguyen, H. Identification and evaluation of quantitative trait loci underlying resistance to multiple HG types of soybean cyst nematode. Theor. Appl. Genet. 2015, 128(1):15-23.
	Glyma.06G052100	3920327	3926372	SCN 22-1	347697	656097	3.2	Wang et al. 2001	Wang, D., Diers, B.W., Arelli, P.R., Shoemaker, R.C. Loci underlying resistance to Race 3 of soybean cyst nematode in Glycine soja plant introduction 468916. Theor. Appl. Genet. 2001, 103(4):561-566.
	Glyma.17G228800	38383184	38389776	cqSCN-005	20107917	27359151	11.02	Kazi et al. 2010	Kazi, S., Shultz, J., Afzal, J., Hashmi, R., Jasim, M., Bond, J., Arelli, P., Lightfoot, D. Iso-lines and inbred-lines confirmed loci that underlie resistance from cultivar 'Hartwig' to three soybean cyst nematode populations. Theor. Appl. Genet.
				SCN 16-1	18425834	27359151	11.02	Schuster et al. 2001	Schuster, I., Abdelnoor, R.V., Marin, S.R.R., Carvalho, V.P., Kiihl, R.A.S., Silva, J.F.V., Sediyama, C.S., Barros, E.G., Moreira, M.A. Identification of a new major QTL associated with resistance to soybean cyst nematode (Heterodera glycines). Theor. Appl. Genet. 2001, 102(1):91-96.
4. Succinyl-CoA and heme related
Dihydrolipoyllysine-residue succinyltransferase, DLST	Glyma.02G292500	47153091	47160573	NA
	Glyma.14G022100	1555679	1561305	NA
Malonate-semialdehyde dehydrogenase, MMSDH	Glyma.08G066600	5104811	5113095	SCN 33-2	3993698	8223512		Guo et al. 2006	Guo, B., Sleper, D., Nguyen, H., Arelli, P., Shannon, J. Quantitative Trait Loci Underlying Resistance to Three Soybean Cyst Nematode Populations in Soybean PI 404198A. Crop Sci. 2006, 46(1):224-233.
	Glyma.07G183600	35126140	35132751	SCN 40-4	37079608	40919537	1.9	Ferreira et al. 2011	Ferreira, M., Cervigni, G., Ferreira, A., Schuster, I., Santana, F., Pereira, W., Barros, E., Moreira, M. QTL for resistance to soybean cyst nematode races 3, 9, and 14 in cultivar Hartwig. Pesq. Agro. Bras. 2011, 46(4):420-428.
Glycine hydroxymethyltransferase, GlyA, SHMT	Glyma.13G222300	33522900	33527302	NA
	Glyma.16G044900	4259754	4262894	SCN 46-8	133118	2762849	4.1	Abdelmajid et al. 2014a	Abdelmajid, K., Ramos, L., Hyten, D., Bond, J., Bendahmane, A., Arelli, P., Njiti, V., Cianzio, S., Kantartzi, S., Meksem, K. Quantitative Trait Loci (QTL) that Underlie SCN Resistance in Soybean [Glycine max (L.) Merr.] PI438489B by ‘Hamilton’ Recombinant Inbred Line (RIL) Population. Atlas Journal of Plant Biology. 2014, 1(3):29-38
	Glyma.15G089900	6920290	6922354	SCN 22-3	5240509	7043661		Wang et al. 2001	Wang, D., Diers, B.W., Arelli, P.R., Shoemaker, R.C. Loci underlying resistance to Race 3 of soybean cyst nematode in Glycine soja plant introduction 468916. Theor. Appl. Genet. 2001, 103(4):561-566.
Serine Hydroxymethyltransferase, SHMT	Glyma.08G274400	36279886	36286158	SCN 37-4	17232172	39682528		Vuong et al. 2010	Vuong, T., Sleper, D., Shannon, J., Nguyen, H. Novel quantitative trait loci for broad-based resistance to soybean cyst nematode (Heterodera glycines Ichinohe) in soybean PI 567516C. Theor. Appl. Genet. 2010, 121(7):1253-1266.
				SCN 46-8	20812884	40671320		Abdelmajid et al. 2014a	Abdelmajid, K., Ramos, L., Hyten, D., Bond, J., Bendahmane, A., Arelli, P., Njiti, V., Cianzio, S., Kantartzi, S., Meksem, K. Quantitative Trait Loci (QTL) that Underlie SCN Resistance in Soybean [Glycine max (L.) Merr.] PI438489B by ‘Hamilton’ Recombinant Inbred Line (RIL) Population. Atlas Journal of Plant Biology. 2014, 1(3):29-38
				SCN 50-3	23584127	47136104		Swaminathan et al. 2018b	Swaminathan, S., Abeysekara, N., Knight, J., Liu, M., Dong, J., Hudson, M., Bhattacharyya, M., Cianzio, S. Mapping of new quantitative trait loci for sudden death syndrome and soybean cyst nematode resistance in two soybean populations. Theor Appl Genet 2018, 131:1047-1062.
	Glyma.09G202000	42616719	42623320	SCN 34-3	42407962	46515608		Winter et al. 2007	Winter, S., Shelp, B., Anderson, T., Welacky, T., Rajcan, I. QTL associated with horizontal resistance to soybean cyst nematode in Glycine soja PI464925B. Theor. Appl. Genet. 2007, 114(3):461-472.
	Glyma.18G150000	27237675	27243626	SCN 17-4	4713017	41530961		Yue et al. 2001	Yue, P., Arelli, P., Sleper, D.A. Molecular characterization of resistance to Heterodera glycines in soybean PI 438489B. Theor. Appl. Genet. 2001, 102( 6-7):921-928.
				SCN 18-5	4713017	41530961		Yue et al. 2001	Yue, P., Arelli, P., Sleper, D.A. Molecular characterization of resistance to Heterodera glycines in soybean PI 438489B. Theor. Appl. Genet. 2001, 102( 6-7):921-928.
				SCN 19-4	4713017	49174114		Yue et al. 2001	Yue, P., Arelli, P., Sleper, D.A. Molecular characterization of resistance to Heterodera glycines in soybean PI 438489B. Theor. Appl. Genet. 2001, 102( 6-7):921-928.
	Glyma.14G184500	44788273	44795824	SCN 10-1	45993714	46281808	1.19	Qiu et al. 1999	Qiu, B.X., Arelli, P.R., Sleper, D.A. RFLP markers associated with soybean cyst nematode resistance and seed composition in a 'Peking' x 'Essex' population. Theor. Appl. Genet. 1999, 98(3-4):356-364.
	Glyma.02G217100	40402376	40409818	NA
	Glyma.08G108900	8358422	8363343	SCN 8-5	8283676	9158742		Chang et al. 1997	Chang, S.J.C., Doubler, T.W., Kilo, V.Y., Abu-Thredeih, J., Prabhu, R., Freire, V., Suttner, R., Klein, J., Schmidt, M.E., Gibson, P.T., Lightfoot, D.A. Association of loci underlying field-resistance to soybean sudden-death syndrome (SDS) and cyst-nematode (SCN) RACE-3. Crop Sci. 1997, 37(3):966-971.
				SCN 9-2	6809647	8513390		Mahalingam 1995	Mahalingam, R., Skorupska, H.T. DNA markers for resistance to Heterodera glycines I. race 3 in soybean cultivar Peking. Breeding Sci., 45(4):435-443.
				SCN 13-2	8283676	9158742		Prabhu et al. 1999	Prabhu, R.R., Njiti, V.N., Bell-Johnson, B., Johnson, J.E., Schmidt, M.E., Klein, J.H., Lightfoot, D.A. Selecting soybean cultivars for dual resistance to soybean cyst nematode and sudden death syndrome using two DNA markers. Crop Sci. 1999, 39(4):982-987.
				SCN 19-1	6756953	9204446		Yue et al. 2001	Yue, P., Arelli, P., Sleper, D.A. Molecular characterization of resistance to Heterodera glycines in soybean PI 438489B. Theor. Appl. Genet. 2001, 102( 6-7):921-928.
				SCN 27-2	6809647	8513390		Meksem et al. 2001C	Meksem, K., Pantazopoulos, P., Njiti, V.N., Hyten, L.D., Arelli, P.R., Lightfoot, D.A. Forrest resistance to the soybean cyst nematode is bigenic: saturation mapping of the Rhg1 and Rhg4 loci. Theor. Appl. Genet. 2001, 103(5):710-717.
				SCN 29-5	7892162	10633645		Guo et al. 2006	Guo, B., Sleper, D.A., Arelli, P.R., Shannon, J.G., Nguyen, H.T. Identification of QTLs associated with resistance to soybean cyst nematode races 2, 3 and 5 in soybean PI 90763. Theor. Appl. Genet. 2005, 103(8):1167-1173.
				SCN 39-1	8283676	9158742		Wu et al. 2009	Wu, X., Blake, S., Sleper, D., Shannon, J., Cregan, P., Nguyen, H. QTL, additive and epistatic effects for SCN resistance in PI 437654. Theor. Appl. Genet. 2009, 118(6):1093-1105.
				SCN 39-8	8283676	10761253		Wu et al. 2009	Wu, X., Blake, S., Sleper, D., Shannon, J., Cregan, P., Nguyen, H. QTL, additive and epistatic effects for SCN resistance in PI 437654. Theor. Appl. Genet. 2009, 118(6):1093-1105.
				SCN 41-4	8283676	9192408		Kazi et al. 2010	Kazi, S., Shultz, J., Afzal, J., Hashmi, R., Jasim, M., Bond, J., Arelli, P., Lightfoot, D. Iso-lines and inbred-lines confirmed loci that underlie resistance from cultivar 'Hartwig' to three soybean cyst nematode populations. Theor. Appl. Genet.
				SCN 41-5	8283676	9192408		Kazi et al. 2010	Kazi, S., Shultz, J., Afzal, J., Hashmi, R., Jasim, M., Bond, J., Arelli, P., Lightfoot, D. Iso-lines and inbred-lines confirmed loci that underlie resistance from cultivar 'Hartwig' to three soybean cyst nematode populations. Theor. Appl. Genet.
				SCN 42-1	7892162	12389879		Ariagada et al. 2012	Arriagada, O., Mora, F., Dellarosa, J., Ferreira, M., Cervigni, G., Schuster, I. Bayesian mapping of quantitative trait loci (QTL) controlling soybean cyst nematode resistant. Euph. 2012, 186(3):907-917.
				SCN 45-4	7892162	10633645		Guo et al. 2005a	Guo, B., Sleper, D., Arelli, P., Shannon, J., Nguyen, H. Identification of QTLs associated with resistance to soybean cyst nematode races 2, 3 and 5 in soybean PI 90763. Theor Appl Genet. 2005, 111(5):965-71
				SCN 48-1	8283676	9192408		Silva et al. 2007a	Silva, M., Schuster, I., Silva, J., Ferreira, A., Barros, E., Moreira, M. Validation of microsatellite markers for assisted selection of soybean resistance to cyst nematode races 3 and 14. Pesq. agropec. bras. 2007, 42(8):1143-1150.
5. Cytoskeleton -related
Actin	Glyma.08G182200	14613725	14616889	SCN 42-1	7892162	12389879		Ariagada et al. 2012	Arriagada, O., Mora, F., Dellarosa, J., Ferreira, M., Cervigni, G., Schuster, I. Bayesian mapping of quantitative trait loci (QTL) controlling soybean cyst nematode resistant. Euph. 2012, 186(3):907-917.
				SCN 9-1	10865328	13126779		Mahalingam 1995	Mahalingam, R., Skorupska, H.T. DNA markers for resistance to Heterodera glycines I. race 3 in soybean cultivar Peking. Breeding Sci., 45(4):435-443.
	Glyma.15G050200	3963341	3966353	NA
Actin-7	Glyma.06G150100	12256574	12259590	SCN 9-6	14467413	15524734	2.2	Mahalingam 1995	Mahalingam, R., Skorupska, H.T. DNA markers for resistance to Heterodera glycines I. race 3 in soybean cultivar Peking. Breeding Sci., 45(4):435-443.
	Glyma.12G063400	4648141	4651679	SCN 39-4	5415879	7980959	0.7	Wu et al. 2009	Wu, X., Blake, S., Sleper, D., Shannon, J., Cregan, P., Nguyen, H. QTL, additive and epistatic effects for SCN resistance in PI 437654. Theor. Appl. Genet. 2009, 118(6):1093-1105.
Tubulin A isoform X1	Glyma.14G219300	48429763	48432990	SCN 10-3	48345612	48542406		Qiu et al. 1999	Qiu, B.X., Arelli, P.R., Sleper, D.A. RFLP markers associated with soybean cyst nematode resistance and seed composition in a 'Peking' x 'Essex' population. Theor. Appl. Genet. 1999, 98(3-4):356-364.
				SCN 11-3	48345612	48542406		Qiu et al. 1999	Qiu, B.X., Arelli, P.R., Sleper, D.A. RFLP markers associated with soybean cyst nematode resistance and seed composition in a 'Peking' x 'Essex' population. Theor. Appl. Genet. 1999, 98(3-4):356-364.
Tubulin beta-4 chain-like	Glyma.03G124400	33743790	33746784	SCN 33-7	32670432	36368900		Guo et al. 2006	Guo, B., Sleper, D., Nguyen, H., Arelli, P., Shannon, J. Quantitative Trait Loci Underlying Resistance to Three Soybean Cyst Nematode Populations in Soybean PI 404198A. Crop Sci. 2006, 46(1):224-233.
				SCN 44-15	7805399	44176490		Jiao et al. 2015A	Jiao, Y., Vuong, T., Liu, Y., Meinhardt, C., Liu, Y., Joshi, T., Cregan, P., Xu, D., Shannon, J., Nguyen, H. Identification and evaluation of quantitative trait loci underlying resistance to multiple HG types of soybean cyst nematode. Theor. Appl. Genet. 2015, 128(1):15-23.
	Glyma.03G074400	18514546	18517121	SCN 4-3	5664735	16489463	2.02	Concibido et al. 1997	Concibido, V.C., Lange, D.A., Denny, R.L., Orf, J.H., Young, N.D. Genome mapping of soybean cyst nematode resistance genes in Peking, PI90763, and PI88788 using DNA markers. Crop Sci. 1997, 37(1):258-264.
	Glyma.04G023900	1919645	1923318	SCN 18-3	1601042	2777239		Yue et al. 2001	Yue, P., Arelli, P., Sleper, D.A. Molecular characterization of resistance to Heterodera glycines in soybean PI 438489B. Theor. Appl. Genet. 2001, 102( 6-7):921-928.
				SCN 21-1	1122989	2265858		Yue et al. 2001	Yue, P., Arelli, P., Sleper, D.A. Molecular characterization of resistance to Heterodera glycines in soybean PI 438489B. Theor. Appl. Genet. 2001, 102( 6-7):921-928.
				SCN 36-8	486057	3425900		Vuong et al. 2011	Vuong, T., Sleper, D., Shannon, J., Wu, X., Nguyen, H. Confirmation of quantitative trait loci for resistance to multiple-HG types of soybean cyst nematode (Heterodera glycines Ichinohe). Euph. 2011, 181(1):101-113.
	Glyma.01G109300	37232123	37235134	NA
	Glyma.19G127700	38632803	38635633	SCN 45-5	45182458	47167396	6.5	Guo et al. 2005a	Guo, B., Sleper, D., Arelli, P., Shannon, J., Nguyen, H. Identification of QTLs associated with resistance to soybean cyst nematode races 2, 3 and 5 in soybean PI 90763. Theor Appl Genet. 2005, 111(5):965-71
				SCN 29-7	45182458	47378001	6.5	Guo et al. 2006	Guo, B., Sleper, D.A., Arelli, P.R., Shannon, J.G., Nguyen, H.T. Identification of QTLs associated with resistance to soybean cyst nematode races 2, 3 and 5 in soybean PI 90763. Theor. Appl. Genet. 2005, 103(8):1167-1173.
	Glyma.17G258300	41238004	41241016	NA
	Glyma.06G024100	1806834	1810627	SCN 22-1	347697	656097	1.15	Wang et al. 2001	Wang, D., Diers, B.W., Arelli, P.R., Shoemaker, R.C. Loci underlying resistance to Race 3 of soybean cyst nematode in Glycine soja plant introduction 468916. Theor. Appl. Genet. 2001, 103(4):561-566.
	Glyma.20G159200	39756655	39759112	SCN 34-2	36575544	40623814		Winter et al. 2007	Winter, S., Shelp, B., Anderson, T., Welacky, T., Rajcan, I. QTL associated with horizontal resistance to soybean cyst nematode in Glycine soja PI464925B. Theor. Appl. Genet. 2007, 114(3):461-472.
	Glyma.10G235100	46452974	46455556	SCN 37-1	42295191	46492285		Vuong et al. 2010	Vuong, T., Sleper, D., Shannon, J., Nguyen, H. Novel quantitative trait loci for broad-based resistance to soybean cyst nematode (Heterodera glycines Ichinohe) in soybean PI 567516C. Theor. Appl. Genet. 2010, 121(7):1253-1266.
Cyclophilin	Glyma.11G098700	7504475	7505686	SCN 2-1	10836168	24571364	3.3	Verling et al. 1996	Vierling, R.A., Faghihi, J., Ferris, V.R., Ferris, J.M. Association of RFLP markers with loci conferring broad-based resistance to the soybean cyst nematode (Heterodera glycines). Theor. Appl. Genet. 1996, 92(1):83-86.
				SCN 23-1	10836168	25510220	3.3	Yue et al. 2001	Yue, P., Sleper, D.A., Arelli, P.R. Mapping Resistance to Multiple Races of Heterodera glycines in Soybean PI 89772. Crop Sci. 2001, 41(5):1589-1595.
				SCN 24-1	10836168	25510220	3.3	Yue et al. 2001	Yue, P., Sleper, D.A., Arelli, P.R. Mapping Resistance to Multiple Races of Heterodera glycines in Soybean PI 89772. Crop Sci. 2001, 41(5):1589-1595.
				SCN 26-1	10836168	24571364	3.3	Yue et al. 2001	Yue, P., Sleper, D.A., Arelli, P.R. Mapping Resistance to Multiple Races of Heterodera glycines in Soybean PI 89772. Crop Sci. 2001, 41(5):1589-1595.
				SCN 46-6	10206223	11310961	2.7	Abdelmajid et al. 2014a	Abdelmajid, K., Ramos, L., Hyten, D., Bond, J., Bendahmane, A., Arelli, P., Njiti, V., Cianzio, S., Kantartzi, S., Meksem, K. Quantitative Trait Loci (QTL) that Underlie SCN Resistance in Soybean [Glycine max (L.) Merr.] PI438489B by ‘Hamilton’ Recombinant Inbred Line (RIL) Population. Atlas Journal of Plant Biology. 2014, 1(3):29-38
6. ATP mitochondrial related genes
ADP,ATP carrier protein 1	Glyma.15G273600	51130117	51134021	SCN 25-1	17019921	51294894		Yue et al. 2001	Yue, P., Sleper, D.A., Arelli, P.R. Mapping Resistance to Multiple Races of Heterodera glycines in Soybean PI 89772. Crop Sci. 2001, 41(5):1589-1595.
	Glyma.08G154900	11953876	11957663	SCN 8-4	11616055	11786768		Chang et al. 1997	Chang, S.J.C., Doubler, T.W., Kilo, V.Y., Abu-Thredeih, J., Prabhu, R., Freire, V., Suttner, R., Klein, J., Schmidt, M.E., Gibson, P.T., Lightfoot, D.A. Association of loci underlying field-resistance to soybean sudden-death syndrome (SDS) and cyst-nematode (SCN) RACE-3. Crop Sci. 1997, 37(3):966-971.
				SCN 42-1	7892162	12389879		Ariagada et al. 2012	Arriagada, O., Mora, F., Dellarosa, J., Ferreira, M., Cervigni, G., Schuster, I. Bayesian mapping of quantitative trait loci (QTL) controlling soybean cyst nematode resistant. Euph. 2012, 186(3):907-917.
ADP-ribosylation factor 2-B-like	Glyma.09G030900	2545020	2547907	SCN 39-5	9214778	35521285	6.6	Wu et al. 2009	Wu, X., Blake, S., Sleper, D., Shannon, J., Cregan, P., Nguyen, H. QTL, additive and epistatic effects for SCN resistance in PI 437654. Theor. Appl. Genet. 2009, 118(6):1093-1105.
	Glyma.05G006000	526050	530851	SCN 46-4	21750	2671161		Abdelmajid et al. 2014a	Abdelmajid, K., Ramos, L., Hyten, D., Bond, J., Bendahmane, A., Arelli, P., Njiti, V., Cianzio, S., Kantartzi, S., Meksem, K. Quantitative Trait Loci (QTL) that Underlie SCN Resistance in Soybean [Glycine max (L.) Merr.] PI438489B by ‘Hamilton’ Recombinant Inbred Line (RIL) Population. Atlas Journal of Plant Biology. 2014, 1(3):29-38
ATP Synthase Subunit Beta-1	Glyma.05G092300	22254588	22256144	SCN 18-1	14845260	34385798		Yue et al. 2001	Yue, P., Arelli, P., Sleper, D.A. Molecular characterization of resistance to Heterodera glycines in soybean PI 438489B. Theor. Appl. Genet. 2001, 102( 6-7):921-928.
	Glyma.10G267200	49031152	49035297	SCN 37-1	42295191	46492285	2.5	Vuong et al. 2010	Vuong, T., Sleper, D., Shannon, J., Nguyen, H. Novel quantitative trait loci for broad-based resistance to soybean cyst nematode (Heterodera glycines Ichinohe) in soybean PI 567516C. Theor. Appl. Genet. 2010, 121(7):1253-1266.
ATP synthase subunit alpha	Glyma.05G092300	22254588	22256144	SCN 18-1	14845260	34385798		Yue et al. 2001	Yue, P., Arelli, P., Sleper, D.A. Molecular characterization of resistance to Heterodera glycines in soybean PI 438489B. Theor. Appl. Genet. 2001, 102( 6-7):921-928.
7. SNAP and PR related proteins
Soluble NSF Attachment Protein	Glyma.18G022500	1641008	1645711	cqSCN-001	1621602	1971473		Yuan et al. 2002	Yuan, J., Njiti, V.N., Meksem, K., Iqbal, M.J., Triwitayakorn, K., Kassem, M.A., Davis, G.T., Schmidt, M.E., Lightfoot, D.A. Quantitative trait loci in Two Soybean Recombinant Inbred Line Populations Segregating for Yield and Disease Resistance. Crop Sci. 2002, 42(1):271-277.
				SCN 29-1	949928	3275857		Guo et al. 2006	Guo, B., Sleper, D.A., Arelli, P.R., Shannon, J.G., Nguyen, H.T. Identification of QTLs associated with resistance to soybean cyst nematode races 2, 3 and 5 in soybean PI 90763. Theor. Appl. Genet. 2005, 103(8):1167-1173.
				SCN 29-4	949928	3275857		Guo et al. 2006	Guo, B., Sleper, D.A., Arelli, P.R., Shannon, J.G., Nguyen, H.T. Identification of QTLs associated with resistance to soybean cyst nematode races 2, 3 and 5 in soybean PI 90763. Theor. Appl. Genet. 2005, 103(8):1167-1173.
				SCN 29-8	949928	3275857		Guo et al. 2006	Guo, B., Sleper, D.A., Arelli, P.R., Shannon, J.G., Nguyen, H.T. Identification of QTLs associated with resistance to soybean cyst nematode races 2, 3 and 5 in soybean PI 90763. Theor. Appl. Genet. 2005, 103(8):1167-1173.
				SCN 32-1	1344090	2418920		Ferdous et al. 2006	Ferdous, S., Watanabe, S., Suzuki-Orihara, C., Tanaka, Y., Kamiya, M., Yamanaka, N., Harada, K. QTL Analysis of Resistance to Soybean Cyst Nematode Race 3 in Soybean Cultivar Toyomusume. Breed. Sci. 2006, 56(2):155-163.
				SCN 33-3	949928	1736692		Guo et al. 2006	Guo, B., Sleper, D., Nguyen, H., Arelli, P., Shannon, J. Quantitative Trait Loci Underlying Resistance to Three Soybean Cyst Nematode Populations in Soybean PI 404198A. Crop Sci. 2006, 46(1):224-233.
				SCN 33-5	949928	1736692		Guo et al. 2006	Guo, B., Sleper, D., Nguyen, H., Arelli, P., Shannon, J. Quantitative Trait Loci Underlying Resistance to Three Soybean Cyst Nematode Populations in Soybean PI 404198A. Crop Sci. 2006, 46(1):224-233.
				SCN 36-3	1239847	1736692		Vuong et al. 2011	Vuong, T., Sleper, D., Shannon, J., Wu, X., Nguyen, H. Confirmation of quantitative trait loci for resistance to multiple-HG types of soybean cyst nematode (Heterodera glycines Ichinohe). Euph. 2011, 181(1):101-113.
				SCN 36-4	1239847	1736692		Vuong et al. 2011	Vuong, T., Sleper, D., Shannon, J., Wu, X., Nguyen, H. Confirmation of quantitative trait loci for resistance to multiple-HG types of soybean cyst nematode (Heterodera glycines Ichinohe). Euph. 2011, 181(1):101-113.
				SCN 36-5	1239847	1736692		Vuong et al. 2011	Vuong, T., Sleper, D., Shannon, J., Wu, X., Nguyen, H. Confirmation of quantitative trait loci for resistance to multiple-HG types of soybean cyst nematode (Heterodera glycines Ichinohe). Euph. 2011, 181(1):101-113.
Pathogenesis-related protein Bet v I family	Glyma.15G218900	37466434	37467688	cqSCN-006	7043661	39682051		Kabelka et al. 2005	Carlson, S.R., Diers, B.W., Kabelka, E.A. Localization of Two Loci that Confer Resistance to Soybean Cyst Nematode from Glycine soja PI 468916 Crop Sci. 2005, 45(6):2473-2481. Crop Sci. 2005, 45(6):2473-2481.
				SCN 25-1	17019921	51294894		Yue et al. 2001	Yue, P., Sleper, D.A., Arelli, P.R. Mapping Resistance to Multiple Races of Heterodera glycines in Soybean PI 89772. Crop Sci. 2001, 41(5):1589-1595.
	Glyma.08G230500	18862871	18864462	SCN 37-4	17232172	39682528		Vuong et al. 2010	Vuong, T., Sleper, D., Shannon, J., Nguyen, H. Novel quantitative trait loci for broad-based resistance to soybean cyst nematode (Heterodera glycines Ichinohe) in soybean PI 567516C. Theor. Appl. Genet. 2010, 121(7):1253-1266.
				SCN 50-2	16773792	23132231		Swaminathan et al. 2018b	Swaminathan, S., Abeysekara, N., Knight, J., Liu, M., Dong, J., Hudson, M., Bhattacharyya, M., Cianzio, S. Mapping of new quantitative trait loci for sudden death syndrome and soybean cyst nematode resistance in two soybean populations. Theor Appl Genet 2018, 131:1047-1062.
