# Supplementary material for: Proteomic, Transcriptomic, Mutational, and Functional Assays Reveal the Involvement of Both THF and PLP Sites at the GmSHMT08 in Resistance to Soybean Cyst Nematode
Source: Int J Mol Sci. 2022 Sep 24;23(19):11278. doi: 10.3390/ijms231911278 (PMC9570156; doi:10.3390/ijms231911278)
Supplement: Supplementary file 1 [file ijms-23-11278-s001.zip › Supplemental Figures S1-S11.pdf]

# **Proteomic, Transcriptomic, Mutational, and Functional Assays Reveal the Involvement of Both THF and PLP Sites at the GmSHMT08 in Resistance to Soybean Cyst Nematode**

Naoufal Lakhssassi <sup>1</sup>, Dounya Knizia <sup>1</sup>, Abdelhalim El Baze <sup>1</sup>, Aicha Lakhssassi <sup>2</sup>, Jonas Meksem <sup>3</sup>  
and Khalid Meksem <sup>1,\*</sup>

<sup>1</sup> Department of Plant, Soil and Agricultural Systems, Southern Illinois University,  
Carbondale, IL 62901, USA

<sup>2</sup> Faculté des Sciences et Techniques, Université Abdelmalek Essaâdi, Tanger 90000, Morocco

<sup>3</sup> Trinity College of Arts and Sciences, Duke University, Durham, NC 27708, USA; jonas.meksem@duke.edu

\* Correspondence: meksem@siu.edu

**Supplemental material**

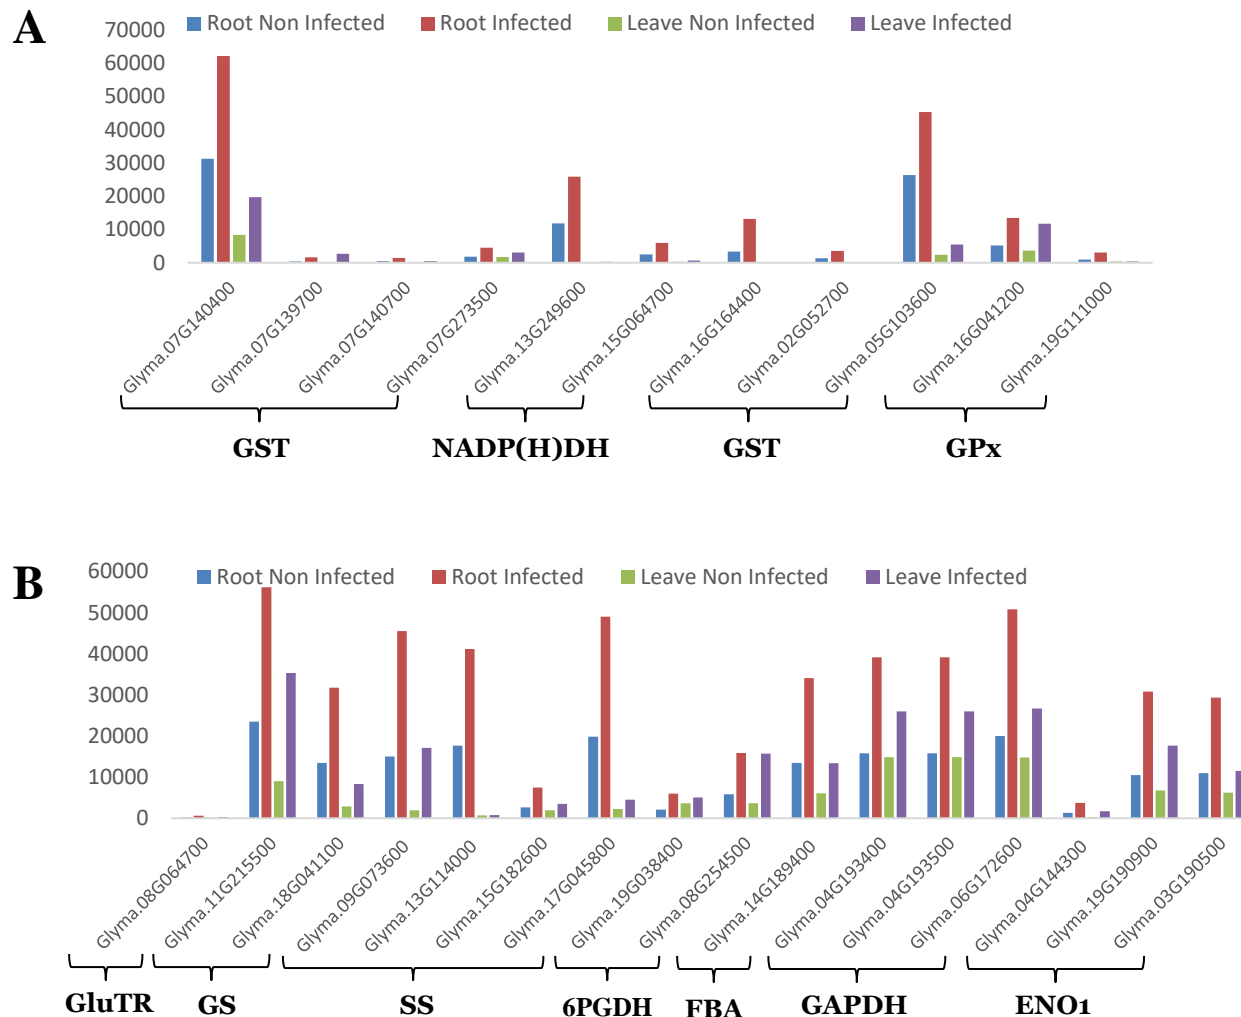

**Supplemental Figure S1.** Expression analysis of SCN infected (3DAI) and non-infected soybean roots and leaves based on RNAseq data analysis of all the identified genes from mass spectrometry shown in Table S2, corresponding to key components related to redox hemeostasis (A), Glycolysis (B), Glyoxylate cycle (C), Succinyl-CoA and heme biosynthesis related enzymes (D), Cytoskeleton-related genes (E), and ATP mitochondrial related genes (F).

**C**

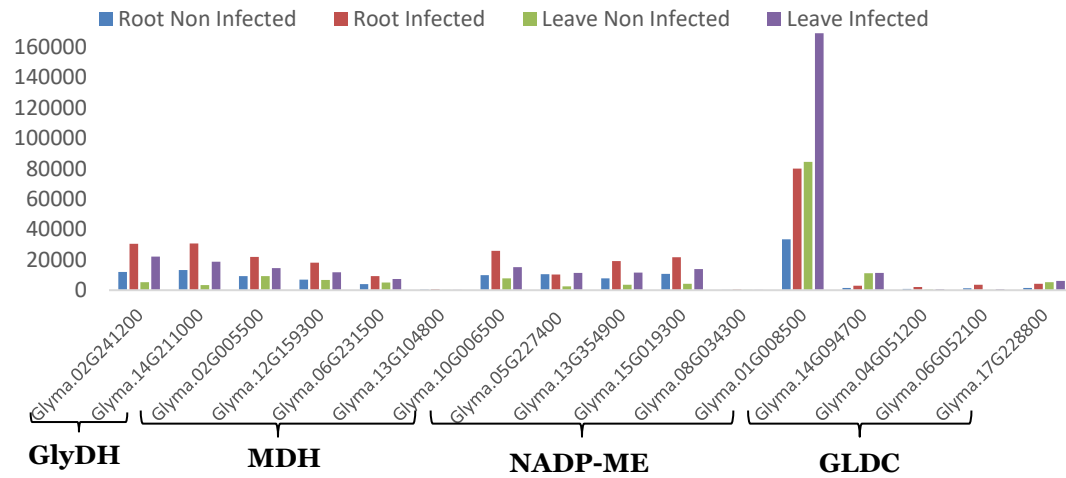

**D**

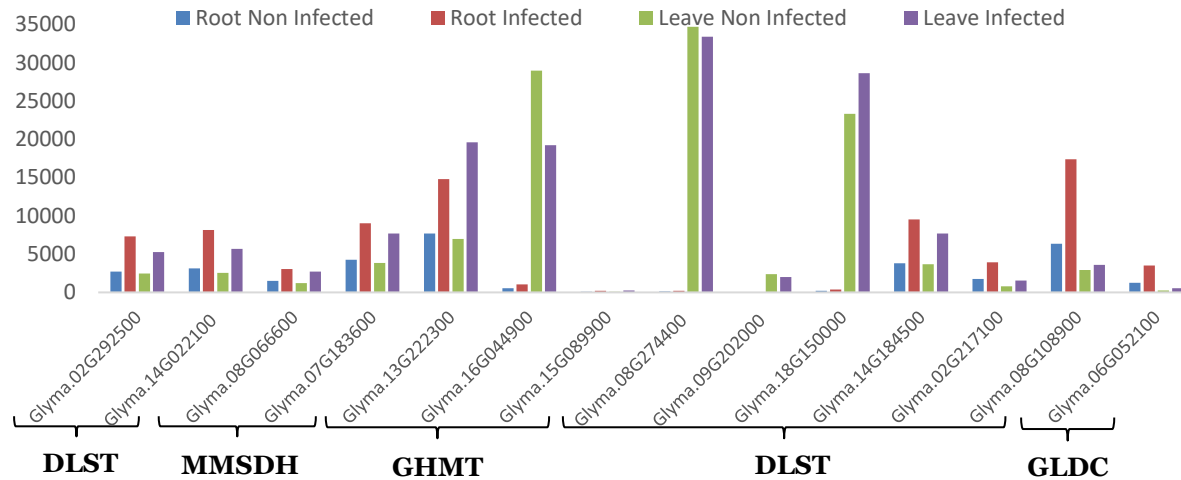

**Supplemental Figure S1.** Expression analysis of SCN infected (3DAI) and non-infected soybean roots and leaves based on RNAseq data analysis of all the identified genes from mass spectrometry shown in Table S2, corresponding to key components related to redox hemeostasis (A), Glycolysis (B), Glyoxylate cycle (C), Succinyl-CoA and heme biosynthesis related enzymes (D), Cytoskeleton-related genes (E), and ATP mitochondrial related genes (F).

**E**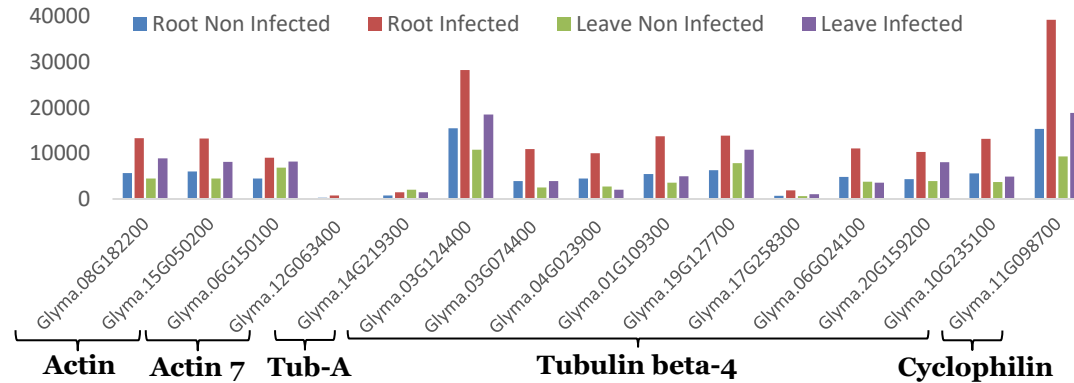**F**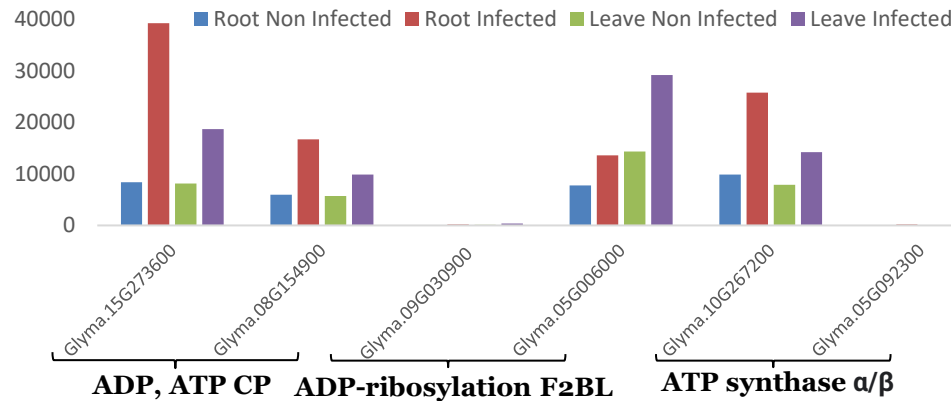

**Supplemental Figure S1.** Expression analysis of SCN infected (3DAI) and non-infected soybean roots and leaves based on RNAseq data analysis of all the identified genes from mass spectrometry shown in Table S2, corresponding to key components related to redox hemeostasis (A), Glycolysis (B), Glyoxylate cycle (C), Succinyl-CoA and heme biosynthesis related enzymes (D), Cytoskeleton-related genes (E), and ATP mitochondrial related genes (F).

Gene Name F-SHMT08c-CDS

Cloning Vector pG2RNAi2

Length (bp) 1430

Cloning Sites *Ascl*-*AvrII*

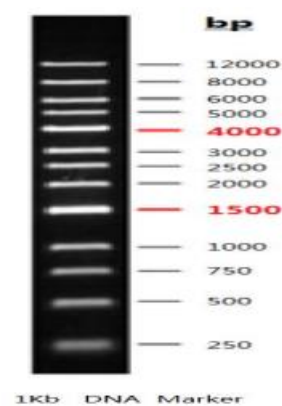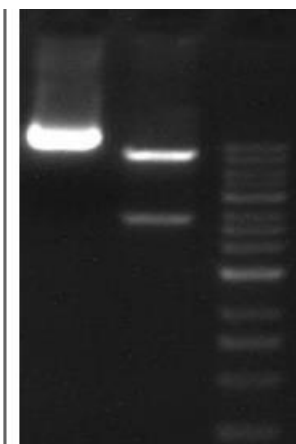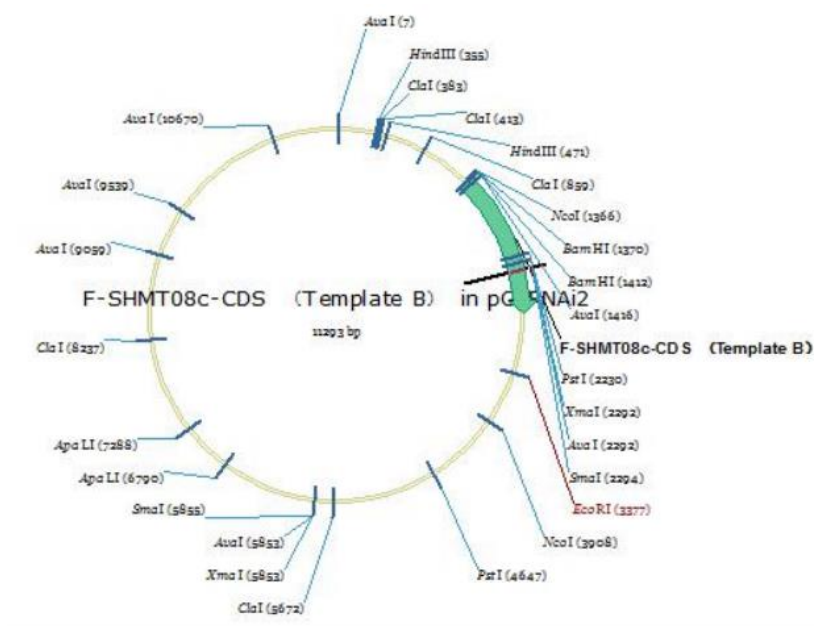

**Supplemental Figure S2.** F-SHMT08c-CDS, insert size, vector, restriction enzymes, and sequenced positive clones used for cloning.

## Detailed Sequence of the Whole Construct:

```

1  TTGATCCCGA GGGGAACCCT GTGGTTGGCA TGCACATACA AATGGACGAA CGGATAAACC
61  TTTTCACGCC CTTTAAATA TCCGTTATTC TAATAAACGC TCTTTTCTCT TAGGTTTACC
121 CGCCAATATA TCCTGTCAAA CACTGATAGT TTAAACTGAA GGCGGGAAAC GACAATCTGA
181 TCCAAGCTCA AGCTCATTCG CCATTCAGGC TGCGCAACTG TTGGGAAGGG CGATCGGTGC
241 GGGCCTCTTC GCTATTACGC CAGCTGGCGA AAGGGGGATG TGCTGCAAGG CGATTAAGTT
301 GGGTAACGCC AGGGTTTTC CAGTCACGAC GTTGTAAAC GACGGCCAGT GCCAAGCTTA
361 TTACCCTGTT ATCCCTAGAT ATCGATTTTG GCTACCTTAA GGTAGCCAAA ATCGATCACT
421 AGTGCGGGCCG CGGGCCCAAT ATAACAACGA CGTCGTAACA GATAAAGCGA AGCTTGAAGG
481 TGCATGTGAC TCCGTCAAGA TTACGAAACC GCCAACTACC ACGCAAATTG CAATTCTCAA
541 TTTCTTAGAA GGACTCTCCG AAAATGCATC CAATACCAA TATTACCGGT GTCATAGGCA
601 CCAAGTGACA CCATACATGA ACACGCGTCA CAATATGACT GGAGAAGGGT TCCACACCTT
661 ATGCTATAAA ACGCCCCACA CCCCTCCTCC TTCCTTCGCA GTTCAATTCC AATATATTCC
721 ATTCTCTCTG TGTATTTCCC TACCTCTCCC TTCAAGGTTA GTCGATTTCT TCTGTTTTTC
781 TTCTTCGTTT TTTCCATGAA TTGTGTATGT TCTTTGATCA ATACGATGTT GATTTGATTG
841 TGTTTTGTTT GGTTTCATCG ATCTTCAATT TTCATAATCA GATTCAGCTT TTATTATCTT
901 TACAACAACG TCCTTAATTT GATGATTCTT TAATCGTAGA TTTGCTCTAA TTAGAGCTTT
961 TTCATGTCAG ATCCCTTTAC AACAAGCCTT AATTGTTGAT TCATTAATCG TAGATTAGGG
1021 CTTTTTTCAT TGATTACTTC AGATCCGTTA AACGTAACCA TAGATCAGGG CTTTTTCATG
1081 AATTACTTCA GATCCGTAA ACAACAGCCT TATTTTTTAT ACTTCTGTGG TTTTCAAGA
1141 AATTGTTGAG ATCCGTTGAC AAAAAGCCTT ATTCGTTGAT TCTATATCGT TTTTCGAGAG
1201 ATATTGCTCA GATCTGTTAG CAACTGCCTT GTTTGTTGAT TCTATTGCCG TGGATTAGGG
1261 TTTTTTTTCA CGAGATTGCT TCAGATCCGT ACTTAAGATT ACGTAATGGA TTTTGATTCT
1321 GATTATCTG TGATTGTTGA CTCGACAGCG GCCGCACCGG CGCGCCATGG ATCCAGTAAG
1381 CGTGTGGGGT AACACGCCCT TGGCGACGGT GGATCCCGAG ATCCATGACC TCATCGAGAA
1441 GGAGAAGCGC CGTCAATGCC GCGGAATCGA GCTCATCGCC TCCGAGAACT TCACCTCCTT
1501 CGCCGTCATC GAGGCCCTCG GCAGCGCTCT CACGAACAAA TACTCCGAGG GCATGCCGGG

```

|      |            |            |            |            |             |            |
|------|------------|------------|------------|------------|-------------|------------|
| 1561 | CAACCGCTAC | TACGGCGGCA | ATGAATACAT | CGACCAGATC | GAAAACCTCT  | GCCGCTCAGG |
| 1621 | CGCCCTCCAA | GCCTTCCACC | TCGACGCCCA | ATCCTGGGGC | GTCAACGTCC  | AGCCCTACTC |
| 1681 | CGGCTCCCCG | GCCAACCTCG | CGCCCTACAC | CGCCGTCTCT | AACCCCCACG  | ACCGCATCAT |
| 1741 | GGGGCTAGAT | CTCCGCTCCG | GCGGCCACCT | CACCCACGGC | TACTACACCT  | CCGGCGGAAA |
| 1801 | GAAGATCTCC | GCCACCTCCA | TTTACTTCGA | GAGTCTCCCT | TACAAGGTAA  | ACTCCACCAC |
| 1861 | CGGCTACATC | GACTACGACC | GCTTGGAAGA | AAAAGCCCTA | GACTTCAGGC  | CAAAACTCAT |
| 1921 | AATCTGCGGT | GGCAGCGCGT | ACCCTCGCGA | TTGGGACTAC | AAACGTTTCA  | GGGAAAGTCG |
| 1981 | TGATAAGTGC | GGAGCATTGC | TTCTCTGCGA | CATGGCGCAC | ACTAGCGGCC  | TTGTGGCCGC |
| 2041 | GCAGGAAGTG | AACAGCCCTT | TCGAGTATTG | CGACATTGTG | ACCACCACGA  | CTCACAAGAG |
| 2101 | CTTGCGGGGC | CCACGTGCGG | GGATGATCTT | TTACCGGAAG | GGCCCCAAGC  | CGCCGAAGAA |
| 2161 | GGGGCAGCCG | GAGAACGCGG | TTTATGATTT | CGAGGACAAG | ATTAACTTCG  | CGGTGTTCCC |
| 2221 | TTGCGCTCAG | GGTGGGCCCC | ACAACCACCA | GATCGGTGCT | CTCGCCGTGG  | CGCTGAAGCA |
| 2281 | GGCCGCGTCG | CCCGGGTTTA | AGGCCATACG | GAAGCAGGTT | AAGGCGAACG  | CCGTTGCGCT |
| 2341 | TGGAAAATAC | TTGATGGGGA | AAGGTACAG  | CCTTGTCACT | GGCGGAACGG  | AGAACCATCT |
| 2401 | TGTTTTGTGG | GATCTGAGAC | CTCTTGGATT | GACTGGGTAT | AAGGTGGAGA  | AACTCTGTGA |
| 2461 | TCTCTGTAAC | ATTACTGTTA | ACAAGAACGC | TGTTTTTGGT | GATAGCAGTG  | CCTTGGCCCC |
| 2521 | TGGTGGAGTG | CGAATTGGTG | CCCCTGCCAT | GACTTCTAGG | GGTTTGGTTG  | AAAAAGACTT |
| 2581 | TGAGCAGATT | GGTGAGTTCC | TTACCGGTGC | TGTGACTCTC | ACACTGGAGA  | TCCAGAAGGA |
| 2641 | GCATGGCAAA | CTTCTCAAGG | ATTTCAACAA | GGGTCTCGTC | AACAACAAGG  | CTATTGAAGA |
| 2701 | TCTCAAAGCT | GATGTTGAGA | AGTTCTCTGC | CTTGTTTGAC | ATGCCTGGGT  | TCCTGGTATC |
| 2761 | TGAAATGAAG | TACAAGGATT | AGCCTAGGTT | CGAGTATTAT | GGCATTGGGA  | AAACTGTTTT |
| 2821 | TCTTGTACCA | TTTGTGTGTC | TTGTAATTTA | CTGTGTTTTT | TATTCGGTTT  | TCGCTATCGA |
| 2881 | ACTGTGAAAT | GGAAATGGAT | GGAGAAGAGT | TAATGAATGA | TATGGTCCCT  | TTGTTTATTC |
| 2941 | TCAAATTAAT | ATTATTTGTT | TTTTCTCTTA | TTTGTGTGTG | GTTGAATTTG  | AAATTATAAG |
| 3001 | AGATATGCAA | ACATTTTGTT | TTGAGTAAAA | ATGTTGCAAA | TCGTGGCCCT  | TAATGACCGA |
| 3061 | AGTTAATATG | AGGAGTAAAA | CACTTGTAGT | TGTACCATTA | TGCTTATTC   | CTAGGCAACA |
| 3121 | AATATATTTT | CAGACCTAGA | AAAGCTGCAA | ATGTTACTGA | ATACAAGTAT  | GTCCTCTTGT |
| 3181 | GTTTTAGACA | TTTATGAACT | TTCTTTATG  | TAATTTTCCA | GAATCCTTGT  | CAGATTCTAA |
| 3241 | TCATTGCTTT | ATAATTATAG | TTATACTCAT | GGATTGTAG  | TTGAGTATGA  | AAATATTTTT |
| 3301 | TAATGCATTT | TATGACTTGC | CAATTGATTG | ACAACATGCA | TCAATCCGCG  | GTTATGACTC |
| 3361 | TCTTAAGAGA | GTCATGAATT | CGAGCTTCCA | GAAGGTAATT | ATCCAAGATG  | TAGCATCAAG |
| 3421 | AATCCAATGT | TTACGGGAAA | AACTATGGAA | GTATTATGTG | AGCTCAGCAA  | GAAGCAGATC |
| 3481 | AATATGCGGC | ACATATGCAA | CCTATGTTCA | AAAATGAAGA | ATGTACAGAT  | ACAAGATCCT |
| 3541 | ATACTGCCAG | AATACGAAGA | AGAATACGTA | GAAATTGAAA | AAGAAGAACC  | AGGCGAAGAA |
| 3601 | AAGAATCTTG | AAGACGTAAG | CACGTACGAC | AACAATGAAA | AGAAGAAGAT  | AAGGTCGGTG |
| 3661 | ATTGTGAAAG | AGACATAGAG | GACACATGTA | AGGTGGAAAA | TGTAAGGGCG  | GAAAGTAACC |
| 3721 | TTATCACAAA | GGAATCTTAT | CCCCACTAC  | TTATCCTTTT | ATATTTTTTCC | GTGTCATTTT |
| 3781 | TGCCCTTGAG | TTTTCTTATA | TAAAGAACCA | AGTTCGGCAT | TTGTGAAAAC  | AAGAAAAAAT |
| 3841 | TTGGTGTAAG | CTATTTTCTT | TGAAGTACTG | AGGATACAAC | TTCAGAGAAA  | TTTGTAAGTT |
| 3901 | TGTGATCCAT | GGTGAGCAAG | GGCGAGGAGC | TGTTACACCG | GGTGGTGCCC  | ATCCTGGTGC |
| 3961 | AGCTGGACGG | CGACGTAAAC | GGCCACAAGT | TCAGCGTGTC | CGGCGAGGGC  | GAGGGCGATG |
| 4021 | CCACCTACGG | CAAGCTGACC | CTGAAGTTCA | TCTGCACCAC | CGGCAAGCTG  | CCCGTGCCCT |
| 4081 | GGCCACCCG  | CGTGACCACC | TTACCTACG  | CGCTGCAGTG | CTTCAGCCGC  | TACCCGACC  |
| 4141 | ACATGAAGCA | GCACGACTTC | TTCAAGTCCG | CCATGCCCCG | AGGCTACGTC  | CAGGAGCGCA |
| 4201 | CCATCTTCTT | CAAGGACGAC | GGCAACTACA | AGACCCGCGC | CGAGGTGAAG  | TTGAGGGCGG |
| 4261 | ACACCCCTGG | GAACCGCATC | GAGCTGAAGG | GCATCGACTT | CAAGGAGGAC  | GGCAACATCC |
| 4321 | TGGGGCACAA | GCTGGAGTAC | AACTACAACA | GCCACAACGT | CTATATCATG  | GCCGACAAGC |
| 4381 | AGAAGAACGG | CATCAAGGTG | AACTTCAAGA | TCCGCCACAA | CATCGAGGAC  | GGCAGCGTGC |
| 4441 | AGCTCGCCGA | CCACTACCAG | CAGAACACCC | CCATCGGCGA | CGGCCCCGTG  | CTGCTGCCCG |
| 4501 | ACAACCACTA | CCTGAGCACC | CAGTCCGCCC | TGAGCAAAAG | CCCCAACGAG  | AAGCGCGATC |
| 4561 | ACATGGTCCT | GCTGGAGTTC | GTGACCGCCG | CCGGGATCAC | TCACGGCATG  | GACGAGCTGT |
| 4621 | ACAAGTAAAG | CGGCCGCCCG | GCTGCAGATC | GTTCAACAT  | TTGGCAATAA  | AGTTTCTTAA |
| 4681 | GATTGAATCC | TGTTGCCGGT | CTTGCGATGA | TTATCATATA | ATTTCTGTTG  | AATTACGTTA |
| 4741 | AGCATGTAAT | AATTAACATG | TAATGCATGA | CGTTATTTAT | GAGATGGGTT  | TTTATGATTA |

**Supplemental Figure S2.** F-SHMT08c-CDS, insert size, vector, restriction enzymes, and sequenced positive clones used for cloning.

|      |             |            |             |             |             |             |       |            |             |             |             |             |             |
|------|-------------|------------|-------------|-------------|-------------|-------------|-------|------------|-------------|-------------|-------------|-------------|-------------|
| 4801 | GAGTCCCAGCA | ATTATACATT | TAATACGCGA  | TAGAAAACAA  | AATATAGCGC  | GCAAACCTAGG | 8041  | GCCTGCCCGG | CCTCCTCCTT  | CAAATCGTAC  | TCCGGCAGGT  | CATTTGACCC  | GATCAGCTTG  |
| 4861 | ATAAATTATC  | GCGCGCGGTG | TCATCTATGT  | TACTAGATCT  | GATGATAAGC  | TGTCAAACAT  | 8101  | CGCACGGTGA | AACAGAACTT  | CTTGAACCTT  | CCGGCGCTTG  | CAGTCCGGTT  | GTAGATCGTC  |
| 4921 | GAGAAATTAAT | TCGTAATCAT | GTCATAGCTG  | TTTCTCTGTG  | GAAATTTGTTA | TCCGCTCACAC | 8161  | TTGAAACAAC | ATCTGGGCTT  | TGCCTTGCCCT | CGGGCGCGGC  | GTGCCAGGCG  | GTAGAGAAAA  |
| 4981 | ATTCCACACA  | ACATACGAGC | CGGAAGCATA  | AAGTGTAAG   | CCTGGGGTGC  | CTAATGAGTG  | 8221  | CGGCCGATGC | CGGGATCGAT  | CAAAAAGTAA  | TCCGGGTGAA  | CCGTCAGCAC  | GTCCGGGTTC  |
| 5041 | AGCTAACTCA  | CATTAATTTG | CTGTGCCTCA  | CTGCGCGCTA  | TCCAGTCCGG  | AAACCTGTGCG | 8281  | TTGGCTTCTG | TGATCTCCGG  | GTACATCCAA  | TACAGTAGCT  | CGATCTCGAT  | GTACTCCGGC  |
| 5101 | TGCCAGCTGC  | ATTAATAGAT | GCGCCAGGAG  | GCGGGGAGAG  | CGGGTTTGGG  | TATTGGCTAG  | 8341  | CGCGGGGTTT | GCCTCTTTCG  | GATTTGTGTG  | CGGCTTAATCA | AGGCTTTCAC  | CTCGGATACC  |
| 5161 | AGCAATTCGG  | CGTTAATTCA | GTACATTAATA | AACGTCGCGA  | ATGTGTTTAT  | AAGTTGTCTA  | 8401  | GTCACCAAGC | GGCCGTTCTT  | GGCCTTCTTC  | GTACGCTGCA  | TGGCAACGTG  | CGTGGTGTTC  |
| 5221 | AGCGTCAATT  | TGTTTACACC | ACAATATATC  | CTGCCACCAG  | CCAGCCAAAC  | GCTCCCCGAC  | 8461  | AACCGAATGC | AGGTTTCTAC  | CAGGTCGTCT  | TTCTGCTTTC  | CGCCATCGGC  | TCCGCGGCGT  |
| 5281 | CGGCAGCTCG  | GCACAAAATC | ACCACTCGAT  | ACAGGCAGCC  | CATCAGTCCG  | GGACGGCGTC  | 8521  | AACCTTAGTA | GCTCCGCAAC  | GTGTGGACGG  | AACACGCGGC  | CGGGCTTGTC  | TCCGCTCCCT  |
| 5341 | AGCGGGAGAG  | CCGTTGTAA  | GCGGCAGACT  | TTGCTCATGT  | TACCGATGCT  | ATTCCGGAAG  | 8581  | TCCCGGTATC | GGTTCATGGA  | TTCGGTTAGA  | TGGGAAACCG  | CCATCAGTAC  | CAGGTCTGTA  |
| 5401 | ACGGCAACTA  | AGCTGCCGGG | TTTGAACAC   | GGATGATCTC  | GCGGAGGGTA  | GCATGTTGAT  | 8641  | TCCCAACAC  | TGCCATGCC   | GGCCGGCCCT  | GCGGAAACCT  | CTACGTGCCC  | GTCTGGAAGC  |
| 5461 | TGTAACGATG  | ACAGAGCGTT | GCTGCCTGTG  | ATCCAGATCA  | TGAACAATAA  | AACGTGCTCG  | 8701  | TCGTAGCGGA | TACCTCGCC   | AGCTCGTCGG  | TCACGCTTCG  | ACAGACGGAA  | AACGCCACAG  |
| 5521 | TTACATAAAC  | AGTAATACAA | GGGGTGTTAT  | GAGCCATATT  | CAACGGGAAA  | CGTCTTGCTC  | 8761  | TCCATGATGC | TGCGACTATC  | GCGGGTGCCC  | ACGTGATAGA  | GCATCGGAAC  | GAAAAAATCT  |
| 5581 | TAGCCCGCGA  | TTAAATTCCA | ACATGGATGC  | TGATTATAT   | GGGTATAAAT  | GGGCTCGCGA  | 8821  | GGTTGCTCGT | CGCCCTTGCG  | CGGCTTCCTA  | ATCGACGCGC  | CACCGCGGCT  | CGGCGGTTGC  |
| 5641 | TAATGTCCGG  | CAATCAGGTG | CGACAATCTA  | TCGATTGTAT  | GGGAAGCCCG  | ATGCGCCAGA  | 8881  | CGGGATCTCT | TGCGGATTCG  | ATCAGCGCGC  | GCTTGCCACG  | ATTCACCGGG  | CGGTGCTTCT  |
| 5701 | TTGTTTCTTG  | AAACATGCGA | AGAGTACGCT  | TGCCAATGAT  | GTACAGAGAT  | AGATGGTTCAG | 8941  | GCTTCGATGC | TTTGCCGCTG  | GCGGCGCTGC  | CGGCGCTTCA  | ACTTCTCCAC  | CAGGTCATCA  |
| 5761 | ACTAAACTGG  | CTGACGGAAT | TTATGCTCTC  | TCCGACCATC  | AAGCATTTTA  | TCCGTACTCC  | 9001  | CCCAGCGCGC | CGCCGATTTG  | TACCGGGCGC  | GATGGTTTGC  | GACCGTCACG  | CCGATTCTCT  |
| 5821 | TGATGATGCA  | TGGTTACTCA | CCACTGCGAT  | CCCCGGGAAA  | ACAGCATTTCC | AGGTATTAGA  | 9061  | GGGCTTGGGG | GTTCAGTGC   | CATTGACAGG  | CCGCGACAGC  | ACCCAGCCGC  | TTACGCTCTG  |
| 5881 | AGAATATCTC  | GATTCAGGTG | AAAATATTGT  | TGATGCGCTG  | CGAGTGTGCC  | TGCGCCGGTT  | 9121  | CCAACGCCCT | CTGCTTCCAC  | ACATGGGGCA  | TCCACGCGCG  | TCGGTGCCCTG | GTGTGTTCTG  |
| 5941 | GCATTCGATT  | CCTGTTTGTA | ATTGTCCTTT  | TAACAGCGAT  | CGCGTATTTC  | GTCTCGCTCA  | 9181  | ATTTTCCATG | CGCCCTCCTT  | TAGCCGCTAA  | AATTATCTA   | CTCATTTTAT  | CATTGCTCTA  |
| 6001 | GGCGCAATCA  | CGAATGAATA | ACGGTTTGGT  | TGATGCGAGT  | GATTTTGTAT  | ACGAGCGTAA  | 9241  | TTTACTCTGG | TAGCTGCGCG  | ATGTATTGAT  | ATAGCAGCTC  | GGTAATGGTC  | TTGCCCTTGGC |
| 6061 | TGGCTGGCCT  | GTTGAACAAG | TCTGGAAGAA  | AATGCATAAA  | CTTTTGCCAT  | TCTCACCAGG  | 9301  | GTACCGCGTA | CATCTTTCAGC | TTGGTGTGAT  | CCTCCGCGCG  | CAACTGAAAG  | TTGACCCGCT  |
| 6121 | TTCACTGCTC  | ACTCATGGTG | ATTTCTCAGT  | TGATAACCTT  | ATTTTTCAGC  | AGGGGAAAT   | 9361  | TCATGCTGCG | CGTGTCTGCC  | AGGCTGGCCA  | ACGTTGACAG  | CTTGCTGCTG  | CGTGCCTGCG  |
| 6181 | AATAGGTTGT  | ATTGATGTTG | GACGAGTCGG  | AATCGCAGAC  | CGATACCAGG  | ATCTTGCCAT  | 9421  | GACGCGCGCG | ACTTAGCGTG  | TTTGTGCTTT  | TGCTCATTTT  | CTCTTTACCT  | CATTAATCTA  |
| 6241 | CCTATGGAAC  | TGCTCCGGTG | AGTTTTCTCC  | TTCATTACAG  | AAACGGCTTT  | TTCAAAAAAT  | 9481  | AATGAGTTTT | GATTTAATTT  | CAGCGGCGAG  | CGCCTTGACCT | TCGCGGGCAG  | CGTCCGCTTC  |
| 6301 | TGGTATTGAT  | AACTCTGATA | TGAATAAAT   | GCAGTTTACG  | TGATGCTGCG  | ATGAGTTTTT  | 9541  | GGGTTCTGAT | TCAAGAACGG  | TTGTGCCGCG  | GGCGGCGATG  | CCTGGGTAGC  | TCACGCGCTG  |
| 6361 | CTAAGAATTA  | ATTCATGATC | CTGCATGACC  | AAAATCCCTT  | AACGTGAGTT  | TTCGTTCCAC  | 9601  | CGTGATACGC | GACCTCAAGAA | TGGGCGAGTC  | GTACCCGCGC  | AGCGCCTCGT  | CAACTCACC   |
| 6421 | TGAGCGTCA   | ACCCCGTAGA | AAAGATCAAA  | GGATCTTCTT  | GAGATCCTTT  | TTTTCTGCGC  | 9661  | GCCGATGCGC | GTGCTTTTGA  | TCGCGGCGTA  | CACGACAAG   | CGCGCTTGTA  | GCCTTCCATC  |
| 6481 | GTAATCTGCT  | GCTTCAAAAC | AAAAAAACAA  | CCGCTTACCAG | CGGTGGTTTG  | TTTGCCGGAT  | 9721  | CGTGACCTCA | ATGCGCTGCT  | TAACCAGCTC  | CACCAGGTCG  | GCGGTGGCCC  | ATATGTCGTA  |
| 6541 | CAAGAGCTAC  | CAACTCTTTT | TCCGAAGGTA  | ACTGGCTTCA  | GCAGAGCGCA  | GATACCAAA   | 9781  | AGGGCTTGGC | TGACACGGAA  | TACGACGAA   | GTCCGCTGCC  | TTGATCGCGG  | ACACAGCCAA  |
| 6601 | ACTGCTCTTC  | TAGTGATGCC | TAGTTAGGCC  | CACCACTCTG  | AGAACTCTGT  | AGCAGCGCCT  | 9841  | GTCCGCGCCT | TGGGCGCTCT  | CGTGCATCAC  | TACGAAGTGC  | CGCGGCGCGA  | TGGCTTCCAC  |
| 6661 | ACATAGCTCG  | CTCTGCTAAT | CCTGTTTACCA | GTGGCTGCTG  | CCAGTGGCGA  | TAAGTCTGTG  | 9901  | GTCCGCGTCA | ATCGTCGGGC  | GGTCGATGCC  | GACAACGGTT  | AGCGGTTGAT  | CTTCCGCGAC  |
| 6721 | CTTACCGGGT  | TGGACTCAAG | ACGATAGTTA  | CCGGATAAGG  | CGCAGCGGTC  | GGGCTGAACG  | 9961  | GGCCGCCCAA | TCGCGGGGAC  | TGCCCTGGGG  | ATCGGAATCG  | ACTAACAGAA  | CATCGGCCCC  |
| 6781 | GGGGGTTCTG  | GCACACAGCC | CAGCTTGAG   | CGAACGACCT  | ACACCGAACT  | GAGATACCTA  | 10021 | GGCGAGTTGC | AGGGCGCGGG  | CTAGATGGGT  | TGCGATGGTC  | GTCTTGCCCTG | ACCCGCCCTT  |
| 6841 | CAGCGTGAGC  | TATGAGAAAG | CGCCACGCTT  | CCCGAAGGGA  | GAAAGCGCGA  | CAGGATATCCG | 10081 | CTGGTTAAGT | ACAGCGATAA  | CCTTCATGCG  | TTCCCTTTGC  | GTATTTGTTT  | ATTTACTCAT  |
| 6901 | GTAAGCGGCA  | GGTCCGGAAC | ACGAGAGCGC  | ATCGAGGGAG  | TCCAGGGGGG  | AAACGCTGGG  | 10141 | CGCATCATAT | ACGACGACAC  | CGCATGACGC  | AAGCTGTTTT  | ACTCAAATAC  | ACATCACCTT  |
| 6961 | TATCTTTTAA  | GTCCTGTGCG | GTTTCGCCAC  | CTCTGACTTG  | AGCGTCGATG  | TTTGTGATGC  | 10201 | TTTAGACGCG | GGCGCTCGGT  | TTCTTCAGCG  | GCCAAGCTTG  | CCGCGCAGG   | CGCCAGCTTG  |
| 7021 | TCGTCAGGGG  | GGCGGAGCCT | ATGGAATAAT  | GCCAGCAACG  | CGGCCCTTTT  | ACGGTTCTTG  | 10261 | GCATCAGACA | AACCGGCGAG  | GATTTTCATGC | AGCCGACAGG  | TTGAGCAGTG  | CGCGGGCGGC  |
| 7081 | GCCTTTTGCT  | GGCCTTTTGC | TCACATGTTT  | TTTCTCGGCT  | TATCCCTGTA  | TCTGTGGAT   | 10321 | TCGAACACGT | ACCCGCGCGC  | GATCATCTCC  | GCCTCGATCT  | CTTCGGTAAT  | GAAAAACGGT  |
| 7141 | AACCGTATTA  | CCGCCCTTGA | GTGAGCTGAT  | ACCGCTCGCC  | GCAGCCGAAC  | GACCGAGCGC  | 10381 | TCGTCCTGCT | CGTCTGTTGT  | CGGTTTTCAT  | CTTGTTCTCT  | TTGGCGTTTA  | TCTCGGCGG   |
| 7201 | AGCGAGTCTG  | TGAGCGGAGA | AGCGGAAGAG  | CGCCTGATGC  | GGTATTTTCT  | CCTTAGCAGT  | 10441 | CCGCGAGGCG | GTGCGGCTCG  | GTCAATGCGT  | CCTACGGA    | GGCACGCGC   | CGCGTGGCCT  |
| 7261 | CTGTGCGGTA  | TTTCAACCGC | CATATGGTGC  | ACTCTCAGTA  | AAATCTGCTG  | TGATGCCGCA  | 10501 | CGGTGGGCGT | CACCTTCTCG  | CTGCGCTCAA  | GTGCGCGGTA  | CAGGTCGAG   | CGATGCACGC  |
| 7321 | TAGTTAAGCC  | AGTATACACT | CCGCTATCGC  | TACGTGACTG  | GGTCATGGCT  | GCGCCCCGAC  | 10561 | CAAGCAGTGC | AGCCGCTCTT  | TTACGCTGTC  | GGCCTTCTGT  | GTGATCAGC   | TCCGCGGCGT  |
| 7381 | ACCCGCAAC   | ACCCGCTGAC | GCGCCCTGAC  | GGGCTTGTCT  | GCTCCGCGCA  | TCCGCTTACA  | 10621 | GCGCGATCTG | TGCGGGGGTG  | AGGGTAGGGC  | GGGGGCCAAA  | CTTACGCGCT  | CGCGCTTTGG  |
| 7441 | GACAAGCTGT  | GACCGTCTGC | GGGAGCTGCA  | TGTGTACAGG  | GTTTTCACCG  | TCATCCCGCA  | 10681 | CGGCCCTCGC | CCCGCTCCGG  | GTGCGGTGCA  | TGATTAGGGA  | ACGCTCGAAC  | TCCGCAATGC  |
| 7501 | AACGCGCGAG  | GACGGGTGCC | TTGATGTGGA  | CGCGGGCGGT  | CGAGTGGCGA  | CAGCAGCGGT  | 10741 | CGGCGAACAC | GGTCAACAC   | ATGCGGCGCG  | CCGCGGTGGT  | GGTGTCCGCG  | CACGCGCTCG  |
| 7561 | TGTCGCGGCC  | CTGTGATGAT | GCCTGGCCGT  | AGGCCAGCCA  | TTTTTGAGCG  | GCCAGCGGCC  | 10801 | CGAGCTACG  | CAGCCGCGCG  | CGCGCTCTCT  | CGGCTGAGTT  | GGCAATGTCC  | AGTAGTGC    |
| 7621 | GCGATAGGCC  | GACGCGAAGC | GGCGGGGCGT  | AGGGAGCGCA  | GCGACCGAAG  | GGTAGGCGCT  | 10861 | GGGTGCTGCG | GGCCAGGCGG  | TCTAGCCTGG  | TCATGTCTAC  | AACGTGCGCA  | GGGCGTAGGT  |
| 7681 | TTTTGACGCT  | CTTCGGCTGT | GCGCTGGCCA  | CAGAGCTTAT  | CACAGGCGAG  | CGGGGTTTTA  | 10921 | GGTCAAGCAT | CCTGGCCACG  | TCCGGGCGGT  | CGCGCTGTTG  | GCCGGTGATC  | TTCTCGGAAA  |
| 7741 | AGAGTTTTAA  | TAAAGTTTTA | AGAGTTTTAG  | GCGGAAAAAT  | CGCCTTTTTT  | CTCTTTTATA  | 10981 | ACAGCTTTGT | GACGCGCGCG  | CGGTGCAAGT  | CGGCGCTGCT  | TTGGTCAAG   | CTCTGGTGC   |
| 7801 | TCAGTCACTT  | ACATGTGTGA | CCGGTTCCCA  | ATGTACGGCT  | TTGGGTTCCC  | AATGTACGGG  | 11041 | CGGTGCTGAC | GCGGCGATAG  | CCCAGCAGGC  | CAGCGGCGGC  | GCTCTGTTC   | ATGGCGTAAT  |
| 7861 | TTTCCGGTTC  | CAATGTACGG | CTTTGGGTTT  | CCAATGTACG  | TGATATCCAC  | AGGAAAGAGT  | 11101 | GTCTCCGGTT | TGATGCGCAA  | GTATTCTACT  | TTATGCACT   | AAAAACACGC  | ACAGAAAAAC  |
| 7921 | CCTTTTTCGAC | CTTTTTCGCC | TGCTAGGGCA  | ATTTGCCCTA  | GCATCTGCTC  | CGTACATTAG  | 11161 | GCCAGGAAAA | GCGGAGGCGG  | GCAGCTGTGC  | CGCTAAGTAA  | GGACTTGTGC  | GACATGTGCT  |
| 7981 | GAACCGGCGG  | ATGCTTCGCC | CTCGATCAGG  | TTGCGGTAGC  | GCATGACTAG  | GATCGGGCCA  | 11221 | TTTCAAGA   | CGGCTGCACT  | GAACGTCAGA  | AGCCGACTGC  | ACTATAGCAG  | CGGAGGGGTT  |
|      |             |            |             |             |             |             | 11281 | GGATCAAA   | AGT         |             |             |             |             |

**Supplemental Figure S2.** F-SHMT08c-CDS, insert size, vector, restriction enzymes, and sequenced positive clones used for cloning.

**Gene Name** F-SHMT08cΔ+Y59A-CDS

**Cloning Vector** pG2RNAi2

**Length (bp)** 1430

**Cloning Sites** Ascl-AvrII

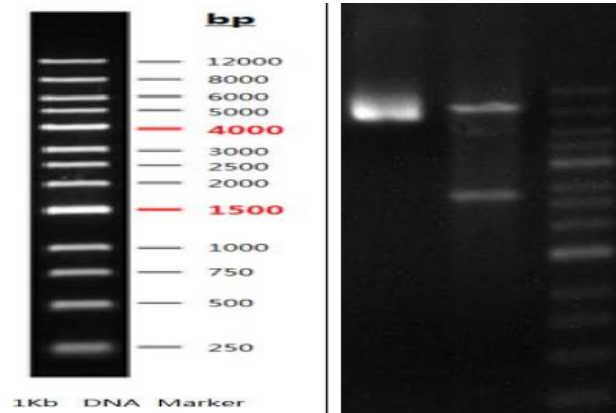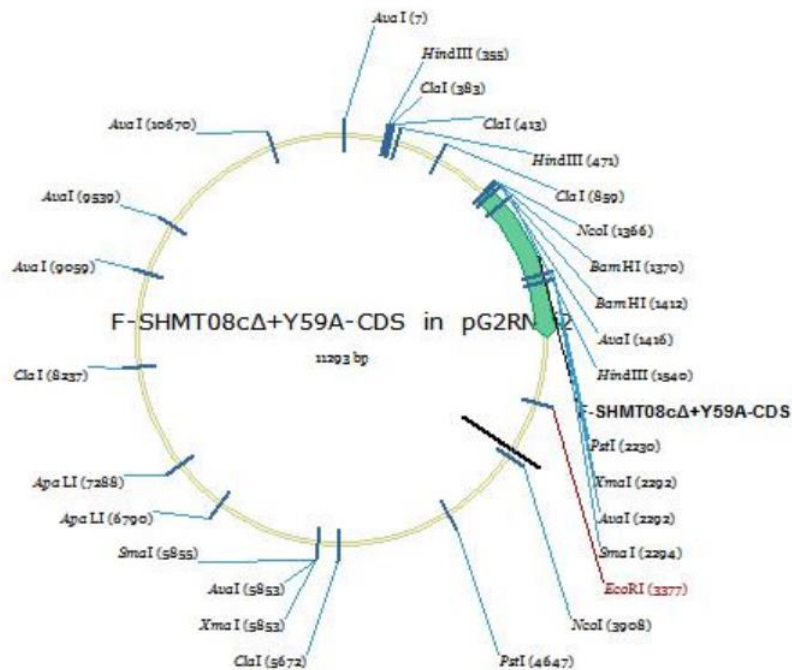

**Supplemental Figure S3.** F-SHMT08cΔ+Y59A-CDS, insert size, vector, restriction enzymes, and sequenced positive clones used for cloning.

## Detailed Sequence of the Whole Construct:

```

1  TTGATCCCGA GGGGAACCCCT GTGGTTGGCA TGCACATACA AATGGACGAA CGGATAAACC
61  TTTTCACGCC CTTTTAAATA TCCGTTATTC TAATAAACGC TCTTTTCTCT TAGGTTTACC
121 CGCCAATATA TCCTGTCAAA CACTGATAGT TTAAACTGAA GGCGGGAAAC GACAATCTGA
181 TCCAAGCTCA AGCTCATTCG CCATTCAGGC TGCGCAACTG TTGGGAAGGG CGATCGGTGC
241 GGGCCTCTTC GCTATTACGC CAGCTGGCGA AAGGGGGATG TGCTGCAAGG CGATTAAGTT
301 GGGTAACGCC AGGGTTTTCC CAGTCACGAC GTTGTA AAAC GACGGCCAGT GCCAAGCTTA
361 TTACCCTGTT ATCCCTAGAT ATCGATTTTG GCTACCTTAA GGTAGCCAAA ATCGATCACT
421 AGTGC GGCCG CGGGCCCAAT ATAACAACGA CGTCGTAACA GATAAAGCGA AGCTTGAAGG
481 TGCATGTGAC TCCGTCAAGA TTACGAAACC GCCAACTACC ACGCAAATTG CAATTCTCAA
541 TTTCTTAGAA GGACTCTCCG AAAATGCATC CAATACCAA TATTACCCGT GTCATAGGCA
601 CCAAGTGACA CCATACATGA ACACGCGTCA CAATATGACT GGAGAAGGGT TCCACACCTT
661 ATGCTATAAA ACGCCCCACA CCCCTCCTCC TTCCTTCGCA GTTCAATTCC AATATATTCC
721 ATTCTCTCTG TGTATTTCCC TACCTCTCCC TTCAAGGTTA GTCGATTTCT TCTGTTTTTC
781 TTCTTCGTTT TTTCCATGAA TTGTGTATGT TCTTTGATCA ATACGATGTT GATTTGATTG
841 TGTTTTGTTT GGTTTCATCG ATCTTCAATT TTCATAATCA GATTCAGCTT TTATTATCTT
901 TACAACAACG TCCTTAATTT GATGATTCTT TAATCGTAGA TTTGCTCTAA TTAGAGCTTT
961 TTCATGTCAG ATCCCTTTAC AACAAGCCTT AATTGTTGAT TCATTAATCG TAGATTAGGG
1021 CTTTTTTCAT TGATTACTTC AGATCCGTTA AACGTAACCA TAGATCAGGG CTTTTTCATG
1081 AATTACTTCA GATCCGTTAA ACAACAGCCT TATTTTTTAT ACTTCTGTGG TTTTTCAGA
1141 AATTGTTGAG ATCCGTTGAC AAAAAAGCCTT ATTCGTTGAT TCTATATCGT TTTTCGAGAG
1201 ATATTGCTCA GATCTGTTAG CAACTGCCTT GTTTGTTGAT TCTATTGCCG TGGATTAGGG
1261 TTTTTTTTCA CGAGATTGCT TCAGATCCGT ACTTAAGATT ACGTAATGGA TTTTGATTCT
1321 GATTTATCTG TGATTGTTGA CTCGACAGC G GCGCACCCGG CGCGCCATGG ATCCAGTAAG
1381 CGTGTGGGGT AACACGCCCT TGGCGACGGT GGATCCCGAG ATCCATGACC TCATCGAGAA
1441 GGAGAAGCGC CGTCAATGCC GCGGAATCGA GCTCATCGCC TCCGAGAACT TCACCTCCTT
1501 CGCCGTCATC GAGGCCCTCG GCAGCGCTCT CACGAACAAA GCTTCCGAGG GCATGCCGGG

```

|      |             |             |            |             |             |            |
|------|-------------|-------------|------------|-------------|-------------|------------|
| 1561 | CAACCGCTAC  | TACGGCGGCA  | ATGAATACAT | GGACCAGATC  | GAAAAACCTCT | GCCGCTCACG |
| 1621 | CGCCCTCCAA  | GCCTTCCACC  | TCGACGCCCA | ATCCTGGGGC  | GTCAACGTCC  | AGCCCTACTC |
| 1681 | CGGCTCCCCG  | GCCAACCTCG  | CCGCTACAC  | CGCCGTCTCT  | AACCCCAACG  | ACCGCATCAT |
| 1741 | GGGGCTAGAT  | CTCCGCTCCG  | GCGGCCACCT | CACCCACGGC  | TACTACACCT  | CCGGCGGAAA |
| 1801 | GAAGATCTCC  | GCCACCTCCA  | TTTACTTCGA | GAGTCTCCCT  | TACAAGGTAA  | ACTCCACCAC |
| 1861 | CGGCTACATC  | GACTACGACC  | GCTTGGAAGA | AAAAGCCCTA  | GACTTCAGGC  | CAAAACTCAT |
| 1921 | AATCTGCGGT  | GGCAGCGCGT  | ACCCTCGCGA | TTGGGACTAC  | AAACGTTTCA  | GGGAAGTCGC |
| 1981 | TGATAAGTGC  | GGAGCATTGC  | TTCTCTGCGA | CATGGCGCAC  | ACTAGCGGCC  | TTGTGGCCGC |
| 2041 | GCAGGAAGTG  | AACAGCCCTT  | TCGAGTATTG | CGACATTGTG  | ACCACCACGA  | CTCACAAGAG |
| 2101 | CTTGCGGGGC  | CCACGTGCGG  | GGATGATCTT | TTACCGGAAG  | GGCCCCAAGC  | CGCCGAAGAA |
| 2161 | GGGGCAGCCG  | GAGAACGCGG  | TTTATGATTT | CGAGGACAAG  | ATTAACCTCG  | CGGTGTTCCC |
| 2221 | TTGCTGTCAG  | GGTGGGCCCC  | ACAACCACCA | GATCGGTGCT  | CTCGCCGTGG  | CGCTGAAGCA |
| 2281 | GGCCGCGTCG  | CCCGGGTTTA  | AGGCCTACGC | GAAGCAGGTT  | AAGGCGAACG  | CCGTGTCGCT |
| 2341 | TGGAATAATAC | TTGATGGGGA  | AAGGGTACAG | CCTTGTCACT  | GGCGGAACGG  | AGAACCATCT |
| 2401 | TGTTTTGTGG  | GATCTGAGAC  | CTCTTGGATT | GACTGGGTAT  | AAGGTGGAGA  | AACTCTGTGA |
| 2461 | TCTCTGTAAC  | ATTACTGTTA  | ACAAGAACGC | TGTTTTTGGT  | GATAGCAGTG  | CCTTGGCCCC |
| 2521 | TGGTGGAGTG  | CGAATTGGTG  | CCCCTGCCAT | GACTTCTAGG  | GGTTTGGTTG  | AAAAAGACTT |
| 2581 | TGAGCAGATT  | GGTGAGTTCC  | TTCAACGTGC | TGTGACTCTC  | ACACTGGAGA  | TCCAGAAGGA |
| 2641 | GCATGGCAAA  | CTTCTCAAGG  | ATTTCACAA  | GGGTCTCGTC  | AACAACAAGG  | CTATTGAAGA |
| 2701 | TCTCAAAGCT  | GATGTTGAGA  | AGTCTCTGTC | CTTGTGTTGAC | ATGCTCTGGCT | TCCTGGTATC |
| 2761 | TGAAATGAAG  | TACAAGGATT  | AGCCTAGGTT | CGAGTATTAT  | GGCATTGGGA  | AAACTGTTTT |
| 2821 | TCTTGTACCA  | TTTGTGTTGC  | TTGTAATTTA | CTGTGTTTTT  | TATTCGGTTT  | TCGCTATCGA |
| 2881 | ACTGTGAAAT  | GGAAATGGAT  | GGAGAAGAGT | TAATGAATGA  | TATGGTCTCT  | TTGTTCATTC |
| 2941 | TCAAATTAAT  | ATTATTTGTT  | TTTTCTCTTA | TTTGTGTGTG  | GTTGAATTTG  | AAATTATAAG |
| 3001 | AGATATGCAA  | ACATTTTGTG  | TTGAGTAAAA | ATGTGTCAAA  | TCGTGGCCTC  | TAATGACCGA |
| 3061 | AGTTAATATG  | AGGAGTAAAA  | CACCTGTAGT | TGTACCATTA  | TGCTTATTCA  | CTAGGCAACA |
| 3121 | AATATATTTT  | CAGACCTAGA  | AAAGCTGCAA | ATGTTACTGA  | ATACAAGTAT  | GTCCTCTTGT |
| 3181 | GTTTTAGACA  | TTTATGAACT  | TTCTTTTATG | TAATTTTCCA  | GAATCCTTGT  | CAGATTCTAA |
| 3241 | TCATTGCTTT  | ATAATTATAG  | TTATACTCAT | GGATTTGTAG  | TTGAGTATGA  | AAATATTTTT |
| 3301 | TAATGCATTT  | TATGACTTGC  | CAATTGATTG | ACAACATGCA  | TCAATCCGCG  | GTTATGACTC |
| 3361 | TCTTAAGAGA  | GTCATGAATT  | CGAGCTTCCA | GAAGGTAATT  | ATCCAAGATG  | TAGCATCAAG |
| 3421 | AATCCAATGT  | TTACGGGAAA  | AACTATGGAA | GTATTATGTG  | AGCTCAGCAA  | GAAGCAGATC |
| 3481 | AATATGCGGC  | ACATATGCAA  | CCTATGTTCA | AAAATGAAGA  | ATGTACAGAT  | ACAAGATCCT |
| 3541 | ATACTGCCAG  | AATACGAAGA  | AGAATACGTA | GAAATTGAAA  | AAGAAGAACC  | AGGCGAAGAA |
| 3601 | AAGAATCTTG  | AAGACGTAAG  | CACTGACGAC | AACAATGAAA  | AGAAGAAGAT  | AAGGTCGGTG |
| 3661 | ATTGTGAAAG  | AGACATAGAG  | GACACATGTA | AGGTGGAAAA  | TGTAAGGGCG  | GAAAGTAACC |
| 3721 | TTATCACAAA  | GGAATCTTAT  | CCCCCACTAC | TTATCCTTTT  | ATATTTTTTCC | GTGTCATTTT |
| 3781 | TGCCCTTGAG  | TTTTCTCTATA | TAAGGAACCA | AGTTCGGCAT  | TTGTGAAAAC  | AAGAAAAAAT |
| 3841 | TTGGTGTAAG  | CTATTTTCTT  | TGAAGTACTG | AGGATACAAC  | TTCAGAGAAA  | TTTGTAAGTT |
| 3901 | TGTGATCCAT  | GGTGAGCAAG  | GGCGAGGAGC | GGTTACCGG   | GGTGGTGCCC  | ATCCTGGTCG |
| 3961 | AGCTGGACGG  | CGACGTAAAC  | GGCCACAAGT | TCAGCGTGTC  | CGGCGAGGGC  | GAGGGCGATG |
| 4021 | CCACCTACGG  | CAAGCTGACC  | CTGAAGTTCA | TCTGCACCAC  | CGGCAAGCTG  | CCCGTGCCCT |
| 4081 | GGCCACCCCT  | CGTGACCACC  | TTCACTACG  | GCGTGCAAGT  | CTTCAGCCGC  | TACCCCGACC |
| 4141 | ACATGAAGCA  | GCACGACTTC  | TTCAAGTCCG | CCATGCCCGA  | AGGCTACGTC  | CAGGAGCGCA |
| 4201 | CCATCTTCTT  | CAAGGACGAC  | GGCAACTACA | AGACCCGCGC  | CGAGGTGAAG  | TTGAGGGCG  |
| 4261 | ACACCTGGT   | GAACCGCATC  | GAGCTGAAGG | GCATCGACTT  | CAAGGAGGAC  | GGCAACATCC |
| 4321 | TGGGGCACAA  | GCTGGAGTAC  | AACTACAACA | GCCACAACGT  | CTATATCATG  | GCCGACAAGC |
| 4381 | AGAAGAACGG  | CATCAAGGTG  | AACCTCAAGA | TCCGCCACAA  | CATCGAGGAC  | GGCAGCGTGC |
| 4441 | AGCTCGCCGA  | CCACTACCAG  | CAGAACACCC | CCATCGGCGA  | CGGCCCCGTG  | CTGCTGCCCC |
| 4501 | ACAACCACTA  | CCTGAGCACC  | CAGTCCGCC  | TGAGCAAAGA  | CCCCAACGAG  | AAGCGCGATC |
| 4561 | ACATGGTCCT  | GCTGGAGTTC  | GTGACCGCGG | CCGGGATCAC  | TCACGGCATG  | GACGAGCTGT |
| 4621 | ACAAGTAAAG  | CGGCCGCCCC  | GCTGCAGATC | GTTCAAACAT  | TTGGCAATAA  | AGTTTCTTAA |
| 4681 | GATTGAATCC  | TGTTGCCGGT  | CTTGCGATGA | TTATCATATA  | ATTTCTGTG   | AATTACGTTA |
| 4741 | AGCATGTAAT  | AATTAACATG  | TAATGCATGA | CGTTATTTAT  | GAGATGGGTT  | TTTATGATTA |

**Supplemental Figure S3.** F-SHMT08 $\Delta$ +Y59A-CDS, insert size, vector, restriction enzymes, and sequenced positive clones used for cloning.

|      |             |            |             |             |             |             |       |             |             |             |             |             |             |
|------|-------------|------------|-------------|-------------|-------------|-------------|-------|-------------|-------------|-------------|-------------|-------------|-------------|
| 4801 | GAGTCCCAGCA | ATTATACATT | TAATACGCGA  | TAGAAAACAA  | AATATAGCGC  | GCAAACCTAGG | 8041  | GCCTGCCCGG  | CCTCCTCCTT  | CAAATCGTAC  | TCCGGCAGGT  | CATTTGACCC  | GATCAGCTTG  |
| 4861 | ATAAATTATC  | GCGCGCGGTG | TCATCTATGT  | TACTAGATCT  | GATGATAAGC  | TGTCAAACAT  | 8101  | CGCACGGTGA  | AACAGAACTT  | CTTGAACCTC  | CCGGCGCTGT  | CAGTCCGGTT  | GTAGATCGTC  |
| 4921 | GAGAATTAAAT | TCGTAATCAT | GTCATAGCTG  | TTTCTCTGTG  | GAAATTTGTTA | TCCGCTCACAA | 8161  | TTGAAACAACC | ATCTGGGCTTC | TGCCTTGCCCT | CGCGCCAGGCG | GTGGCAGGAA  | GTAGAGAAAA  |
| 4981 | ATTCCACACA  | ACATACGAGC | CGGAAGCATA  | AAGTGTAAG   | CCTGGGGTGC  | CTAATGAGTG  | 8221  | CGGCCGATGC  | CGGGATCGAT  | CAAAAAGTAA  | TCCGGGTGAA  | CCGTCAGCAC  | GTCCGGGTTC  |
| 5041 | AGCTAACTCA  | CATTAATTTG | CTGTGCCTCA  | CTGCCCCGAT  | TCCAGTCCGG  | AAACCTGTGTC | 8281  | TTGGCTTCTG  | TGATCTCCGG  | GTACATCCAA  | TACAGTAGCT  | CGATCTCGAT  | GTACTCCGGC  |
| 5101 | TGCCAGCTGC  | ATTAATAGTC | GCGCCACGCA  | GCGGCGGAG   | CGGGTTTGGG  | TATTGGCTAG  | 8341  | CGCGGGGTTT  | GCCTCTTTAT  | GATTCTGTAG  | CGGCTAATCA  | AGGCTTCCAC  | CTCGGATACC  |
| 5161 | AGCAATTCCG  | CGTTAATTCA | GTACATTAATA | AACGTCGCGA  | ATGTGTTATT  | AAGTTGTCTA  | 8401  | GTCACCAAGC  | GGCCGTTCTT  | GGCCTTCTTC  | GTACGCTGCA  | TGGCAACGTG  | CGTGGTGTTC  |
| 5221 | AGCGTCAATT  | TGTTTACACC | ACAATATATC  | CTGCCACCAG  | CCAGCCAAACA | GCTCCCCGAC  | 8461  | AACCGAATGC  | AGGTTTCTAC  | CAGGTCGTCT  | TTCTGCTTTC  | CGCCATCGGC  | TCCCGGCGCT  |
| 5281 | CGGCAGCTCG  | GCACAAAATC | ACCACTCGAT  | ACAGGCAGCC  | CATCAGTCCG  | GGACGGCGTC  | 8521  | AACCTTAGTA  | GCTCCGCAAC  | GTGTGGACGG  | AACACGCGGC  | CGGGCTTGTC  | TCCCTTCCAG  |
| 5341 | AGCGGGAGAG  | CCGTTGTAAG | GCGGCAGACT  | TTGCTCATGT  | TACCGATGCT  | ATTCCGGAAGA | 8581  | TCCCGGTATC  | GGTTCATGGA  | TTCGGTTAGA  | TGGGAAACCG  | CCATCAGTAC  | CAGGTCTGTA  |
| 5401 | ACGGCAACTA  | AGCTGCCGGG | TTTGAACAC   | GGATGATCTC  | GCGGAGGGTA  | GCATGTTGAT  | 8641  | TCCCAACAC   | TGCCATGCC   | GGCCGGCCCT  | GCGGAAACCT  | CTACGTCGCC  | GTCTGGAAGC  |
| 5461 | TGTAACGATG  | ACAGAGCGTT | GCTGCCTGTG  | ATCCAGATCA  | TGAACAATAA  | AACCTGCTCG  | 8701  | TCGTAGCGGA  | TACCTCGCC   | AGCTCGTCGG  | TCACGCTTCG  | ACAGACGGAA  | AACGCCACAG  |
| 5521 | TTACATAAAC  | AGTAATACAA | GGGGTGTTAT  | GAGCCATATT  | CAACGGGAAA  | CGTCTTGCTC  | 8761  | TCCATGATGC  | TGCGACTATC  | GCGGGTGCCC  | ACGTCATAGA  | GCATCGGAAC  | GAAAAAATCT  |
| 5581 | TAGCCCGCGA  | TTAAATTCCA | ACATGGATGC  | TGATTATAT   | GGGTATAAAT  | GGGCTCGCGA  | 8821  | GGTTGCTCGT  | CGCCCTTGCG  | CGGCTTCCTA  | ATCGACGCGC  | CACCGCGTGC  | CGGCGGTTGC  |
| 5641 | TAAATGTCGG  | CAATCAGGTG | CGACAATCTA  | TCGATTGTAT  | GGGAAGCCCG  | ATGCGCCAGA  | 8881  | CGGGATCTCT  | TGCGGATTCT  | ATCAGCGCGC  | GCTTGCCACG  | ATTCACCTGG  | CGGTGCTTCT  |
| 5701 | TTGTTTCTTG  | AAACATGGCA | AGAGTAGCGT  | TGCCAATGAT  | TTTACAGATG  | AGATGGTTCAG | 8941  | GCTCTGATGC  | TTTCCGCTGT  | GCGCGCCTGC  | GCGGCTCTCA  | ACTTCTCCAC  | CAGGTCATCA  |
| 5761 | ACTAAACTGG  | CTGACGGAAT | TTATGCTCTC  | TCCGACCATC  | AAGCATTTTA  | TCCGTACTCC  | 9001  | CCCAGCGCGC  | CGCCGATTTG  | TACCGGGCCG  | GATGGTTTGC  | GACCGTCACG  | CCGATTCTCT  |
| 5821 | TGTGATGATCA | TGGTTACTCA | CCACTGCGAT  | CCCCGGGAAA  | ACAGCATTTCC | AGGTATTAGA  | 9061  | GGGCTTGGGG  | GTTCCAGTGC  | CATTGACAGG  | CCGCGACAGA  | ACCCAGCCGC  | TTACGCTTGG  |
| 5881 | AGAATATCTC  | GATTACGGTG | AAAAATTATG  | TGATGCGCTG  | CGAGTGTGCC  | TGCGCCGGTT  | 9121  | CCAACGCCCC  | CTGCTCCAC   | ACATGGGGCA  | TTCACGCGCG  | TCGGTGCTGT  | GTGTGTTCTG  |
| 5941 | GCATTCGATT  | CCTGTTTGTA | ATTGTCCTTT  | TAACAGCGAT  | CGCGTATTTC  | GTCTCGCTCA  | 9181  | ATTTTCCATG  | CGCCCTCCTT  | TAGCCGCTAA  | AATTATCTA   | CTCATTTTAT  | CATTGCTCTA  |
| 6001 | GGCGCAATCA  | CGAATGAATA | ACGGTTTGGT  | TGATGCGATG  | GATTTTGTAT  | ACGAGCGTAA  | 9241  | TTTACTCTGG  | TAGCTGCGCG  | ATGTATTAG   | ATAGCAGCTC  | GGTAATGGTC  | TTGCCCTTGG  |
| 6061 | TGGCTGGCCT  | GTTGAACAAG | TCTGGAAGAA  | AATGCATAAA  | CTTTTGCCAT  | TCTCACCCTG  | 9301  | GTACCGCGTA  | CATCTTCACG  | TTGGTGTGAT  | CCTCGCCGCG  | CAACTGAAAG  | TTGACCCGCT  |
| 6121 | TTCACTGCTC  | ACTCATGGTG | ATTTCTCACT  | TGATAACCTT  | ATTTTGTACG  | AGGGGAAATG  | 9361  | TCATGCTGCG  | CGTGTCTGCC  | AGGCTGGCCA  | ACGTTGACAG  | CTTGCTGCTG  | CGTGCCTGCG  |
| 6181 | AATAGGTTGT  | ATTGATGTTG | GACGAGTCGG  | AATCGCAGAC  | CGATACCAGG  | ATCTTGCCAT  | 9421  | GACGCGCCGG  | ACTTAGCGTG  | TTTGTGCTTT  | TGCTCATTTT  | CTCTTTACCT  | CATTAATCTA  |
| 6241 | CTTATGGAAC  | TAGCTCCGGT | AGTTTTCTCC  | TTCATTACAG  | AAACGGCTTT  | TTCAAAAAAT  | 9481  | AATGAGTTT   | GATTTAATTT  | GATTTGACCT  | CGCCTTGACC  | TCGCGGGCAG  | CGTCCGCTCA  |
| 6301 | TGGTATTGAT  | GGCCTTGATA | TGAATAAAT   | GCAGTTTACG  | TGTAGTCTCG  | ATGAGTTTTT  | 9541  | GGGTTCTGAT  | TCAAGAACGG  | TTGTGCCGCG  | GGCGGCGATG  | CCTGGGTAGC  | TCACGCGCTG  |
| 6361 | CTAAGAATTA  | ATTCATGATC | CTGCATGACC  | AAAATCCCTT  | AACGTGAGTT  | TTGTTTCCAC  | 9601  | CGTGATACGC  | GATCTCAAGAA | TGGGCGAGTC  | GTACCCGCGC  | AGCGCTCGTG  | CAACTCACCC  |
| 6421 | TGAGCGTCA   | ACCCCGTAGA | AAAGATCAAA  | GGATCTTCTT  | GAGATCTCTT  | TTTTCTGCGC  | 9661  | GCCGATGCGC  | GTGCTTTTGA  | TCGCCCCGTA  | CACGACAAAG  | CGCGCTTGTA  | GCCTTCCATC  |
| 6481 | GTAATCTGCT  | GCTTCAAAAC | AAAAAAACAA  | CCGCTTACCAG | CGGTGGTTTG  | TTTGCCGGAT  | 9721  | CGTGACCTCA  | ATGCGCTGCT  | TAACCAAGTC  | CACCAGGTCG  | GCGGTGGCCC  | ATATGTCGTA  |
| 6541 | CAAGAGCTAC  | CAACTCTTTT | TCCGAAGGTA  | ACTGGCTTCA  | GCAGAGCGCA  | GATACCAAAAT | 9781  | AGGGCTTGGC  | TGCAACGGAA  | TACGACGAA   | GTCCGCTGCC  | TTGATCGCGG  | ACACAGCCAA  |
| 6601 | ACTGCTCTTC  | TAGTGATGCC | TAGTTAGGCG  | CACCACTCTG  | AGAACTCTGT  | AGCAGCGCCT  | 9841  | GTCCGCGCCC  | TGGGGCGCTC  | CGTGCATCAC  | TACGAAGTGC  | CGCCGGCCGA  | TGGCTTCCAA  |
| 6661 | ACATAGCTCG  | CTCTGTAACT | CCTGTTTACCA | GTGGCTGCTG  | CCAGTGGCGA  | TAAGTCTGTG  | 9901  | GTCCGCGTCA  | ATCGTCGGGC  | GGTCGATGCC  | GACAACGGTT  | AGCGGTTGAT  | CTTCCCGCAC  |
| 6721 | CTTACCGGGT  | TGGACTCAAG | ACGATAGTTA  | CCGGATAAGG  | CGCAGCGGTC  | GGGCTGAACG  | 9961  | GGCCGCCCAA  | TCGCGGGGAC  | TGCCCTGGGG  | ATCGGAATCG  | ACTAACAGAA  | CATCGGCCCC  |
| 6781 | GGGGGTTCTG  | GCACACAGCC | CAGCTTGAG   | CGAACGACCT  | ACACCGAACT  | GAGATACCTA  | 10021 | GGCGAGTTGC  | AGGGCGCGGG  | CTAGATGGGT  | TGCGATGGTC  | GTCTTGCCCTG | ACCCGCCCTT  |
| 6841 | CAGCGTGAGC  | TATGAGAAAG | CGCCACGCTT  | CCCGAAGGGA  | GAAAGGCGGA  | CAGGTATCCG  | 10081 | CTGGTTAAGT  | ACAGCGATAA  | CCTTCATGCG  | TTCCCTTTGC  | GTATTTGTTT  | ATTTACTCAT  |
| 6901 | GTAAGCGGCA  | GGGTCCGAA  | AGGAGAGCGC  | TTCAGGGGGG  | AAACCGCTTG  |             | 10141 | CGCATCATAT  | ACGACGACG   | CGCATGACGC  | AAGCTGTGTT  | ACTCAAATAC  | ACATCACCTT  |
| 6961 | TATCTTTATA  | GTCCTGTGCG | GTTTCGCCAC  | CTCTGACTTG  | AGCGTCGATT  | TTTGTGATGC  | 10201 | TTTAGACGGC  | GGCGCTCGGT  | TTCTTCAGCG  | GCCAAAGTTG  | CTCGCCAGGC  | CGCCACCTTG  |
| 7021 | CTGTCAGGGG  | GGCGGAGCCT | ATGAAAAAAC  | GCCAGCAACG  | CGGCCCTTTT  | ACGGTTTCTG  | 10261 | GCATCAGACA  | AACCGGCCAG  | GATTTTCATG  | ACGCGCACGG  | TTGAGCAGTG  | CGCGGCGGCG  |
| 7081 | GCCTTTTGGT  | GGCCTTTTGC | TCACATGTTT  | TTTCTGCGCT  | TATCCCTGTA  | TTCTGTGGAT  | 10321 | TCGAACACGT  | ACCCGGCCCG  | GATCATCTCC  | GCCTCGATCT  | CTTCGGTAAT  | GAAAAACGGT  |
| 7141 | AACCGTATTA  | CCGCCCTTGA | GTGAGCTGAT  | ACCGCTCGCC  | GCAGCCGAAC  | GACCGAGCGC  | 10381 | TCGTCCTGCT  | CGTCTGTTGT  | CGGTTTTCAT  | CTTGTTCTCT  | TTGGCGTTTA  | TTCTCGGCGG  |
| 7201 | AGCGAGCTCAG | TGAGCGGAGA | AGCGGAAGAG  | CGCCTGATGC  | GGTATTTTCT  | CCTTAGCAGT  | 10441 | CCGCGAGGCG  | GTCCGGCTCG  | GTCAATGCGT  | CCTGACGGAA  | GGCACGCGCG  | CGCGTGGCCT  |
| 7261 | CTGTGCGGTA  | TTTCAACCGC | CATATGGTGC  | ACTCTCAGTA  | AAATCTGCTG  | TGATGCCGCA  | 10501 | CGGTGGGCGT  | CACCTTCTCG  | CTGCGCTCAA  | GTGCGCGGTA  | CAGGTCGAG   | CGATGCACGC  |
| 7321 | TAGTTAAGCC  | AGTATACACT | CCGCTATCGC  | TACGTGACTG  | GGTCATGGCT  | GCGCCCCGAC  | 10561 | CAAGCAGTGC  | AGCCGCTCTT  | TTACGCTGTC  | GGCCTTCTGT  | GTGATCAGC   | TCCGGGCGCT  |
| 7381 | ACCCGCCAAC  | ACCCGCTGAC | GCGCCCTGAC  | GGGCTTGTCT  | GCTCCCGGCA  | TCCGCTTACA  | 10621 | GCGCGATCTG  | TGCGCGGGTG  | AGGGTAGGGC  | GGGGGCCAAA  | CTTACGCTGT  | CGCGCTTTGG  |
| 7441 | GACAAGCTGT  | GACCGTCTGC | GGGAGCTGGA  | TGTGTACAGG  | GTTTTCACCG  | TCATCACCAG  | 10681 | CGGCCCTCGG  | CCCGCTCCGG  | GTGCGGTGCA  | TGATTAGGGA  | ACGCTCGAAC  | TCCGCAATGC  |
| 7501 | AACCGCGGAG  | GACGGGTGCC | TTGATGTGGG  | GCGCGGCGGT  | CGAGTGCGCA  | CGATCGCGCT  | 10741 | CGGCGAACAC  | GGTCAACAC   | ATGCGGCGCG  | CCGGCGTGGT  | GGTGTCCGGC  | CACGCGCTCG  |
| 7561 | TGTCGCGGCC  | CTGTGATGAT | GCCTGGCCGT  | AGGCCAGCCA  | TTTTTGAGCG  | GCCAGCGGCC  | 10801 | CGAGGCTACG  | CAGGCGCGCG  | CGCGCTCTCT  | GGATGCTGCT  | GGCAATGTTC  | AGTAGGTGCG  |
| 7621 | GCGTATAGCC  | GACCGCAAGC | GGCGGGGCGT  | AGGGAGCGCA  | GCGACCGAAG  | GGTAGGCGCT  | 10861 | GGGTGCTGCG  | GGCCAGGCGG  | TCTAGCCTGG  | TCATGTCTAC  | AACGTCGCCA  | GGGCGTAGGT  |
| 7681 | TTTTTGCAGC  | CTTCGGCTGT | GCGCTGGCCA  | GCGAGCGGAG  | CACAGCGGAG  | TTTCTGGTTTA | 10921 | GGTCAAGCAT  | CCTGGCCACG  | TCCGGGCGGT  | CGCGCCTGGT  | GCCGGTGATC  | TTCTCGGAAA  |
| 7741 | AGAGTTTTTA  | TAAAGTTTTA | AGAGTTTTAG  | GCGGAAAAAT  | CGCCTTTTTT  | CTCTTTTATA  | 10981 | ACAGCTTTGT  | GACGCGCGCG  | CGCGTGCAGT  | GTCGCTGAGT  | GTGTGTCAAG  | TCCTGGTCAAG |
| 7801 | TCAGTCACTT  | ACATGTGTGA | CCGGTTCCCA  | ATGTACGGCT  | TTGGGTTCCC  | AATGTACGGG  | 11041 | CGGTGCTGAC  | GCGGGCATAG  | CCCAGCAGGC  | CAGCGGCGGC  | GCTCTGTGTC  | ATGGCGTAAT  |
| 7861 | TTCCGGTTTC  | CAATGTACGG | CTTTGGGTTT  | CCAATGTACG  | TGGCTATCCAC | AGGAAAGAGA  | 11101 | GTCCTCGGTT  | TGATGTCGAA  | GTATTCTACT  | TTATGCGACT  | AAAAACACGC  | ACAAGAAAAA  |
| 7921 | CCTTTTTCGAC | CTTTTTCGCC | TGCTAGGGCA  | ATTTGCCCTA  | GCATCTGCTC  | CGTACATTAG  | 11161 | GCCAGGAAAA  | GAGGAGGGCG  | GCAGCCTGTG  | CGCTAAGCTA  | GGACTTTGTC  | GACATGTGCT  |
| 7981 | GAACCGGCGG  | ATGCTTCGCC | CTCGATCAGG  | TTGCGGTAGC  | GCATGACTAG  | GATCGGGCCA  | 11221 | TTTCAGAAGA  | CGGCTGCACT  | GAACGTCAGA  | AGCCGACTGC  | ACTATAGCAG  | CGGAGGGGTT  |
|      |             |            |             |             |             |             | 11281 | GGATCAAAAGT | ACT         |             |             |             |             |

**Supplemental Figure S3.** F-SHMT08cΔ+Y59A-CDS, insert size, vector, restriction enzymes, and sequenced positive clones used for cloning.

**Gene Name** F-SHMT08cΔ+L129A-CDS

**Cloning Vector** pG2RNAi2

**Length (bp)** 1430

**Cloning Sites** Ascl-AvrII

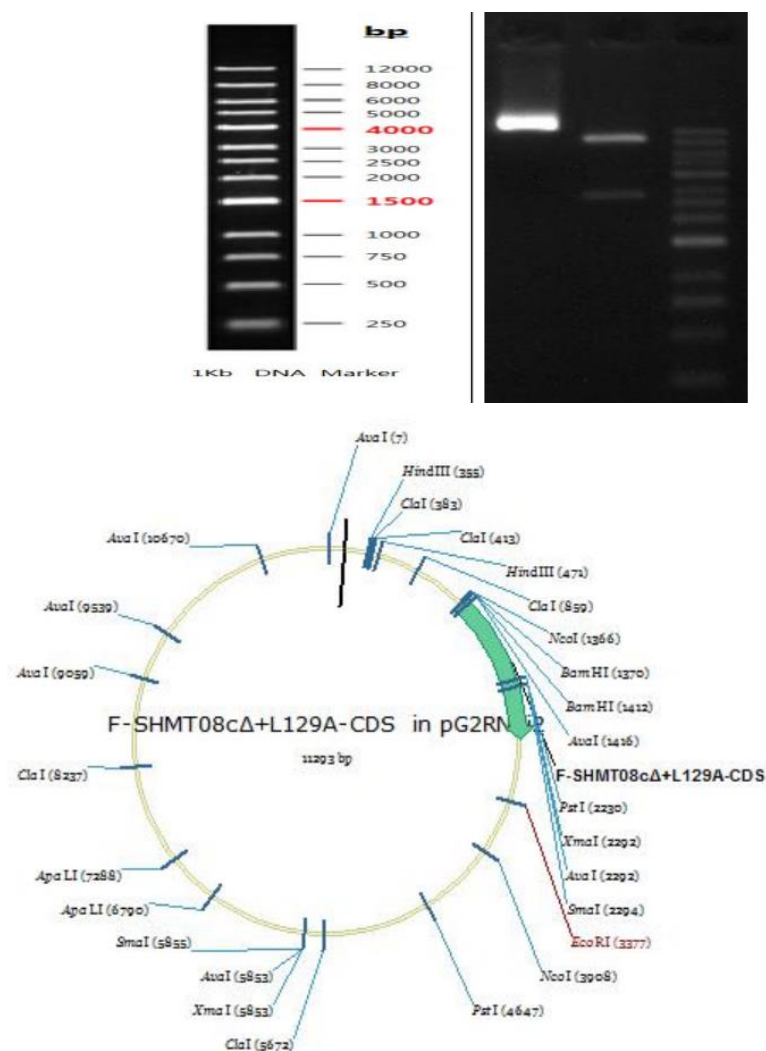

**Supplemental Figure S4.** F-SHMT08cΔ+L129A-CDS, insert size, vector, restriction enzymes, and sequenced positive clones used for cloning.

## Detailed Sequence of the Whole Construct:

```

1  TTGATCCCGA GGGGAACCCCT GTGGTTGGCA TGCACATACA AATGGACGAA CGGATAAACC
61  TTTTCACGCC CTTTTAAATA TCCGTTATTC TAATAAACGC TCTTTTCTCT TAGGTTTACC
121 CGCCAATATA TCCTGTCAAA CACTGATAGT TTAAACTGAA GCGGGGAAAC GACAATCTGA
181 TCCAAGCTCA AGCTCATTCG CCATTGAGGC TGCGCAACTG TTGGGAAGGG CGATCGGTGC
241 GGGCCTCTTC GCTATTACGC CAGCTGGCGA AAGGGGGATG TGCTGCAAGG CGATTAAGTT
301 GGGTAACGCC AGGGTTTTCC CAGTCACGAC GTTGTAAAAC GACGGCCAGT GCCAAGCTTA
361 TTACCCTGTT ATCCCTAGAT ATCGATTTTG GCTACCTTAA GGTAGCCAAA ATCGATCACT
421 AGTGCGGCCG CGGGCCCAAT ATAACAACGA CGTCGTAACA GATAAAGCGA AGCTTGAAGG
481 TGCATGTGAC TCCGTCAAGA TTACGAAACC GCCAACTACC ACGCAAATTG CAATTCTCAA
541 TTTCTAGAA GGACTCTCCG AAAATGCATC CAATACCAA TATTACCCGT GTCATAGGCA
601 CCAAGTGACA CCATACATGA ACACGCGTCA CAATATGACT GGAGAAGGGT TCCACACCTT
661 ATGCTATAAA ACGCCCCACA CCCCTCCTCC TTCCTTCGCA GTTCAATTCC AATATATTCC
721 ATTCTCTCTG TGTATTTCCC TACCTCTCCC TTCAAGGTTA GTCGATTTCT TCTGTTTTTC
781 TTCTTCGTTT TTTCCATGAA TTGTGTATGT TCTTTGATCA ATACGATGTT GATTTGATTG
841 TGTTTTGTTT GGTTTCATCG ATCTTCAATT TTCATAATCA GATTCAGCTT TTATTATCTT
901 TACAACAACC TCCTTAATTT GATGATTCTT TAATCCTAGA TTTGCTCTAA TTAGAGCTTT
961 TTCATGTCAG ATCCCTTTAC AACAAGCCTT AATTGTTGAT TCATTAATCG TAGATTAGGG
1021 CTTTTTTCAT TGATTACTTC AGATCCGTTA AACGTAACCA TAGATCAGGG CTTTTTCATG
1081 AATTACTTCA GATCCGTTAA ACAACAGCCT TATTTTTTAT ACTTCTGTGG TTTTCAAGA
1141 AATTGTTTCA ATCCGTTGAC AAAAAGCCTT ATTCGTTGAT TCTATATCGT TTTTCGAGAG
1201 ATATTGCTCA GATCTGTTAG CAACTGCCTT GTTTGTTGAT TCTATTGCCG TGGATTAGGG
1261 TTTTTTTTCA CGAGATTGCT TCAGATCCGT ACTTAAGATT ACGTAATGGA TTTTGATTCT
1321 GATTTATCTG TGATTGTTGA CTCGACAGCG GCCGCACCGG CGCGCCATGG ATCCAGTAAG
1381 CGTGTGGGGT AACACGCCCT TGGCGACGGT GGATCCCAGG ATCCATGACC TCATCGAGAA
1441 GGAGAAGCGC CGTCAATGCC GCGGAATCGA GTCATCGCC TCCGAGAACT TCACCTCCTT

```

|      |            |            |            |            |            |             |
|------|------------|------------|------------|------------|------------|-------------|
| 1501 | CGCCGTCATC | GAGGCCCTCG | GCAGCCCTCT | CACGAACAAA | TACTCCGAGG | GCATGCCGGG  |
| 1561 | CAACCGCTAC | TACGGCGGCA | ATGAATACAT | CGACCAGATC | GAAAACCTCT | GCCGCTCACG  |
| 1621 | CGCCCTCCAA | GCCTTCCACC | TCGACGCCCA | ATCCTGGGGC | GTCAACGTCC | AGCCCTACTC  |
| 1681 | CGGCTCCCCG | GCCAACTTCG | CCGCCTACAC | CGCCGTCTCT | AACCCCCACG | ACCGCATCAT  |
| 1741 | GGGGCTAGAT | GCTCGCTCCG | GCGGCCACCT | CACCCACGGC | TACTACACCT | CCGGCGGAAA  |
| 1801 | GAAGATCTCC | GCCACCTCCA | TTTACTTCGA | GAGTCTCCCT | TACAAGGTAA | ACTCCACCAC  |
| 1861 | CGGCTACATC | GACTACGACC | GCTTGGAAGA | AAAAGCCCTA | GACTTCAGGC | CAAAACTCAT  |
| 1921 | AATCTGCGGT | GGCAGCGCGT | ACCCTCGCGA | TTGGGACTAC | AAACGTTTCA | GGGAAGTCGC  |
| 1981 | TGATAAGTGC | GGAGCATTGC | TTCTCTGCGA | CATGGCGCAC | ACTAGCGGCC | TTGTGGCCGC  |
| 2041 | GCAGGAAGTG | AACAGCCCTT | TCGAGTATTG | CGACATTGTG | ACCACCACGA | CTCACAAAGAG |
| 2101 | CTTGCGGGGG | CCACGTGCGG | GGATGATCTT | TTACCGGAAG | GGCCCCAAGC | CGCCGAAGAA  |
| 2161 | GGGGCAGCCG | GAGAACGCGG | TTTATGATTT | CGAGGACAAG | ATTAACCTCG | CGGTGTTCCC  |
| 2221 | TTGCTGTCAG | GGTGGGCCCC | ACAACCACCA | GATCGGTGCT | CTCGCCGTGG | CGCTGAAGCA  |
| 2281 | GGCCGCGTCG | CCCGGGTTTA | AGGCCTACGC | GAAGCAGGTT | AAGGCGAACG | CCGTTGCGCT  |
| 2341 | TGGAAAATAC | TTGATGGGGA | AAGGGTACAG | CCTTGTCACT | GGCGGAACGG | AGAACCATCT  |
| 2401 | TGTTTTGTGG | GATCTGAGAC | CTCTTGGATT | GACTGGGTAT | AAGGTGGAGA | AACTCTGTGA  |
| 2461 | TCTCTGTAAC | ATTACTGTTA | ACAAGAACGC | TGTTTTTGGT | GATAGCAGTG | CCTTGGCCCC  |
| 2521 | TGGTGGAGTG | CGAATTGGTG | CCCTTGCCAT | GACTTCTAGG | GGTTTGGTTG | AAAAAGACTT  |
| 2581 | TGAGCAGATT | GGTGAGTTC  | TTCAACGTGC | TGTGACTCTC | AACTGGAGA  | TCCAGAAGGA  |
| 2641 | GCATGGCAAA | CTTCTCAAGG | ATTTCAACAA | GGGTCTCGTC | AACAACAAGG | CTATTGAAGA  |
| 2701 | TCTCAAAGCT | GATGTTGAGA | AGTTCTCTGC | CTGTTTGAC  | ATGCCTGGCT | TCCTGGTATC  |
| 2761 | TGAAATGAAG | TACAAGGATT | AGCCTAGGTT | CGAGTATTAT | GGCATTGGGA | AAACTGTTTT  |
| 2821 | TCTTGTAACA | TTTGTGTGTC | TTGTAATTTA | CTGTGTTTTT | TATTCGTTT  | TCGCTATCGA  |
| 2881 | ACTGTGAAAT | GGAAATGGAT | GGAGAAGAGT | TAATGAATGA | TATGGTCCTT | TTGTTTCATTC |
| 2941 | TCAAATTAAT | ATTATTTGTT | TTTTCTCTTA | TTGTTGTGT  | GTGAATTG   | AAATTATAAG  |
| 3001 | AGATATGCAA | ACATTTTGTT | TTGAGTAAAA | ATGTGTCAAA | TCGTGGCCTC | TAATGACCGA  |
| 3061 | AGTTAATATG | AGGAGTAAAA | CACTTGTAGT | TGTACCATTA | TGCTTATCA  | CTAGGCAACA  |
| 3121 | AATATATTTT | CAGACCTAGA | AAAGCTGCAA | ATGTTACTGA | ATACAAGTAT | GTCTCTTGT   |
| 3181 | GTTTTAGACA | TTTATGAACT | TTCTTTTATG | TAATTTTCCA | GAATCCTTGT | CAGATTCTAA  |
| 3241 | TCATTGCTTT | ATAATTATAG | TTATACTCAT | GGATTTGTAG | TTGAGTATGA | AAATATTTTT  |
| 3301 | TAATGCATTT | TATGACTTGC | CAATTGATTG | ACAACATGCA | TCAATCCGCG | GTTATGACTC  |
| 3361 | TCTTAAGAGA | GTCATGAATT | CGAGCTTCCA | GAAGGTAATT | ATCCAAGATG | TAGCATCAAG  |
| 3421 | AATCCAATGT | TTACGGGAAA | AACATATGGA | GTATTATGTG | AGCTCAGCAA | GAAGCAGATC  |
| 3481 | AATATGCGGC | ACATATGCAA | CCTATGTTC  | AAAATGAAGA | ATGTACAGAT | ACAAGATCCT  |
| 3541 | ATACTGCCAG | AATACGAAGA | AGAATACGTA | GAAATTGAAA | AAGAAGAACC | AGGCGAAGAA  |
| 3601 | AAGAATCTTG | AAGACGTAAG | CACTGACGAC | AACAATGAAA | AGAAGAAGAT | AAGGTCGGTG  |
| 3661 | ATTGTGAAAG | AGACATAGAG | GACACATGTA | AGGTGGAAAA | TGTAAGGGCG | GAAAGTAACC  |
| 3721 | TTATCACAAA | GGAATCTTAT | CCCCACTAC  | TTATCCTTTT | ATATTTTTC  | GTGTCATTTT  |
| 3781 | TGCCCTTGAG | TTTTCCTATA | TAAGGAACCA | AGTTCGGCAT | TTGTGAAAAC | AAGAAAAAAT  |
| 3841 | TTGGTGTAAG | CTATTTTCTT | TGAAGTACTG | AGGATACAAC | TTCAGAGAAA | TTTGTAAGTT  |
| 3901 | TGTGATCCAT | GGTGAGCAAG | GGCGAGGAGC | TGTTACCCGG | GGTGGTGCCC | ATCCTGGTCG  |
| 3961 | AGCTGGACGG | CGACGTAAAC | GGCCACAAGT | TCAGCGTGTC | CGGCGAGGGC | GAGGGCGATG  |
| 4021 | CCACCTACGG | CAAGCTGACC | CTGAAGTTCA | TCTGCACCAC | CGGCAAGCTG | CCCGTGCCCT  |
| 4081 | GGCCACCCTT | CGTGACCACC | TTCACCTACG | GCGTGCAGTG | CTTCAGCCGC | TACCCCGACC  |
| 4141 | ACATGAAGCA | GCACGACTTC | TTCAAGTCCG | CCATGCCCGA | AGGCTACGTC | CAGGAGCGCA  |
| 4201 | CCATCTTCTT | CAAGGACGAC | GGCAACTACA | AGACCCGCGC | CGAGGTGAAG | TTCGAGGGCG  |
| 4261 | ACACCTTGGT | GAACCGCATC | GAGCTGAAGG | GCATCGACTT | CAAGGAGGAC | GGCAACATCC  |
| 4321 | TGGGGCACAA | GCTGGAGTAC | AACTACAACA | GCCACAACGT | CTATATCATG | GCCGACAAGC  |
| 4381 | AGAAGAACGG | CATCAAGGTG | AACTTCAAGA | TCCGCCACAA | CATCGAGGAC | GGCAGCGTGC  |
| 4441 | AGCTCGCCGA | CCACTACCAG | CAGAACACCC | CCATCGGCGA | CGGCCCCGTG | CTGCTGCCCG  |
| 4501 | ACAACCACTA | CCTGAGCACC | CAGTCCGCCC | TGAGCAAAGA | CCCCAACGAG | AAGCGCGATC  |
| 4561 | ACATGGTCCT | GCTGGAGTTC | GTGACCGCCG | CCGGGATCAC | TCACGGCATG | GACGAGCTGT  |
| 4621 | ACAAGTAAAG | CGGCCGCCCG | GCTGCAGATC | GTTCAAACAT | TTGGCAATAA | AGTTTCTTAA  |
| 4681 | GATTGAATCC | TGTTGCCGGT | CTTGCGATGA | TTATCATATA | ATTTCTGTTG | AATTACGTTA  |

**Supplemental Figure S4.** F-SHMT08cΔ+L129A-CDS, insert size, vector, restriction enzymes, and sequenced positive clones used for cloning.

|      |             |             |             |             |             |             |       |             |             |             |             |             |            |
|------|-------------|-------------|-------------|-------------|-------------|-------------|-------|-------------|-------------|-------------|-------------|-------------|------------|
| 4801 | GAGTCCCAGCA | ATTATACATT  | TAATACGCGA  | TAGAAAACAA  | AATATAGCGC  | GCAAACCTAGG | 8041  | GCCTGCCCGG  | CCTCCTCCTT  | CAAATCGTAC  | TCCGGCAGGT  | CATTTGACCC  | GATCAGCTTG |
| 4861 | ATAAATTATC  | GCGCGCGGTG  | TCATCTATGT  | TACTAGATCT  | GATGATAAGC  | TGTCAAACAT  | 8101  | CGCACGGTGA  | AACAGAACTT  | CTTGAACCTT  | CCGGCGCTGT  | CAGTCCGGTT  | GTAGATCGTG |
| 4921 | GAGAATTAAAT | TCGTAATCAT  | GTCATAGCTG  | TTTCTGTGTG  | GAAATTTGTTA | TCCGCTCACAA | 8161  | TTGAAACAAC  | ATCTGGGCTT  | TGCCTTGCCCT | GCGGCGCGGC  | GTGCCAGGGC  | GTAGAGAAAA |
| 4981 | ATTCCACACA  | ACATACGAGC  | CGGAAGCATA  | AAGTGTAAG   | CCTGGGGTGC  | CTAATGAGTG  | 8221  | CGGCCGATGC  | CGGGATCGAT  | CAAAAAGTAA  | TCCGGGTGAA  | CCGTCAGCAC  | GTCCGGGTTC |
| 5041 | AGCTAACTCA  | CATTAATTTG  | CTGTGCCTCA  | CTGCGCGGCT  | TCCAGTCGGG  | AAACCTGTGCG | 8281  | TTGGCTTCTG  | TGATCTCCGG  | GTACATCCAA  | TACAGTAGCT  | CGATCTCGAT  | GTACTCCGGC |
| 5101 | TGCCAGCTGC  | ATTAATAGAT  | GCGCCACGCG  | CGCGGAGAG   | CGGGTTTGGG  | TATTGGCTAG  | 8341  | CGCGGGTGTG  | GCCTCTTTAC  | GATTCTGTAG  | CGGCTTAATCA | AGGCTTCCAC  | CTCGGATACC |
| 5161 | AGCAATTCCG  | CGTTAATTCA  | GTACATTAATA | AACGTCGCGA  | ATGTGTTATT  | AAGTTGTCTA  | 8401  | GTCACCAAGC  | GGCCGTTCTT  | GGCCTTCTTC  | GTACGCTGCA  | TGGCAACGTG  | CGTGGTGTTC |
| 5221 | AGCGTCAATT  | TGTTTACACC  | ACAATATATC  | CTGCCACGAG  | CCAGCCAAACA | GCTCCCCGAC  | 8461  | AACCGAATGC  | AGGTTTCTAC  | CAGGTCGTCT  | TTCTGCTTTC  | CGCCATCGGC  | TCCGCGCGCT |
| 5281 | CGGCAGCTCG  | GCACAAAATC  | ACCACTCGAT  | ACAGGCAGCC  | CATCAGTCGG  | GGACGGCGTC  | 8521  | AACCTTAGTA  | GTGCGCAAC   | GTGTGGACGG  | AACACGCGGC  | CGGGCTTGTC  | TCCGCTCCAG |
| 5341 | AGCGGAGAG   | CCGTTGTAA   | GCGGCAGACT  | TTGCTCATGT  | TACCGATGCT  | ATTTCGGAAGA | 8581  | TCCCGGTATC  | GGTTCATGGA  | TTCGGTTAGA  | TGGGAAACCG  | CCATCAGTAC  | CAGGTCTGTA |
| 5401 | ACGGCAACTA  | AGCTGCCGGG  | TTTGAACAC   | GGATGATCTC  | GCGGAGGGTA  | GCATGTTGAT  | 8641  | TCCCAACAC   | TGCCATGCC   | GGCCGGCCCT  | GCGGAAACCT  | CTACGTGCCC  | GTCTGGAAGC |
| 5461 | TGTAACGATG  | ACAGAGCGTT  | GCTGCCTGTG  | ATCCAGATCA  | TGAACAATAA  | AACGTGCTCG  | 8701  | TCGTAGCGGA  | TACCTCGCC   | AGCTCGTCGG  | TCACGCTTCG  | ACAGACGGAA  | AACGCCACAG |
| 5521 | TTACATAAAC  | AGTAATACAA  | GGGGTGTTAT  | GAGCCATATT  | CAACGGGAAA  | CGTCTTGCTC  | 8761  | TCCATGATGC  | TGCGACTATC  | GCGGGTGCCC  | ACGTGATAGA  | GCATCGGAAC  | GAAAAAATCT |
| 5581 | TAGCCCGCGA  | TTAAATTCCA  | ACATGGATGC  | TGATTATAT   | GGGTATAAAT  | GGGCTCGCGA  | 8821  | GGTTGCTCGT  | CGCCCTTGCG  | CGGCTTCCTA  | ATCGACGCGC  | CACCGCGGCT  | CGGCGGTTGC |
| 5641 | TAATGTCCGG  | CAATCAGGTG  | CGACAATCTA  | TCGATTGTAT  | GGGAAGCCCG  | ATGCGCCAGA  | 8881  | CGGGATCTCT  | TGCGGATTCG  | ATCAGCGCGC  | GCTTGCCACG  | ATTCACCTGG  | CGGTGCTTCT |
| 5701 | TTGTTTCTTG  | AAACATGGCA  | AGAGTAGCGT  | TGCCAATGAT  | TTTACAGATG  | AGATGGCTCAG | 8941  | GCTTCGATGC  | TTTCCGCTGT  | GCGGCGCTGC  | GCGGCGCTTCA | ACTTCTCCAC  | CAGGTCATCA |
| 5761 | ACTAAACTGG  | CTGACGGAAT  | TTATGCTCTC  | TCCGACCATC  | AAGCATTTTA  | TCCGTACTCC  | 9001  | CCCAGCGCGC  | CGCCGATTTG  | TACCGGGCGC  | GATGGTTTGC  | GACCGTCACG  | CCGATTCTCT |
| 5821 | TGTGATGATCA | TGGTTACTCA  | CCACTGCGAT  | CCCCGGGAAA  | ACAGCATTTCC | AGGTATTAGA  | 9061  | GGGCTTGGGG  | GTTCAGTGC   | CATTGACAGG  | CCGCGACAGC  | ACCCAGCCGC  | TTACGCTTGG |
| 5881 | AGAATATCTC  | GATTACGGTG  | AAAAATTGTT  | TGATGCGCTG  | CGAGTGTGCC  | TGCGCGGTTG  | 9121  | CCAACGCGCC  | CTGCTCCAC   | ACATGGGGCA  | TTCCACGCGC  | TCGGTGCCGT  | GTGTGTTCTG |
| 5941 | GCATTCGATT  | CCTGTTTGTA  | ATTGTCTCTT  | TAACAGCGAT  | CGCGTATTTC  | GTCTCGCTCA  | 9181  | ATTTTCCATG  | CGCCCTCCTT  | TAGCCGCTAA  | AATTATCTA   | CTCATTTTAT  | CATTGCTCTA |
| 6001 | GGCGCAATCA  | CGAATGAATA  | ACGGTTTGGT  | TGATGCGATG  | GATTTTGTAT  | ACGAGCGTAA  | 9241  | TTTACTCTGG  | TAGCTGCGCG  | ATGTATTGAT  | ATAGCAGCTC  | GGTAATGGTG  | TTGCCCTTGG |
| 6061 | TGGCTGGCCT  | GTTGAACAAG  | TCTGGAAGAA  | AATGCATAAA  | CTTTTGCCAT  | TCTCACCCTG  | 9301  | GTACCGCGTA  | CATCTTCACG  | TTGGTGTGAT  | CCTCGCCGCG  | CAACTGAAAG  | TTGACCCGCT |
| 6121 | TTCACTGCTC  | ACTCAGTGAT  | ATTTCTCAGT  | TGATAACCTT  | ATTTTGTGACG | AGGGGAAATG  | 9361  | TCATGCTGCG  | CGTGTCTGCC  | AGGCTGGCCA  | ACGTTGACAG  | CTTGCTGCTG  | CGTGCCTGCG |
| 6181 | AATAGGTTGT  | ATTGATGTTG  | GACGAGTCGG  | AATCGCAGAC  | CGATACCAGG  | ATCTTGCCAT  | 9421  | GACGCGCGCG  | ACTTAGCGTG  | TTTGTGCTTT  | TGCTCATTTT  | CTCTTTTACCT | CATTAATCTA |
| 6241 | CCTATGGAAC  | TGCTCCGGTG  | AGTTTTCTCC  | TTCATTACAG  | AAACGGCTTT  | TTCAAAAAAT  | 9481  | AATGAGTTTT  | GATTTAATTT  | GATTTGACCT  | CGCCTTGACC  | TCGCGGGCAG  | CGTCCGCTCA |
| 6301 | TGGTATTGAT  | TAATCTGATA  | TGAATAAAT   | GCAGTTTACG  | TGTAGCTGCG  | ATGAGTTTTT  | 9541  | GGGTTCTGAT  | TCAAGAACGG  | TTGTGCCGCG  | GGCGGCGATG  | CCTGGGTAGC  | TCACGCGCTG |
| 6361 | CTAAGAATTA  | ATTCATGATC  | CTGCATGACC  | AAAATCCCTT  | AACGTGAGTT  | TTCGTTCCAC  | 9601  | CGTGATACGC  | GACCTCAAGAA | TGGGCGAGTC  | GTACCCGCGC  | AGCGCCTCGT  | CAACTCCACC |
| 6421 | TGAGCGTCA   | ACCCCGTAGA  | AAAGATCAAA  | GGATCTTCTT  | GAGATCCTTT  | TTTTCTGCGC  | 9661  | GCCGATGCGC  | GTGCTTTTGA  | TCGCGCGCTC  | CGCGCTTGTA  | GCGCTTCCAT  | CGCTTCCATC |
| 6481 | GTAATCTGCT  | GCTTCAAAAC  | AAAAAAACAA  | CCGCTTACCAG | CGGTGGTTTG  | TTTGCCGGAT  | 9721  | CGTGACCTCA  | ATGCGCTGCT  | TAACCAGCTC  | CACCAGGTCG  | GCGGTGGCCC  | ATATGTCGTA |
| 6541 | CAAGAGCTAC  | CAACTCTTTT  | TCCGAAGGTA  | ACTGGCTTCA  | GCAGAGCGCA  | GATACCAAAAT | 9781  | AGGGCTTGGC  | TGACACGGAA  | TACGACGAA   | GTGCGCTGCC  | TTGATCGCGG  | ACACAGCCAA |
| 6601 | ACTGCTCTTC  | TAGTGATGCC  | TAGTTAGGCC  | CACCACTCTG  | AGAATCTGCT  | AGCAGCGCCT  | 9841  | GTCCGCGCCG  | TGGGCGCTCT  | CGTGCATCAC  | TACGAAGTGC  | CGCGCGCGCA  | TGGCTTCCAA |
| 6661 | ACATAGCTCG  | CTCTGCTAAT  | CCTGTTTACCA | GTGGCTGCTG  | CCAGTGGCGA  | TAAGTCTGCT  | 9901  | GTGCGCGTCA  | ATCGTCGGGC  | GGTCGATGCC  | GACAACGGTT  | AGCGGTTGAT  | CTTCCCGCAC |
| 6721 | CTTACCGGGT  | TGGACTCAAG  | ACGATAGTTA  | CCGGATAAGG  | CGCAGCGGTC  | GGGCTGAACG  | 9961  | GGCCGCCCCA  | TCGCGGGGAC  | TGCCCTGGGG  | ATCGGAATCG  | ACTAACAGAA  | CATCGGCCCC |
| 6781 | GGGGGTTCTG  | GCACACAGCC  | CAGCTTGAG   | CGAAGCAGCT  | ACACCGAACT  | GAGATACCTA  | 10021 | GCGGAGTTGC  | AGGGCGCGGG  | CTAGATGGGT  | TGCGATGGTC  | GTCTTGCCCTG | ACCCGCTTTT |
| 6841 | CAGCGTGAGC  | TATGAGAAAG  | CGCCACGCTT  | CCCGAAGGGA  | GAAAGGCGGA  | CAGGTATCCG  | 10081 | CTGGTTAAGT  | ACAGCGATAA  | CCTTCATGCG  | TTCCCTTTGC  | GTATTTGTTT  | ATTTACTCAT |
| 6901 | GTAAGCGGCA  | GGGTCGGAA   | AGGAGAGCGC  | TCCAGGGGGG  | AAACCGCTGG  |             | 10141 | CGCATCATAT  | ACGACGACG   | CGCATGACGC  | AAGCTGTTTT  | ACTCAAATAC  | ACATCACCTT |
| 6961 | TATCTTTATA  | GTCCTGTGCG  | GTTTCGCCAC  | CTCTGACTTG  | AGCGTCGATG  | TTTGTGATGC  | 10201 | TTTAGACGCG  | GGCGCTCGGT  | TTCTTCAGCG  | GCCAAAGCTT  | CTTGCCAGCG  | CGCCAGCTTG |
| 7021 | TCGTCAGGGG  | GGCGGAGCCT  | ATGGAATAAT  | GCCAGCAACG  | CGGCTCTTTT  | ACGGTTTCTG  | 10261 | GCATCAGACA  | AACCGGCGAG  | GATTTTCATGC | AGCCGCACGG  | CCGAGCAGTG  | CGCGGGCGGC |
| 7081 | GCCTTTTGTG  | GGCCTTTTGT  | TCACATGTTT  | TTTCTCGGCT  | TATCCCTGTA  | TTCTGTGGAT  | 10321 | TCGAACACGT  | ACCCGCGCGC  | GATCATCTCC  | GCCTCGATCT  | CTTCCGGTAT  | GAAAAACGGT |
| 7141 | AACCGTATTA  | CCGCCCTTGA  | GTGAGCTGAT  | ACCGCTCGCC  | GCAGCCGAAC  | GACCGAGCGC  | 10381 | TCGTCCTGGC  | CGTCTCTGTT  | CGGTTTTCAT  | CTTGTTCTCT  | TTGGCGTTTA  | TTCTCGGCGT |
| 7201 | AGCGAGCTAG  | TGAGCGGAGA  | AGCGGAAGAG  | CGCCTGATGC  | GGTATTTTCT  | CCTTACGACT  | 10441 | CCGCGAGGCG  | GTGCGGCTCG  | GTCAATGCGT  | CCTGACGGAA  | GGCAATGTCG  | CGCTGGCGCT |
| 7261 | CTGTGCGGTA  | TTTCAACCGC  | CATATGGTGC  | ACTCTCAGTA  | AAATCTGCTG  | TGATGCCGCA  | 10501 | CGGTGGGCGT  | CACCTTCTCG  | CTGCGCTCAA  | GTGCGCGGTA  | CAGGTCGAG   | CGATGCACGC |
| 7321 | TAGTTAAGCC  | AGTATACACT  | CCGCTATCGC  | TACGTGACTG  | GGTCATGGCT  | GCGCCCCGAC  | 10561 | CAAGCAGTGC  | AGCCGCTCTT  | TTACGCTGTC  | GGCCTTCTGT  | GTGATCAGC   | TCCGCGGCGT |
| 7381 | ACCCGCCAAC  | ACCCGCTGAC  | GCGCCCTGAC  | GGGCTTGTCT  | GCTCCCGGCA  | TCCGCTTACA  | 10621 | GCGCGATCTG  | TGCGCGGGTG  | AGGGTAGGGC  | GGGGGCCAAA  | CTTACGCTCT  | CGGCGCTTGG |
| 7441 | GACAAGCTGT  | GACCGTCTCC  | GGGAGCTGGA  | TGTGTACAGG  | GTTTTCACCG  | TCATCACCAG  | 10681 | CGGCTTCGCG  | CCCGCTCCGG  | GTGCGGTGCA  | TGATTAGGGA  | ACGCTCGAAC  | TCCGCAATGC |
| 7501 | AACGCGCGAG  | GACGGGTGCC  | TTGATGTGGC  | CGCGGCGGCT  | CGATTGCGGA  | CGATCGGCGT  | 10741 | CGGCGAACAC  | GGTCAACAC   | ATGCGCGCGG  | CCGCGCTGGT  | GGTGTCCGGC  | CACGCGCTCT |
| 7561 | TGTCGCGGCC  | CTGTGATGAT  | GCCTGGCGGT  | AGGCCAGCCA  | TTTTTGAGCG  | GCCAGCGGCC  | 10801 | CGAGGCTACG  | CAGCCGCGCG  | CGCGCTCTCT  | CGCGCTGCTG  | GCAATGTCTC  | AGTAGTCTGC |
| 7621 | GCGTATAGCC  | GACCGCAAGC  | GGCGGGGCGT  | AGGGAGCGCA  | GCGACCGAAG  | GGTAGGCGCT  | 10861 | GGGTGCTGCG  | GGCCAGGCGG  | TCTAGCCTGG  | TCATGTCTAC  | AACGTGCGCA  | GGGCGTAGGT |
| 7681 | TTTTTGCAGC  | CTTCGGCTGT  | GCGCTGGCCA  | CACAGCTTATG | CACAGGCGAG  | CGGTTGTTTA  | 10921 | GGTCAAGCAT  | CCTGGCCACG  | TCCGGGCGGT  | CGCGCCTGGT  | GCCGGTGATC  | TTCTCGGAAA |
| 7741 | AGAGTTTTAA  | TAAAGTTTTAA | AGAGTTTTAG  | GCGGAAAAAT  | CGCCTTTTTT  | CTCTTTTATA  | 10981 | AGACAGTTGT  | GACGCGCGCG  | CGCGTGCAGT  | TCGCTGCAAG  | TCTGGTCAAG  | TCTGGTCAAG |
| 7801 | TCAGTCACTT  | ACATGTGTGA  | CCGGTTCCCA  | ATGTACGGCT  | TTGGGTTCCC  | AATGTACGGG  | 11041 | CGGTGCTGAC  | GCGGGCATAG  | CCCAGCAGGC  | CAGCGGCGGC  | GCTCTGTGTC  | ATGGCGTAAT |
| 7861 | TTTCCGGTTC  | CAATGTACGG  | CTTTGGGTTT  | CCAATGTACG  | GCTATTCCAC  | AGGAAAGAGA  | 11101 | GTCTCCGGTT  | TGATGCGCAA  | GTATTCTACT  | TTATGCGACT  | AAAAACACGC  | ACAAGAAAAA |
| 7921 | CCTTTTTCGAC | CTTTTTCGCC  | TGCTAGGGCA  | ATTTGCCCTA  | GCATCTGCTC  | CGTACATTAG  | 11161 | GCCAGGAAAA  | GCGGAGGCGG  | GCAGCTGTGC  | CGCTAAGCTA  | GGACTTGTGC  | GACATGTCGT |
| 7981 | GAACCGGCGG  | ATGCTTCGCC  | CTCGATCAGG  | TTGCGGTAGC  | GCATGACTAG  | GATCGGGCCA  | 11221 | TTTCAGAAGA  | CGGCTGCACT  | GAACGTCAGA  | AGCCGACTGC  | ACTATAGCAG  | CGGAGGGGTT |
|      |             |             |             |             |             |             | 11281 | GGATCAAAAGT | ACT         |             |             |             |            |

**Supplemental Figure S4.** F-SHMT08cΔ+L129A-CDS, insert size, vector, restriction enzymes, and sequenced positive clones used for cloning.

**Gene Name** F-SHMT08cΔ+L135A-CDS

**Cloning Vector** pG2RNAi2

**Length (bp)** 1430

**Cloning Sites** Ascl-AvrII

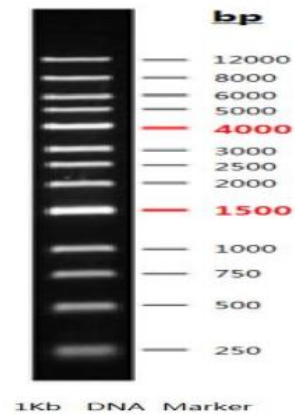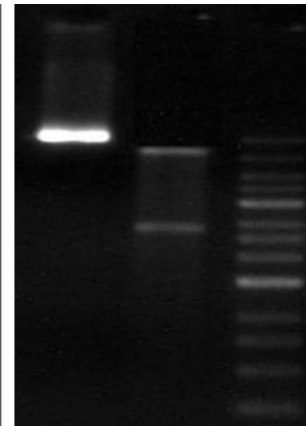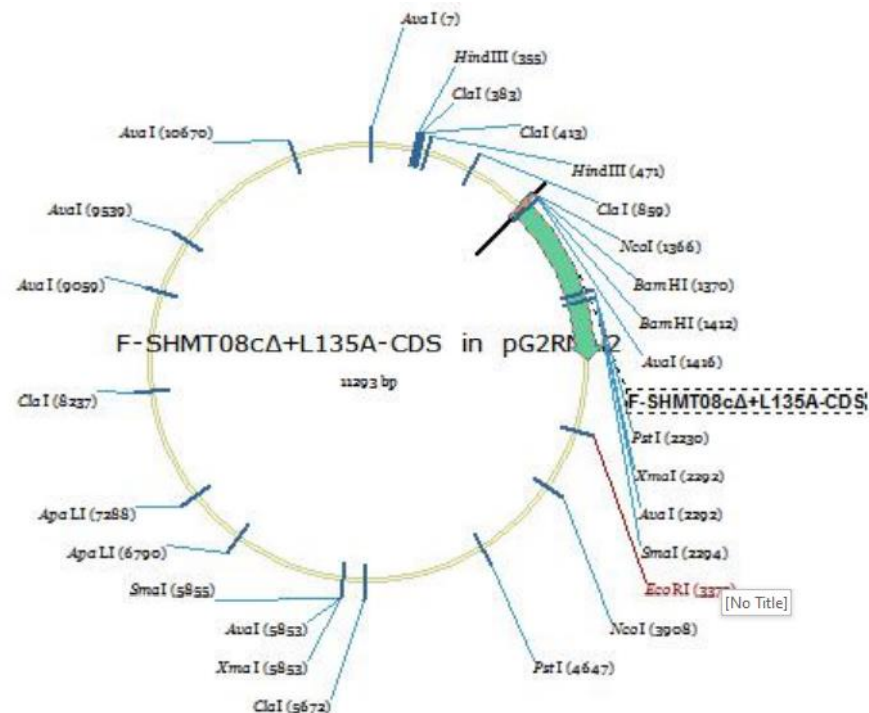

**Supplemental Figure S5.** F-SHMT08cΔ+L135A-CDS, insert size, vector, restriction enzymes, and sequenced positive clones used for cloning.

## Detailed Sequence of the Whole Construct:

```

1  TTGATCCCGA GGGGAACCCT GTGGTTGGCA TGCACATACA AATGGACGAA CGGATAAACC
61  TTTTCACGCC CTTTTAAATA TCCGTTATTC TAATAAACGC TCTTTTCTCT TAGGTTTACC
121 CGCCAATATA TCCTGTCAAA CACTGATAGT TTAAACTGAA GGCGGGAAAC GACAATCTGA
181 TCCAAGCTCA AGCTCATTCG CCATTGAGGC TGCGCAACTG TTGGGAAGGG CGATCGGTGC
241 GGGCCTCTTC GCTATTACGC CAGCTGGCGA AAGGGGGATG TGCTGCAAGG CGATTAAGTT
301 GGGTAACGCC AGGGTTTTTC CAGTCACGAC GTTGTAATAAC GACGGCCAGT GCCAAGCTTA
361 TTACCCTGTT ATCCCTAGAT ATCGATTTTG GCTACCTTAA GGTAGCCAAA ATCGATCACT
421 AGTGCGGCCG CGGGCCCAAT ATAACAACGA CGTCGTAACA GATAAAGCGA AGCTTGAAGG
481 TGCATGTGAC TCCGTCAAGA TTACGAAACC GCCAACTACC ACGCAAATTG CAATTCTCAA
541 TTTCTAGAA GGACTCTCCG AAAATGCATC CAATACCAA TATTACCCGT GTCATAGGCA
601 CCAAGTGACA CCATACATGA ACACGCGTCA CAATATGACT GGAGAAGGGT TCCACACCTT
661 ATGCTATAAA ACGCCCCACA CCCCTCCTCC TTCCTTCGCA GTTCAATTCC AATATATTCC
721 ATTCTCTCTG TGTATTTCCC TACCTCTCCC TTCAAGGTTA GTCGATTTCT TCTGTTTTTC
781 TTCTTCGTTT TTTCCATGAA TTGTGTATGT TCTTTGATCA ATACGATGTT GATTTGATTG
841 TGTTTTGTTT GGTTCATCG ATCTTCAATT TTCATAATCA GATTCAGCTT TTATTATCTT
901 TACAACAACG TCCTTAATTT GATGATTCTT TAATCGTAGA TTTGCTCTAA TTAGAGCTTT
961 TTCATGTCAG ATCCCTTTAC AACAAGCCTT AATTGTTGAT TCATTAATCG TAGATTAGGG
1021 CTTTTTTCAT TGATTACTTC AGATCCGTTA AACGTAACCA TAGATCAGGG CTTTTTCATG
1081 AATTACTTCA GATCCGTTAA ACAACAGCCT TATTTTTTAT ACTTCTGTGG TTTTCAAGA
1141 AATTGTTTCA ATCCGTTGAC AAAAAGCCTT ATTCGTTGAT TCTATATCGT TTTTCGAGAG
1201 ATATTGCTCA GATCTGTTAG CAACTGCCTT GTTTGTTGAT TCTATTGCCG TGGATTAGGG
1261 TTTTTTTTCA CGAGATTGCT TCAGATCCGT ACTTAAGATT ACGTAATGGA TTTTGATTCT
1321 GATTTATCTG TGATTGTTGA CTCGACAGCG GCCGCACCGG CGCGCCATGG ATCCAGTAAG
1381 CGTGTGGGGT AACACGCCCT TGGCGACGGT GGATCCCGAG ATCCATGACC TCATCGAGAA
1441 GGAGAAGCGC CGTCAATGCC GCGGAATCGA GCTCATCGCC TCCGAGAACT TCACCTCCTT
1501 CGCCGTCATC GAGGCCCTCG GCAGCGCTCT CACGAACAAA TACTCCGAGG GCATGCCGGG

```

1561 CAACCGCTAC TACGGCGGCA ATGAATACAT CGACCAGATC GAAACCTCTT GCCGCTCACC  
1621 CGCCCTCCAA GCCTTCCACC TCGACGCCCA ATCCTGGGGC GTCAACGTCC AGCCCTACTC  
1681 CGGCTCCCCG GCCAACTTCG CCGCCTACAC CGCCGTCTCT AACCCCCACG ACCGCATCAT  
1741 GGGGCTAGAT CTCCGCTCCG GCGGCCACGC TACCCACGGC TACTACACCT CCGGCGGAAA  
1801 GAAGATCTCC GCCACCTCCA TTTACTTCGA GAGTCTCCCT TACAAGGTAA ACTCCACCAC  
1861 CGGCTACATC GACTACGACC GCTTGAAGA AAAAGCCCTA GACTTCAGGC CAAAACATCAT  
1921 AATCTGCGGT GGCAGCGCGT ACCCTCGCGA TTGGGACTAC AAACGTTTCA GGAAGTTCGC  
1981 TGATAAGTGC GGAGCATTGC TTCTCTGCGA CATGGCGCAC ACTAGCGGCC TTGTGGCCGC  
2041 GCAGGAAGTG AACAGCCCCC TCGAGTATTG CGACATTGTG ACCACCACGA CTCACAAGAG  
2101 CTGCGGGGCG CCACGTGCGG GGATGATCTT TTACCGGAAG GGCCCCAAGC CGCCGAAGAA  
2161 GGGGCAGCCG GAGAACGCGG TTTATGATTT CGAGGACAAG ATTAACCTCG CGGTGTTCCT  
2221 TTGCGTGCAG GGTGGGCCCC ACAACCACCA GATCGGTGCT CTCGCCGTGG CGCTGAAGCA  
2281 GGCCGCGTCG CCCGGGTTTA AGGCCCTACGC GAAGCAGGTT AAGGCGAACG CCGTTGCGCT  
2341 TGGAAAATAC TTGATGGGGA AAGGGTACAG CCTTGTCCTT GCGGGAACGG AGAACCATCT  
2401 TGTTTTGTGG GATCTGAGAC CTCTGGGATT GACTGGGTAT AAGGTGGAGA AACTCTGTGA  
2461 TCTCTGTAAC ATTACTGTTA ACAAGAACGC TGTTTTTGGT GATAGCAGTG CCTTGGCCCC  
2521 TGGTGGAGTG CGAATTGGTG CCCCTGCCAT GACTTCTAGG GGTTTGGTTG AAAAAGACTT  
2581 TGAGCAGATT GGTGAGTTCC TTCACCGTGC TGTGACTCTC AACTGGAGA TCCAGAAGGA  
2641 GCATGGCAAA CTTCTCAAGG ATTTCAACAA GGGTCTCGTC AACAACAAGG CTATTGAAGA  
2701 TCTCAAAGCT GATGTTGAGA AGTTCTCTGC CTTGTTTGAC ATGCCTGGCT TCCTGGTATC  
2761 TGAAATGAAG TACAAGGATT AGCCTAGGTT CGAGTATTAT GGCATTGGGA AAACGTGTTT  
2821 TCTGTACCA TTTGTTGTGC TTGTAATTTA CTGTGTTTTT TATTCGGTTT TCGTATCGA  
2881 ACTGTGAAAT GGAAATGGAT GGAGAAGAGT TAATGAATGA TATGGTCCTT TTGTTCATTC  
2941 TCAAATTAAT ATTATTTGTT TTTTCTCTTA TTTGTTGTGT GTTGAATTTG AAATTATAAG  
3001 AGATATGCAA ACATTTTGTT TTGAGTAAAA ATGTGTCAAA TCGTGGCCTC TAATGACCGA  
3061 AGTTAATATG AGGAGTAAAA CACTTGTAAGT TGTACCATTA TGCTTATTCA TAGGCAACA  
3121 AATATATTTT CAGACCTAGA AAAGCTGCAA ATGTTACTGA ATACAAGTAT GTCCTCTTGT  
3181 GTTTTAGACA TTTATGAAC TTCTTTATG TAATTTTCCA GAATCCTTGT CAGATTCTAA  
3241 TCATTGCTTT ATAATTATAG TTATACTCAT GGATTTGTAG TTGAGTATGA AAATATTTTT  
3301 TAATGCATTT TATGACTTGC CAATTGATTG ACAACATGCA TCAATCCGCG GTTATGACTC  
3361 TCTTAAGAGA GTCATGAATT CGAGCTTCCA GAAGGTAATT ATCCAAGATG TAGCATCAAG  
3421 AATCCAATGT TTACGGGAAA AACTATGGAA GTATTATGTG AGCTCAGCAA GAAGCAGATC  
3481 AATATGCGGC ACATATGCAA CCTATGTTCA AAAATGAAGA ATGTACAGAT ACAAGATCCT  
3541 ATACTGCCAG AATACGAAGA AGAATACGTA GAAATTGAAA AAGAAGAACC AGGCGAAGAA  
3601 AAGAATCTTG AAGACGTAAG CACTGACGAC AACAATGAAA AGAAGAAGAT AAGGTCGGTG  
3661 ATTGTAAGAG AGACATAGAG GACACATGTA AGGTGGAAAA TGTAAGGGCG GAAAGTAACC  
3721 TTATCACAAA GGAATCTTAT CCCCCACTAC TTATCCTTTT ATATTTTTCG GTGTCATTTT  
3781 TGCCCTTGAG TTTTCCTATA TAAGGAACCA AGTTCGGCAT TTGTGAAAAC AAGAAAAAAT  
3841 TTGGTGTAAG CTATTTTCTT TGAAGTACTG AGGATACAAC TTCAGAGAAA TTTGTAAGTT  
3901 TGTGATCCAT GGTGAGCAAG GGCGAGGAGC TGTTCAACCG GGTGGTGCCC ATCCTGGTCG  
3961 AGCTGGACGG CGACGTAACG GGCCACAAGT TCAGCGTGTG CGGCGAGGGC GAGGGCGATG  
4021 CCACCTACGG CAAGCTGACC CTGAAGTTCA TCTGCACCAC CGGCAAGCTG CCCGTGCCCT  
4081 GGCCACCTCT CGTGACCACC TTCACCTACG GCGTGCAGTG CTTAGCCGCG TACCCCGACC  
4141 ACATGAAGCA GCACGACTTC TTCAAGTCCG CCATGCCCGA AGGCTACGTC CAGGAGCGCA  
4201 CCATCTTCTT CAAGGACGAC GGCAACTACA AGACCCGCGC CGAGGTGAAG TTCGAGGGCG  
4261 ACACCTGTTT GAACCGCATC GAGCTGAAGG GCATCGACTT CAAGGAGGAC GGCAACATCC  
4321 TGGGGCACAA GCTGGAGTAC AACTACAACA GCCACAACGT CTATATCATG GCCGACAAGC  
4381 AGAAGAACGG CATCAAGGTG AACTTCAAGA TCCGCCACAA CATCGAGGAC GGCAGCGTGC  
4441 AGCTCGCCGA CCACTACCAG CAGAACACCC CCATCGGCGA CGGCCCCGTG CTGCTGCCCG  
4501 ACAACCACTA CCTGAGCACC CAGTCCGCCC TGAGCAAGA CCCCACGAG AAGCGCGATC  
4561 ACATGGTCCT GCTGGAGTTC GTGACCGCCG CCGGGATCAC TCACGGCATG GACGAGCTGT  
4621 ACAAGTAAAG CGGCCGCCCC GCTGCAGATC GTTCAAACAT TTGGCAATAA AGTTTCTTAA  
4681 GATTGAATCC TGTGCGCGGT CTTGCGATGA TTATCATATA ATTTCTGTTG AATTACGTTA  
4741 AGCATGTAAT AATTAACATG TAATGCATGA CGTTATTTAT GAGATGGGTT TTTATGATTA

Supplemental Figure S5. F-SHMT08cΔ+L135A-CDS, insert size, vector, restriction enzymes, and sequenced positive clones used for cloning.

|      |             |            |             |             |             |             |       |             |             |             |             |             |             |
|------|-------------|------------|-------------|-------------|-------------|-------------|-------|-------------|-------------|-------------|-------------|-------------|-------------|
| 4801 | GAGTCCCAGCA | ATTATACATT | TAATACGCGA  | TAGAAAACAA  | AATATAGCGC  | GCAAACCTAGG | 8041  | GCCTGCCCGG  | CCTCCTCCTT  | CAAATCGTAC  | TCCGGCAGGT  | CATTTGACCC  | GATCAGCTTG  |
| 4861 | ATAAATTATC  | GCGCGCGGTG | TCATCTATGT  | TACTAGATCT  | GATGATAAGC  | TGTCAAACAT  | 8101  | CGCACGGTGA  | AACAGAACTT  | CTTGAACCTC  | CCGGCGCTGT  | CAGTCGCGTT  | GTAGATCGTC  |
| 4921 | GAGAATTAAAT | TCGTAATCAT | GTCATAGCTG  | TTTCTCTGTG  | GAAATTTGTTA | TCCGCTCACAA | 8161  | TTGGAACAACC | ATCTGGGCTT  | TGCCTTGCCCT | GCGGCGAGCG  | GTGGCAGGAA  | GTAGAGAAAA  |
| 4981 | ATTCCACACA  | ACATACGAGC | CGGAAGCATA  | AAGTGTAAG   | CCTGGGGTGC  | CTAATGAGTG  | 8221  | CGGCCGATGC  | CGGGATCGAT  | CAAAAAGTAA  | TCCGGGTGAA  | CCGTCAGCAC  | GTCCGGGTTC  |
| 5041 | AGCTAACTCA  | CATTAATTTG | CTGTGCCTCA  | CTGCGCGCTG  | TCCAGTCCGG  | AAACCTGTGTC | 8281  | TTGCGCTCTG  | TGATCTCCGG  | GTACATCCAA  | TACAGTAGCT  | CGATCTCGAT  | GTACTCCGGC  |
| 5101 | TGCCAGCTGC  | ATTAATAGAT | GCGCCACGCA  | GCGGCGGAG   | CGGGTTTGGG  | TATTGGCTAG  | 8341  | GCGCGGGTGT  | GCCTCTTTTC  | GATTCTGTAG  | CGGCTTAATCA | AGGCTTCCAC  | CTCGGATACC  |
| 5161 | AGCAATTCCG  | CGTTAATTCA | GTACATTAATA | AACGTCGCGA  | ATGTGTTATT  | AAGTTGTCTA  | 8401  | GTCACCAGGC  | GGCGCTTCTT  | GGCCTTCTTC  | GTACGCTGCA  | TGGCAACGTG  | CGTGGTGTTC  |
| 5221 | AGCGTCAATT  | TGTTTACACC | ACAATATATC  | CTGCCACCAG  | CCAGCCAAAC  | GCTCCCCGAC  | 8461  | AACCGAATGC  | AGGTTCTTAC  | CAGGTCGTCT  | TTCTGCTTTC  | CGCATCTGGC  | TCCGCGGAGT  |
| 5281 | CGGCAGCTCG  | GCACAAAATC | ACCACTCGAT  | ACAGGCAGCC  | CATCAGTCGC  | GGACGGCGTC  | 8521  | AACCTTAGTA  | GCTCCGCAAC  | GTGTGGACGG  | AACACGCGGC  | CGGGCTTGTC  | TCCGCTCCCT  |
| 5341 | AGCGGGAGAG  | CCGTTGTAA  | GCGGCAGACT  | TTGCTCATGT  | TACCGATGCT  | ATTCCGGAAG  | 8581  | TCCCGGTATC  | GGTTCATGGA  | TTCGGTTAGA  | TGGGAAACCG  | CCATCAGTAC  | CAGGTCGTAA  |
| 5401 | ACGGCAACTA  | AGCTGCCGGG | TTTGAACAC   | GGATGATCTC  | GCGGAGGGTA  | GCATGTTGAT  | 8641  | TCCCAACAC   | TGCCATGCC   | GGCCGGCCCT  | GCGGAAACCT  | CTACGTCGCC  | GTCTGGAAGC  |
| 5461 | TGTAACGATG  | ACAGAGCGTT | GCTGCCTGTG  | ATCCAGATCA  | TGAACAATAA  | AACCTGCTCG  | 8701  | TCGTAGCGGA  | TACCTCGCC   | AGCTCGTCGG  | TCACGCTTCG  | ACAGACGGAA  | AACGCCACAG  |
| 5521 | TTACATAAAC  | AGTAATACAA | GGGGTGTTAT  | GAGCCATATT  | CAACGGGAAA  | CGTCTTGCTC  | 8761  | TCCATGATGC  | TGCGACTATC  | GCGGGTGCCC  | ACGTCATAGA  | GCATCGGAAC  | GAAAAAATCT  |
| 5581 | TAGCCCGCGA  | TTAAATTCCA | ACATGGATGC  | TGATTATAT   | GGGTATAAAT  | GGGCTCGCGA  | 8821  | GGTTGCTCGT  | CGCCCTTGCG  | CGGCTTCCTA  | ATCGACGCGC  | CACCGCGTGC  | CGGCGGTTGC  |
| 5641 | TAAATGTCGG  | CAATCAGGTG | CGACAATCTA  | TCGATTGTAT  | GGGAAGCCCG  | ATGCGCCAGA  | 8881  | CGGGATCTCT  | TGCGGATTCG  | ATCAGCGCGC  | GCTTGCCACG  | ATTCACCTGG  | CGGTGCTTCT  |
| 5701 | TTGTTTCTTG  | AAACATGCGA | AGAGTAGCGT  | TGCCAATGAT  | TTTACAGATG  | AGATGGTTCAG | 8941  | GCTCTGATGC  | TTGTCGCTGT  | GCGGCGCTGC  | GCGGCGCTTCA | ACTTCTCCAC  | CAGGTCATCA  |
| 5761 | ACTAAACTGG  | CTGACGGAAT | TTATGCTCTC  | TCCGACCATC  | AAGCATTTTA  | TCCGTACTCC  | 9001  | CCCAGCGCGC  | CGCCGATTTG  | TACCGGGCGC  | GATGGTTTGC  | GACCGTCACG  | CCGATTCTCT  |
| 5821 | TGATGATGCA  | TGGTTACTCA | CCACTGCGAT  | CCCCGGGAAA  | ACAGCATTTCC | AGGTATTAGA  | 9061  | GGGCTTGGGG  | GTTCAGTGTC  | CATTGACAGG  | CCGCGACAGA  | ACCCAGCCGC  | TTACGCTTGG  |
| 5881 | AGAATATCTC  | GATTACGGTG | AAAATATTGT  | TGATGCGCTG  | CGAGTGTGCC  | TGCGCGGTTG  | 9121  | CCAACGCGCC  | CTCTCTCCAC  | ACATGGGGCA  | TTCACGCGCG  | TCGGTGCCGT  | GTGTGTTCTG  |
| 5941 | GCATTCGATT  | CCTGTTTGTA | ATTGTCCTTT  | TAACAGCGAT  | CGCGTATTTC  | GTCTCGCTCA  | 9181  | ATTTTCCATG  | CGCCCTCCTT  | TAGCCGCTAA  | AATTATCTA   | CTCATTTTAT  | CATTGCTCTA  |
| 6001 | GGCGCAATCA  | CGAATGAATA | ACGGTTTGGT  | TGATGCGATG  | GATTTTGTAT  | ACGAGCGTAA  | 9241  | TTTACTCTGG  | TAGCTGCGCG  | ATGTATTAG   | ATAGCAGCTC  | GGTAATGGTC  | TTGCCCTTGG  |
| 6061 | TGGCTGGCCT  | GTTGAACAAG | TCTGGAAGAA  | AATGCATAAA  | ATTTTGGCAT  | TCTCACCAGG  | 9301  | GTACCGCGTA  | CATCTTTCAG  | TTGGTGTGAT  | CCTCCGCGCG  | CAACTGAAAG  | TTGACCCGCT  |
| 6121 | TTCACTGCTC  | ACTGATCGTG | ATTTCTCACT  | TGATAACCTT  | CTTTTGTACG  | AGGGGAAAT   | 9361  | TCATGCTGCG  | CGTGTCTGCC  | AGGCTGGCCA  | ACGTTGACAG  | CTTGCTGCTG  | CGTGCCTGCG  |
| 6181 | AATAGGTTGT  | ATTGATGTTG | GACGAGTCGG  | AATCGCAGAC  | CGATACCAGG  | ATCTTGCCAT  | 9421  | GACGCGCGCG  | ACTTAGCGTG  | TTTGTGCTTT  | TGCTCATTTT  | CTCTTTTACCT | CATTAATCTA  |
| 6241 | CTTATGGAAC  | TGCCTCGGTG | AGTTTTCTCC  | TTCATTACAG  | AAACGGCTTT  | TTCAAAAAAT  | 9481  | AATGAGTTTT  | GATTTAATTT  | GATTTGATTT  | CAGCGGCGAG  | CTCGGGGAGC  | CGTCCGCTCA  |
| 6301 | TGGTATTGAT  | TATCCTGTGA | TGAATAAAT   | GCAGTTTACG  | TGATGCTGCG  | ATGAGTTTTT  | 9541  | GGGTTCTGAT  | TCAAGAACGG  | TTGTGCCGCG  | GGCGGCGATG  | CCTGGGTAGC  | TCACGCGCTG  |
| 6361 | CTAAGAATTA  | ATTCATGATC | CTGCATGACC  | AAAATCCCTT  | AACGTGAGTT  | TTCGTTCCAC  | 9601  | CGTGATACGC  | GATCTCAAGAA | TGGGCGAGTC  | GTACCCGCGC  | AGCGGCTCGT  | CAACTCACCC  |
| 6421 | TGAGCGTACG  | ACCCCGTAGA | AAAGATCAAA  | GGATCTTCTT  | GAGATCTCTT  | TTTTCTGCGC  | 9661  | GCCGATGCGC  | GTGCTTTTGA  | TCGCGCGGTA  | CACGACAAAG  | GCGGCTTGTA  | GCCTTCCATC  |
| 6481 | GTAATCTGCT  | GCTTCAAAAC | AAAAAAACAA  | CCGCTTACCAG | CGGTGGTTTG  | TTTGCCGGAT  | 9721  | CGTGACCTCA  | ATGCGCTGCT  | TAACAGCTC   | CACCAGGTCG  | GCGGTGGCCC  | ATATGTCGTA  |
| 6541 | CAAGAGCTAC  | CAACTCTTTT | TCCGAAGGTA  | ACTGGCTTCA  | GCAGAGCGCA  | GATACCAAA   | 9781  | AGGGCTTGGC  | TGACACGGAA  | TACGACGAA   | GTGCGCTGCC  | TTGATGCGCG  | ACACAGCCAA  |
| 6601 | ACTGCTCTTC  | TAGTGATGCC | TAGTTAGGC   | CACCACTCTG  | AGAACTCTGT  | AGCAGCGCTC  | 9841  | GTCCGCGGCT  | TGGGCGGCTC  | CGTGCATCAC  | TACGAAGTGC  | GCGCGGCGCA  | TGGCTTCCAC  |
| 6661 | ACATAGCTCG  | CTCTGTAAAT | CCTGTTACCA  | GTGGCTGCTG  | CCAGTGCGCA  | TAAGTCTGTG  | 9901  | GTGCGGTC    | ATCGTCGGGC  | GGTCGATGCC  | GACAACGGTT  | AGCGGTTGAT  | CTTCCGCGAC  |
| 6721 | CTTACCGGGT  | TGGACTCAAG | ACGATAGTTA  | CCGGATAAGG  | CGCAGCGGTC  | GGGCTGAACG  | 9961  | GGCCGCCCCA  | TCGCGGGGAC  | TGCCCTGGGG  | ATCGGAATCG  | ACTAACAGAA  | CATCGGCCCC  |
| 6781 | GGGGGTTCTG  | GCACACAGCC | CAGCTTGAG   | CGAAGCACT   | ACACCGAACT  | GAGATACCTA  | 10021 | GCGGAGTTGC  | AGGGCGCGGG  | CTAGATGGGT  | TGCGATGGTC  | GTCTTGCCCTG | ACCCGCTTTT  |
| 6841 | CAGCGTGAGC  | TATGAGAAAG | CGCCACGCTT  | CCCGAAGGGA  | GAAAGGCGGA  | CAGGTATCCG  | 10081 | CTGGTTAAGT  | ACAGCGATAA  | CCTTCATGCG  | TTCCCTTTGC  | GTATTTGTTT  | ATTTACTCAT  |
| 6901 | GTAAGCGGCA  | GGGTCCGAAC | AGGAGAGCGC  | ACGAGGGAGC  | TTCCAGGGGG  | AAACGCCTGG  | 10141 | CGCATATCAT  | ACGACGACG   | CGCATGACG   | AAGCTGTTT   | ACTCAAAATC  | ACATCACCTT  |
| 6961 | TATCTTTATA  | GTCCTGTGCG | GTTTCGCCAC  | CTCTGACTTG  | AGCGTCGATT  | TTTGTGATGC  | 10201 | TTTAGACGCG  | GCGCTCTCGT  | TTCTTCAGCG  | GCCAAAGCTG  | CCCGCCAGGC  | CGCCAGCTTG  |
| 7021 | CTGTCAGGGG  | GGCGGAGCCT | ATGGAATAAT  | GCCAGCAACG  | CGGCTCTTTT  | ACGGTTTCTG  | 10261 | GCATCAGACA  | AACCGGCGAG  | GATTTTCATG  | AGCCGACAGG  | TTGAGACGTG  | GCGGCGCGGC  |
| 7081 | GCCTTTTGGT  | GGCCTTTTGC | TCACATGTTT  | TTTCTGCGGT  | TATCCCTGTA  | TTCTGTGGAT  | 10321 | TCGAACACGT  | ACCCGCGCGC  | GATCATCTCC  | GCCTCGATCT  | CTTCGGTAA   | GAAAAACGGT  |
| 7141 | AACCGTATTA  | CCGCCCTTGA | GTGAGCTGAT  | ACCGCTCGCC  | GCAGCCGAAC  | GACCGAGCGC  | 10381 | TCGTCCTGGC  | CGTCTGTGTC  | CGGTTTTCAT  | CTTGTTCTCT  | TTGGCGTTTA  | TTCTCGGCGT  |
| 7201 | AGCGAGCTCAG | TGAGCGGAGA | AGCGGAAGAG  | CGCCTGATGC  | GGTATTTTCT  | CCTTACGACT  | 10441 | CCGCGAGGCG  | GTGCGGCTCG  | GTCAATGCGT  | CCTGACGAA   | GGCAGCCGCG  | CGCGTGGCCT  |
| 7261 | CTGTGCGGTA  | TTTACACCG  | CATATGGTGC  | ACTCTCAGTA  | AAATCTGCTG  | TGATGCCGCA  | 10501 | CGGTGGGCGT  | CACCTTCTCG  | CTGCGCTCAA  | GTGCGCGGTA  | CAGGTCGAG   | CGATGCACGC  |
| 7321 | TAGTTAAGCC  | AGTATACACT | CCGCTATCGC  | TACGTGACTG  | GGTCATGGCT  | GCGCCCCGAC  | 10561 | CAAGCAGTGC  | AGCCGCTCTT  | TTACGCTGTC  | GGCCTTCTGT  | GTGATCAGC   | TCCGCGGCGT  |
| 7381 | ACCCGCCAAC  | ACCCGCTGAC | GCGCCCTGAC  | GGGCTTGTCT  | GCTCCCGGCA  | TCCGCTTACA  | 10621 | GCGCGCATCT  | TGCGCGGGTG  | AGGGTAGGGC  | GGGGGCCAAA  | CTTACGCTGT  | CGGCGCTTGG  |
| 7441 | GACAAGCTGT  | GACCGTCTGC | GGGAGCTGAC  | TGTGTCAGAG  | GTTTTCACCG  | TCATCACCAG  | 10681 | CGGCTTCGCG  | CCCGCTCCGG  | GTGCGGTGCA  | TGATTAGGGA  | ACGCTCGAAC  | TCCGCAATGC  |
| 7501 | AACGCGCGAG  | CTGATGTTGG | GCGCGGCGGT  | GAGTGGGCGA  | CGAGTGGCGA  | CGATCGGCGT  | 10741 | CGGCGAACAC  | GGTCAACAC   | ATGCGGCGCG  | CCGCGGTGGT  | GGTGTCCGCG  | CACGCGCTCT  |
| 7561 | TGTCGCGGCC  | CTGTGATATT | GCCTGGCCGT  | AGGCCAGCCA  | TTTTTGAGCG  | GCCAGCGGCC  | 10801 | CAAGGCTACG  | CAGCGGCGCG  | CGGCGCTCCT  | CGGCGCTGCT  | GGCAATGTTC  | AGTAGGTCGC  |
| 7621 | CGCATAGGCT  | GACCGGAAGC | GGCGGGGCGT  | AGGGAGCGCA  | GCGACCGAAG  | GGTAGGCGCT  | 10861 | GGGTGCTGCG  | GGCCAGGCGG  | TCTAGCCTGG  | TCATGTCTAC  | AACGTCGCCA  | GGGCGTAGGT  |
| 7681 | TTTTTGCAGC  | CTTCGGCTGT | GCGCTGGCCA  | CACAGGCGAG  | CATAGGCTTTA | TTCTGCTGAT  | 10921 | GGTCAAGCAT  | CCTGGCCAGC  | TCCGGGCGGT  | CGGCGCTGCT  | GCCGGTGATC  | TTCTCGGAAA  |
| 7741 | AGAGTTTTAA  | TAAAGTTTTA | AGAGTTTTAG  | GCGGAAAAAT  | CGCCTTTTTT  | CTCTTTTATA  | 10981 | ACAGCTTTGT  | GACGCGCGCG  | CGGCTGAGTT  | GTGCTGCAAG  | TCCTGGTCAAG | TCCTGGTCAAG |
| 7801 | TCAGTCACTT  | ACATGTGTGA | CCGGTTCCCA  | ATGTACGGCT  | TTGGGTTCCC  | AATGTACGGG  | 11041 | CGGTGCTGAC  | GCGGCGATAG  | CCCAGCAGGC  | CAGCGGCGGC  | GCTCTGTGTC  | ATGGCGTAAT  |
| 7861 | TTTCCGGTTC  | CAATGTACGG | CTTTGGGTTT  | CCAATGTACG  | TGCTATCCAC  | AGGAAAGAGA  | 11101 | GTCTCCGGTT  | TGATGTCGAA  | GTATTCTACT  | TTATGCGACT  | AAAAACACGC  | ACAAGAAAAA  |
| 7921 | CCTTTTTCGAC | CTTTTTCGCC | TGCTAGGGCA  | ATTTGCCCTA  | GCATCTGCTC  | CGTACATTAG  | 11161 | GCCAGGAAAA  | GCGAGGCGCG  | GCAGCTGTGC  | CGCTAAGTTA  | GGACTTGTGC  | GACATGTCGT  |
| 7981 | GAACCGGCGG  | ATGCTTCCGC | CTCGATCAGG  | TTGCGGTAGC  | GCATGACTAG  | GATCGGGCCA  | 11221 | TTTCAAGAAG  | CGGCTGCACT  | GAACGTCAGA  | AGCCGACTGC  | ACTATAGCAG  | CGGAGGGGTT  |
|      |             |            |             |             |             |             | 11281 | GGATCAAAAG  | ACT         |             |             |             |             |

**Supplemental Figure S5.** F-SHMT08CΔ+L135A-CDS, insert size, vector, restriction enzymes, and sequenced positive clones used for cloning.

**Gene Name** F-SHMT08cΔ+S190A-CDS

**Cloning Vector** pG2RNAi2

**Length (bp)** 1430

**Cloning Sites** Ascl-AvrII

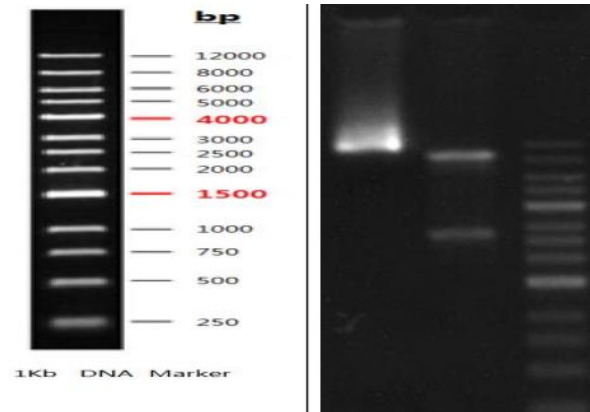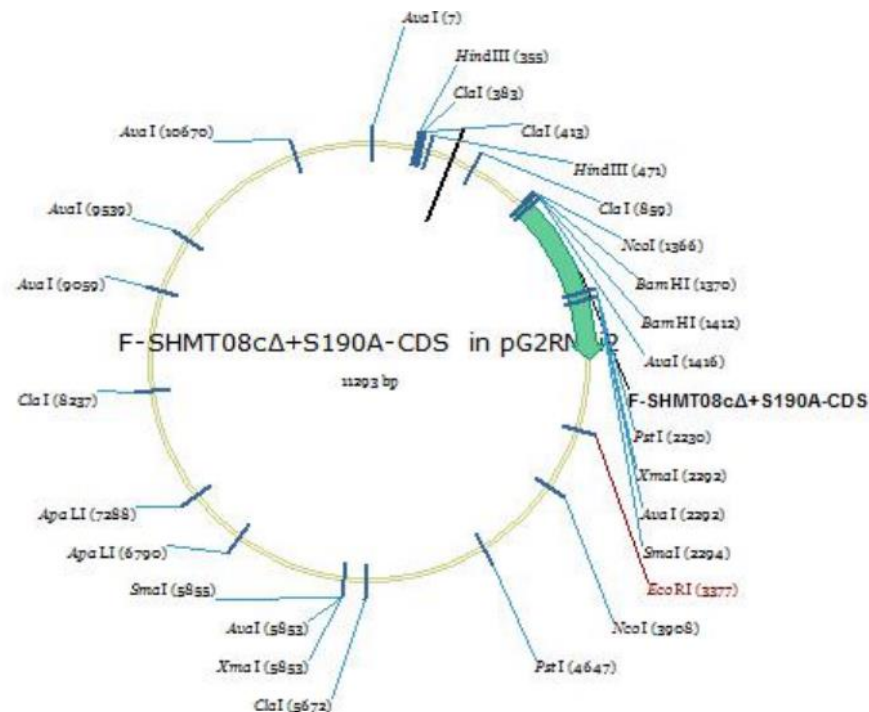

**Supplemental Figure S6.** F-SHMT08cΔ+S190A-CDS, insert size, vector, restriction enzymes, and sequenced positive clones used for cloning.

## Detailed Sequence of the Whole Construct:

```

1  TTGATCCCGA GGGGAACCCT GTGGTTGGCA TGCACATACA AATGGACGAA CGGATAAACC
61  TTTTCACGCC CTTTTAAATA TCCGTTATTC TAATAAACGC TCTTTTCTCT TAGGTTTACC
121 CGCCAATATA TCCTGTCAAA CACTGATAGT TTAAACTGAA GGCGGGAAAC GACAATCTGA
181 TCCAAGCTCA AGCTCATTCG CCATTCAGGC TGCGCAACTG TTGGGAAGGG CGATCGGTGC
241 GGGCCTCTTC GCTATTACGC CAGCTGGCGA AAGGGGGATG TGCTGCAAGG CGATTAAAGT
301 GGGTAACGCC AGGGTTTTCC CAGTCACGAC GTTGTA AAC GACGGCCAGT GCCAAGCTTA
361 TTACCCTGTT ATCCCTAGAT ATCGATTTTG GCTACCTTAA GGTAGCCAAA ATCGATCACT
421 AGTGCGGCCG CGGGCCCAAT ATAACAACGA CGTCGTAACA GATAAAGCGA AGCTTGAAGG
481 TGCATGTGAC TCCGTCAAGA TTACGAAACC GCCAACTACC ACGCAAATTG CAATTCTCAA
541 TTTCTTAGAA GGACTCTCCG AAAATGCATC CAATACCAA TATTACCCGT GTCATAGGCA
601 CCAAGTGACA CCATACATGA ACACGCGTCA CAATATGACT GGAGAAGGGT TCCACACCTT
661 ATGCTATAAA ACGCCCCACA CCCCTCCTCC TTCCTTCGCA GTTCAATTCC AATATATTCC
721 ATTCTCTCTG TGTATTTCCC TACCTCTCCC TTCAAGGTTA GTCGATTTCT TCTGTTTTTC
781 TTCTTCGTTT TTTCCATGAA TTGTGTATGT TCTTTGATCA ATACGATGTT GATTTGATTG
841 TGTTTTGTTT GGTTCATCG ATCTTCAATT TTCATAATCA GATTCAGCTT TTATTATCTT
901 TACAACAACG TCCTTAATTT GATGATTCTT TAATCGTAGA TTTGCTCTAA TTAGAGCTTT
961 TTCATGTCAG ATCCCTTTAC AACAAGCCTT AATTGTTGAT TCATTAATCG TAGATTAGGG
1021 CTTTTTTCAT TGATTACTTC AGATCCGTTA AACGTAACCA TAGATCAGGG CTTTTTCATG
1081 AATTACTTCA GATCCGTTAA ACAACAGCCT TATTTTTTAT ACTTCTGTGG TTTTTC AAGA
1141 AATTGTTTCA ATCCGTTGAC AAAAAGCCTT ATTCGTTGAT TCTATATCGT TTTTCGAGAG
1201 ATATTGCTCA GATCTGTTAG CAACTGCCTT GTTTGTTGAT TCTATTGCCG TGGATTAGGG
1261 TTTTTTTTCA CGAGATTGCT TCAGATCCGT ACTTAAGATT ACGTAATGGA TTTTGATTCT
1321 GATTTATCTG TGATTGTTGA CTCGACAGCG GCCGCACCGG CGCGCCATGG ATCCAGTAAG
1381 CGTGTGGGGT AACACGCCCT TGGCGACGGT GGATCCCGAG ATCCATGACC TCATCGAGAA
1441 GGAGAAGCGC CGTCAATGCC GCGGAATCGA GTCATCGCC TCCGAGAACT TCACCTCCTT

```

|      |             |            |             |            |            |             |
|------|-------------|------------|-------------|------------|------------|-------------|
| 1501 | CGCCGTCATC  | GAGGCCCTCG | GCAGCGCTCT  | CACGAACAAA | TACTCCGAGG | GCATGCCGGG  |
| 1561 | CAACCGCTAC  | TACGGCGGCA | ATGAATACAT  | CGACCAGATC | GAAAACCTCT | GCCGCTCACG  |
| 1621 | CGCCCTCCAA  | GCCTTCCACC | TCGACGCCCA  | ATCCTGGGGC | GTCAACGTCC | AGCCCTACTC  |
| 1681 | CGGCTCCCCG  | GCCAACTTCG | CCGCCTACAC  | CGCCGTCTCT | AACCCCCACG | ACCGCATCAT  |
| 1741 | GGGGCTAGAT  | CTCCGCTCCG | GCGGCCACCT  | CACCCACGGC | TACTACACCT | CCGGCGGAAA  |
| 1801 | GAAGATCTCC  | GCCACCTCCA | TTTACTTCGA  | GAGTCTCCCT | TACAAGGTAA | ACTCCACCAC  |
| 1861 | CGGCTACATC  | GACTACGACC | GCTTGGAAGA  | AAAAGCCCTA | GACTTCAGGC | CAAAACTCAT  |
| 1921 | AATCTGCGGT  | GGCGCTGCGT | ACCCTCGCGA  | TTGGGACTAC | AAACGTTTCA | GGGAAGTCGC  |
| 1981 | TGATAAGTGC  | GGAGCATTGC | TTCTCTGCGA  | CATGGCGCAC | ACTAGCGGCC | TTGTGGCCGC  |
| 2041 | GCAGGAAGTG  | AACAGCCCCT | TCGAGTATTG  | CGACATTGTG | ACCACCACGA | CTCACAAGAG  |
| 2101 | CTTGCGGGGC  | CCACGTGCGG | GGATGATCTT  | TTACCGGAAG | GGCCCCAAGC | CGCCGAAGAA  |
| 2161 | GGGGCAGCCG  | GAGAACGCGG | TTTATGATTT  | CGAGGACAAG | ATTAACCTTC | CGGTGTTCCC  |
| 2221 | TTGCTGTCAG  | GGTGGGCCCC | ACAACCACCA  | GATCGGTGCT | CTCGCCGTGG | CGCTGAAGCA  |
| 2281 | GGCCGCGTCG  | CCCGGGTTTA | AGGCCTACGC  | GAAGCAGGTT | AAGGCGAACG | CCGTTGCGCT  |
| 2341 | TGGAATAATAC | TTGATGGGGA | AAGGGTACAG  | CCTTGCTACT | GGCGGAACGG | AGAACCATCT  |
| 2401 | TGTTTTGTGG  | GATCTGAGAC | CTCTTGGATT  | GACTGGGTAT | AAGGTGGAGA | AACTCTGTGA  |
| 2461 | TCTCTGTAAC  | ATTACTGTTA | ACAAGAACGC  | TGTTTTTGGT | GATAGCAGTG | CCTTGGCCCC  |
| 2521 | TGGTGGAGTG  | CGAATTGGTG | CCCTGCCCAT  | GACTTCTAGG | GGTTTGGTTG | AAAAAGACTT  |
| 2581 | TGAGCAGATT  | GGTGAGTTCC | TTACCCGTGC  | TGTGACTCTC | ACACTGGAGA | TCCAGAAGGA  |
| 2641 | GCATGGCAAA  | CTTCTCAAGG | ATTTCAACAA  | GGGTCTCGTC | AACAACAAGG | CTATTGAAGA  |
| 2701 | TCTCAAAGCT  | GATGTTGAGA | AGTTCTCTGC  | CTTGTTTGAC | ATGCCTGGCT | TCCTGGTATC  |
| 2761 | TGAAATGAAG  | TACAAGGATT | AGCCTAGGTT  | CGAGTATTAT | GGCATTGGGA | AAACTGTTTT  |
| 2821 | TCTTGTAACCA | TTTGTTGTGC | TTGTAATTTA  | CTGTGTTTTT | TATTTCGGTT | TCGCTATCGA  |
| 2881 | ACTGTGAAAT  | GGAAATGGAT | GGAGAAGAGT  | TAATGAATGA | TATGGTCCTT | TTGTTTCAATC |
| 2941 | TCAAATTAAT  | ATTATTTGTT | TTTTCTCTTA  | TTTGTTGTGT | GTGAATTG   | AAATTATAAG  |
| 3001 | AGATATGCAA  | ACATTTTGTT | TTGAGTAAAA  | ATGTGTCAAA | TCGTGGCCTC | TAATGACCGA  |
| 3061 | AGTTAATATG  | AGGAGTAAAA | CACTTGTAGT  | TGTACCATTA | TGCTTATCA  | CTAGGCAACA  |
| 3121 | AATATATTTT  | CAGACCTAGA | AAAGCTGCAA  | ATGTTACTGA | ATACAAGTAT | GTCCTCTGTG  |
| 3181 | GTTTTAGACA  | TTTATGAAC  | TTCTTTATG   | TAATTTTCCA | GAATCCTTG  | CAGATTCTAA  |
| 3241 | TCATTGCTTT  | ATAATTATAG | TTATACTCAT  | GGATTTGTAG | TTGAGTATGA | AAATATTTTT  |
| 3301 | TAATGCATTT  | TATGACTTGC | CAATTGATTG  | ACAACATGCA | TCAATCCGCG | GTTATGACTC  |
| 3361 | TCTTAAGAGA  | GTCATGAATT | CGAGCTTCCA  | GAAGGTAATT | ATCCAAGATG | TAGCATCAAG  |
| 3421 | AATCCAATGT  | TTACGGGAAA | AACTATGGAA  | GTATTATGTG | AGCTCAGCAA | GAAGCAGATC  |
| 3481 | AATATGCGGC  | ACATATGCAA | CCTATGTTCA  | AAAATGAAGA | ATGTACAGAT | ACAAGATCCT  |
| 3541 | ATACTGCCAG  | AATACGAAGA | AGAATACGTA  | GAAATTGAAA | AAGAAGAACC | AGGCGAAGAA  |
| 3601 | AAGAACTCTT  | AAGACGTAAG | CACGTGACGAC | AACAATGAAA | AGAAGAAGAT | AAGGTCGGTG  |
| 3661 | ATTGTGAAA   | AGACATAGAG | GACACATGTA  | AGGTGAAAA  | TGTAAGGGCG | GAAAGTAACC  |
| 3721 | TTATCACAAA  | GGAATCTTAT | CCCCACTAC   | TTATCCTTTT | ATATTTTTC  | GTGTCATTTT  |
| 3781 | TGCCCTTGAG  | TTTTCTATA  | TAAGGAACCA  | AGTTCGGCAT | TTGTGAAAAC | AAGAAAAAAT  |
| 3841 | TTGGTGTAAG  | CTATTTTCTT | TGAAGTACTG  | AGGATACAAC | TTCAGAGAAA | TTTGTAAGTT  |
| 3901 | TGTGATCCAT  | GGTGAGCAAG | GGCGAGGAGC  | TGTTACCGG  | GGTGGTGCCC | ATCCTGGTCG  |
| 3961 | AGCTGGACGG  | CGACGTAAAC | GGCCACAAGT  | TCAGCGTGTC | CGGCGAGGGC | GAGGGCGATG  |
| 4021 | CCACCTACGG  | CAAGCTGACC | CTGAAGTTCA  | TCTGCACCAC | CGGCAAGCTG | CCCGTGCCCT  |
| 4081 | GGCCACCCCT  | CGTGACCACC | TTACCTTACG  | GCGTGACGTG | CTTCAGCCGC | TACCCCGACC  |
| 4141 | ACATGAAGCA  | GCACGACTTC | TTCAAGTCCG  | CCATGCCCGA | AGGCTACGTC | CAGGAGCGCA  |
| 4201 | CCATCTTCTT  | CAAGGACGAC | GGCAACTACA  | AGACCCGCGC | CGAGGTGAAG | TTCGAGGGCG  |
| 4261 | ACACCCTGGT  | GAACCGCATC | GAGCTGAAGG  | GCATCGACTT | CAAGGAGGAC | GGCAACATCC  |
| 4321 | TGGGGCACAA  | GCTGGAGTAC | AACTACAACA  | GCCACAACGT | CTATATCATG | GCCGACAAGC  |
| 4381 | AGAAGAACGG  | CATCAAGGTG | AACTTCAAGA  | TCCGCCACAA | CATCGAGGAC | GGCAGCGTGC  |
| 4441 | AGCTCGCCGA  | CCACTACCAG | CAGAACACCC  | CCATCGGCGA | CGGCCCGGTG | CTGCTGCCCG  |
| 4501 | ACAACCACCTA | CCTGAGCACC | CAGTCCGCCC  | TGAGCAAAGA | CCCCAACGAG | AAGCGCGATC  |
| 4561 | ACATGGTCCT  | GCTGGAGTTC | GTGACCGCCG  | CCGGGATCAC | TCACGGCATG | GACGAGCTGT  |
| 4621 | ACAAGTAAAG  | CGGCCGCCCG | GCTGCAGATC  | GTTCAAACAT | TTGGCAATAA | AGTTTCTTAA  |
| 4681 | GATTGAATCC  | TGTTGCCGGT | CTTGCGATGA  | TTATCATATA | ATTTCTGTTG | AATTACGTTA  |

**Supplemental Figure S6.** F-SHMT08cΔ+S190A-CDS, insert size, vector, restriction enzymes, and sequenced positive clones used for cloning.

|      |             |             |            |             |             |             |       |             |            |             |             |             |            |
|------|-------------|-------------|------------|-------------|-------------|-------------|-------|-------------|------------|-------------|-------------|-------------|------------|
| 4801 | GAGTCCCAGCA | ATTATACATT  | TAATACGCGA | TAGAAAACAA  | AATATAGCGC  | GCAAACCTAGG | 8041  | GCCTGCCCGG  | CCTCCTCCTT | CAAATCGTAC  | TCCGGCAGGT  | CATTTGACCC  | GATCAGCTTG |
| 4861 | ATAAATTATC  | GCGCGCGGTG  | TCATCTATGT | TACTAGATCT  | GATGATAAGC  | TGTCAAACAT  | 8101  | CGCACGGTGA  | AACAGAACTT | CTTGAACCTT  | CCGGCGCTGT  | CAGTCGCGTT  | GTAGATCGTC |
| 4921 | GAGAATTAAAT | TCGTAATCAT  | GTCATAGCTG | TTTCTCTGTG  | GAAATTTGTTA | TCCGCTCACAA | 8161  | TTGAAACAAC  | ATCTGGCTTC | TGCCTTGCCCT | GCGGCGCGGC  | GTGGCAGGCG  | GTAGAGAAAA |
| 4981 | ATTCCACACA  | ACATACGAGC  | CGGAAGCATA | AAGTGTAAG   | CCTGGGGTGC  | CTAATGAGTG  | 8221  | CGGCCGATGC  | CGGGATCGAT | CAAAAAGTAA  | TCCGGGTGAA  | CCGTCAGCAC  | GTCCGGGTTC |
| 5041 | AGCTAACTCA  | CATTAAATGT  | GTGCGCTCA  | CTGCGCGCTA  | TCCAGTCCGG  | AAACCTGTGCG | 8281  | TTGCGCTCTG  | TGATCTCCGG | GTACATCCAA  | TACAGTAGCT  | CGATCTCGAT  | GTACTCCGCG |
| 5101 | TGCCAGCTGC  | ATTAATAGTC  | CGGCCAACG  | GCGGCGGAG   | CGGGTTTGG   | TATTGGCTAG  | 8341  | GCGCGGGTGT  | GCCTCTTCTT | GATCTTGTA   | CGGCTTAATCA | AGGCTTCCAC  | CTCGGATACC |
| 5161 | AGCAATTCCG  | CGTTAATTCA  | GTACATTAAT | AACGTCGCGA  | ATGTGTTATT  | AAGTTGTCTA  | 8401  | GTCACCAAGC  | GGCCGTTCTT | GGCCTTCTTC  | GTACGCTGCA  | TGGCAACGTG  | CGTGGTGTTC |
| 5221 | AGCGTCAATT  | TGTTTACACC  | ACAATATATC | CTGCCACCAG  | CCAGCCAAAC  | GCTCCCCGAC  | 8461  | AACCGAATGC  | AGGTTTCTAC | CAGGTCGCTC  | TTCTGCTTTC  | CGCATCTGCG  | TCCGCGGCGT |
| 5281 | CGGCAGCTCG  | GCACAAAATC  | ACCACTCGAT | ACAGGCAAGC  | CATCAGTCGC  | GGACGGCGTC  | 8521  | AACCTTAGTA  | GCTCCGCAAC | GTGTGGACGG  | AACACGCGGC  | CGGGCTTGTC  | TCCGCTCCCT |
| 5341 | AGCGGGAGAG  | CCGTTGTAA   | GCGGCAGACT | TTGCTCATGT  | TACCGATGCT  | ATTCCGGAAG  | 8581  | TCCCGGTATC  | GGTTCATGGA | TTCGGTTAGA  | TGGGAAACCG  | CCATCAGTAC  | CAGGTCGTAA |
| 5401 | ACGGCAACTA  | AGCTGCCGGG  | TTTGAACAC  | GGATGATCTC  | GCGGAGGGTA  | GCATGTTGAT  | 8641  | TCCCAACAC   | TGCCCATGCC | GGCCGGCCCT  | GCGGAAACCT  | CTACGTCGCC  | GTCTGGAAGC |
| 5461 | TGTAACGATG  | ACAGAGCGTT  | GCTGCCTGTG | ATCCAGATCA  | TGAACAATAA  | AACCTGTCTG  | 8701  | TCGTAGCGGA  | TACCTCTGCC | AGCTCGTCGG  | TCACGCTTCG  | ACAGACGGAA  | AACGCCACAG |
| 5521 | TTACATAAAC  | AGTAATACAA  | GGGGTGTTAT | GAGCCATATT  | CAACGGGAAA  | CGTCTTGCTC  | 8761  | TCCATGATGC  | TGCGACTATC | GCGGGTGCCC  | ACGTCATAGA  | GCATCGGAAC  | GAAAAAATCT |
| 5581 | TAGCCCGCGA  | TTAAATTCCA  | ACATGGATGC | TGATTATAT   | GGGTATAAAT  | GGGCTCGCGA  | 8821  | GGTTGCTCGT  | CGCCCTTGCG | CGGCTTCCTA  | ATCGACGCGC  | CACCGCGTGC  | CGGCGGTTGC |
| 5641 | TAAATGTCGG  | CAATCAGGTG  | CGACAATCTA | TCGATTGTAT  | GGGAAGCCCG  | ATGCGCCAGA  | 8881  | CGGGATCTCT  | TGCGGATTCG | ATCAGCGCGC  | GCTTGCCACG  | ATTCACCTGG  | CGGTGCTTCT |
| 5701 | TTGTTTCTTG  | AAACATGGCA  | AGAGTAGCGT | TGCCAATGAT  | TTTACAGATG  | AGATGGTCAG  | 8941  | GCTCTGATGC  | TTGTCGCTGT | GCGGCGCTGC  | GCGGCGCTTCA | ACTTCTCCAC  | CAGGTCATCA |
| 5761 | ACTAAACTGG  | CTGACGGAAT  | TTATGCTCTC | TCCGACCATC  | AAGCATTTTA  | TCCGTACTCC  | 9001  | CCCAGCGCGC  | CGCCGATTTG | TACCGGGCCG  | GATGGTTTGC  | GACCGTCACG  | CCGATTCTCT |
| 5821 | TGATGATGCA  | TGGTTACTCA  | CCACTGCGAT | CCCCGGGAAA  | ACAGCATTTCC | AGGTATTAGA  | 9061  | GGGCTTGGGG  | GTTCAGATGC | CATTGACAGG  | CCGCGACAG   | ACCCAGCCGC  | TTACGCTTGG |
| 5881 | AGAATATCCT  | GATTACGGTG  | AAAATATTGT | TGATGCGCTG  | CGAGTGTGCC  | TGCGCGGTTG  | 9121  | CCAACGCCCT  | GTCTCTCCAC | ACATGGGGCA  | TTCCACGCGC  | TCGGTGCCCTG | GTGTGTTCTG |
| 5941 | GCATTCGATT  | CCTGTTTGTA  | ATTGTCCTTT | TAACAGCGAT  | CGCGTATTTC  | GTCTCGCTCA  | 9181  | ATTTTCCATG  | CGCCCTCCTT | TAGCCGCTAA  | AATTATCTA   | CTCATTTTAT  | CATTGCTCTA |
| 6001 | GGCGCAATCA  | CGAATGAATA  | ACGGTTTGGT | TGATGCGATG  | GATTTTGTAT  | ACGAGCGTAA  | 9241  | TTTACTCTGG  | TAGCTGCGCG | ATGTATTAG   | ATAGCAGCTC  | GGTAATGGTC  | TTGCCCTTGG |
| 6061 | TGGCTGGCCT  | GTTGAACAAG  | TCTGGAAGAA | AATGCATAAA  | CTTTTGCCAT  | TCTCACCCTG  | 9301  | GTACCGCGTA  | CATCTTTCAG | TTGGTGTGAT  | CCTCCGCCGC  | CAACTGAAAG  | TTGACCCGCT |
| 6121 | TTCACTGCTC  | ACTCATGGTG  | ATTTCTCACT | TGATAACCTT  | ATTTTTCAGC  | AGGGGAAATG  | 9361  | TCATGCTGCG  | CGTGTCTGCC | AGGCTGGCCA  | ACGTTGACAG  | CTTGCTGCTG  | CGTGCCTGCG |
| 6181 | AATAGGTTGT  | ATTGATGTTG  | GACGAGTCGG | AATCGCAGAC  | CGATACCAGG  | ATCTTGCCAT  | 9421  | GACGCGCGCG  | ACTTAGCGTG | TTTGTGCTTT  | TGCTCATTTT  | CTCTTTTACCT | CATTAATCTA |
| 6241 | CCTATGGAAC  | TGCCTCGGTG  | AGTTTTCTCC | TTCATTACAG  | AAACGGCTTT  | TTCAAAAAAT  | 9481  | AATGAGTTT   | GATTTAATTT | CAGCGGCCAG  | CGCCTTGCAT  | TCGCGGGCAG  | CGTCCGCTCA |
| 6301 | TGGTATTGAT  | TATCCTGATA  | TGAATAAAT  | GCAGTTTCTG  | TTGATGCTCG  | ATGAGTTTTT  | 9541  | GGGTTCTGAT  | TCAAGAACGG | TTGTGCCGCG  | GGCGGCGATG  | CCTGGGTAGC  | TCACGCGCTG |
| 6361 | CTAAGAATTA  | ATTCATGATC  | CTGCATGACC | AAAATCCCTT  | AACGTGAGTT  | TTGTTTCCAC  | 9601  | CGTGATACGC  | GACTCAAGAA | TGGGCGAGTC  | GTACCCGCGC  | AGCGCTCGTG  | CAACTCACC  |
| 6421 | TGAGCGTCA   | ACCCCGTAGA  | AAAGATCAAA | GGATCTTCTT  | GAGATCTCTT  | TTTTCTGCGC  | 9661  | GCCGATGCGC  | GTGCTTTTGA | TCGCCCCGTA  | CACGACAAAG  | CGCGCTTGTA  | GGCTTCCATC |
| 6481 | GTAATCTGCT  | GCTTCAAAAC  | AAAAAAACAA | CCGCTTACCAG | CGGTGGTTTG  | TTTGCCGGAT  | 9721  | CGTGACCTCA  | ATGCGCTGCT | TAACCAAGTC  | CACCAGGTCG  | GCGGTGGCCC  | ATATGTCGTA |
| 6541 | CAAGAGCTAC  | CAACTCTTTT  | TCCGAAGGTA | ACTGGCTTCA  | GCAGAGCGCA  | GATACCAAAAT | 9781  | AGGGCTTGGC  | TGCAACGGAA | TACGACGAA   | GTCCGCTGCC  | TTGATCGCGG  | ACACAGCCAA |
| 6601 | ACTGCTCTTC  | TAGTGATGCC  | TAGTTAGGCG | CACCACTCTG  | AGAACTCTGT  | AGCAGCGCCT  | 9841  | GTCCGCGCCT  | TGGGCGCTCT | CGTGCATCAC  | TACGAAGTGC  | CGCGGCCGCA  | TGGCTTCCAA |
| 6661 | ACATAGCTCG  | CTCTGTACCA  | CCTGTTTACC | GTGGCTGCTG  | CCAGTGGCGA  | TAAGTCTGTG  | 9901  | GTCCGCGTCA  | ATCGTCGGGC | GGTCGATGCC  | GACAACGGTT  | AGCGGTTGAT  | CTTCCCGCAC |
| 6721 | CTTACCGGGT  | TGGACTCAAG  | ACGATAGTTA | CCGGATAAGG  | CGCAGCGGTC  | GGGCTGAACG  | 9961  | GGCCGCCCAA  | TCGCGGGGAC | TGCCCTGGGG  | ATCGGAATCG  | ACTAACAGAA  | CATCGGCCCT |
| 6781 | GGGGGTTCTG  | GCACACAGCC  | CAGCTTGAG  | CGAACGACCT  | ACACCGAACT  | GAGATACCTA  | 10021 | GCGGAGTTGC  | AGGGCGCGGG | CTAGATGGGT  | TGCGATGGTC  | GTCTTGCCCTG | ACCCGCCCTT |
| 6841 | CAGCGTGAGC  | TATGAGAAAG  | CGCCACGCTT | CCCGAAGGGA  | GAAAGGCGGA  | CAGGTATCCG  | 10081 | CTGGTTAAGT  | ACAGCGATAA | CCTTCATGCG  | TTCCCTTTGC  | GTATTTGTTT  | ATTTACTCAT |
| 6901 | GTAAGCGGCA  | GGGTCGGAAC  | AGGAGAGCGC | ACGAGGGAGC  | TTCCAGGGGG  | AAACGCTGGG  | 10141 | CGCATCATAT  | ACGCGAGCAG | CGCATGACGC  | AAGCTGTGTT  | ACTCAAAATC  | ACATCACCTT |
| 6961 | TATCTTTATA  | GTCCTGTGCG  | GTTTCGCCAC | CTCTGACTTG  | AGCGTCGATT  | TTTGTGATGC  | 10201 | TTTAGACGGC  | GGCGCTCGGT | TTCTTCAGCG  | GCCAAGTTTG  | CTCCGACAGC  | CGCCAGCTTG |
| 7021 | CTGTCAGGGG  | GGCGGAGCCT  | ATGGAATAAT | GCCAGCAACG  | CGGCTCTTTT  | ACGGTTTCTG  | 10261 | GCATCAGACA  | AACCGGCGAG | GATTTTCATG  | AGCCGACAGG  | TTGAGACGTG  | CGCGGCGGCG |
| 7081 | GCCTTTTGGT  | GGCCTTTTGC  | TTCATGTGTC | TTTCTGCGGT  | TATCCCTGTA  | TTCTGTGGAT  | 10321 | TCGAACACGT  | ACCCGCGCGC | GATCATCTCC  | GCCTCGATCT  | CTTCGGTAAAT | GAAAAACGGT |
| 7141 | AACCGTATTA  | CCGCCCTTGA  | GTGAGCTGAT | ACCGCTCGCC  | GCAGCCGAAC  | GACCGAGCGC  | 10381 | TCGTCCTGGC  | CGTCTGTTGT | CGGTTTTCAT  | CTTGTTCTCT  | TTGGCGTTTA  | TTCTCGGCGT |
| 7201 | AGCGAGCTAG  | TGAGCGGAGA  | AGCGGAAGAG | CGCCTGATGC  | GGTATTTTCT  | CCTTAGCAGT  | 10441 | CCGCGAGGCG  | GTCCGCGCTG | GTCAATGCGT  | CCTGACGGAA  | GGCAGCCGCG  | CGCTGGGCTC |
| 7261 | CTGTGCGGTA  | TTTCAACCG   | CATATGGTGC | ACTCTCAGTA  | AAATCTGCTG  | TGATGCCGCA  | 10501 | CGGTGGGCGT  | CACCTTCTCG | CTGCGCTCAA  | GTGCGCGGTA  | CAGGTCGAG   | CGATGCACGC |
| 7321 | TAGTTAAGCC  | AGTATACACT  | CCGCTATCGC | TACGTGACTG  | GGTCATGGCT  | GCGCCCCGAC  | 10561 | CAAGCAGTGC  | AGCCGCTCTT | TTACCGGTGC  | GGCCTTCTGT  | GTGATCAGC   | TCCGCGGCGT |
| 7381 | ACCCGCAAC   | ACCCGCTGAC  | GCGCCCTGAC | GGGCTTGTCT  | GCTCCCGGCA  | TCCGCTTACA  | 10621 | GCGCGATCTG  | TGCGCGGGTG | AGGGTAGGGC  | GGGGGCCAAA  | CTTACGCTGT  | CGGCGCTTGG |
| 7441 | GACAAGCTGT  | GACCGTCTGC  | GGGAGCTGAC | TGTGTACAGG  | GTTTTCACCG  | TCATCACCAG  | 10681 | CGGCTTCGCG  | CCCGCTCCGG | GTGCGGTGCA  | TGATTAGGGA  | ACGCTCGAAC  | TCCGCAATGC |
| 7501 | AACGCGCGAG  | GACGGGTGCC  | TTGATGTGGG | GCGCGGCGGT  | GAGTGGGCGA  | CGACGCGGCT  | 10741 | CGGCGAACAC  | GGTCAACAC  | ATGCGCGCGC  | CCGCGCTGGT  | GGTGTCCGCG  | CACGCGCTCT |
| 7561 | TGTCGCGGCC  | CTGTGATATT  | GCCTGGCCGT | AGGCCAGCCA  | TTTTTGAGCG  | GCCAGCGGCC  | 10801 | CCAGGCTACG  | CAGCCGCGCG | CGCGCTCTCT  | CGGCGTGTGT  | GGCAATGTTC  | AGTAGGTCGC |
| 7621 | CGCATAGGCC  | GACCGCAAGC  | GGCGGGGCGT | AGGGAGCGCA  | GCGACCGAAG  | GGTAGGCGCT  | 10861 | GGGTGCTGCG  | GGCCAGGCGG | TCTAGCCTGG  | TCATGTCTAC  | AACGTCGCCA  | GGGCGTAGGT |
| 7681 | TTTTGACGCT  | CTCCGCTGTG  | GCGCTGGCCA | CACAGGCGAG  | CGAGGCTTTA  | TTCTGGTTTA  | 10921 | GGTCAAGCAT  | CCTGGCCACG | TCCGGGCGGT  | CGCGCTGTGT  | GCCGGTGATC  | TTCTCGGAAA |
| 7741 | AGAGTTTTAA  | TAAAGTTTTAA | AGAGTTTTAG | GCGGAAAAAT  | CGCCTTTTTT  | CTCTTTTATA  | 10981 | ACAGCTTTGT  | GACGCGCGCG | CGGCTGAGTT  | GCGGCGGTGT  | GTGTTGTCAG  | CTTGGTCTG  |
| 7801 | TCAGTCACTT  | ACATGTGTGA  | CCGGTTCCCA | ATGTACCGGT  | TTGGGTTCCC  | AATGTACGGG  | 11041 | CGGTGCTGAC  | GCGGGCATAG | CCCAGCAGGC  | CAGCGGCGGC  | GCTCTGTGTC  | ATGGCGTAAT |
| 7861 | TTCCGGTTTC  | CAATGTACGG  | CTTTGGGTTT | CCAATGTACG  | TGATATCCAC  | AGGAAAGGTA  | 11101 | GTCTCCGGTT  | TAGTGCAGAA | GTATTCTACT  | TTATGCGACT  | AAAACACGCG  | ACAAGAAAAA |
| 7921 | CCTTTTTCGAC | CTTTTTCGCC  | TGCTAGGGCA | ATTTGCCCTA  | GCATCTGCTC  | CGTACATTAG  | 11161 | GCCAGGAAAA  | GCGAGGCGGC | GCAGCTGTGC  | CGCTAAGTTA  | GGACTTGTGC  | GACATGTCGT |
| 7981 | GAACCGGCGG  | ATGCTTCGCC  | CTCGATCAGG | TTGCGGTAGC  | GCATGACTAG  | GATCGGGCCA  | 11221 | TTTCAGAAGA  | CGGCTGCACT | GAACGTCAGA  | AGCCGACTGC  | ACTATAGCAG  | CGGAGGGGTT |
|      |             |             |            |             |             |             | 11281 | GGATCAAAAGT | ACT        |             |             |             |            |

**Supplemental Figure S6. F-SHMT08cΔ+S190A-CDS, insert size, vector, restriction enzymes, and sequenced positive clones used for cloning.**

**Gene Name** F-SHMT08cΔ+H218A-CDS

**Cloning Vector** pG2RNAi2

**Length (bp)** 1430

**Cloning Sites** Ascl-AvrII

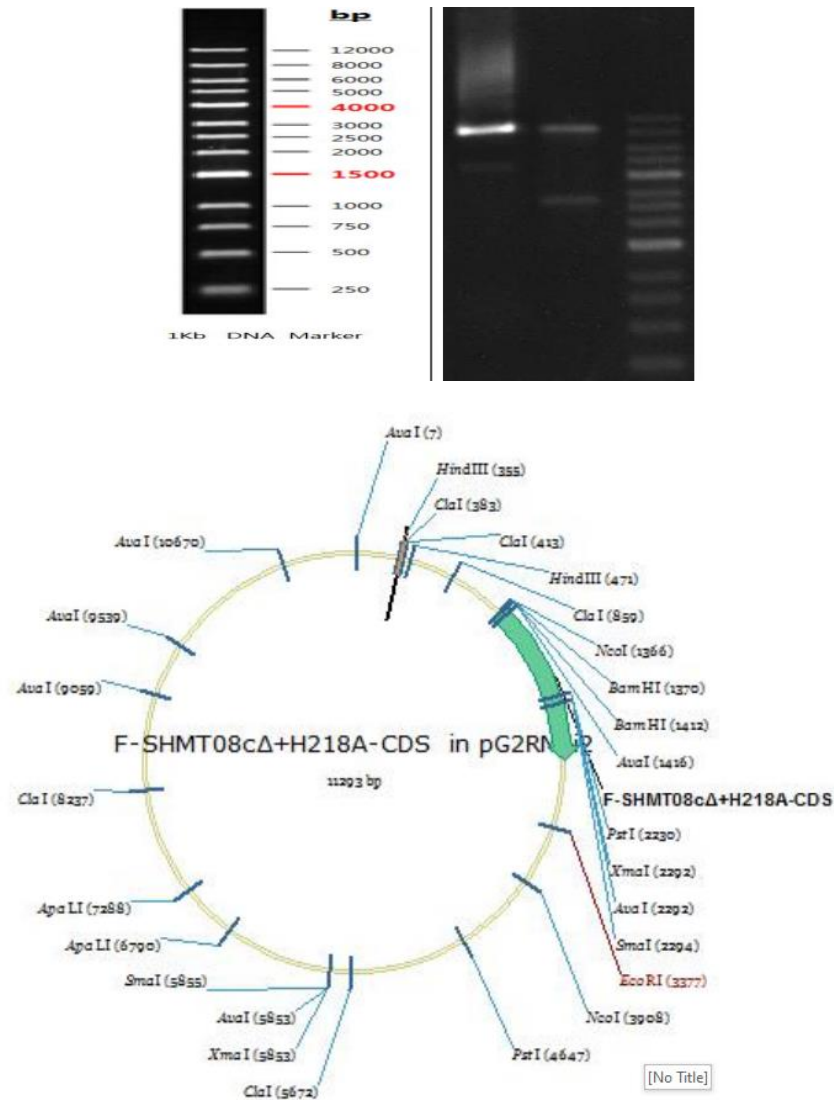

**Supplemental Figure S7.** F-SHMT08cΔ+H218A-CDS, insert size, vector, restriction enzymes, and sequenced positive clones used for cloning.

## Detailed Sequence of the Whole Construct:

```

1  TTGATCCCGA GGGGAACCCT GTGGTTGGCA TGCACATACA AATGGACGAA CGGATAAACC
61  TTTTCACGCC CTTTAAATA TCCGTTATTC TAATAAACGC TCTTTTCTCT TAGGTTTACC
121 CGCCAATATA TCCTGTCAAA CACTGATAGT TTAAACTGAA GGCGGGAAAC GACAATCTGA
181 TCCAAGCTCA AGCTCATTCG CCATTCAGGC TGCGCAACTG TTGGGAAGGG CGATCGGTGC
241 GGGCCTCTTC GCTATTACGC CAGCTGGCGA AAGGGGGATG TGCTGCAAGG CGATTAAGTT
301 GGGTAACGCC AGGGTTTTCC CAGTCACGAC GTTGTA AAC GACGGCCAGT GCCAAGCTTA
361 TTACCCTGTT ATCCCTAGAT ATCGATTTTG GCTACCTTAA GG TAGCCAAA ATCGATCACT
421 AGTGC GGCCG CGGGCCCAAT ATAACAACGA CGTCGTAACA GATAAAGCGA AGCTTGAAGG
481 TGCATGTGAC TCCGTCAAGA TTACGAAACC GCCAACTACC ACGCAAATTG CAATTCTCAA
541 TTTCTAGAA GGACTCTCCG AAAATGCATC CAATACCAA TATTACCCGT GTCATAGGCA
601 CCAAGTGACA CCATACATGA ACACGCGTCA CAATATGACT GGAGAAGGGT TCCACACCTT
661 ATGCTATAAA ACGCCCCACA CCCCTCCTCC TTCCTTCGCA GTTCAATTCC AATATATTCC
721 ATTCTCTCTG TGTATTTCCC TACCTCTCCC TTCAAGGTTA GTCGATTCT TCTGTTTTTC
781 TTCTTCGTTT TTTCCATGAA TTGTGTATGT TCTTTGATCA ATACGATGTT GATTTGATTG
841 TGTTTTGTTT GGTTTCATCG ATCTTCAATT TTCATAATCA GATTCAGCTT TTATTATCTT
901 TACAACAACG TCCTTAATTT GATGATTCTT TAATCGTAGA TTTGCTCTAA TTAGAGCTTT
961 TTCATGTCAG ATCCCTTTAC AACAAGCCTT AATTGTTGAT TCATTAATCG TAGATTAGGG
1021 CTTTTTTCAT TGATTACTTC AGATCCGTTA AACGTAACCA TAGATCAGGG CTTTTTCATG
1081 AATTACTTCA GATCCGTTAA ACAACAGCCT TATTTTTTAT ACTTCTGTGG TTTTCAAGA
1141 AATTGTTTCA ATCCGTTGAC AAAAAGCCTT ATTCGTTGAT TCTATATCGT TTTTCGAGAG
1201 ATATTGCTCA GATCTGTTAG CAACTGCCTT GTTTGTGAT TCTATTGCCG TGGATTAGGG
1261 TTTTTTTTCA CGAGATTGCT TCAGATCCGT ACTTAAGATT ACGTAATGGA TTTTGATTCT
1321 GATTTATCTG TGATTGTTGA CTCGACAGCG GCCGCACCGG CGCGCCATGG ATCCAGTAAG
1381 CGTGTGGGGT AACACGCCCT TGGCGACGGT GGATCCCGAG ATCCATGACC TCATCGAGAA
1441 GGAGAAGCGC CGTCAATGCC GCGGAATCGA GTCATCGCC TCCGAGAACT TCACCTCCTT

```

|      |             |             |             |            |             |             |
|------|-------------|-------------|-------------|------------|-------------|-------------|
| 1501 | CGCCGTCATC  | GAGGCCCTCG  | GCAGCGCTCT  | CACGAACAAA | TACTCCGAGG  | GCATGCCGGG  |
| 1561 | CAACCGCTAC  | TACGGCGGCA  | ATGAATACAT  | CGACCAGATC | GAAAACCTCT  | GCCGCTCACG  |
| 1621 | CGCCCTCCAA  | GCCTTCCACC  | TCGACGCCCA  | ATCCTGGGGC | GTCAACGTCC  | AGCCCTACTC  |
| 1681 | CGGCTCCTCC  | GCCAACTTCG  | CCGCCTACAC  | CGCCGTCCTC | AACCCCCACG  | ACCGCATCAT  |
| 1741 | GGGGCTAGAT  | CTCCGCTCCG  | GCGGCCACCT  | CACCCACGGC | TACTACACCT  | CCGGCGGAAA  |
| 1801 | GAAGATCTCC  | GCCACCTCCA  | TTTACTTCGA  | GAGTCTCCCT | TACAAGGTAA  | ACTCCACCAC  |
| 1861 | CGGCTACATC  | GACTACGACC  | GCTTGGAAGA  | AAAAGCCCTA | GACTTCAGGC  | CAAAACTCAT  |
| 1921 | AATCTGCGGT  | GGCAGCGCGT  | ACCCTCGCGA  | TTGGGACTAC | AAACGTTTCA  | GGGAAGTCGC  |
| 1981 | TGATAAGTGC  | GGAGCATTGC  | TTCTCTGCGA  | CATGGCGGCT | ACTAGCGGCC  | TTGTGGCCGC  |
| 2041 | GCAGGAAGTG  | AACAGCCCCC  | TCGAGTATTG  | CGACATTGTG | ACCACCACGA  | CTCACAAAGAG |
| 2101 | CTTGCGGGGC  | CCACGTGCGG  | GGATGATCTT  | TTACCGGAAG | GGCCCCAAGC  | CGCCGAAGAA  |
| 2161 | GGGGCAGCCG  | GAGAACGCGG  | TTTATGATTT  | CGAGGACAAG | ATTAACCTCG  | CGGTGTTCCT  |
| 2221 | TTGCTGTCAG  | GGTGGGCCCC  | ACAACCACCA  | GATCGGTGCT | CTCGCCGTGG  | CGCTGAAGCA  |
| 2281 | GGCCGCGTCG  | CCCGGGTTTA  | AGGCCTACGC  | GAAGCAGGTT | AAGCGCAACG  | CCGTTGCGCT  |
| 2341 | TGAAAATAC   | TTGATGGGGA  | AAGGGTACAG  | CCTTGTCACT | GGCGGAACGG  | AGAACCATCT  |
| 2401 | TGTTTTGTGG  | GATCTGAGAC  | CTCTTGGAAT  | GACTGGGTAT | AAGGTGGAGA  | AACTCTGTGA  |
| 2461 | TCTCTGTAAC  | ATTACTGTTA  | ACAAGAACGC  | TGTTTTTGGT | GATAGCAGTG  | CCTTGGCCCC  |
| 2521 | TGGTGGAGTG  | CGAATTGGTG  | CCCCTGCCAT  | GACTTCTAGG | GGTTTGGTTG  | AAAAAGACTT  |
| 2581 | TGAGCAGATT  | GGTGAGTTCC  | TTACCCGTGC  | TGTGACTCTC | ACACTGGAGA  | TCCAGAAGGA  |
| 2641 | GCATGGCAAA  | CTTCTCAAGG  | ATTTCACAA   | GGGTCTCGTC | AACAACAAGG  | CTATTGAAGA  |
| 2701 | TCTCAAAGCT  | GATGTTGAGA  | AGTTCTCTGC  | CTTGTTTGAC | ATGCCTGGCT  | TCCTGGTATC  |
| 2761 | TGAAATGAAG  | TACAAGGATT  | AGCCTAGGTT  | CGAGTATTAT | GGCATTGGGA  | AAACTGTTTT  |
| 2821 | TCTTGTACCA  | TTTGTGTGTC  | TTGTAATTAT  | CTGTGTTTTT | TATTCGGTTT  | TCGCTATCGA  |
| 2881 | ACTGTGAAAT  | GGAAATGGAT  | GGAGAAGAGT  | TAATGAATGA | TATGGTCCTT  | TTGTTTCATT  |
| 2941 | TCAAATTAAT  | ATTATTTGTT  | TTTCTCTCTA  | TTTGTGTGTT | GTTGAATTTG  | AAATTATAAG  |
| 3001 | AGATATGCAA  | ACATTTTGTT  | TTGAGTAAAA  | ATGTGTCAAA | TCGTGGCCTC  | TAATGACCGA  |
| 3061 | AGTTAATATG  | AGGAGTAAAA  | CACCTTGTA   | TGTACCATTA | TGCTTATTCA  | CTAGGCAACA  |
| 3121 | AATATATTTT  | CAGACCTAGA  | AAAGCTGCAA  | ATGTTACTGA | ATACAAGTAT  | GTCCTCTTGT  |
| 3181 | GTTTTAGACA  | TTTATGAAC   | TTCCCTTTATG | TAATTTTCCA | GAATCCTTGT  | CAGATTCTAA  |
| 3241 | TCATTGCTTT  | ATAATTATAG  | TTATACTCAT  | GGATTGTGAG | TTGAGTATGA  | AAATATTTTT  |
| 3301 | TAATGCATTT  | TATGACTTGC  | CAATTGATTG  | ACAACATGCA | TCAATCCGCG  | GTTATGACTC  |
| 3361 | TCTTAAGAGA  | GTCATGAATT  | CGAGCTTCCA  | GAAGGTAATT | ATCCAAGATG  | TAGCATCAAG  |
| 3421 | AATCCAATGT  | TTACGGGAAA  | AACTATGGAA  | GTATTATGTG | AGCTCAGCAA  | GAAGCAGATC  |
| 3481 | AATATGCGGC  | ACATATGCAA  | CCTATGTTCA  | AAAATGAAGA | ATGTACAGAT  | ACAAGATCCT  |
| 3541 | ATACTGCCAG  | AATACGAAGA  | AGAATACGTA  | GAAATGAAA  | AAGAAGAACC  | AGGCGAAGAA  |
| 3601 | AAGAATCTTG  | AAGACGTAAG  | CACCTGACGAC | AACAATGAAA | AGAAGAAGAT  | AAGTTCGGTG  |
| 3661 | ATTGTGAAAG  | AGACATAGAG  | GACACATGTA  | AGGTGGAAAA | TGTAAGGGCG  | GAAAGTAACC  |
| 3721 | TTATCACAAA  | GGAATCTTAT  | CCCCCACTAC  | TTATCCTTTT | ATATTTTTTCC | GTGTCATTTT  |
| 3781 | TGCCCTTGAG  | TTTTCTCTATA | TAAGGAACCA  | AGTTCGGCAT | TTGTGAAAAA  | AAGAAAAAAT  |
| 3841 | TTGGGTGTAAG | CTATTTTCTT  | TGAAGTACTG  | AGGATACAAC | TTCAGAGAAA  | TTTGTAAAGT  |
| 3901 | TGTGATCCAT  | GGTGAGCAAG  | GGCGAGGAGC  | TGTTCAACCG | GGTGGTGCCC  | ATCCTGGTCG  |
| 3961 | AGCTGGACGG  | CGACGTAAAC  | GGCCACAAGT  | TCAGCGTGTC | CGGCGAGGGC  | GAGGGCGATG  |
| 4021 | CCACCTACGG  | CAAGCTGACC  | CTGAAGTTCA  | TCTGCACCAC | CGGCAAGCTG  | CCCGTGCCCT  |
| 4081 | GGCCCCACCCT | CGTGACCACC  | TTCACCTACG  | GCGTGACAGT | CTTCAGCCGC  | TACCCCGACC  |
| 4141 | ACATGAAGCA  | GCACGACTTC  | TTCAAGTCCG  | CCATGCCCGA | AGGCTACGTC  | CAGGAGCGCA  |
| 4201 | CCATCTTCTT  | CAAGGACGAC  | GGCAACTACA  | AGACCCGCGC | CGAGGTGAAG  | TTGAGGGGCG  |
| 4261 | ACACCCTGGT  | GAACCGCATC  | GAGCTGAAGG  | GCATCGACTT | CAAGGAGGAC  | GGCAACATCC  |
| 4321 | TGGGGCACAA  | GCTGGAGTAC  | AACTACAACA  | GCCACAACGT | CTATATCATG  | GCCGACAAGC  |
| 4381 | AGAAGAACGG  | CATCAAGGTG  | AACTTCAAGA  | TCCGCCACAA | CATCGAGGAC  | GGCAGCGTGC  |
| 4441 | AGCTCGCCGA  | CCACTACCAG  | CAGAACACCC  | CCATCGGCGA | CGGCCCCGTG  | CTGCTGCCCG  |
| 4501 | ACAACCACTA  | CCTGAGCACC  | CAGTCCGCCC  | TGAGCAAAGA | CCCCAACGAG  | AAGCGCGATC  |
| 4561 | ACATGGTCTT  | GCTGGAGTTC  | GTGACCGCCG  | CCGGGATCAC | TCACGGCATG  | GACGAGCTGT  |
| 4621 | ACAAGTAAAG  | CGGCCGCCCG  | GCTGCAGATC  | GTTCAAACAT | TTGGCAATAA  | AGTTTCTTAA  |
| 4681 | GATTGAATCC  | TGTTGCCGGT  | CTTGCGATGA  | TTATCATATA | ATTTCTGTTG  | AATTACGTTA  |

**Supplemental Figure S7.** F-SHMT08cΔ+H218A-CDS, insert size, vector, restriction enzymes, and sequenced positive clones used for cloning.

|      |             |             |             |             |             |             |       |             |             |            |            |             |             |
|------|-------------|-------------|-------------|-------------|-------------|-------------|-------|-------------|-------------|------------|------------|-------------|-------------|
| 4801 | GAGTCCCAGCA | ATTATACATT  | TAATACGCGA  | TAGAAAACAA  | AATATAGCGC  | GCAAACCTAGG | 8041  | GCCTGCCCGG  | CCTCCTCCTT  | CAAATCGTAC | TCCGGCAGGT | CATTTGACCC  | GATCAGCTTG  |
| 4861 | ATAAATTATC  | GCGCGCGGTG  | TCATCTATGT  | TACTAGATCT  | GATGATAAGC  | TGTCAAACAT  | 8101  | CGCACGGTGA  | AACAGAACTT  | CTTGAACCTC | CCGGCGCGTG | CAGTCGCGTT  | GTAGATCGTG  |
| 4921 | GAGAATTAAAT | TCGTAATCAT  | GTCATAGCTG  | TTTCTCTGTG  | GAAATTTGTTA | TCCGCTCACAC | 8161  | TTGGAACAACC | ATCTGGGCTT  | TGCCTTGCCG | CGCGCCAGCG | GTGGCAGGAA  | GTAGAGAAAA  |
| 4981 | ATTCCACACA  | ACATACGAGC  | CGGAAGCATA  | AAGTGTAAG   | CCTGGGGTGC  | CTAATGAGTG  | 8221  | CGGCCGATGC  | CGGGATCGAT  | CAAAAAGTAA | TCCGGGTGAA | CCGTCAGCAC  | GTCCGGGTTC  |
| 5041 | AGCTAACTCA  | CATTAAATGC  | GTGCGCTCA   | CTGCGCGCTG  | TCCAGTCGGG  | AAACCTGTGCG | 8281  | TTGCGCTCTG  | TGATCTCCGG  | GTACATCCAA | TACAGTAGCT | CGATCTCGAT  | GTACTCCGCG  |
| 5101 | TGCCAGCTGC  | ATTAATAGT   | CGGCCAACG   | GCGGCCGAGG  | CGGGTTTGGG  | TATTGGCTAG  | 8341  | GCGCGGGTGT  | GCCTCTTTAC  | GATTCTGTAG | CGGCTTAATC | AGGCTTCCAC  | CTCGGATACC  |
| 5161 | AGCAATTCCG  | CGTTAATTCA  | GTACATTAAT  | AACGTCGCGA  | ATGTGTTTAT  | AAGTTGTCTA  | 8401  | GTCACCAAGC  | GGCGCTTCTT  | GGCCTTCTTC | GTACGCTGCA | TGGCAACGTG  | CGTGGTGTTC  |
| 5221 | AGCGTCAATT  | TGTTTACACC  | ACAATATATC  | CTGCCACCAG  | CCAGCCAAAC  | GCTCCCCGAC  | 8461  | AACCGAATGC  | AGGTTCTCTC  | CAGGTCGTCT | TTCTGCTTTC | CGCATCTGCG  | TCCGCGCGCT  |
| 5281 | CGGCAGCTCG  | GCACAAAATC  | ACCACTCGAT  | ACAGGCAGCC  | CATCAGTCGC  | GGACGGCGTC  | 8521  | AACCTTAGTA  | GCTCCGCAAC  | GTGTGGACGG | AACACGCGGC | CGGGCTTGTC  | TCCGCTCCGT  |
| 5341 | AGCGGAGGAG  | CCGTTGTAA   | GCGGCAGACT  | TTGCTCATGT  | TACCGATGCT  | ATTCCGGAAG  | 8581  | TCCCGGTATC  | GGTTCATGGA  | TTCGGTTAGA | TGGGAAACCG | CCATCAGTAC  | CAGGTCGTAA  |
| 5401 | ACGGCAACTA  | AGCTGCCGGG  | TTTGAACAC   | GGATGATCTC  | GCGGAGGGTA  | GCATGTTGAT  | 8641  | TCCCAACAC   | TGCCCATGCC  | GGCCGGCCCT | GCGGAAACCT | CTACGTGCCC  | GTCTGGAAGC  |
| 5461 | TGTAACGATG  | ACAGAGCGTT  | GCTGCCTGTG  | ATCCAGATCA  | TGAACAATAA  | AACCTGTCTG  | 8701  | TCGTAGCGGA  | TACCTCGCC   | AGCTCGTCGG | TCACGCTTCG | ACAGACGGAA  | AACGCCACAG  |
| 5521 | TTACATAAAC  | AGTAATACAA  | GGGGTGTTAT  | GAGCCATATT  | CAACGGGAAA  | CGTCTTGCTC  | 8761  | TCCATGATGC  | TGCGACTATC  | GCGGGTGCCC | ACGTCATAGA | GCATCGGAAC  | GAAAAAATCT  |
| 5581 | TAGCCCGCGA  | TTAAATTCCA  | ACATGGATGC  | TGATTATAT   | GGGTATAAAT  | GGGCTCGCGA  | 8821  | GGTTGCTCGT  | CGCCCTTGCG  | CGGCTTCCTA | ATCGACGCGC | CACCGCTCGC  | CGGCGGTTGC  |
| 5641 | TAAATGTCGG  | CAATCAGGTG  | CGACAATCTA  | TCGATTGTAT  | GGGAAGCCCG  | ATGCGCCAGA  | 8881  | CGGGATCTCT  | TGCGGATTCT  | ATCAGCGCGC | GCTTGCCACG | ATTCACCGGG  | CGGTGCTTCT  |
| 5701 | TTGTTTCTTG  | AAACATGCGA  | AGAGTAGCGT  | TGCCAATGAT  | TTTACAGATG  | AGATGGTTCAG | 8941  | GCTCTGATGC  | TTTCCGCTGT  | GCGCGCCTGC | GCGGCTCTCA | ACTTCTCCAC  | CAGGTCATCA  |
| 5761 | ACTAAACTGG  | CTGACGGAAT  | TTATGCTCTC  | TCCGACCATC  | AAGCATTTTA  | TCCGTACTCC  | 9001  | CCCAGCGCGG  | CGCCGATTTG  | TACCGGGCCG | GATGGTTTGC | GACCGTCACG  | CCGATTCTCT  |
| 5821 | TGATGATGCA  | TGGTTACTCA  | CCACTGCGAT  | CCCCGGGAAA  | ACAGCATTTCC | AGGTATTAGA  | 9061  | GGGCTTGGGG  | GTTCAGTGTC  | CATTGCAAGG | CCGCGACAGA | ACCCAGCCCG  | TTACGCGTGG  |
| 5881 | AGAATATCTC  | GATTACGGTG  | AAAATATTGT  | TGATGCGCTG  | CGAGTGTGCC  | TGCGCCGGTT  | 9121  | CCAACCGCCC  | CTCTCTCCAC  | ACATGGGGCA | TTCACGCGCG | TCGGTGCGCT  | GTGTGTTCTG  |
| 5941 | GCATTCGATT  | CCTGTTTGTA  | ATTGTCTCTT  | TAACAGCGAT  | CGCGTATTTC  | GTCTCGCTCA  | 9181  | ATTTTCCATG  | CGCCCTCCTT  | TAGCCGCTAA | AATTATCTA  | CTCATTTTAT  | CATTGCTCTA  |
| 6001 | GGCGCAATCA  | CGAATGAATA  | ACGGTTTGGT  | TGATGCGATG  | GATTTTGTAT  | ACGAGCGTAA  | 9241  | TTTACTCTGG  | TAGCTGCGCG  | ATGTATTAG  | ATAGCAGCTC | GGTAATGGTC  | TTGCCCTTGGC |
| 6061 | TGGCTGGCCT  | GTTGAACAAG  | TCTGGAAGAA  | AATGCATAAA  | ATTTTGGCAT  | TCTCACCAGG  | 9301  | GTACCGCGTA  | CATCTTCACG  | TTGGTGTGAT | CCTCCGCCGG | CAACTGAAAG  | TTGACCCGCT  |
| 6121 | TTCACTGCTC  | ACTCAGTGAT  | ATTTCTCACT  | TGATAACCTT  | CTTTTTCAGC  | AGGGGAAAT   | 9361  | TCATGCTGCG  | CGTGTCTGCC  | AGGCTGGCCA | ACGTTGACAG | CTTGCTGCTG  | CGTGCCTGCG  |
| 6181 | AATAGGTTGT  | ATTGATGTTG  | GACGAGTCGG  | AATCGCAGAC  | CGATACCAGG  | ATCTTGCCAT  | 9421  | GACGCGCCGG  | ACTTAGCGTG  | TTTGTGCTTT | TGCTCATTTT | CTCTTTTACCT | CATTAATCTA  |
| 6241 | CTTATGGAAC  | TGCTTCGGTG  | AGTTTTCTCC  | TTCATTACAG  | AAACGGCTTT  | TTCAAAAAAT  | 9481  | AATGAGTTTT  | GATTTAATTT  | GATTTGATTT | CAGCGGCGAG | CGCTGCCCTC  | CGTGCCTCTC  |
| 6301 | TGGTATTGAT  | TAATCTGATA  | TGAATAAAT   | GCAGTTTACG  | TGATGCTGCG  | ATGAGTTTTT  | 9541  | GGGTTCTGAT  | TCAAGAACGG  | TTGTGCCGCG | GGCGGCGATG | CCTGGGTAGC  | TCACGCGCTG  |
| 6361 | CTAAGAATTA  | ATTCATGATC  | CTGCATGACC  | AAAATCCCTT  | AACGTGAGTT  | TTGTTTCCAC  | 9601  | CGTGATACGC  | GATCTCAAGAA | TGGGCGAGTC | GTACCCGCGC | AGCGCCTCGT  | CAACTCACCC  |
| 6421 | TGAGCGTACG  | ACCCCGTAGA  | AAAGATCAAA  | GGATCTTCTT  | GAGATCTCTT  | TTTTCTGCGC  | 9661  | GCCGATGCGC  | GTGCTTTTGA  | TCGCCCCGTA | CACGACAAAG | CGCGCTTGTA  | GACCTTCCAT  |
| 6481 | GTAATCTGCT  | GCTTCAAAAC  | AAAAAAACAA  | CCGCTTACCAG | CGGTGGTTTG  | TTTGCCGGAT  | 9721  | CGTGACCTCA  | ATGCGCTGCT  | TAACCAAGTC | CACCAGGTCG | GCGGTGGCCC  | ATATGTCGTA  |
| 6541 | CAAGAGCTAC  | CAACTCTTTT  | TCCGAAGGTA  | ACTGGCTTCA  | GCAGAGCGCA  | GATACCAAAAT | 9781  | AGGGCTTGGC  | TGCAACCGGAA | TACGACGAA  | GTCCGCTGCC | TTGATCGCGG  | ACACAGCCAA  |
| 6601 | ACTGCTCTTC  | TAGTGATGCC  | TAGTTAGGCG  | CACCACTCTG  | AGAACTCTGT  | AGCAGCGCCT  | 9841  | GTCCGCGCCC  | TGGGCGCTCT  | CGTGCATCAC | TACGAAAGTC | CGCCGCGCGA  | TGGCTTCCAT  |
| 6661 | ACATAGCTCG  | CTCTGTAACT  | CCTGTTTACC  | GTGGCTGCTG  | CCAGTGGCGA  | TAAGTCTGTG  | 9901  | GTCCGCGTCA  | ATCGTCGGGC  | GGTCGATGCC | GACAACGGTT | AGCGGTTGAT  | CTTCCCGCAC  |
| 6721 | CTTACCGGGT  | TGGACTCAAG  | ACGATAGTTA  | CCGGATAAGG  | CGCAGCGGTC  | GGGCTGAACG  | 9961  | GGCCGCCCAA  | TCGCGGGGAC  | TGCCCTGGGG | ATCGGAATCG | ACTAACAGAA  | CATCGGCCCC  |
| 6781 | GGGGGTTCTG  | GCACACAGCC  | CAGCTTGAG   | CGAAGCAGCT  | ACACCGAACT  | GAGATACCTA  | 10021 | GCGGAGTTTG  | AGGGCGCGGG  | CTAGATGGGT | TGCGATGGTC | GTCTTGCCCTG | ACCCGCCCTT  |
| 6841 | CAGCGTGAGC  | TATGAGAAAG  | CGCCACGCTT  | CCCGAAGGGA  | GAAAGGCGGA  | CAGGTATCCG  | 10081 | CTGGTTAAGT  | ACAGCGATAA  | CCTTCATGCG | TTCCCTTTGC | GTATTTGTTT  | ATTTACTCAT  |
| 6901 | GTAAGCGGCA  | GGGTCGGAAC  | AGGAGAGCGC  | ACGAGGGAGC  | TTCAGGGGGG  | AAACGCTTGG  | 10141 | CGCATATCAT  | ACGACGACGC  | CGCATGACGC | AAGCTGTTT  | ACTCAAAATC  | ACATCACCTT  |
| 6961 | TATCTTTATA  | GTCCTGTGCG  | GTTTCGCCAC  | CTCTGACTTG  | AGCGTCGATT  | TTTGTGATGC  | 10201 | TTTAGACGGC  | GGCGCTCGGT  | TTCTTCAGCG | GCCAAAGTGG | CTCCGACAGC  | CGCCACCTTG  |
| 7021 | CTGTCAGGGG  | GGCGGAGCCT  | ATGGA AAAAC | GCCAGCAACG  | CGGCCCTTTT  | ACGGTTCTCTG | 10261 | GCATCAGACA  | AACCGGCCAG  | GATTTTCATG | AGCCGACAGG | TTGAGACGTG  | CGCGGCGGCG  |
| 7081 | GCCTTTTGGT  | GGCCTTTTGC  | TCACATGTTT  | TTTCTGCGGT  | TATCCCTGTA  | TTCTGTGGAT  | 10321 | TCGAACACGT  | ACCCGCGCGC  | GATCATCTCC | GCCTCGATCT | CTTCGGTAAAT | GAAAAACGGT  |
| 7141 | AACCGTATTA  | CCGCCCTTGA  | GTGAGCTGAT  | ACCGCTCGCC  | GCAGCCGAAC  | GACCGAGCGC  | 10381 | TCGTCCTGCT  | CGTCTGTTGT  | CGGTTTTCAT | CTTGTTCTCT | TTGGCGTTTA  | TTCTCGGCGT  |
| 7201 | AGCGAGCTAG  | TGAGCGGAGA  | AGCGGAAGAG  | CGCCTGATGC  | GGTATTTTCT  | CCTTAGCAGT  | 10441 | CCGCGAGGCG  | GTCCGCGCTG  | GTCAATGCGT | CCTACGCGAA | GGCAGCCGCG  | CGCTGGCGCT  |
| 7261 | CTGTGCGGTA  | TTTCAACCG   | CATATGGTGC  | ACTCTCAGTA  | CAATCTGCTG  | TGATGCCGCA  | 10501 | CGGTGGGCGT  | CACCTTCTCG  | CTGCGCTCAA | GTGCGCGGTA | CAGGTCGAG   | CGATGCACGC  |
| 7321 | TAGTTAAGCC  | AGTATACACT  | CCGCTATCGC  | TACGTGACTG  | GGTCATGGCT  | GCGCCCCGAC  | 10561 | CAAGCAGTGC  | AGCCGCTCTT  | TTACCGGTGC | GGCCTTCTGT | GTGATCAGC   | TCCGCGGCGT  |
| 7381 | ACCCGCAAC   | ACCCGCTGAC  | GCGCCCTGAC  | GGGCTTGTCT  | GCTCCCGGCA  | TCCGCTTACA  | 10621 | GCGCGATCTG  | TGCGCGGGTG  | AGGGTAGGGC | GGGGGCCAAA | CTTACGCGCT  | CGGCGCTTGG  |
| 7441 | GACAAGCTGT  | GACCGTCTGC  | GGGAGCTGAC  | TGTGTACAGG  | GTTTTCACCG  | TCATCACCAG  | 10681 | CGGCCCTCGG  | CCCGCTCCGG  | GTGCGGTGCA | TGATTAGGGA | ACGCTCGAAC  | TCCGCAATGC  |
| 7501 | AACGCGCGAG  | GACGGGTGCC  | TTGATGTGGG  | GCGCGGCGGT  | CGAGTGCGCA  | CGATCGCGCT  | 10741 | CGGCGAACAC  | GGTCAACAC   | ATGCGCGCGC | CCGCGCTGGT | GGGTCTCGGC  | CACGCGCTCT  |
| 7561 | TGTCGCGGCC  | CTGTGATGAT  | GCCTGGCCGT  | AGGCCAGCCA  | TTTTTGAGCG  | GCCAGCGGCC  | 10801 | CAAGGCTACG  | CAGCGGCGCG  | CGCGCTCTCT | CGCGCTGCTG | GGCAATGTTC  | AGTAGGTGCG  |
| 7621 | GCGTATAGCC  | GACCGCAAGC  | GGCGGGGCGT  | AGGGAGCGCA  | GCGACCGAAG  | GGTAGGCGCT  | 10861 | GGGTGCTGCG  | GGCCAGGCGG  | TCTAGCCTGG | TCATGTCTAC | AACGTCGCCA  | GGGCGTAGGT  |
| 7681 | TTTTTGCAGC  | CTTCGGCTGT  | GCGCTGGCCA  | GCGAGGCTAG  | CACAGCGGAG  | CGGAGGTTTTA | 10921 | GGTCAAGCAT  | CCTGGCCACG  | TCCGGGCGGT | CGCGCCGTGT | GCCGGTGATC  | TTCTCGGAAA  |
| 7741 | AGAGTTTTTAA | TAAAGTTTTAA | AGAGTTTTTAG | GCGGAAAAAT  | CGCCTTTTTT  | CTCTTTTATA  | 10981 | ACAGGTTTGT  | GACGCGCGCG  | CGCGTGAGTT | CGGCGCTTGG | TTTGGTCAAG  | TCCTGGTCAAG |
| 7801 | TCAGTCACTT  | ACATGTGTGA  | CCGGTTTCCA  | ATGTACGGCT  | TTGGGTTTCCC | AATGTACGGG  | 11041 | CGGTGCTGAC  | GCGGGCATAG  | CCCAGCAGGC | CAGCGGCGGC | GCTCTGTGTC  | ATGGCGTAAT  |
| 7861 | TTTCCGGTTCC | CAATGTACGG  | CTTTGGGTTT  | CCAATGTACG  | TGCTATCCAC  | AGGAAAGAGA  | 11101 | GTCTCCGGTT  | TGATGCGCAA  | GTATTCTACT | TTATGCGACT | AAAAACACGC  | ACAAGAAAAA  |
| 7921 | CCTTTTTCGAC | CTTTTTCGCC  | TGCTAGGGCA  | ATTTGCCCTA  | GCATCTGCTC  | CGTACATTAG  | 11161 | GTCAGGAAAA  | GAGGAGGCGG  | GCAGCCTGTG | CGCTAAGTTA | GGACTTGTGC  | GACATGTGCT  |
| 7981 | GAACCGGCGG  | ATGCTTCGCC  | CTCGATCAGG  | TTGCGGTAGC  | GCATGACTAG  | GATCGGGCCA  | 11221 | TTTCAAGAAG  | CGGCTGCACT  | GAACGTCAGA | AGCCGACTGC | ACTATAGCAG  | CGGAGGGGTT  |
|      |             |             |             |             |             |             | 11281 | GGATCAAAAG  | ACT         |            |            |             |             |

**Supplemental Figure S7.** F-SHMT08cΔ+H218A-CDS, insert size, vector, restriction enzymes, and sequenced positive clones used for cloning.

## Cloning Sites Ascl-AvrII

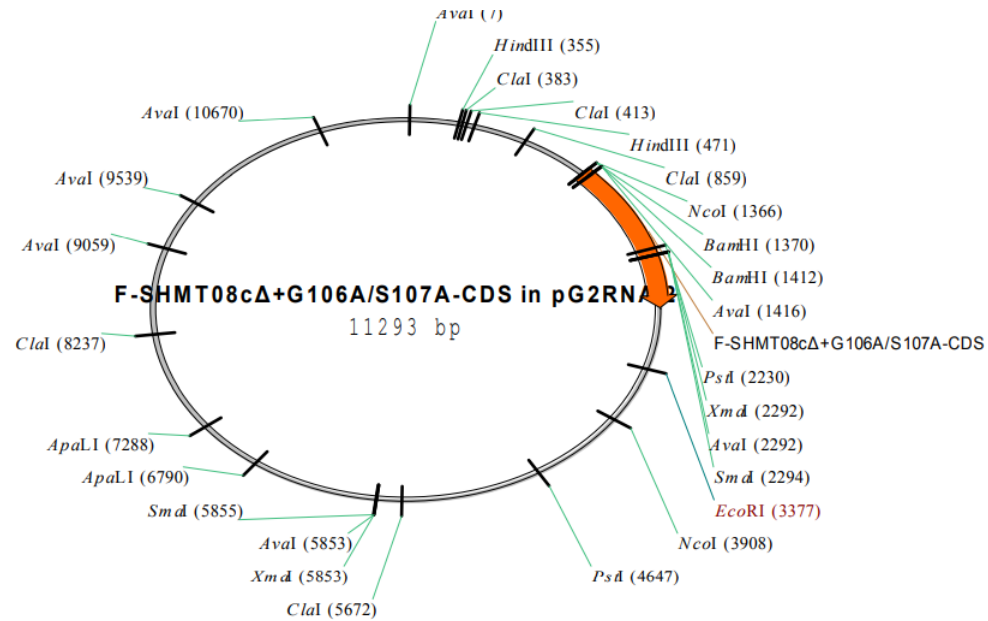

**Supplemental Figure S8.** F-SHMT08cΔ+G106A/S107A-CDS, insert size, vector, restriction enzymes, and sequenced positive clones used for cloning.

### Detailed Sequence of the Whole Construct:

```
1  TTGATCCCGA GGGGAACCCT GTGGTTGGCA TGCACATACA AATGGACGAA CGGATAAACCC
61  TTTTCACGCC CTTTAAATA TCCGTTATTC TAATAAACGC TCTTTTCTCT TAGGTTTACC
121 CGCCAATATA TCCTGTCAA CACTGATAGT TTAAACTGAA GGCGGGAAAC GACAATCTGA
181 TCCAAGCTCA AGCTCATTCT CCATTACAGC TGCAGCACTG TTGGGAAGGG CGATCGGTGC
241 GGGCCTCTTC GCTATTACGC CAGCTGGCGA AAGGGGGATG TGCTGCAAGG CGATTAAAGTT
301 CGCTAACCCC ACCCTTTTCC CACTCACCAC CTTCTAAAAC CACGCCCCACT CCCAACCTTA
361 TTACCCTGTT ATCCCTAGAT ATCGATTTTG GCTACCTTAA GGTAGCCAAA ATCGATCACT
421 AGTGC GGCCG CGGGCCCAAT ATAACAACGA CGTCGTAACA GATAAAGCGA AGCTTGAAGG
481 TGCATGTGAC TCCGTCAAGA TTACGAAACC GCCAACTACC ACGCAAATTG CAATTCTCAA
541 TTTCTAGAA GGACTCTCCG AAAATGCATC CAATACCAA TATTACCCGT GTCATAGGCA
601 CCAAGTGACA CCATACATGA ACACGCGTCA CAATATGACT GGAGAAGGGT TCCACACCTT
661 ATGCTATAAA ACGCCCCACA CCCCTCTCC TCCCTTCGCA GTTCAATTCC AATATATTCC
721 ATTCTCTCTG TGTATTTCCC TACCTCTCCC TTCAAGTTA GTCGATTTCT TCTGTTTTTC
781 TTCTTCGTTT TTTCCATGAA TTGTGTATGT TCTTGATCA ATACGATGTT GATTTGATTG
841 TGTTTTGTTT GGTTTCATCG ATCTTCAATT TTCATAATCA GATTCAGCTT TTATTATCTT
901 TACAACAACG TCCTTAATTT GATGATTCTT TAATCGTAGA TTTGCTCTAA TTAGAGCTTT
961 TTCATGTCAG ATCCCTTTAC AACAAGCCTT AATTGTTGAT TCATTAATCG TAGATTAGGG
1021 CTTTTTTCAT TGATTACTTC AGATCCGTTA AACGTAACCA TAGATCAGGG CTTTTTCATG
1081 AATTACTTCA GATCCGTTAA ACAACAGCCT TATTTTTTAT ACTTCTGTGG TTTTCAAGA
1141 AATCGTTCAG ATCCGTTGAC AAAAAGCCTT ATTCGTTGAT TCTATATCGT TTTTCGAGAG
1201 ATATTGCTCA GATCTGTTAG CAACTGCCTT GTTTGTTGAT TCTATTGCCG TGGATTAGGG
1261 TTTTTTTTCA CGAGATTGCT TCAGATCCGT ACTTAAGATT ACGTAATGGA TTTTGATTCT
1321 GATTTATCTG TGATTGTTGA CTCGACAGCG GCCGCACCGG CGCGCCATGG ATCCAGTAAG
1381 CGTGTGGGGT AACACGCCCT TGGCGACGGT GGATCCCGAG ATCCATGACC TCATCGAGAA
1441 GGAGAAGCGC CGTCAATGCC GCGGAATCGA GTCATCGCC TCCGAGAACT TCACCTCCTT
1501 CGCCGTCATC GAGGCCCTCG GCAGCGCTCT CACGAACAAA TACTCCGAGG GCATGCCGGG
1561 CAACCGCTAC TACGGCGGCA ATGAATACAT CGACCAGATC GAAAACCTCT GCCGCTCACG
1621 CGCCCTCCAA GCCTTCCACC TCGACGCCCA ATCCTGGGGC GTCAACGTCC AGCCCTACTC
1681 CGCTGCTCCG GCCAACTTCG CCGCCTACAC CGCCGTCCTC AACCCCCACG ACCGCATCAT
1741 GGGGCTAGAT CTCCGCTCCG GCGGCCACCT CACCCACGGC TACTACACCT CCGGCGGAAA
```

|      |            |            |             |            |             |            |
|------|------------|------------|-------------|------------|-------------|------------|
| 1801 | GAAGATCTCC | GCCACCTCCA | TTTACTTCGA  | GAGTCTCCCT | TACAAGGTAA  | ACTCCACCAC |
| 1861 | CGGCTACATC | GACTACGACC | GCTTGGAAGA  | AAAAGCCCTA | GACTTCAGGC  | CAAAACTCAT |
| 1921 | AATCTGCGGT | GGCAGCGCGT | ACCCTCGCGA  | TTGGGACTAC | AAACGTTTCA  | GGGAAGTCGC |
| 1981 | TGATAAGTGC | GGAGCATTGC | TTCTCTGCGA  | CATGGCGCAC | ACTAGCGGCC  | TTGTGGCCGC |
| 2041 | GCAGGAAGTG | AACAGCCCTT | TCGAGTATTG  | CGACATTGTG | ACCACCACGA  | CTCACAAGAG |
| 2101 | CTTGCGGGGC | CCACGTGCGG | GGATGATCTT  | TTACCGGAAG | GGCCCCAAGC  | CGCCGAAGAA |
| 2161 | GGGGCAGCCG | GAGAACGCGG | TTTATGATTT  | CGAGGACAAG | ATTAACCTCG  | CGGTGTTCCC |
| 2221 | TTGCTGTCAG | GGTGGGCCCC | ACAACCACCA  | GATCGGTGCT | CTCGCCGTGG  | CGCTGAAGCA |
| 2281 | GGCCGCGTCG | CCCGGGTTTA | AGGCCTACGC  | GAAGCAGGTT | AAGCGCAACG  | CCGTTGCGCT |
| 2341 | TGGAAAATAC | TTGATGGGGA | AAGGGTACAG  | CCTTGTCACT | GGCGGAACGG  | AGAACCATCT |
| 2401 | TGTTTTGTGG | GATCTGAGAC | CTCTTGATT   | GACTGGGTAT | AAGGTGGAGA  | AACCTGTGTA |
| 2461 | TCTCTGTAAC | ATTACTGTGA | ACAAGAACGC  | TGTTTTTGGT | GATAGCAGTG  | CCTTGGCCCC |
| 2521 | TGGTGGAGTG | CGAATTGGTG | CCCCTGCCAT  | GACTTCTAGG | GGTTTGGTTG  | AAAAAGACTT |
| 2581 | TGAGCAGATT | GGTGAGTTCC | TTCACCGTGC  | TGTGACTCTC | ACACTGGAGA  | TCCAGAAGGA |
| 2641 | GCATGGCAAA | CTTCTCAAGG | ATTTCAACAA  | GGGTCTCGTC | AACAACAAGG  | CTATTGAAGA |
| 2701 | TCTCAAAGCT | GATGTTGAGA | AGTTCTCTGC  | CTTGTTTGAC | ATGCCTGGCT  | TCCTGGTATC |
| 2761 | TGAAATGAAG | TACAAGGATT | AGCCTAGGTT  | CGAGTATTAT | GGCATTGGGA  | AAACTGTTTT |
| 2821 | TCTTGTACCA | TTTGTGTGTC | TTGTAATTTA  | CTGTGTTTTT | TATTCGGTTT  | TCGCTATCGA |
| 2881 | ACTGTGAAAT | GGAAATGGAT | GGAGAAGAGT  | TAATGAATGA | TATGGTCCTT  | TTGTTTCATC |
| 2941 | TCAAATTAAT | ATTATTTGTT | TTTTCTCTTA  | TTTGTGTGTG | GTTGAATTTG  | AAATTATAAG |
| 3001 | AGATATGCAA | ACATTTTGTT | TTGAGTAAAA  | ATGTGTCAAA | TCGTGGCCTC  | TAATGACCGA |
| 3061 | AGTTAATATG | AGGAGTAAAA | CACTTGTAAGT | TGTACCATTA | TGCTTATTCA  | CTAGGCAACA |
| 3121 | AATATATTTT | CAGACCTAGA | AAAGCTGCAA  | ATGTTACTGA | ATACAAGTAT  | GTCTCTTGT  |
| 3181 | GTTTTAGACA | TTTATGAACT | TTCCTTTATG  | TAATTTTCCA | GAATCCTTGT  | CAGATTCTAA |
| 3241 | TCATTGCTTT | ATAATTATAG | TTATACTCAT  | GGATTGTAGT | TTGAGTATGA  | AAATATTTTT |
| 3301 | TAATGCATTT | TATGACTTGC | CAATTGATTG  | ACAACATGCA | TCAATCCGCG  | GTTATGACTC |
| 3361 | TCTTAAGAGA | GTCATGAATT | CGAGCTTCCA  | GAAGGTAATT | ATCCAAGATG  | TAGCATCAAG |
| 3421 | AATCCAATGT | TTACGGGAAA | AACATATGGA  | GTATTATGTG | AGCTCAGCAA  | GAAGCAGATC |
| 3481 | AATATGCGGC | ACATATGCAA | CCTATGTTCA  | AAAATGAAGA | ATGTACAGAT  | ACAAGATCCT |
| 3541 | ATACTGCCAG | AATACGAAGA | AGAATACGTA  | GAAATTGAAA | AAGAAGAACC  | AGGCGAAGAA |
| 3601 | AAGAATCTTG | AAGACGTAAG | CACTGACGAC  | AACAATGAAA | AGAAGAAGAT  | AAGGTCGGTG |
| 3661 | ATTGTGAAAG | AGACATAGAG | GACACATGTA  | AGGTGGAATA | TGTAAGGGCG  | GAAAGTAACC |
| 3721 | TTATCACAAA | GGAATCTTAT | CCCCCACTAC  | TTATCCTTTT | ATATTTTTTCC | GTGTCATTTT |
| 3781 | TGCCCTTGAG | TTTTCCTATA | TAAGGAACCA  | AGTTCGGCAT | TTGTGAAAAC  | AAGAAAAAAT |
| 3841 | TTGGTGTAAG | CTATTTTCTT | TGAAGTACTG  | AGGATACAAC | TTCAGAGAAA  | TTTGTAAGTT |
| 3901 | TGTGATCCAT | GGTGAGCAAG | GGCGAGGAGC  | TGTTCAACCG | GGTGGTGCCC  | ATCCTGGTCG |
| 3961 | AGCTGGACGG | CGACGTAAAC | GGCCACAAGT  | TCAGCGTGTC | CGGCGAGGGC  | GAGGGCGATG |
| 4021 | CCACCTACGG | CAAGCTGACC | CTGAAGTTCA  | TCTGCACCAC | CGGCAAGCTG  | CCCGTGCCCT |
| 4081 | GGCCACCCCT | CGTGACCACC | TTCACCTACG  | GCGTGACATG | CTTCAGCCGC  | TACCCCGACC |
| 4141 | ACATGAAGCA | GCACGACTTC | TTCAGTCCG   | CCATGCCCGA | AGGCTACGTC  | CAGGAGCGCA |
| 4201 | CCATCTTCTT | CAAGGACGAC | GGCAACTACA  | AGACCCGCGC | CGAGGTGAAG  | TTCGAGGGCG |
| 4261 | ACACCCTGGT | GAACCGCATC | GAGCTGAAGG  | GCATCGACTT | CAAGGAGGAC  | GGCAACATCC |
| 4321 | TGGGGCACAA | GCTGGAGTAC | AACTACAACA  | GCCACAACGT | CTATATCATG  | GCCGACAAGC |
| 4381 | AGAAGAACGG | CATCAAGGTG | AACCTCAAGA  | TCCGCCACAA | CATCGAGGAC  | GGCAGCGTGC |
| 4441 | AGCTCGCCGA | CCACTACCAG | CAGAACACCC  | CCATCGGCGA | CGGCCCCGTG  | CTGCTGCCCG |
| 4501 | ACAACCACTA | CCTGAGCACC | CAGTCCGCCC  | TGAGCAAAGA | CCCCAACGAG  | AAGCGCGATC |
| 4561 | ACATGGTCCT | GCTGGAGTTC | GTGACCGCCG  | CCGGGATCAC | TCACGGCATG  | GACGAGCTGT |
| 4621 | ACAAGTAAAG | CGGCCGCGCG | GCTGCAGATC  | GTTCAACAT  | TTGGCAATAA  | AGTTTCTTAA |
| 4681 | GATTGAATCC | TGTTGCCGGT | CTTGCGATGA  | TTATCATATA | ATTTCTGTTG  | AATTACGTTA |
| 4741 | AGCATGTAAT | AATTAACATG | TAATGCATGA  | CGTTATTTAT | GAGATGGGTT  | TTTATGATTA |
| 4801 | GAGTCCCGCA | ATTATACATT | TAATACGCGA  | TAGAAAACAA | AATATAGCGC  | GCAAACTAGG |
| 4861 | ATAAATTATC | GCGCGCGGTG | TCATCTATGT  | TACTAGATCC | GATGATAAGC  | TGTCAAACAT |
| 4921 | GAGAATTAAT | TCGTAATCAT | GTCATAGCTG  | TTTCTGTGTG | GAAATTGTGA  | TCCGCTCACA |
| 4981 | ATTCCACACA | ACATACGAGC | CGGAAGCATA  | AAGTGTAAG  | CCTGGGGTGC  | CTAATGAGTG |

**Supplemental Figure S8.** F-SHMT08cΔ+G106A/S107A-CDS, insert size, vector, restriction enzymes, and sequenced positive clones used for cloning.

|      |            |             |             |            |             |             |       |             |             |            |            |             |             |
|------|------------|-------------|-------------|------------|-------------|-------------|-------|-------------|-------------|------------|------------|-------------|-------------|
| 5041 | AGCTAACTCA | CATTAATTGC  | GTTGCGCTCA  | CTGCCCGCTT | TCCAGTCGGG  | AAACCTGTGC  | 5281  | TTGCTTTCTG  | TGATCTCGCG  | GTACATCCAA | TCAGCTAGCT | CGATCTCGAT  | GTACTCCGGC  |
| 5101 | TGCCAGCTGC | ATTAATGAAT  | CGGCCAACGC  | CGCGGGAGAG | GCGGTTTGCG  | TATTGGCTAG  | 8341  | CGCCCGGTTT  | CGCTCTTTAC  | GATCTTGTAG | CGGCTAATCA | AGGCTTCACC  | CTCGGATACC  |
| 5161 | AGCAATTCGG | CGTTAATFCA  | GCATATAAA   | AACGTCGCCA | ATGTTGTTAT  | AAGTGTCTCA  | 8401  | GTCACACAGC  | GGCCGTTCTT  | GGCCTTCTTC | GTACGCTGCA | TGGCAACGTC  | CGTGGGTGTT  |
| 5221 | AGCGTCAATT | TGTTTACACC  | ACATATATC   | CTGCCACACG | CACGCCAAAC  | GCTCCCGCAC  | 8461  | AACCGAATGC  | AGGTTTCTAC  | CAGGTCTGCT | TTCTGCTTTC | CGCCATCGGC  | TCCCGGCGAG  |
| 5281 | CGGCAGCTCG | GCACAAAATC  | ACCACTCGAT  | ACAGGCAGCC | CATCAGTCCG  | GGACGGCGTC  | 8521  | AACTTTAGTA  | CGTCCGCAAC  | GTTGTGGACG | AACACGGCGG | CGGGCTTGTC  | TCGCTTCCCT  |
| 5341 | AGCGGGAGAG | CCGTTGTAA   | GCGGCAGACT  | TTGCTCATGT | TACCGATGCT  | ATTTCGGAAG  | 8581  | TCCCGGTATC  | GGTTCATGGA  | TTCGGTTAGA | TGGGAAACCG | CCATCAGTAC  | CAGGTCTGTA  |
| 5401 | ACGGCAACTA | AGCTGCCGGG  | TTTGAACAC   | GGATGATCTC | GCGGAGGGTA  | GCATGTTGAT  | 8641  | TCCACACAC   | TGGCCATGCC  | GGCCGGCCCT | GCGGAAACCT | CTACGTGCC   | GTCTGGAAG   |
| 5461 | TGTAACGATG | ACAGAGCGTT  | GCTGCTGTG   | ATCCAGATCA | TGAACAATAA  | ACTGTCTGTC  | 8701  | TCGTAGCGGA  | TCACCTCGCC  | AGCTCGTCGG | TACAGCTTTC | ACAGACGGAA  | AACGGCCACG  |
| 5521 | TTACATAAAC | AGTAATACAA  | GGGGTGTTAT  | GAGCCATATT | CAACGGGAAA  | CGTCTTGCTC  | 8761  | TCCATGATGC  | TGCGACTATC  | CGGGGTGCC  | ACGTATAGA  | GCATCGGAA   | AAAAAATCT   |
| 5581 | TAGGCCCGCA | TTAAATTC    | ACATGGATGC  | TGATTTATAT | GGGTATAAAT  | GGGCTCGCGA  | 8821  | GGTTGCTCGT  | CGCCCTTGGG  | CGGCTTCCTA | ATCGACGGCG | CACCGGCTGC  | CGGCGGTTGC  |
| 5641 | TAAATGTGGG | GCATCAGGTG  | CGACAATCTA  | TCGATTGTAT | GGGAAGCCCG  | ATGCGCCAGA  | 8881  | CGGGATTCTT  | TGCGGATTTC  | ATCAGCGGCC | GCTTGCCACG | ATTACCCGGG  | CGGTGCTTCT  |
| 5701 | GTTGTTTCTG | AAACATGGCA  | AAGGTAGCGT  | TGCCAATGAT | GTTACAGATG  | AGATGGTCAG  | 8941  | GCCTCGATGC  | GTTGCGGCTG  | GGCGGCTCTC | GCGGCCTTCA | ACTTCTCCAC  | CAGGTACATCA |
| 5761 | ACTAAATCGG | CTGACGGAA   | TTATGCCTCT  | TCCCGACCAT | AAGCATTTTA  | TCCGTA      | 9001  | CCCAGCGCCG  | CGCCGATTTC  | TACCGGGCCG | GATGGTTTGC | GACCGTACG   | CCGATTCTCT  |
| 5821 | TGATGATGCA | TGGTTACTCA  | CCACTGCGAT  | CCCCGGGAAA | ACAGCATTTCC | AGGTATTAGA  | 9061  | GGGCTTGGGG  | GTTCCAGTGC  | CATTGACAGG | CCGGCAGACA | ACCCAGCCCG  | TTACGCTTGG  |
| 5881 | AGAATATCCT | GATTCAGGTG  | AAAATATTGT  | TGATGCGCTG | GCAGTGTTC   | TGCGCCGGTT  | 9121  | CCAAACCCCG  | GTTCCCTCCAC | ACATGGGGCA | TTCCACGGCG | TCGGTGCCCTG | GTTGTTCTTG  |
| 5941 | GCATTCGATT | CCTGTTTGTA  | ATTGTCCTTT  | TAACAGCGAT | CGCGTATTTC  | GTCCTCGCTCA | 9181  | ATTTTCCCATG | CGCCCTCCTT  | TAGCCGCTAA | ATTTATCTA  | ACTTCTTATT  | GATTTGCTCA  |
| 6001 | GCGCAATCA  | CGAATGAATA  | ACGCTTTGGT  | TGATGCGAGT | GATTTTGTAT  | ACGAGCGTAA  | 9241  | TTTACTCTGG  | TAGCTGCGCG  | ATGTATTAG  | ATAGCAGCTC | GGTAATGGTC  | TTGCCCTTGG  |
| 6061 | TGGCTGGCCT | GTTGAACAAG  | TCTGGAAAGA  | AATGCATAAA | CTTTTGCCAT  | TCTCACCGGA  | 9301  | GTACCGCGTA  | CATCTTCAGC  | TTGGTGTGAT | CCTCCGCGCG | CAACTGAAAG  | TTGACCCGCT  |
| 6121 | TTACAGTCGT | ACTCATGGTG  | ATTCTCTACT  | TGATAACCTT | ATTTTGTAGC  | AGGGGAAAT   | 9361  | TCATGGCTG   | CGTGTCTGCG  | AGGCTGGCCA | ACGTGTCAGC | CTTGCTGCTG  | CGTGCGCTCG  |
| 6181 | AATAGGTTGT | ATTGATGTTG  | GACGAGTCGG  | AATCGCAGAC | CGATAACAGG  | ATCTTGCCAT  | 9421  | GACCGCCGCG  | ACTTAGCGTG  | TTTGTGCTTT | TGCTCATTTT | CTCTTACCT   | CATTAGCTCA  |
| 6241 | CCTATGGAAG | TGCTCGGTG   | AGTTTCTTCC  | TTCATTACAG | AACACGGCTT  | TTCAAAAATA  | 9481  | AATGAGTTTT  | GATTTAATTT  | CAGCGGCCAG | CGCCTGGACC | TCGCGGGCAG  | CGTCGCCCTC  |
| 6301 | TGGTATTGAT | AATCCTGATA  | TGAATAAAT   | GCAGTTTCA  | TTGATGCTCG  | ATGAGTTTTT  | 9541  | GGGTCTGAT   | TCAAGAACGG  | TTGTGCCGCG | GCGCGCAGTG | CTCGGGTAGC  | TCACGCGCTG  |
| 6361 | CTAAGAATTA | ATTCATGATC  | CTGCATGACC  | AAAAATCCCT | AACGTGAGTT  | TTCTTGCCAC  | 9601  | CGTGATACGG  | GATCAAGAA   | TGGGCAGCTC | GTACCCGGCC | AGCGCTCCG   | CAACCTCAC   |
| 6421 | TGAGCGTCA  | ACCCGCTAGA  | AAAGATCAAA  | GGATCTTCTT | GGATCTTCTT  | TTTCTGCGC   | 9661  | GCCGATGCGC  | GTCCTTTTGA  | TGCCCCGCGA | CACGACAAAG | CGCGCTTGTA  | GCCTTCCATC  |
| 6481 | GTAATCTGCT | GCTTGCAAA   | AAAAAAACCA  | CCGCTACCAG | CGGTGGTTTG  | TTTGCCGGAT  | 9721  | CGTGACCTCA  | ATGCGCTGCT  | TAACAGCTC  | CACCAAGTCT | GCGGTGGCCC  | ATATGTCGTA  |
| 6541 | CAAGAGCTAC | CAACTCTTTT  | TCCGAAGGTA  | ACTGGCTTCA | CGAGAGCGCA  | GATACCAAAT  | 9781  | AGGGCTTGCG  | TGACACGGAA  | GTCCGCTGCC | TGTATCGCGC | ACACAGCCAA  | CGTGGCTTCA  |
| 6601 | ACTGTCCTTC | TAGTTAGGCC  | GTAGTTAGGC  | CACCACTTCA | AGAACTCTGT  | AGACCCGCTC  | 9841  | GTCCGCGCGC  | TGGGGCGCTC  | CGTGCATCAC | TACGAAGTCT | CGCGCCGGA   | TGGCTTCTAC  |
| 6661 | ACATACCTCG | CTCTGCTAAT  | CCTGTTACCA  | GTGGCTGCTG | CCAGTGCGCA  | TAAAGTCGTG  | 9901  | GTCGCGGTCA  | ATCGTCCGGC  | GGTCGATGCC | GACAACGGTT | AGCGGTTGAT  | CTTCCCGCAC  |
| 6721 | CTTACC     | TGGACTCAAG  | ACGATAGTTA  | CCGGATAAGG | CGCAGCGGTC  | GGGCTGAACG  | 9961  | GGCCGCCCAA  | TCGCGGGCAC  | TGCCCTGGGG | ATCGGAATCG | ACTAACAGAA  | CATCGGCCCC  |
| 6781 | GGGGGTTCTG | GATACACAGC  | CAGCTTGGAG  | CGAACGACCT | ACACCGAAT   | GAGATACCTA  | 10021 | GGCGAGTTGC  | AGGGCGCGGG  | CTAGATGGGT | TGCGATGGTC | GTCTTGCCCTG | ACCCGCTTTT  |
| 6841 | CAGCGTGAGC | TATGAGAAAG  | CGCCAGCGTT  | CCCGAAGGGA | GACAGCGCGA  | AGGTTATCCG  | 10081 | CTGGTTAAGT  | ACAGCGATAA  | CCTTCATGCG | TTCCCTTTGC | GTATTTGTTT  | ATTTACTCAT  |
| 6901 | GTAAGCGGCA | GGGTCCGAAC  | AGGAGAGCGC  | ACGAGGGAGC | TTCAGGGGGG  | AAACGCTTGG  | 10141 | CGCATCATAT  | ACGCAGCGAC  | CGCATGACGC | AAGCTGTTTT | ACTCAAATAC  | ACATCACCTT  |
| 6961 | TATCTTTATA | GTCCTGTGCG  | GTTTCGCCAC  | CTCTGACTTG | AGCGTCGATT  | TTTGTGATGC  | 10201 | TTTAGACGGC  | GGCGCTCGGT  | TTCTTCAGCG | GCCAAGCTGG | CCGGCCAGGC  | CGCCAGCTTG  |
| 7021 | TCGTACAGGG | GCGCGAGGCT  | ATGGAATAAC  | GCCAGCAACG | CGGCTTTTTT  | ACGCTTCTTG  | 10261 | GCATCAGACA  | AACCGGCCAG  | GATTTTCATG | AGCCGCACGG | TTGAGACGTG  | CGCGGGCGCG  |
| 7081 | GCCTTTTGCT | GGCCTTTTGC  | TCACATGTTT  | TTTCTGCGT  | TATCCCTTGA  | TTCTGTGGAT  | 10321 | TCGAACACGT  | ACCCGGCCGC  | GATCATCTCC | CCCTCGATCT | CTTCGGTAAT  | GAATAACGGT  |
| 7141 | AACCGTATTA | CGCCCTTTGA  | GTGAGCTGAT  | ACCGCTCGCC | GCAGCCGAAC  | GACCCGAGCG  | 10381 | TCGTCTTGGC  | CGTCTTGGTG  | CGGTTTCATG | CTTGTTCTCT | TTGGCGTTCA  | TTCTCGGCGG  |
| 7201 | AGCGAGTCA  | TGAGCGAGGA  | AGCGGAAGAG  | CGCCTGATGC | GGTATTTTCT  | CCTTACGCAT  | 10441 | CCGCCAGGGC  | GTCGCGCTCG  | GTCAATGCGT | CCTACGGAA  | GGCACCGCGC  | CGCCTGGCCT  |
| 7261 | CTGTGCGGTA | TTTCACACCG  | CATATGGTGC  | ACTCTCAGTA | CAATCTGCTC  | TGATGCCGCA  | 10501 | CGGTGGCGGT  | CACCTCTCTC  | CTCGCTCAA  | GTCGCGGGTA | CAGGTCTCAG  | CGATGCACGC  |
| 7321 | TAGTTAAGCC | AGTATACACT  | CCGCTATCGC  | TACGTGACTG | GGTCATGGCT  | GCGCCCCGAC  | 10561 | CACAGAGTGC  | AGCGCCCTCT  | TTACGGGTGC | GGCCTTCTTG | TCGTCAGCTC  | TCGCGGCGGT  |
| 7381 | ACCCGCCAAC | ACCCGCTGAC  | GCGCCCTGAC  | GGGCTTGTCT | GCTCCCGGCA  | TCCGCTTACA  | 10621 | GCGCGATCTG  | TGCCGGGGTG  | AGGGTAGGGC | GGGGGCCAAA | CTTCACGCCT  | CGGGCCTTGG  |
| 7441 | GACAAGCTGT | GACCGTCTCC  | GGGAGCTGCA  | TGTGTACAG  | GTTTTCACCG  | TCATACCGGA  | 10681 | CGGCTCTCGC  | CCCGCTCCGG  | GTCGCGTCA  | TGATTAGGGA | ACGCTCGAAC  | TCGGCAATGC  |
| 7501 | AACGCGCGAG | GCAGGGTGCC  | TTGATGTGGG  | CGCCGGCGGT | CGAGTGGCGA  | CGGCGCGGCT  | 10741 | CGCGCAACAC  | GGTCAACACC  | ATGCGGCCG  | GCGCCGTGGT | CTTCGGTCA   | CAGCGCTCTG  |
| 7561 | TGTCGCGGCC | CTGGTAGATT  | GCCTGGCCGT  | AGGCGCAGCA | TTTGTAGAGC  | GCCAGCGGCC  | 10801 | CCAGGCTACG  | CAGGCCCGCG  | CCGGCCTCCT | GGATGCGCTC | GGCAATGTCC  | AGTAGGTCGC  |
| 7621 | GCGATAGGCC | GACGCGAAGC  | GGCGGGCGGT  | AGGGAGCGCA | GCGTCAAGAG  | GATAGGCGCT  | 10861 | GGGTGCTGCG  | GGCCAGGCGG  | TCTAGCCTGG | TCACTGTAC  | AACGTGCGCA  | GGGCGTAGGT  |
| 7681 | TTTTGACGCT | CTTCGGCTGT  | GCGCTGGCCA  | GACAGTTATG | CGGCTTTTTT  | CTCTTTTATA  | 10921 | GGTCAAGCAT  | CCTGGCCAGC  | TCGGGGCGGT | CGCGCCTGGT | GCCGGTGATC  | TTCTCGGAAA  |
| 7741 | AGAGTTTTAA | TAAGTTTTAA  | AGAGTTTTAG  | GCGGAAAAAT | CGCCTTTTTT  | CTCTTTTATA  | 10981 | ACAGCTTGGT  | GTCAGCGGCC  | GCGTGCAGTT | GCGCCGTGGT | GTTGTGCAAG  | TCCTGGTCTG  |
| 7801 | TCAGTCACTT | ACATGTGTGA  | CCGCTTCCCA  | ATGTACGGCT | TTGGGTCTCC  | ATCTACCGGG  | 11041 | CGGTGCTGAC  | GCGGGCATAG  | CCCAGCAGGC | CAGCGCGGCG | GCTCTTGTTT  | ATGGCGTAAT  |
| 7861 | TTCCGGTTCC | CAATGTACGG  | CTTTGGGTTT  | CCAATGTACG | TGCTATCCAC  | AGGAAAGAGA  | 11101 | GTCTCCGGTT  | CTAGTCGCAA  | GTATTCTACT | TTATGCGACT | AAAAACGCG   | ACAAGAAAAC  |
| 7921 | CTTTTTCGAC | CTTTTTCGCC  | TGCTTAGGGCA | ATTTGCGCTA | GCATCTGCTC  | GCTACATTAG  | 11161 | GCCAGGAAAA  | GGGCGGGGCG  | GCAGCCTGTC | GCGTAACCTA | GGACTTGTGC  | GACATGTGCT  |
| 7981 | GACCCGCGCG | ATGCTTTCGCC | CTGCATCAGG  | TTGCGGTAGC | GCATCAGTAG  | GTAGAGTCCG  | 11221 | TTTGAACAAG  | GCGCTGCACT  | GAACGTACAG | AGCCGATGTC | ACTATAGCAG  | CGGAGGGGTT  |
| 8041 | GCCTGCCCCG | CCTCTCTCTT  | CAAAATCGTAC | TCCGGCAGGT | CATTTGACCC  | GATCAGCTTG  | 11281 | GGATCAAAGT  | ACT         |            |            |             |             |
| 8101 | CGCAGCGTGA | AACAGCAACT  | CTTGAACCTT  | CCGCGCGCTG | CACCTGCGTT  | GATAGTCTGC  |       |             |             |            |            |             |             |
| 8161 | TTGAACAACC | ATCTGGCTTC  | TGCCTTCTCT  | GCGGCGCGCG | CTGCCAGGCG  | TAGAGAAAAA  |       |             |             |            |            |             |             |
| 8221 | CGGCCGATGC | CGGGATCGAT  | CAAAAAGTAA  | TGGGGGTGAA | CGCTCAGCAC  | GTCCGGGTTT  |       |             |             |            |            |             |             |

**Supplemental Figure S8. F-SHMT08cΔ+G106A/S107A-CDs, insert size, vector, restriction enzymes, and sequenced positive clones used for cloning.**

**Gene Name** F-SHMT08cΔ+H134A-CDS

**Cloning Vector** pG2RNAi2

**Length (bp)** 1430

**Cloning Sites** Ascl-AvrII

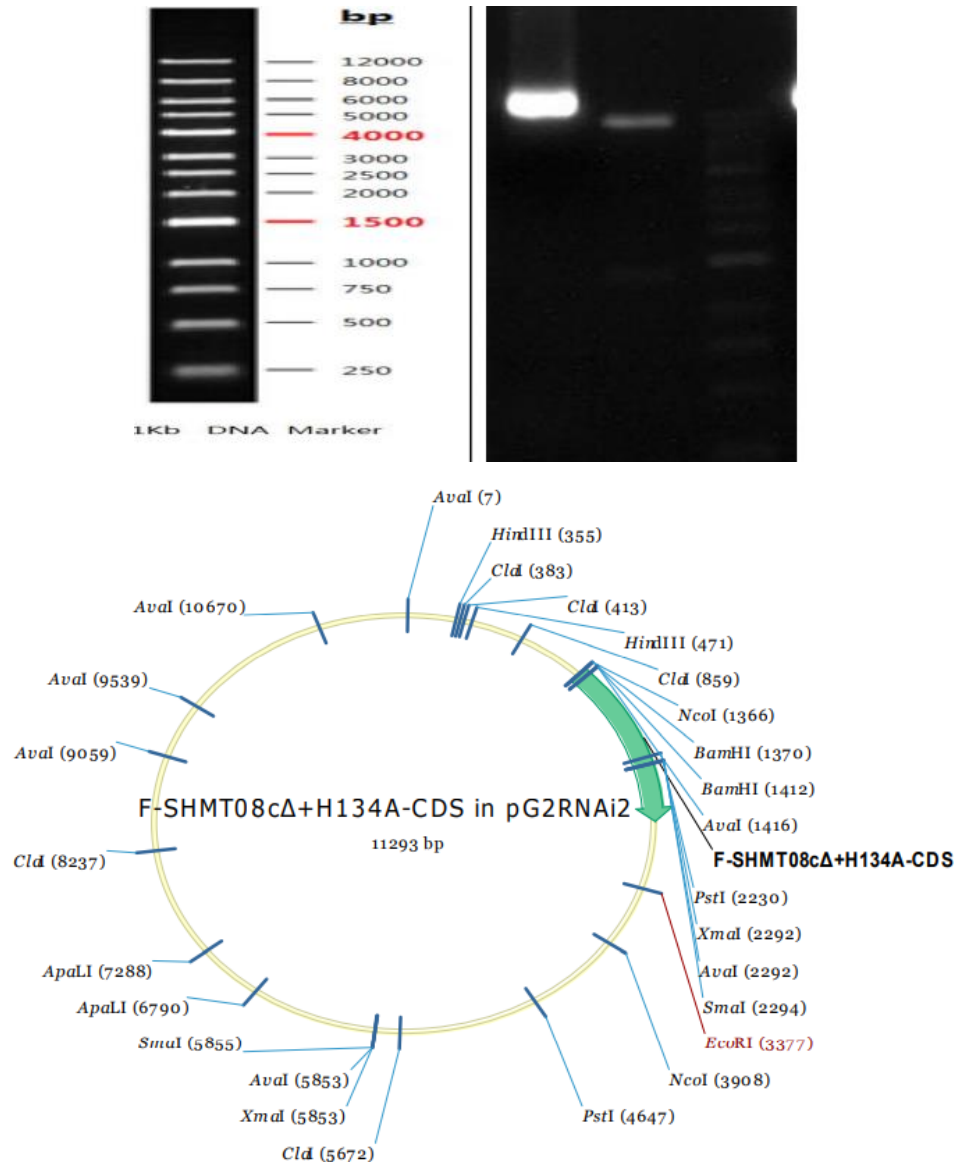

**Supplemental Figure S9.** F-SHMT08cΔ+H134A-CDS, insert size, vector, restriction enzymes, and sequenced positive clones used for cloning.

### Detailed Sequence of the Whole Construct:

```
1 TTGATCCCGA GGGGAACCCCT GTGGTTGGCA TGCACATACA AATGGACGAA CGGATAAACC
61 TTTTCACGCC CTTTAAATA TCCGTTATTC TAATAAACGC TCTTTTCTCT TAGGTTTACC
121 CGCCAATATA TCCTGTCAAA CACTGATAGT TTAAACTGAA GCGGGGAAAC GACAATCTGA
181 TCCAAGCTCA AGCTCATTCG CCATTCAGGC TGCGCAACTG TTGGGAAGGG CGATCGGTGC
241 GGGCCTCTTC GCTATTACGC CAGCTGGCGA AAGGGGGATG TGCTGCAAGG CGATTAAAGTT
301 GGGTAACGCC AGGGTTTTCC CAGTCACGAC GTTGTA AAAAC GACGGCCAGT GCCAAGCTTA
361 TTACCCTGTT ATCCCTAGAT ATCGATTTTG GCTACCTTAA GGTAGCCAAA ATCGATCACT
421 AGTGCGGCCG CGGGCCCAAT ATAACAACGA CGTCGTAACA GATAAAGCGA AGCTTGAAGG
481 TGCATGTGAC TCCGTCAAGA TTACGAAACC GCCAACTACC ACGCAAATTG CAATTCTCAA
541 TTTCTTAGAA GGACTCTCCG AAAATGCATC CAATACCAA TATTACCCGT GTCATAGGCA
601 CCAAGTGACA CCATACATGA ACACGCGTCA CAATATGACT GGAGAAGGGT TCCACACCTT
661 ATGCTATAAA ACGCCCCACA CCCCTCCTCC TTCCTTCGCA GTTCAATTCC AATATATTCC
721 ATTCTCTCTG TGTATTTCCC TACCTCTCCC TTCAAGGTTA GTCGATTTCT TCTGTTTTTC
781 TTCTTCGTTC TTTCCATGAA TTGTGTATGT TCTTTGATCA ATACGATGTT GATTTGATTG
841 TGTTTTGTTT GGTTTCATCG ATCTTCAATT TTCATAATCA GATTCAGCTT TTATTATCTT
```

|                                                                         |                                                                         |
|-------------------------------------------------------------------------|-------------------------------------------------------------------------|
| 901 TACAACAACG TCCTTAATTT GATGATTCTT TAATCGTAGA TTTGCTCTAA TTAGAGCTTT   | 2461 TCTCTGTAAC ATTACTGTTA ACAAGAACGC TGTTTTTGGT GATAGCAGTG CCTTGCCCC   |
| 961 TTCATGTCAG ATCCCTTTAC AACAGCCTT AATTGTTGAT TCATTAATCG TAGATTAGGG    | 2521 TGGTGGAGTG CGAATTGGTG CCCCTGCCAT GACTTCTAGG GGTTTGGTTG AAAAAGACTT  |
| 1021 CTTTTTTCAT TGATTACTTC AGATCCGTTA AACGTAACCA TAGATCAGGG CTTTTTCATG  | 2581 TGAGCAGATT GGTGAGTTCC TTCACCGTGC TGTGACTCTC AACTGAGAGA TCCAGAAGGA  |
| 1081 AATTACTTCA GATCCGTTAA ACAACAGCCT TATTTTTTAT ACTTCTGTGG TTTTCAAGA   | 2641 GCATGGCAAA CTCTCAAGG ATTTCAACAA GGGTCTCGTC AACACAAGG CTATTGAAGA    |
| 1141 AATTGTTTCA ATCCGTTGAC AAAAAGCCTT ATTCTGTTGAT TCTATATCGT TTTTCGAGAG | 2701 TCTCAAAGCT GATGTTGAGA AGTTCTCTGC CTGTTTGAC ATGCCTGGCT TCCTGGTATC   |
| 1201 ATATTGCTCA GATCTGTTAG CAACTGCCTT GTTTGTTGAT TCTATTGCCG TGGATTAGGG  | 2761 TGAAATGAAG TACAAGGATT AGCCTAGGTT CGAGTATTAT GGCATTGGGA AAAGTGTTTT  |
| 1261 TTTTTTTTCA CGAGATTGCT TCAGATCCGT ACTTAAGATT ACGTAATGGA TTTTGATTCT  | 2821 TCTTGTACCA TTTGTTGTGC TTGTAATTTA CTGTGTTTTT TATTCGGTTT TCGCTATCGA  |
| 1321 GATTATATCTG TGATTGTTGA CTCGACAGCG GCCGCACCGG CGCGCCATGG ATCCAGTAAG | 2881 ACTGTGAAAT GGAAATGGAT GGAGAAGAGT TAATGAATGA TATGGTCTCT TTGTTTCATC  |
| 1381 CGTGTGGGGT AACACGCCCT TGGCGACGGT GGATCCCGAG ATCCATGACC TCATCGAGAA  | 2941 TCAAATTAAT ATTATTGTTT TTTTCTCTTA TTTGTTGTGT GTTGAATTTG AAATTATAAG  |
| 1441 GGAGAAGCGC CGTCAATGCC GCGGAATCGA GCTCATCGCC TCCGAGAAGT TCACCTCCTT  | 3001 AGATATGCAA ACATTTTGTG TTGAGTAAAA ATGTGTCAAA TCGTGGCCTC TAATGACCGA  |
| 1501 CGCCGTCATC GAGGCCCTCG GCAGCGCTCT CACGAACAAA TACTCCGAGG GCATGCCGGG  | 3061 AGTTAATATG AGGAGTAAAA CACTTGAGT TGTACCATTA TGCTTATTCA CTAGGCAACA   |
| 1561 CAACCGCTAC TACGCGCGCA ATGAATACAT CGACCAAGAT GAAACCTCTT GCCGCTCAGG  | 3121 AATATATTTT CAGACCTAGA AAAGCTGCAA ATGTTACTGA ATACAAGTAT GTCCTCTTGT  |
| 1621 CGCCCTCCAA GCCTTCCACC TCGACGCCCA ATCCTGGGGC GTCAACGTCC AGCCCTACTC  | 3181 GTTTTAGACA TTTATGAACT TTCCTTTATG TAATTTTCCA GAATCCTTGT CAGATTCTAA  |
| 1681 CGGCTCCCCG GCCAACTTCG CCGCTACAC CGCCGTCCTC AACCCTCACG ACCGCATCAT   | 3241 TCATTGCTTT ATAATTATAG TTATACTCAT GGATTTGTAG TTGAGTATGA AAATATTTTT  |
| 1741 GGGGCTAGAT CTCCGCTCCG GCGGCGCTCT CACCCACGGC TACTACACCT CCGGCGGAAA  | 3301 TAATGCATTT TATGACTTGC CAATTGATTG ACAACATGCA TCAATCCGCG GTTATGACTC  |
| 1801 GAAGATCTCC GCCACCTCCA TTTACTTCGA GAGTCTCCCT TACAAGGTAA ACTCCACCAC  | 3361 TCTTAAGAGA GTCATGAATT CGAGCTTCCA GAAGGTAATT ATCCAAGATG TAGCATCAAG  |
| 1861 CGGCTACATC GACTACGACC GCTTGAAGA AAAAGCCCTA GACTTCAGGC CAAAATCAT    | 3421 AATCCAATGT TTACGGGAAA AACTATGGAA GTATTATGTG AGCTCAGCAA GAAGCAGATC  |
| 1921 AATCTGCGGT GGCAGCGCGT ACCCTCGCGA TTGGGACTAC AAACGTTTCA GGAAGTCGC   | 3481 AATATGCGGC ACATATGCAA CCTATGTTCA AAAATGAAGA ATGTACAGAT ACAAGATCCT  |
| 1981 TGATAAGTGC GGAGCATTGC TTCTCTGCGA CATGGCGCAC ACTAGCGGCC TTGTGGCCGC  | 3541 ATACTGCCAG AATACGAAGA AGAATACGTA GAAATTGAAA AAGAAGAACC AGGCGAAGAA  |
| 2041 GCAGGAAGTG AACAGCCCTT TCGAGTATTG CGACATTGTG ACCACCACGA CTCACAAGAG  | 3601 AAGAATCTTG AAGACGTAAG CACTGACGAC AACAAATGAAA AAGAAGAAGT AAGGTCGGTG |
| 2101 CTTGCGGGGC CCACGTGCGG GGATGATCTT TTACCGGAAG GGCCCCAAGC CGCCGAAGAA  | 3661 ATTGTAAGAA AGACATAGAG GACACATGTA AGGTGGAAAA TGTAAGGGCG GAAAGTAACC  |
| 2161 GGGGAGCCG GAGAAGCGCG TTTATGATTG CGAGGACAAG ATTAACCTTC CGGTGTTCCC   | 3721 TTATCACAAA GGAATCTTAT CCCCCTACTC TTATCCTTTT ATATTTTTTC GTGTCATTTT  |
| 2221 TTCGCTGCAG GGTGGGCCCC ACAACCACCA GATCGGTGCT CTCGCCGTGG CGCTGAAGCA  | 3781 TGCCCTTGAG TTTTCCTATA TAAGGAACCA AGTTCCGCAT TTGTGAAAAA AAGAAAAAAT  |
| 2281 GGCCGCTCG CCCGGGTTTA AGGCCTACGC GAAGCAGGTT AAGCGCAAGC CCGTTGCGCT   | 3841 TTGTTGTAAG CTATTTTCTT TGAAGTACTG AGGATACAAC TTCAGAGAAA TTTGTAAGTT  |
| 2341 TGAAAAATAC TTGATGGGGA AAGGTACAG CTTGTGCACT GCGGAACGG AGAACATCT     | 3901 TGTGATCCAT GGTGAGCAAG GCGAGGAGC TGTTCCACCG GGTGGTGCCC ATCCTGGTGC   |
| 2401 TGTTTTGTGG GATCTGAGAC CTCTTGATTG GACTGGGTAT AAGGTGGAGA AACTCTGTGA  | 3961 AGCTGGACGG CGACGTAAAC GGCCACAAGT TCAGCGTGTC CGGCGAGGGC GAGGGCGATG  |

**Supplemental Figure S9.** F-SHMT08cΔ+H134A-CDS, insert size, vector, restriction enzymes, and sequenced positive clones used for cloning.

|                                                                         |                                                                         |
|-------------------------------------------------------------------------|-------------------------------------------------------------------------|
| 4021 CCACCTACGG CAAGCTGACC CTGAAGTTCA TCTGCACCAC CGGCAAGCTG CUCGTGCUCT  | 5581 TAGGCCGCGA TTAAATTCCA ACATGGATGC TGATTTATAT GGGTATAAAT GGGCTCGCGA  |
| 4081 GGCCACCCCT CGTGACCACC TTCACCTACG GCGTGCAGTG CTTAGCCGCG TACCCCGACC  | 5641 TAATGTCGGG CAATCAGGTG CGACAATCTA TCGATTGTAT GGAAGCCCG ATGCGCCAGA   |
| 4141 ACATGAAGCA GCACGACTTC TTCAAGTCCG CCATGCCCCG AGGCTACGTC CAGGAGCGCA  | 5701 GTTGTCTCTG AAACATGGCA AAGGTAGCGT TGCCAATGAT GTTACAGATG AGATGGTCAG  |
| 4201 CCATCTTCTT CAAGGACGAC GGCAACTACA AGACCCGCGC CGAGGTGAAG TTCGAGGGCG  | 5761 ACTAACTGG CTGACGGAAT TTATGCCTCT TCCGACCATC AAGCATTTTA TCCGTACTCC   |
| 4261 ACACCCTGGT GAACCGCATC GAGCTGAAGG GCATCGACTT CAAGGAGGAC GGCAACATCC  | 5821 TGATGATGCA TGGTTACTCA CCACTGCGAT CCCCAGGAAA ACAGCATTTCC AGGTATTAGA |
| 4321 TGGGGCACAA GCTGGAGTAC AACTACAACA GCCACAACGT CTATATCATG GCCGACAAGC  | 5881 AGAATATCCT GATTCAGGTG AAAATATTGT TGATGCGCTG GCAGTGTTCG TCGCCGGTT   |
| 4381 AGAAGAACGG CATCAAGGTG AACTTCAAGA TCCGCCACAA CATCGAGGAC GGCAGCGTGC  | 5941 GCATTCGATT CCTGTTTGTA ATTGTCCTTT TAACAGCGAT CGCGTATTTT GTCTCGCTCA  |
| 4441 AGCTCGCCGA CCACTACCAG CAGAACACCC CCATCGGCGA CGGCCCGGTG CTGCTGCCCG  | 6001 GGCACAATCA CGAATGAATA ACGGTTTGGT TGATGCGAGT GATTTTGATG ACGAGCGTAA  |
| 4501 ACAACCACTA CCTGAGCACC CAGTCCGCCG TGAGCAAAGA CCCCACGAG AAGCGCGATC   | 6061 TGGCTGGCCT GTTGAACAAG TCTGGAAAGA AATGCATAAA CTTTGTCCAT TCTCACCAGA  |
| 4561 ACATGGTCCT GCTGGAGTTC GTGACCGCCG CCGGGATCAC TCACGGCATG GACGAGCTGT  | 6121 TTCAGTCGTC ACTCATGGTG ATTTCTCACT TGATAACCTT ATTTTGTACG AGGGGAAATT  |
| 4621 ACAAGTAAAG CGGCCGCCG GCTGCAGATC GTTCAAACAT TTGGCAATAA AGTTTCTTAA   | 6181 AATAGGTTGT ATTGATGTTG GACGAGTCGG AATCGCAGAC CGATACCAGG ATCTTGCCAT  |
| 4681 GATTGAATCC TGTTGCCGGT CTTGCGATGA TTATCATATA ATTTCTGTTG AATTACGTTA  | 6241 CCTATGGAAC TGCCTCGGTG AGTTTTCTCC TTCATTACAG AAACGGCTTT TTCAAAAATA  |
| 4741 AGCATGTAAT AATTAACATG TAATGCATGA CGTTATTTAT GAGATGGGTT TTTATGATTA  | 6301 TGGTATTGAT AATCCTGATA TGAATAAATT GCAGTTTCAT TTGATGCTCG ATGAGTTTTT  |
| 4801 GAGTCCCGCA ATTATACATT TAATACGCGA TAGAAAACAA AATATAGCGC GCAAAC TAGG | 6361 CTAAGAATTA ATTCATGATC CTGCATGACC AAAATCCCTT AACGTGAGTT TTCGTTCCAC  |
| 4861 ATAAATTATC GCGCGCGGTG TCATCTATGT TACTAGATCC GATGATAAGC TGTCAAACAT  | 6421 TGAGCGTCAG ACCCCGTA GAAGATCAAA GGATCTTCTT GAGATCCTTT TTTTCTGCGC    |
| 4921 GAGAATTAAT TCGTAATCAT GTCATAGCTG TTTCTGTGT GAAATTGTTA TCCGCTCACA   | 6481 GTAATCTGCT GCTTGCAAAC AAAAAACCA CCGCTACCAG CGGTGGTTTG TTTGCCGGAT   |
| 4981 ATTCCACACA ACATACGAGC CGGAAGCATA AAGTGTAAG CCTGGGGTGC CTAATGAGTG   | 6541 CAAGAGCTAC CAACTCTTTT TCCGAAGGTA ACTGGCTTCA GCAGAGCGCA GATACCAAAT  |
| 5041 AGCTAACTCA CATTAATTGC GTTGCGCTCA CTGCCCCTT TCCAGTCGGG AAACCTGTG    | 6601 ACTGTCCTTC TAGTGTAGCC GTAGTTAGGC CACCACTTCA AGAACTCTGT AGCACCGCCT  |
| 5101 TGCCAGCTGC ATTAATGAAT CGGCCAACGC GCGGGGAGAG GCGGTTTGCG TATTGGCTAG  | 6661 ACATACCTCG CTCTGCTAAT CCTGTTACCA GTGGCTGCTG CCAGTGGCGA TAAGTCGTGT  |
| 5161 AGCAATTTCG CGTTAATTCA GTACATTAAA AACGTCCGCA ATGTGTTATT AAGTTGTCTA  | 6721 CTTACCGGGT TGGACTCAAG ACGATAGTTA CCGGATAAGG CGCAGCGGTC GGGCTGAACG  |
| 5221 AGCGTCAATT TGTTTACACC ACAATATATC CTGCCACCAG CCAGCCAACA GCTCCCCGAC  | 6781 GGGGGTTCTG GCACACAGCC CAGCTTGAG CGAACGACCT ACACCGAACT GAGATACCTA   |
| 5281 CGGCAGCTCG GCACAAAATC ACCACTCGAT ACAGGCAGCC CATCAGTCCG GGACGGCGTC  | 6841 CAGCGTGAGC TATGAGAAAG CGCCACGCTT CCCGAAGGGA GAAAGGCGGA CAGGTATCCG  |
| 5341 AGCGGGAGAG CCGTTGTAAG GCGGCAGACT TTGCTCATGT TACCGATGCT ATTGCGAAGA  | 6901 GTAAGCGGCA GGGTCGGAAC AGGAGAGCGC ACGAGGGAGC TTCCAGGGGG AAACGCTGG   |
| 5401 ACGGCACTA AGCTGCCGGG TTTGAAACAC GGATGATCTC GCGGAGGGTA GCATGTTGAT   | 6961 TATCTTTATA GTCCTGTGCG GTTTCGCCAC CTCTGACTTG AGCGTCGATT TTTGTGATGC  |
| 5461 TGTAACGATG ACAGAGCGTT GCTGCCTGTG ATCCAGATCA TGAACAATAA AACTGTCTGC  | 7021 TCGTCAGGGG GGCGGAGCCT ATGGAAAAAC GCCAGCAACG CGGCCTTTTT ACGGTTCTCTG |
| 5521 TTACATAAAC AGTAATACAA GGGGTGTTAT GAGCCATATT CAACGGGAAA CGTCTTGCTC  | 7081 GCCTTTTGCT GGCCTTTTGC TCACATGTTT TTTCTGCGT TATCCCTGA TTCTGTGGAT    |

**Supplemental Figure S9.** F-SHMT08cΔ+H134A-CDS, insert size, vector, restriction enzymes, and sequenced positive clones used for cloning.

|                                                                         |                                                                         |
|-------------------------------------------------------------------------|-------------------------------------------------------------------------|
| 7141 AACCGTATTA CCGCCTTTGA GTGAGCTGAT ACCGCTCGCC GCAGCCGAAC GACCGAGCGC  | 8701 TCGTAGCGGA TCACCTCGCC AGCTCGTCGG TCACGCTTCG ACAGACGGAA AACGGCCACG  |
| 7201 AGCGAGTCAG TGAGCGAGGA AGCGGAAGAG CGCCTGATGC GGTATTTTCT CTTTACGCAT  | 8761 TCCATGATGC TGCGACTATC GCGGGTGCCC ACGTCATAGA GCATCGGAAC GAAAAATCT   |
| 7261 CTGTGCGGTA TTTCACACCG CATATGGTGC ACTCTCAGTA CAATCTGCTC TGATGCCGCA  | 8821 GGTGTGCTCGT CGCCCTTGGG CGGCTTCCTA ATCGACGGCG CACCGGTGC CGCGGTGTC   |
| 7321 TAGTTAAGCC AGTATACACT CCGCTATCGC TACGTGACTG GGTTCATGGCT GCGCCCCGAC | 8881 CGGGATTCTT TGCGGATTCG ATCAGCGGCC GCTTGCCACG ATTCACCGGG GCGTGTCTCT  |
| 7381 ACCCGCCAAC ACCCGCTGAC GCGCCCTGAC GGGCTTGTCT GCTCCCGGCA TCCGCTTACA  | 8941 GCCTCGATGC GTTGCCCGTG GCGGCGCTGC GCGGCCTTCA ACTTCTCCAC CAGGTCATCA  |
| 7441 GACAAGCTGT GACCGTCTCC GGGAGCTGCA TGTGTCAGAG GTTTTCACCG TCATCACCGA  | 9001 CCCAGCGCCG CGCCGATTTC TACCGGGCCG GATGTTTTGC GACCGTCACG CCGATTCTCT  |
| 7501 AACGCGCGAG GCAGGGTGCC TTGATGTGGG CGCCGCGGT CGAGTGCGCA CGGCGCGGCT   | 9061 GGGCTTGGGG GTTCCAGTGC CATTGCAGGG CCGCAGACA ACCAGCCGC TTACGCCTGG    |
| 7561 TGTCCGCGCC CTGGTAGATT GCCTGGCCGT AGGCCAGCCA TTTTGTAGCG GCCAGCGGCC  | 9121 CCAACCGCCC GTTCTCTCAC ACATGGGGCA TTCCACGGCG TCGGTGCCTG GTTGTCTTGG  |
| 7621 GCGATAGGCC GACGCGAAGC GCGGGGGCGT AGGGAGCGCA GCGACCGAAG GGTAGGCGCT  | 9181 ATTTTCCATG CCGCCTCCTT TAGCCGCTAA AATTCATCTA CTCATTATT CATTGTCTCA   |
| 7681 TTTTGCAGCT CTTGCGGTGT GCGCTGGCCA GACAGTTATG CACAGGCCAG GCGGGTTTTA  | 9241 TTTACTCTGG TAGTGCAGCG ATGTATTGAG ATAGCAGCTC GGTAATGGTC TTGCCTTGGC  |
| 7741 AGAGTTTTAA TAAGTTTTAA AGAGTTTTAG GCGGAAAAAT CGCCTTTTTT CTCTTTTATA  | 9301 GTACCGCGTA CATCTTCAGC TTGGTGTGAT CCTCCGCCGG CAACTGAAAG TTGACCCGCT  |
| 7801 TCAGTCACTT ACATGTGTGA CCGGTTCCCA ATGTACGGCT TTGGGTTCCT AATGTACGGG  | 9361 TCATGGCTGG CGTGTCCTGCC AGGCTGGCCA ACGTTGCAGC CTTGCTGCTG CGTGCGCTCG |
| 7861 TTCCGGTTCC CAATGTACGG CTTTGGGTTC CCAATGTACG TGCTATCCAC AGGAAAGAGA  | 9421 GACGGCCGGC ACTTAGCGTG TTTGTGCTTT TGCTCATTTT CTCTTTACCT CATTAACTCA  |
| 7921 CCTTTTCGAC CTTTTTCCCC TGCTAGGGCA ATTTGCCCTA GCATCTGCTC CGTACATTAG  | 9481 AATGAGTTT GATTTAATTT CAGCGGCCAG CGCCTGGACC TCGCGGGCAG CGTCGCCCTC   |
| 7981 GAACCGGCGG ATGCTTCGCC CTCGATCAGG TTGCGGTAGC GCATGACTAG GATCGGGCCA  | 9541 GGGTTCTGAT TCAAGAACGG TTGTGCCGGC GCGGCGAGTG CCTGGGTAGC TCACGCGCTG  |
| 8041 GCCTGCCCCG CCTCTCCTT CAAATCGTAC TCCGGCAGGT CATTTGACCC GATCAGCTTG   | 9601 CGTGATACGG GACTCAAGAA TGGGCAGCTC GTACCCGGCC AGCGCCTCGG CAACCTCACC  |
| 8101 CGCACGGTGA AACAGAACTT CTTGAACCTC CCGGCGCTGC CACTGCGTTC GTAGATCGTC  | 9661 GCCGATGCGC GTGCCCTTGA TCGCCCGCGA CACGACAAAG GCCGCTTGTA GCCTTCCATC  |
| 8161 TTGAACAACC ATCTGGCTTC TGCCTTGCTT GCGGCGCGGC GTGCCAGGCG GTAGAGAAAA  | 9721 CGTGACCTCA ATGCGCTGCT TAACCAGCTC CACCAGGTCG GCGGTGGCCC ATATGTCGTA  |
| 8221 CGGCCGATGC CGGGATCGAT CAAAAAGTAA TCGGGGTGAA CCGTCAGCAC GTCCGGGTTC  | 9781 AGGGCTTGCC TGCACCGGAA TCAGCACGAA GTCGCTGCC TTGATCGCGG ACACAGCCAA   |
| 8281 TTGCCCTCTG TGATCTCGCG GTACATCCAA TCAGCTAGCT CGATCTCGAT GTACTCCGGC  | 9841 GTCCCGCGCC TGGGGCGCTC CGTCGATCAC TACGAAGTCG CGCCGGCCGA TGGCCTTCAC  |
| 8341 CGCCCGGTTT CGCTCTTTAC GATCTTGTAG CGGCTAATCA AGGCTTCACC CTCGGATACC  | 9901 GTCGCGGTCA ATCGTCGGGC GGTGATGCC GACAACGGTT AGCGGTTGAT CTTCCCGCAC   |
| 8401 GTCACCAGGC GGCCGTTCTT GGCCTTCTTC GTACGCTGCA TGGCAACGTG CGTGGTGTTC  | 9961 GGCCGCCCAA TCGCGGGCAC TGCCCTGGGG ATCGGAATCG ACTAACAGAA CATCGGCCCC  |
| 8461 AACCGAATGC AGGTTTCTAC CAGGTCGTCT TTCTGTCTTC CGCCATCGGC TCGCCGGCAG  | 10021 GGCGAGTTGC AGGGCGCGGG CTAGATGGGT TGCGATGGTC GTCTTGCTTG ACCCGCCTTT |
| 8521 AACTTGAGTA CGTCCGCAAC GTGTGGACGG AACACGCGGC CGGGCTTGTC TCCCTTCCCT  | 10081 CTGGTTAAGT ACAGCGATAA CCTTCATGCG TTCCCTTTCG GTATTGTGTT ATTTACTCAT |
| 8581 TCCCGGTATC GGTTTCATGA TTCGGTTAGA TGGGAAACCG CCATCAGTAC CAGGTCGTAA  | 10141 CGCATCATAT ACGCAGCGAC CGCATGACGC AAGCTGTTTT ACTCAAATAC ACATCACCTT |
| 8641 TCCACACAC TGGCCATGCC GGCCGGCCCT GCGGAAACCT CTACGTGCCC GTCTGGAAGC   | 10201 TTTAGACGGC GCGCTCGGT TTCTTCAGCG GCCAAGCTGG CCGGCCAGGC CGCCAGCTTG  |

**Supplemental Figure S9.** F-SHMT08cΔ+H134A-CDS, insert size, vector, restriction enzymes, and sequenced positive clones used for cloning.

```

10261 GCATCAGACA AACCGGCCAG GATTTTCATGC AGCCGCACGG TTGAGACGTG CGCGGGCGGC
10321 TCGAACACGT ACCCGGCCGC GATCATCTCC GCCTCGATCT CTTCCGTAAT GAAAAACGGT
10381 TCGTCCTGGC CGTCCTGGTG CGGTTTCATG CTTGTTCTC TTGGCGTTCA TTCTCGGCGG
10441 CCGCCAGGGC GTCGGCCTCG GTCAATGCGT CCTCACGGAA GGCACCGCGC CGCCTGGCCT
10501 CGGTGGGCGT CACTTCCTCG CTGCGCTCAA GTGCGCGGTA CAGGGTCGAG CGATGCACGC
10561 CAAGCAGTGC AGCCGCCTCT TTCACGGTGC GGCCTTCCTG GTCGATCAGC TCGCGGGCGT
10621 GCGCGATCTG TGCCGGGGTG AGGGTAGGGC GGGGGCCAAA CTTACGCCT CGGGCCTTGG
10681 CGGCCTCGCG CCCGCTCCGG GTGCGGTCGA TGATTAGGGA ACGCTCGAAC TCGGCAATGC
10741 CGGCGAACAC GGTCAACACC ATGCGGCCGG CCGGCGTGGT GGTGTCGGCC CACGGCTCTG
10801 CCAGGCTACG CAGGCCCCGCG CCGGCCTCCT GGATGCGCTC GGCAATGTCC AGTAGGTCGC
10861 GGGTGCTGCG GGCCAGGCGG TCTAGCCTGG TCACTGTCAC AACGTCGCCA GGGCGTAGGT
10921 GGTCAAGCAT CCTGGCCAGC TCCGGGCGGT CGCGCCTGGT GCCGGTGATC TTCTCGGAAA
10981 ACAGCTTGGT GCAGCCGGCC GCGTGCA GTT GCGCCCGTTG GTTGGTCAAG TCCTGGTCGT
11041 CGGTGCTGAC GCGGGCATAG CCCAGCAGGC CAGCGGCGGC GCTCTTGTTT ATGGCGTAAT
11101 GTCTCCGTT CTAGTCGCAA GTATTCTACT TTATGCGACT AAAACACGCG ACAAGAAAA
11161 GCCAGGAAAA GGGCAGGGCG GCAGCCTGTC GCGTAACTTA GGA CTGTGTGC GACATGTCGT
11221 TTTCAGAAGA CGGCTGCACT GAACGTCAGA AGCCGACTGC ACTATAGCAG CGGAGGGGTT
11281 GGATCAAAGT ACT

```

**Gene Name** F-SHMT08cΔ+F284A-CDS

**Cloning Vector** pG2RNAi2

**Length (bp)** 1430

**Cloning Sites** Ascl-AvrII

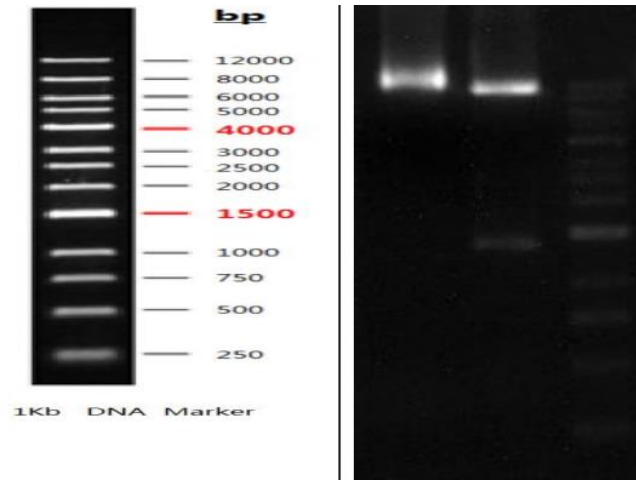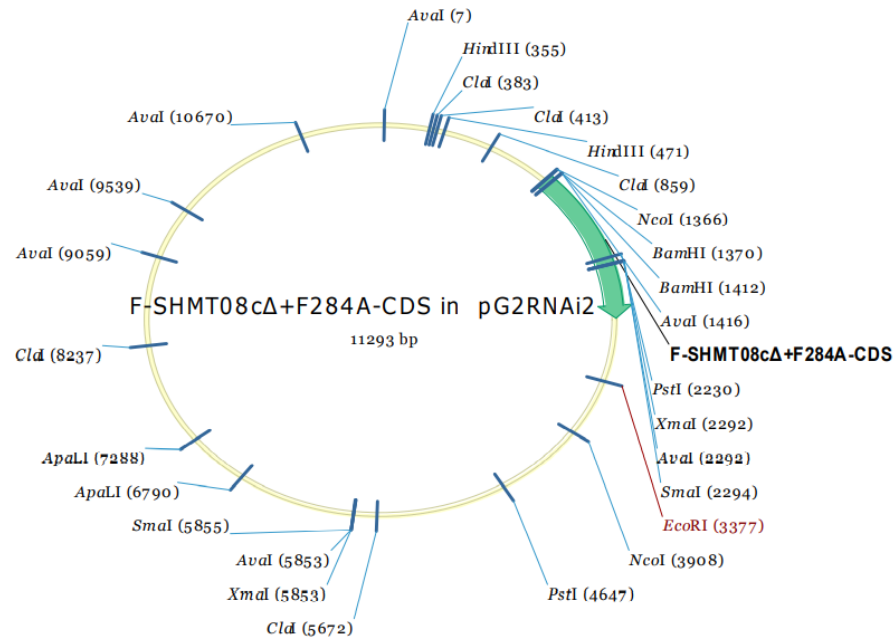

**Supplemental Figure S10.** F-SHMT08cΔ+F284A-CDS, insert size, vector, restriction enzymes, and sequenced positive clones used for cloning.

## Detailed Sequence of the Whole Construct:

```
1  TTGATCCCGA GGGGAACCCT GTGGTTGGCA TGCACATACA AATGGACGAA CGGATAAACC
61  TTTTCACGCC CTTTTAAATA TCCGTTATTC TAATAAACGC TCTTTTCTCT TAGGTTTACC
121 CGCCAATATA TCCTGTCAAA CACTGATAGT TTAAACTGAA GGCGGGAAAC GACAATCTGA
181 TCCAAGCTCA AGCTCATTCG CCATTCAGGC TGCGCAACTG TTGGGAAGGG CGATCGGTGC
241 GGGCCTCTTC GCTATTACGC CAGCTGGCGA AAGGGGGATG TGCTGCAAGG CGATTAAGTT
301 GGGTAACGCC AGGGTTTTCC CAGTCACGAC GTTGTAAAAC GACGGCCAGT GCCAAGCTTA
361 TTACCCTGTT ATCCCTAGAT ATCGATTTTG GCTACCTTAA GGTAGCCAAA ATCGATCACT
421 AGTGCGGCCG CGGGCCCAAT ATAACAACGA CGTCGTAACA GATAAAGCGA AGCTTGAAGG
481 TGCATGTGAC TCCGTCAAGA TTACGAAACC GCCAACTACC ACGCAAATTG CAATTCTCAA
541 TTTCTAGAA GGACTCTCCG AAAATGCATC CAATACCAA TATTACCCGT GTCATAGGCA
601 CCAAGTGACA CCATACATGA ACACGCGTCA CAATATGACT GGAGAAGGGT TCCACACCTT
661 ATGCTATAAA ACGCCCCACA CCCCTCCTCC TTCCTTCGCA GTTCAATTCC AATATATTCC
721 ATTCTCTCTG TGTATTTCCC TACCTCTCCC TTCAAGGTTA GTCGATTTCT TCTGTTTTTC
781 TTCTTCGTTC TTTCCATGAA TTGTGTATGT TCTTTGATCA ATACGATGTT GATTTGATTG
841 TGTTTTGTTT GGTTTCATCG ATCTTCAATT TTCATAATCA GATTCAGCTT TTATTATCTT
```

901 TACAACAACG TCCTTAATTT GATGATTCTT TAATCGTAGA TTTGCTCTAA TTAGAGCTTT  
 961 TTCATGTCAG ATCCCTTTAC AACAAAGCCTT AATTGTTGAT TCATTAATCG TAGATTAGGG  
 1021 CTTTTTTCAT TGATTACTTC AGATCCGTTA AACGTAACCA TAGATCAGGG CTTTTTCATG  
 1081 AATTACTTCA GATCCGTTAA ACAACAGCCT TATTTTTTAT ACTTCTGTGG TTTTTCAGA  
 1141 AATTGTTTCA ATCCGTTGAC AAAAAGCCTT ATTCGTTGAT TCTATATCGT TTTTCGAGAG  
 1201 ATATTGCTCA GATCTGTTAG CAACTGCCTT GTTTGTGTAT TCTATTGCCG TGGATTAGGG  
 1261 TTTTTTTTCA CGAGATTGCT TCAGATCCGT ACTTAAGATT ACGTAATGGA TTTTGATTCT  
 1321 GATTTATCTG TGATTGTTGA CTCGACACGG GCCGCACCGG CGCGCCATGG ATCCAGTAAG  
 1381 CGTGTGGGGT AACACGCCCT TGGCGACGGT GGATCCCGAG ATCCATGACC TCATCGAGAA  
 1441 GGAGAAGCGC CGTCAATGCC GCGGAATCGA GCTCATCGCC TCCGAGAACT TCACCTCCTT  
 1501 CGCCGTCATC GAGGCCCTCG GCAGCGCTCT CACGAACAAA TACTCCGAGG GCATGCCGGG  
 1561 CAACCGCTAC TACGGCGGCA ATGAATACAT CGACCAGATC GAAAACCTCT GCCGCTCACG  
 1621 CGCCCTCCAA GCCTTCCACC TCGACGCCCA ATCCTGGGGC GTCAACGTCC AGCCCTACTC  
 1681 CGGCTCCCCG GCCAACTTCG CCGCCTACAC CGCCGCTCCT AACCCCCACG ACCGCATCAT  
 1741 GGGGCTAGAT CTCCGCTCCG GCGGCCACCT CACCCACGGC TACTACACCT CCGGCGGAAA  
 1801 GAAGATCTCC GCCACCTCCA TTTACTTCGA GAGTCTCCCT TACAAGGTAA ACTCCACCAC  
 1861 CGGCTACATC GACTACGACC GCTTGAAGA AAAAGCCCTA GACTTCAGGC CAAAACTCAT  
 1921 AATCTGCGGT GGCAGCGCGT ACCCTCGCGA TTGGGACTAC AAACGTTTCA GGAAGTCGCG  
 1981 TGATAAGTGC GGAGCATTGC TTCTCTCGCA CATGGCGCAC ACTAGCGGCC TTGTGGCCGC  
 2041 GCAGGAAGTG AACAGCCCTT TCGAGTATTG CGACATTGTG ACCACCACGA CTCACAAGAG  
 2101 CTTGCGGGGC CCACGTGCGG GGATGATCTT TTACCGGAAG GGCCCCAAGC CGCCGAAGAA  
 2161 GGGGCAGCCG GAGAACGCGG TTTATGATTT CGAGGACAAG ATTAACCTTCG CGGTGGCTCC  
 2221 TTCGCTGCAG GGTGGGCCCC ACAACCACCA GATCGGTGCT CTCGCCGTGG CGCTGAAGCA  
 2281 GGCCGCGTCG CCCGGGTTTA AGGCCTACGC GAAGCAGGTT AAGGCGAAGC CCGTTGCGCT  
 2341 TGGAAAATAC TTGATGGGGA AAGGGTACAG CTTGTCACT GCGGGAACGG AGAACCATCT  
 2401 TGTTTGTGGG GATCTGAGAC CTCTGGATT GACTGGGTAT AAGTGGAGA AACTCTGTGA

2461 TCTCTGTAAC ATTACTGTTA ACAAGAACGC TGTTTTTGGT GATAGCAGTG CCTTGGCCCC  
 2521 TGGTGGAGTG CGAATTGGTG CCCCTGCCAT GACTTCTAGG GGTGTGGTTG AAAAAGACTT  
 2581 TGAGCAGATT GGTGAGTTCC TTCACCGTGC TGTGACTCTC AACTGGAGA TCCAGAAGGA  
 2641 GCATGGCAAA CTCTCAAGG ATTTCAACAA GGGTCTCGTC AACAAACAGG CTATTGAAGA  
 2701 TCTCAAAGCT GATGTTGAGA AGTTCTCTGC CTTGTTTGAC ATGCCTGGCT TCCTGGTATC  
 2761 TGAATGAAG TACAAGGATT AGCCTAGGTT CGAGTATTAT GGCATTGGGA AAAGTGTTTT  
 2821 TCTGTACCA TTTGTTGTGC TTGTAATTTA CTGTGTTTTT TATTCGGTTT TCGCTATCGA  
 2881 ACTGTGAAAT GGAAATGGAT GGAGAAGAGT TAATGAATGA TATGGTCCTT TTGTTTCATC  
 2941 TCAAATTAAT ATTATTTGTT TTTTCTCTTA TTTGTTGTGT GTTGAATTTG AAATTATAAG  
 3001 AGATATGCAA ACATTTTGTT TTGAGTAAAA ATGTGTCAAA TCGTGGCCTC TAATGACCGA  
 3061 AGTTAATATG AGGAGTAAAA CACTTGTAGT TGTACCATTA TGCTTATTCA CTAGGCAACA  
 3121 AATATATTTT CAGACCTAGA AAAGCTGCAA ATGTTACTGA ATACAAGTAT GTCCTCTTGT  
 3181 GTTTTAGACA TTTATGAACT TTCCCTTATG TAATTTTCCA GAATCCTTGT CAGATTCTAA  
 3241 TCATTGCTTT ATAATTATAG TTATACTCAT GGATTTGTAG TTGAGTATGA AAATATTTTT  
 3301 TAATGCATTT TATGACTTGC CAATTGATTG ACAACATGCA TCAATCCGCG GTTATGACTC  
 3361 TCTTAAGAGA GTCATGAATT CGAGCTTCCA GAAGGTAATT ATCCAAGATG TAGCATCAAG  
 3421 AATCCAATGT TTACGGGAAA AACTATGGAA GTATTATGTG AGCTCAGCAA GAAGCAGATC  
 3481 AATATGCGGC ACATATGCAA CCTATGTTCA AAAATGAAGA ATGTACAGAT ACAAGATCCT  
 3541 ATACTGCCAG AATACGAAGA AGAATACGTA GAAATTGAAA AAGAAGAACC AGGCGAAGAA  
 3601 AAGAATCTTG AAGACGTAAG CACTGACGAC AACAAATGAAA AGAAGAAGAT AAGGTCGGTG  
 3661 ATTGTGAAAG AGACATAGAG GACACATGTA AGGTGGAAAA TGTAAGGCGG GAAAGTAACC  
 3721 TTATCACAAA GGAATCTTAT CCCCCACTAC TTATCCTTTT ATATTTTTC C GTGTCAATTT  
 3781 TGCCCTTGAG TTTTCCTATA TAAGGAACCA AGTTCGGCAT TTGTGAAAAC AAGAAAAAAT  
 3841 TTGGTGTAAG CTATTTTCTT TGAAGTACTG AGGATACAAC TTCAGAGAAA TTTGTAAGTT  
 3901 TGTGATCCAT GGTGAGCAAG GCGGAGGAGC TGTTACCCGG GGTGGTGCCC ATCCTGGTCG  
 3961 AGCTGGACGG CGACGTAAAC GGCCACAAGT TCAGCGTGTC CGGCGAGGGC GAGGGCGATG

**Supplemental Figure S10.** F-SHMT08cΔ+F284A-CDS, insert size, vector, restriction enzymes, and sequenced positive clones used for cloning.

|                                                                        |                                                                         |
|------------------------------------------------------------------------|-------------------------------------------------------------------------|
| 4021 CCACCTACGG CAAGCTGACC CTGAAGTTCA TCTGCACCAC CGGCAAGCTG CUCGTGCUCT | 5581 TAGGCCGCGA TTAAATTCCA ACATGGATGC TGATTTATAT GGGTATAAAT GGGCTCGCGA  |
| 4081 GGCCACCCCT CGTGACCACC TTCACCTACG GCGTGCAGTG CTTAGCCGCG TACCCCGACC | 5641 TAATGTCGGG CAATCAGGTG CGACAATCTA TCGATTGTAT GGAAGCCCG ATGCGCCAGA   |
| 4141 ACATGAAGCA GCACGACTTC TTCAAGTCCG CCATGCCCCG AGGCTACGTC CAGGAGCGCA | 5701 GTTGTCTCTG AAACATGGCA AAGGTAGCGT TGCCAATGAT GTTACAGATG AGATGGTCAG  |
| 4201 CCATCTTCTT CAAGGACGAC GGCAACTACA AGACCCGCGC CGAGGTGAAG TTCGAGGGCG | 5761 ACTAACTGG CTGACGGAAT TTATGCCTCT TCCGACCATC AAGCATTTTA TCCGTACTCC   |
| 4261 ACACCCTGGT GAACCGCATC GAGCTGAAGG GCATCGACTT CAAGGAGGAC GGCAACATCC | 5821 TGATGATGCA TGGTTACTCA CCACTGCGAT CCCCAGGAAA ACAGCATTTCC AGGTATTAGA |
| 4321 TGGGGCACAA GCTGGAGTAC AACTACAACA GCCACAACGT CTATATCATG GCCGACAAGC | 5881 AGAATATCCT GATTCAGGTG AAAATATTGT TGATGCGCTG GCAGTGTTCG TCGCCGGTT   |
| 4381 AGAAGAACGG CATCAAGGTG AACTTCAAGA TCCGCCACAA CATCGAGGAC GGCAGCGTGC | 5941 GCATTCGATT CCTGTTTGTA ATTGTCCTTT TAACAGCGAT CGCGTATTTT GTCTCGCTCA  |
| 4441 AGCTCGCCGA CCACTACCAG CAGAACACCC CCATCGGCGA CGGCCCGGTG CTGCTGCCCG | 6001 GGCACAATCA CGAATGAATA ACGGTTTGGT TGATGCGAGT GATTTTGATG ACGAGCGTAA  |
| 4501 ACAACCACTA CCTGAGCACC CAGTCCGCCG TGAGCAAAGA CCCCACGAG AAGCGCGATC  | 6061 TGGCTGGCCT GTTGAACAAG TCTGGAAAGA AATGCATAAA CTTTGTCCAT TCTCACCAGA  |
| 4561 ACATGGTCCT GCTGGAGTTC GTGACCGCCG CCGGGATCAC TCACGGCATG GACGAGCTGT | 6121 TTCAGTCGCT ACTCATGGTG ATTTCTCACT TGATAACCTT ATTTTGTACG AGGGGAAATT  |
| 4621 ACAAGTAAAG CGGCCGCCG GCTGCAGATC GTTCAAACAT TTGGCAATAA AGTTTCTTAA  | 6181 AATAGGTTGT ATTGATGTTG GACGAGTCGG AATCGCAGAC CGATACCAGG ATCTTGCCAT  |
| 4681 GATTGAATCC TGTTGCCGGT CTTGCGATGA TTATCATATA ATTTCTGTTG AATTACGTTA | 6241 CCTATGGAAC TGCCTCGGTG AGTTTTCTCC TTCATTACAG AAACGGCTTT TTCAAAAATA  |
| 4741 AGCATGTAAT AATTAACATG TAATGCATGA CGTTATTTAT GAGATGGGTT TTTATGATTA | 6301 TGGTATTGAT AATCCTGATA TGAATAAATT GCAGTTTCAT TTGATGCTCG ATGAGTTTTT  |
| 4801 GAGTCCCGCA ATTATACATT TAATACGCGA TAGAAAACAA AATATAGCGC GCAAACTAGG | 6361 CTAAGAATTA ATTCATGATC CTGCATGACC AAAATCCCTT AACGTGAGTT TTCGTTCCAC  |
| 4861 ATAAATTATC GCGCGCGGTG TCATCTATGT TACTAGATCC GATGATAAGC TGTCAAACAT | 6421 TGAGCGTCAG ACCCCGTAAG AAAGATCAAA GGATCTTCTT GAGATCCTTT TTTTCTGCGC  |
| 4921 GAGAATTAAT TCGTAATCAT GTCATAGCTG TTTCTGTGT GAAATTGTTA TCCGCTCACA  | 6481 GTAATCTGCT GCTTGCAAAC AAAAAACCA CCGCTACCAG CGGTGGTTTG TTTGCCGGAT   |
| 4981 ATTCCACACA ACATACGAGC CGGAAGCATA AAGTGTAAG CCTGGGGTGC CTAATGAGTG  | 6541 CAAGAGCTAC CAACTCTTTT TCCGAAGGTA ACTGGCTTCA GCAGAGCGCA GATACCAAAT  |
| 5041 AGCTAACTCA CATTAAATTG GTTGCGCTCA CTGCCCCTT TCCAGTCGGG AAACCTGTCG  | 6601 ACTGTCCTTC TAGTGTAGCC GTAGTTAGGC CACCACTTCA AGAACTCTGT AGCACCGCCT  |
| 5101 TGCCAGCTGC ATTAATGAAT CGGCCAACGC GCGGGGAGAG GCGGTTTGCG TATTGGCTAG | 6661 ACATACCTCG CTCTGCTAAT CCTGTTACCA GTGGCTGCTG CCAGTGGCGA TAAGTCGTGT  |
| 5161 AGCAATTTCG CGTTAATTCA GTACATTAAA AACGTCCGCA ATGTGTTATT AAGTTGTCTA | 6721 CTTACCGGGT TGGACTCAAG ACGATAGTTA CCGGATAAGG CGCAGCGGTC GGGCTGAACG  |
| 5221 AGCGTCAATT TGTTTACACC ACAATATATC CTGCCACCAG CCAGCCAACA GCTCCCCGAC | 6781 GGGGGTTCTG GCACACAGCC CAGCTTGAG CGAACGACCT ACACCGAACT GAGATACCTA   |
| 5281 CGGCAGCTCG GCACAAAATC ACCACTCGAT ACAGGCAGCC CATCAGTCCG GGACGGCGTC | 6841 CAGCGTGAGC TATGAGAAAG CGCCACGCTT CCCGAAGGGA GAAAGGCGGA CAGGTATCCG  |
| 5341 AGCGGGAGAG CCGTTGTAAG GCGGCAGACT TTGCTCATGT TACCGATGCT ATTGCGAAGA | 6901 GTAAGCGGCA GGGTCGGAAC AGGAGAGCGC ACGAGGGAGC TTCCAGGGGG AAACGCCTGG  |
| 5401 ACGGCAACTA AGCTGCCGGG TTTGAAACAC GGATGATCTC GCGGAGGGTA GCATGTTGAT | 6961 TATCTTTATA GTCCTGTGCG GTTTCGCCAC CTCTGACTTG AGCGTCGATT TTTGTGATGC  |
| 5461 TGTAACGATG ACAGAGCGTT GCTGCCTGTG ATCCAGATCA TGAACAATAA AACTGTCTGC | 7021 TCGTCAGGGG GGCGGAGCCT ATGGAAAAAC GCCAGCAACG CGGCCTTTTT ACGGTTCTCTG |
| 5521 TTACATAAAC AGTAATACAA GGGGTGTTAT GAGCCATATT CAACGGGAAA CGTCTTGCTC | 7081 GCCTTTTGCT GGCCTTTTGC TCACATGTTT TTTCTGCGT TATCCCTGA TTCTGTGGAT    |

**Supplemental Figure S10.** F-SHMT08cΔ+F284A-CDS, insert size, vector, restriction enzymes, and sequenced positive clones used for cloning.

|                                                                         |                                                                         |
|-------------------------------------------------------------------------|-------------------------------------------------------------------------|
| 7141 AACCGTATTA CCGCCTTTGA GTGAGCTGAT ACCGCTCGCC GCAGCCGAAC GACCGAGCGC  | 8701 TCGTAGCGGA TCACCTCGCC AGCTCGTCGG TCACGCTTCG ACAGACGGAA AACGGCCACG  |
| 7201 AGCGAGTCAG TGAGCGAGGA AGCGGAAGAG CGCCTGATGC GGTATTTTCT CTTTACGCAT  | 8761 TCCATGATGC TGCAGCTATC GCGGGTGCCC ACGTCATAGA GCATCGGAAC GAAAAATCT   |
| 7261 CTGTGCGGTA TTTCACACCG CATATGGTGC ACTCTCAGTA CAATCTGCTC TGATGCCGCA  | 8821 GGTGTGCTCGT CGCCCTTGGG CGGCTTCCTA ATCGACGGCG CACCGGCTGC CGCGGGTTGC |
| 7321 TAGTTAAGCC AGTATACACT CCGCTATCGC TACGTGACTG GGTTCATGGCT GCGCCCCGAC | 8881 CGGGATTCTT TCGGGATTTC ATCAGCGGCC GCTTGCCACG ATTCACCGGG GCGTGTCTCT  |
| 7381 ACCCGCCAAC ACCCGCTGAC GCGCCCTGAC GGGCTTGTCT GCTCCCGGCA TCCGCTTACA  | 8941 GCCTCGATGC GTTGCCCGTG GCGGCGCTGC GCGGCCTTCA ACTTCTCCAC CAGGTCATCA  |
| 7441 GACAAGCTGT GACCGTCTCC GGGAGCTGCA TGTGTCAGAG GTTTTCACCG TCATCACCGA  | 9001 CCCAGCGCCG CGCCGATTTC TACCGGGCCG GATGGTTTGC GACCGTCACG CCGATTCTCT  |
| 7501 AACCGCGGAG GCAGGGTGCC TTGATGTGGG CGCCGCGGCT CGAGTGCGCA CGGCGCGGCT  | 9061 GGGCTTGGGG GTTCCAGTGC CATTGCAGGG CCGGCAGACA ACCCAGCCGC TTACGCCTGG  |
| 7561 TGTCCGCGCC CTGGTAGATT GCCTGGCCGT AGGCCAGCCA TTTTGTAGCG GCCAGCGGCC  | 9121 CCAACCGCCC GTTCCTCCAC ACATGGGGCA TTCCACGGCG TCGGTGCCTG GTTGTCTTGG  |
| 7621 GCGATAGGCC GACGCGAAGC GCGGGGGCGT AGGGAGCGCA GCGACCGAAG GGTAGGCGCT  | 9181 ATTTTCCATG CCGCCTCCTT TAGCCGCTAA AATTCATCTA CTCATTATT CATTTGCTCA   |
| 7681 TTTTGCAGCT CTTGCGGTGT GCGCTGGCCA GACAGTTATG CACAGGCCAG GCGGGTTTTA  | 9241 TTTACTCTGG TAGTGCAGCG ATGTATTTCAG ATAGCAGCTC GGTAATGGTC TTGCCTTGGC |
| 7741 AGAGTTTTAA TAAGTTTTAA AGAGTTTTAG GCGGAAAAAT CGCCTTTTTT CTCTTTTATA  | 9301 GTACCGCGTA CATCTTCAGC TTGGTGTGAT CCTCCGCCGG CAACTGAAAG TTGACCCGCT  |
| 7801 TCAGTCACTT ACATGTGTGA CCGGTTCCCA ATGTACGGCT TTGGGTTCCC AATGTACGGG  | 9361 TCATGGCTGG CGTGTCCTGCC AGGCTGGCCA ACGTTGCAGC CTTGCTGCTG CGTGCGCTCG |
| 7861 TTCCGGTTCC CAATGTACGG CTTTGGGTTC CCAATGTACG TGCTATCCAC AGGAAAGAGA  | 9421 GACGGCCGGC ACTTAGCGTG TTTGTGCTTT TGCTCATTTT CTCTTTACCT CATTAACTCA  |
| 7921 CCTTTTCGAC CTTTTTCCCC TGCTAGGGCA ATTTGCCCTA GCATCTGCTC CGTACATTAG  | 9481 AATGAGTTTT GATTTAATTT CAGCGGCCAG CGCCTGGACC TCGCGGGCAG CGTCGCCCTC  |
| 7981 GAACCGGCGG ATGCTTCGCC CTCGATCAGG TTGCGGTAGC GCATGACTAG GATCGGGCCA  | 9541 GGGTTCTGAT TCAAGAACGG TTGTGCCGGC GCGGCGAGTG CCTGGGTAGC TCACGCGCTG  |
| 8041 GCCTGCCCCG CCTCCTCCTT CAAATCGTAC TCCGGCAGGT CATTTGACCC GATCAGCTTG  | 9601 CGTGATACGG GACTCAAGAA TGGGCAGCTC GTACCCGGCC AGCGCCTCGG CAACCTCACC  |
| 8101 CGCACGGTGA AACAGAACTT CTTGAACCTC CCGGCGCTGC CACTGCGTTC GTAGATCGTC  | 9661 GCCGATGCGC GTGCCCTTGA TCGCCCGCGA CACGACAAAG GCCGCTTGTA GCCTTCCATC  |
| 8161 TTGAACAACC ATCTGGCTTC TGCCTTGCTT GCGGCGCGGC GTGCCAGGCG GTAGAGAAAA  | 9721 CGTGACCTCA ATGCGCTGCT TAACCAGCTC CACCAGGTCG GCGGTGGCCC ATATGTCGTA  |
| 8221 CGGCCGATGC CGGGATCGAT CAAAAAGTAA TCGGGGTGAA CCGTCAGCAC GTCCGGGTTC  | 9781 AGGGCTTGCC TGCACCGGAA TCAGCACGAA GTCGCTGCC TTGATCGCGG ACACAGCCAA   |
| 8281 TTGCCCTTCTG TGATCTCGCG GTACATCCAA TCAGCTAGCT CGATCTCGAT GTAATCCGGC | 9841 GTCCCGCGCC TGGGGCGCTC CGTCGATCAC TACGAAGTCG CGCCGGCCGA TGGCCTTCAC  |
| 8341 CGCCCGGTTT CGCTCTTTAC GATCTTGTAG CGGCTAATCA AGGCTTCACC CTCGGATACC  | 9901 GTCGCGGTCA ATCGTCGGGC GGTGATGCC GACAACGGTT AGCGGTTGAT CTTCCCGCAC   |
| 8401 GTCACCAGGC GGCCGTTCTT GGCCTTCTTC GTACGCTGCA TGGCAACGTG CGTGGTGTTC  | 9961 GGCCGCCCAA TCGCGGGCAC TGCCCTGGGG ATCGGAATCG ACTAACAGAA CATCGGCCCC  |
| 8461 AACCGAATGC AGGTTTCTAC CAGGTCGTCT TTCTGTCTTC CGCCATCGGC TCGCCGGCAG  | 10021 GGCGAGTTGC AGGGCGCGGG CTAGATGGGT TGCGATGGTC GTCTTGCTTG ACCCGCCTTT |
| 8521 AACTTGAGTA CGTCCGCAAC GTGTGGACGG AACACGCGGC CGGGCTTGTC TCCCTTCCCT  | 10081 CTGGTTAAGT ACAGCGATAA CCTTCATGCG TTCCCTTTGC GTATTGTGTT ATTTACTCAT |
| 8581 TCCCGGTATC GGTTCATGGA TTCGGTTAGA TGGGAAACCG CCATCAGTAC CAGGTCGTAA  | 10141 CGCATCATAT ACGCAGCGAC CGCATGACGC AAGCTGTTTT ACTCAAATAC ACATCACCTT |
| 8641 TCCACACAC TGGCCATGCC GGCCGGCCCT GCGGAAACCT CTACGTGCCC GTCTGGAAGC   | 10201 TTTAGACGGC GCGCTCGGT TTCTTCAGCG GCCAAGCTGG CCGGCCAGGC CGCCAGCTTG  |

**Supplemental Figure S10.** F-SHMT08cΔ+F284A-CDS, insert size, vector, restriction enzymes, and sequenced positive clones used for cloning.

```

10261 GCATCAGACA AACCGGCCAG GATTTTCATGC AGCCGCACGG TTGAGACGTG CGCGGGCGGC
10321 TCGAACACGT ACCCGGCCGC GATCATCTCC GCCTCGATCT CTTCCGTAAT GAAAAACGGT
10381 TCGTCCTGGC CGTCCTGGTG CGGTTTCATG CTTGTTCTC TTGGCGTTCA TTCTCGGCGG
10441 CCGCCAGGGC GTCGGCCTCG GTCAATGCGT CCTCACGGAA GGCACCGCGC CGCCTGGCCT
10501 CGGTGGGCGT CACTTCCTCG CTGCGCTCAA GTGCGCGGTA CAGGGTCGAG CGATGCACGC
10561 CAAGCAGTGC AGCCGCCTCT TTCACGGTGC GGCCTTCCTG GTCGATCAGC TCGCGGGCGT
10621 GCGCGATCTG TGCCGGGGTG AGGGTAGGGC GGGGGCCAAA CTTACGCCT CGGGCCTTGG
10681 CGGCCTCGCG CCCGCTCCGG GTGCGGTCGA TGATTAGGGA ACGCTCGAAC TCGGCAATGC
10741 CGGCGAACAC GGTCAACACC ATGCGGCCGG CCGGCGTGGT GGTGTCGGCC CACGGCTCTG
10801 CCAGGCTACG CAGGCCCCGCG CCGGCCTCCT GGATGCGCTC GGCAATGTCC AGTAGGTCGC
10861 GGGTGCTGCG GGCCAGGCGG TCTAGCCTGG TCACTGTCAC AACGTCGCCA GGGCGTAGGT
10921 GGTCAAGCAT CCTGGCCAGC TCCGGGCGGT CGCGCCTGGT GCCGGTGATC TTCTCGGAAA
10981 ACAGCTTGGT GCAGCCGGCC GCGTGAGTT CGGCCCCTTG GTTGGTCAAG TCCTGGTCGT
11041 CGGTGCTGAC GCGGGCATAG CCCAGCAGGC CAGCGGCGGC GCTCTTGTTT ATGGCGTAAT
11101 GTCTCCGTT CTAGTCGCAA GTATTCTACT TTATGCGACT AAAACACGCG ACAAGAAAA
11161 GCCAGGAAAA GGGCAGGGCG GCAGCCTGTC GCGTAACTTA GGAATTGTGC GACATGTCGT
11221 TTTCAGAAGA CGGCTGCACT GAACGTCAGA AGCCGACTGC ACTATAGCAG CGGAGGGGTT
11281 GGATCAAAGT ACT

```

**Gene Name** F-SHMT08cΔ+N374A-CDS

**Cloning Vector** pG2RNAi2

**Length (bp)** 1430

**Cloning Sites** Ascl-AvrII

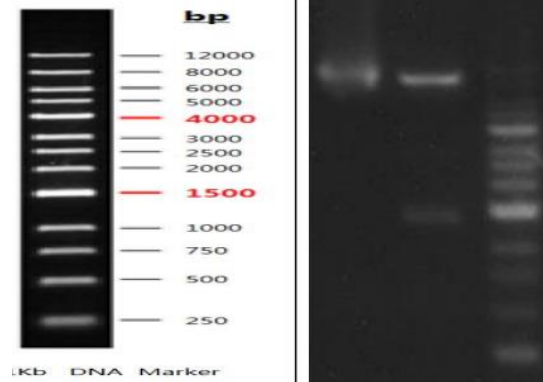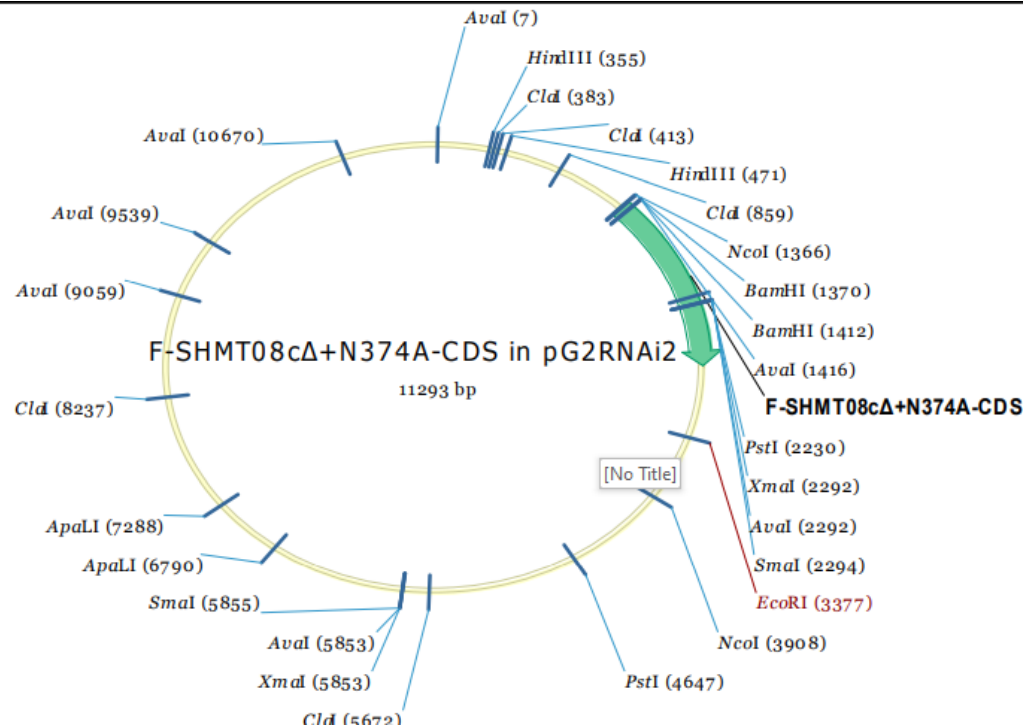

**Supplemental Figure S11.** F-SHMT08cΔ+N374A-CDS, insert size, vector, restriction enzymes, and sequenced positive clones used for cloning.

## Detailed Sequence of the Whole Construct:

```
1  TTGATCCCGA GGGGAACCCT GTGGTTGGCA TGCACATACA AATGGACGAA CGGATAAACC
61  TTTTCACGCC CTTTTAAATA TCCGTTATTC TAATAAACGC TCTTTTCTCT TAGGTTTACC
121 CGCCAATATA TCCTGTCAAA CACTGATAGT TTAAACTGAA GGCGGGAAAC GACAATCTGA
181 TCCAAGCTCA AGCTCATTCG CCATTCAGGC TGCGCAACTG TTGGGAAGGG CGATCGGTGC
241 GGGCCTCTTC GCTATTACGC CAGCTGGCGA AAGGGGGATG TGCTGCAAGG CGATTAAGTT
301 GGGTAACGCC AGGGTTTTCC CAGTCACGAC GTTGTAAAAC GACGGCCAGT GCCAAGCTTA
361 TTACCCTGTT ATCCCTAGAT ATCGATTTTG GCTACCTTAA GGTAGCCAAA ATCGATCACT
421 AGTGCGGCCG CGGGCCCAAT ATAACAACGA CGTCGTAACA GATAAAGCGA AGCTTGAAGG
481 TGCATGTGAC TCCGTCAAGA TTACGAAACC GCCAACTACC ACGCAAATTG CAATTCTCAA
541 TTTCTAGAA GGACTCTCCG AAAATGCATC CAATACCAA TATTACCCGT GTCATAGGCA
601 CCAAGTGACA CCATACATGA ACACGCGTCA CAATATGACT GGAGAAGGGT TCCACACCTT
661 ATGCTATAAA ACGCCCCACA CCCCTCCTCC TTCCTTCGCA GTTCAATTCC AATATATTCC
721 ATTCTCTCTG TGTATTTCCC TACCTCTCCC TTCAAGGTTA GTCGATTTCT TCTGTTTTTC
781 TTCTTCGTTC TTTCCATGAA TTGTGTATGT TCTTTGATCA ATACGATGTT GATTTGATTG
841 TGTTTTGTTT GGTTTCATCG ATCTTCAATT TTCATAATCA GATTCAGCTT TTATTATCTT
```

|                                                                         |                                                                         |
|-------------------------------------------------------------------------|-------------------------------------------------------------------------|
| 901 TACAACAACG TCCTTAATTT GATGATTCTT TAATCGTAGA TTTGCTCTAA TTAGAGCTTT   | 2461 TCTCTGTAAC ATTACTGTTA ACAAGGCTGC TGTTTTTGTT GATAGCAGTG CCTTGCCCC   |
| 961 TTCATGTCAG ATCCCTTTAC AACAGCCTT AATTGTTGAT TCATTAATCG TAGATTAGGG    | 2521 TGGTGGAGTG CGAATTGGTG CCCCTGCCAT GACTTCTAGG GGTTTGGTTG AAAAAGACTT  |
| 1021 CTTTTTTCAT TGATTACTTC AGATCCGTTA AACGTAACCA TAGATCAGGG CTTTTTCATG  | 2581 TGAGCAGATT GGTGAGTTCC TTCACCGTGC TGTGACTCTC AACTGGAGA TCCAGAAGGA   |
| 1081 AATTACTTCA GATCCGTAA ACAACAGCCT TATTTTTTAT ACTTCTGTGG TTTTCAAGA    | 2641 GCATGGCAAA CTTCTCAAGG ATTTCAACAA GGGTCTCGTC AACACAAGG CTATTGAAGA   |
| 1141 AATTGTTTCA ATCCGTTGAC AAAAAGCCTT ATTCGTTGAT TCTATATCGT TTTTCGAGAG  | 2701 TCTCAAAGCT GATGTTGAGA AGTTCCTGTC CTTGTTTGAC ATGCCTGGCT TCCTGGTATC  |
| 1201 ATATTGCTCA GATCTGTTAG CAACTGCCTT GTTTGTTGAT TCTATTGCCG TGGATTAGGG  | 2761 TGAATGAAG TACAAGGATT AGCCTAGGTT CGAGTATTAT GGCATTGGGA AAAGTGT      |
| 1261 TTTTTTTTCA CGAGATTGCT TCAGATCCGT ACTTAAGATT ACGTAATGGA TTTTGATTCT  | 2821 TCTTGTACCA TTTGTTGTGC TTGTAATTTA CTGTGTTTTT TATTCGGTTT TCGCTATCGA  |
| 1321 GATTTATCTG TGATTGTTGA CTCGACAGCG GCCGCACCGG CGCGCCATGG ATCCAGTAAG  | 2881 ACTGTGAAAT GGAAATGGAT GGAGAAGAGT TAATGAATGA TATGGTCCTT TTGTTTATTC  |
| 1381 CGTGTGGGGT AACACGCCCT TGGCGACGGT GGATCCCAG ATCCATGACC TCATCGAGAA   | 2941 TCAAATTAAT ATTATTTGTT TTTTCTCTTA TTTGTTGTGT GTTGAATTTG AAATTATAAG  |
| 1441 GGAGAAGCGC CGTCAATGCC GCGGAATCGA GCTCATCGCC TCCGAGAACT TCACCTCCTT  | 3001 AGATATGCAA ACATTTTGTT TTGAGTAAAA ATGTGTCAAA TCGTGGCCTC TAATGACCGA  |
| 1501 CGCCGTCATC GAGGCCCTCG GCAGCGCTCT CACGAACAAA TACTCCGAGG GCATGCCGGG  | 3061 AGTTAATATG AGGAGTAAAA CACTTGTAAGT TGTACCATTA TGCTTATTCA CTAGGCAACA |
| 1561 CAACCGCTAC TACGGCGGCA ATGAATACAT CGACCAGATC GAAAACCTCT GCCGCTCACG  | 3121 AATATATTTT CAGACCTAGA AAAGCTGCAA ATGTTACTGA ATACAAGTAT GTCCTCTTGT  |
| 1621 GCCCCTCCAA GCCTTCCACC TCGACGCCA ATCCTGGGGC GTCAACGTCC AGCCCTACTC   | 3181 GTTTTAGACA TTTATGAAGT TTCCTTTATG TAATTTTCCA GAATCCTTGT CAGATTCTAA  |
| 1681 CGGCTCCCCG GCCAACTTCG CCGCTACAC CGCGCTCCTC AACCCCCACG ACCGCATCAT   | 3241 TCATTGCTTT ATAATTATAG TTATACTCAT GGATTGTAG TTGAGTATGA AAATATTTTT   |
| 1741 GGGGCTAGAT CTCGCTCCG GCGGCCACCT CACCCACGGC TACTACACCT CCGGCGGAAA   | 3301 TAATGCATTT TATGACTTGC CAATTGATTG ACAACATGCA TCAATCCGCG GTTATGACTC  |
| 1801 GAAGATCTCC GCCACCTCCA TTTACTTCGA GAGTCTCCCT TACAAGGTAA ACTCCACCAC  | 3361 TCTTAAGAGA GTCATGAATT CGAGCTTCCA GAAGTAATT ATCCAAGATG TAGCATCAAG   |
| 1861 CGGCTACATC GACTACGACC GCTTGGAAGA AAAAGCCCTA GACTTCAGGC CAAAACATCAT | 3421 AATCCAATGT TTACGGGAAA AACTATGGAA GTATTATGTG AGCTCAGCAA GAAGCAGATC  |
| 1921 AATCTGCGGT GGCAGCGCGT ACCCTCGCGA TTGGGACTAC AAACGTTTCA GGGAAGTCGC  | 3481 AATATGCGGC ACATATGCAA CCTATGTTCA AAAATGAAGA ATGTACAGAT ACAAGATCCT  |
| 1981 TGATAAGTGC GGAGCATTGC TTCTCTGCGA CATGGCGCAC ACTAGCGGCC TTGTGGCCGC  | 3541 ATACTGCCAG AATACGAAGA AGAATACGTA GAAATTGAAA AAGAAGAACC AGGCGAAGAA  |
| 2041 CGAGGAAGTG AACAGCCCTT TCGAGTATTG CGACATTGTG ACCACCACGA CTCACAAGAG  | 3601 AAGAATCTTG AAGACGTAAG CACTGACGAC AACATGAAA AGAAGAAGAT AAGGTCGGTG   |
| 2101 CTTGCGGGGC CCACGTGCGG GGATGATCTT TTACCGGAAG GGCCCCAAGC CGCCGAAGAA  | 3661 ATTGTGAAAG AGACATAGAG GACACATGTA AGGTGGAATA TGTAAGGGCG GAAAGTAACC  |
| 2161 GGGGCAGCCG GAGAACGCGG TTTATGATTT CGAGGACAAG ATTAACCTTCG CGGTGTTCCC | 3721 TTATCACAAA GGAATCTTAT CCCCCACTAC TTATCCTTTT ATATTTTTCG GTGTCATTTT  |
| 2221 TTCGCTGCAG GGTGGGCCCC ACAACCACCA GATCGGTGCT CTCGCGGTGG CGCTGAAGCA  | 3781 TGCCCTTGAG TTTTCTTATA TAAGGAACCA AGTTCGGCAT TTGTGAAAAC AAGAAAAAAT  |
| 2281 GGCCGCGTCG CCCGGGTTTA AGGCCTACGC GAAGCAGGTT AAGGCGAAGC CCGTTGCGCT  | 3841 TTGGTGTAAG CTATTTTCTT TGAAGTACTG AGGATACAAC TTCAGAGAAA TTTGTAAGTT  |
| 2341 TGGAAAATAC TTGATGGGGA AAGGTACAG CCTTGTCACT GCGGAACAG AGAACCATCT    | 3901 TGTGATCCAT GGTGAGCAAG GCGGAGGAGC TGTTCACCGG GGTGGTGCCC ATCCTGGTCG  |
| 2401 TGTTTTGTGG GATCTGAGAC CTCTTGATT GACTGGGTAT AAGGTGAGAA AACTCTGTGA   | 3961 AGCTGGACGG CGACGTAAAC GGCCACAAGT TCAGCGTGTC CGGCGAGGGC GAGGGCGATG  |

**Supplemental Figure S11.** F-SHMT08cΔ+N374A-CDS, insert size, vector, restriction enzymes, and sequenced positive clones used for cloning.

|                                                                        |                                                                         |
|------------------------------------------------------------------------|-------------------------------------------------------------------------|
| 4021 CCACCTACGG CAAGCTGACC CTGAAGTTCA TCTGCACCAC CGGCAAGCTG CUCGTGCCCT | 5581 TAGGCCGCGA TTAAATTCCA ACATGGATGC TGATTTATAT GGGTATAAAT GGGCTCGCGA  |
| 4081 GGCCACCCCT CGTGACCACC TTCACCTACG GCGTGCAGTG CTTAGCCGCG TACCCCGACC | 5641 TAATGTCGGG CAATCAGGTG CGACAATCTA TCGATTGTAT GGAAGCCCG ATGCGCCAGA   |
| 4141 ACATGAAGCA GCACGACTTC TTCAAGTCCG CCATGCCCCG AGGCTACGTC CAGGAGCGCA | 5701 GTTGTCTCTG AAACATGGCA AAGGTAGCGT TGCCAATGAT GTTACAGATG AGATGGTCAG  |
| 4201 CCATCTTCTT CAAGGACGAC GGCAACTACA AGACCCGCGC CGAGGTGAAG TTCGAGGGCG | 5761 ACTAACTGG CTGACGGAAT TTATGCCTCT TCCGACCATC AAGCATTTTA TCCGTACTCC   |
| 4261 ACACCCTGGT GAACCGCATC GAGCTGAAGG GCATCGACTT CAAGGAGGAC GGCAACATCC | 5821 TGATGATGCA TGGTTACTCA CCACTGCGAT CCCCAGGAAA ACAGCATTTCC AGGTATTAGA |
| 4321 TGGGGCACA GCTGGAGTAC AACTACAACA GCCACAACGT CTATATCATG GCCGACAAGC  | 5881 AGAATATCCT GATTCAGGTG AAAATATTGT TGATGCGCTG GCAGTGTTC TGCGCCGGTT   |
| 4381 AGAAGAACGG CATCAAGGTG AACTTCAAGA TCCGCCACAA CATCGAGGAC GGCAGCGTGC | 5941 GCATTCGATT CCTGTTTGTA ATTGTCCTTT TAACAGCGAT CGCGTATTTT GTCTCGCTCA  |
| 4441 AGCTCGCCGA CCACTACCAG CAGAACACCC CCATCGGCGA CGGCCCGGTG CTGCTGCCCG | 6001 GGCACAATCA CGAATGAATA ACGGTTTGGT TGATGCGAGT GATTTTGATG ACGAGCGTAA  |
| 4501 ACAACCACTA CCTGAGCACC CAGTCCGCCG TGAGCAAAGA CCCCACGAG AAGCGCGATC  | 6061 TGGCTGGCCT GTTGAACAAG TCTGGAAAGA AATGCATAAA CTTTGGCCAT TCTCACCGBA  |
| 4561 ACATGGTCCT GCTGGAGTTC GTGACCGCCG CCGGATCAC TCACGGCATG GACGAGCTGT  | 6121 TTCAGTCGTC ACTCATGGTG ATTTCTCACT TGATAACCTT ATTTTGGACG AGGGGAAATT  |
| 4621 ACAAGTAAAG CGGCCGCCG GCTGCAGATC GTTCAAACAT TTGGCAATAA AGTTTCTTAA  | 6181 AATAGGTTGT ATTGATGTTG GACGAGTCGG AATCGCAGAC CGATACCAGG ATCTTGCCAT  |
| 4681 GATTGAATCC TGTTGCCGGT CTTGCGATGA TTATCATATA ATTTCTGTTG AATTACGTTA | 6241 CCTATGGAAC TGCCTCGGTG AGTTTTCTCC TTCATTACAG AAACGGCTTT TTCAAAAATA  |
| 4741 AGCATGTAAT AATTAACATG TAATGCATGA CGTTATTTAT GAGATGGGTT TTTATGATTA | 6301 TGGTATTGAT AATCCTGATA TGAATAAATT GCAGTTTCAT TTGATGCTCG ATGAGTTTTT  |
| 4801 GAGTCCCGCA ATTATACATT TAATACGCGA TAGAAAACAA AATATAGCGC GCAAACTAGG | 6361 CTAAGAATTA ATTCATGATC CTGCATGACC AAAATCCCTT AACGTGAGTT TTCGTTCCAC  |
| 4861 ATAAATTATC GCGCGCGGTG TCATCTATGT TACTAGATCC GATGATAAGC TGTCAAACAT | 6421 TGAGCGTCAG ACCCCGTAGA AAAGATCAAA GGATCTTCTT GAGATCCTTT TTTTCTGCGC  |
| 4921 GAGAATTAAT TCGTAATCAT GTCATAGCTG TTTCTGTGT GAAATTGTTA TCCGCTCACA  | 6481 GTAATCTGCT GCTTGCAAAC AAAAAACCA CCGCTACCAG CGGTGGTTTG TTTGCCGGAT   |
| 4981 ATTCCACACA ACATACGAGC CGGAAGCATA AAGTGTAAG CCTGGGGTGC CTAATGAGTG  | 6541 CAAGAGCTAC CAACTCTTTT TCCGAAGGTA ACTGGCTTCA GCAGAGCGCA GATACCAAAT  |
| 5041 AGCTAACTCA CATTAAATGC GTTGCGCTCA CTGCCCCTT TCCAGTCGGG AAACCTGTCTG | 6601 ACTGTCCTTC TAGTGTAGCC GTAGTTAGGC CACCACTTCA AGAACTCTGT AGCACCGCCT  |
| 5101 TGCCAGCTGC ATTAATGAAT CGGCCAACGC GCGGGGAGAG GCGGTTTGC TATTGGCTAG  | 6661 ACATACCTCG CTCTGCTAAT CCTGTTACCA GTGGCTGCTG CCAGTGGCGA TAAGTCGTGT  |
| 5161 AGCAATTCGG CGTTAATTCA GTACATTAAA AACGTCCGCA ATGTGTTATT AAGTTGTCTA | 6721 CTTACCGGGT TGGACTCAAG ACGATAGTTA CCGGATAAGG CGCAGCGGTC GGGCTGAACG  |
| 5221 AGCGTCAATT TGTTTACACC ACAATATATC CTGCCACCAG CCAGCCAACA GCTCCCCGAC | 6781 GGGGGTTCTG GCACACAGCC CAGCTTGGAG CGAACGACCT ACACCGAACT GAGATACCTA  |
| 5281 CGGCAGCTCG GCACAAAATC ACCACTCGAT ACAGGCAGCC CATCAGTCCG GGACGGCGTC | 6841 CAGCGTGAGC TATGAGAAAAG CGCCACGCTT CCCGAAGGGA GAAAGGCGGA CAGGTATCCG |
| 5341 AGCGGGAGAG CCGTTGTAAG GCGGCAGACT TTGCTCATGT TACCGATGCT ATTGCGAAGA | 6901 GTAAGCGGCA GGGTCGGAAC AGGAGAGCGC ACGAGGGAGC TTCCAGGGGG AAACGCTGG   |
| 5401 ACGGCAACTA AGCTGCCGGG TTTGAAACAC GGATGATCTC GCGGAGGGTA GCATGTTGAT | 6961 TATCTTTATA GTCCTGTGCG GTTTCGCCAC CTCTGACTTG AGCGTCGATT TTTGTGATGC  |
| 5461 TGTAACGATG ACAGAGCGTT GCTGCCTGTG ATCCAGATCA TGAACAATAA AACTGTCTGC | 7021 TCGTCAGGGG GGCGGAGCCT ATGGAAAAAC GCCAGCAACG CGGCCTTTTT ACGGTTCTCTG |
| 5521 TTACATAAAC AGTAATACAA GGGGTGTTAT GAGCCATATT CAACGGGAAA CGTCTTGCTC | 7081 GCCTTTTGCT GGCCTTTTGC TCACATGTTT TTTCTGCGT TATCCCTGA TTCTGTGGAT    |

**Supplemental Figure S11.** F-SHMT08cΔ+N374A-CDS, insert size, vector, restriction enzymes, and sequenced positive clones used for cloning.

|                                                                         |                                                                         |
|-------------------------------------------------------------------------|-------------------------------------------------------------------------|
| 7141 AACCGTATTA CCGCCTTTGA GTGAGCTGAT ACCGCTCGCC GCAGCCGAAC GACCGAGCGC  | 8701 TCGTAGCGGA TCACCTCGCC AGCTCGTCGG TCACGCTTCG ACAGACGGAA AACGGCCACG  |
| 7201 AGCGAGTCAG TGAGCGAGGA AGCGGAAGAG CGCCTGATGC GGTATTTTCT CTTTACGCAT  | 8761 TCCATGATGC TGCAGCTATC GCGGGTGCCC ACGTCATAGA GCATCGGAAC GAAAAATCT   |
| 7261 CTGTGCGGTA TTTCACACCG CATATGGTGC ACTCTCAGTA CAATCTGCTC TGATGCCGCA  | 8821 GGTGTGCTCGT CGCCCTTGGG CGGCTTCCTA ATCGACGGCG CACCGGTGTC CGCGGGTTGC |
| 7321 TAGTTAAGCC AGTATACACT CCGCTATCGC TACGTGACTG GGTTCATGGCT GCGCCCCGAC | 8881 CGGGATTCTT TCGGGATTTC ATCAGCGGCC GCTTGCCACG ATTCACCGGG GCGTGCTTCT  |
| 7381 ACCCGCCAAC ACCCGCTGAC GCGCCCTGAC GGGCTTGTCT GCTCCCGGCA TCCGCTTACA  | 8941 GCCTCGATGC GTTGCCCGTG GCGGCGCTGC GCGGCCTTCA ACTTCTCCAC CAGGTCATCA  |
| 7441 GACAAGCTGT GACCGTCTCC GGGAGCTGCA TGTGTCAGAG GTTTTCACCG TCATCACCGA  | 9001 CCCAGCGCCG CGCCGATTTC TACCGGGCCG GATGTTTTGC GACCGTCACG CCGATTCTCT  |
| 7501 AACGCGCGAG GCAGGGTGCC TTGATGTGGG CGCCGCGGCT CGAGTGCGCA CGGCGCGGCT  | 9061 GGGCTTGGGG GTTCCAGTGC CATTGCAGGG CCGCGAGACA ACCAGCGCCG TTACGCCTGG  |
| 7561 TGTCCGCGCC CTGGTAGATT GCCTGGCCGT AGGCCAGCCA TTTTGTAGCG GCCAGCGGCC  | 9121 CCAACCGCCC GTTCCTCCAC ACATGGGGCA TTCCACGGCG TCGGTGCCTG GTTGTCTTGG  |
| 7621 GCGATAGGCC GACGCGAAGC GCGGGGGCGT AGGGAGCGCA GCGACCGAAG GGTAGGCGCT  | 9181 ATTTTCCATG CCGCCTCCTT TAGCCGCTAA AATTCATCTA CTCATTATT CATTTGCTCA   |
| 7681 TTTTGCAGCT CTTGCGGTGT GCGCTGGCCA GACAGTTATG CACAGGCCAG GCGGGTTTTA  | 9241 TTTACTCTGG TAGTGCGCG ATGTATTGAG ATAGCAGCTC GGTAATGGTC TTGCCTTGGC   |
| 7741 AGAGTTTTAA TAAGTTTTAA AGAGTTTTAG GCGGAAAAAT CGCCTTTTTT CTCTTTTATA  | 9301 GTACCGCGTA CATCTTCAGC TTGGTGTGAT CCTCCGCCGG CAACTGAAAG TTGACCGCT   |
| 7801 TCAGTCACTT ACATGTGTGA CCGGTTCCCA ATGTACGGCT TTGGGTTCCC AATGTACGGG  | 9361 TCATGGCTGG CGTGCTGCGC AGGCTGGCCA ACGTTGCAGC CTTGCTGCTG CGTGCGCTCG  |
| 7861 TTCCGGTTCC CAATGTACGG CTTTGGGTTC CCAATGTACG TGCTATCCAC AGGAAAGAGA  | 9421 GACGGCCGGC ACTTAGCGTG TTTGTGCTTT TGCTCATTTT CTCTTTACCT CATTAACTCA  |
| 7921 CCTTTTCGAC CTTTTTCCCC TGCTAGGGCA ATTTGCCCTA GCATCTGCTC CGTACATTAG  | 9481 AATGAGTTTT GATTTAATTT CAGCGGCCAG CGCCTGGACC TCGCGGGCAG CGTCGCCCTC  |
| 7981 GAACCGGCGG ATGCTTCGCC CTCGATCAGG TTGCGGTAGC GCATGACTAG GATCGGGCCA  | 9541 GGGTTCTGAT TCAAGAACGG TTGTGCCGGC GCGGCGAGTG CCTGGGTAGC TCACGCGCTG  |
| 8041 GCCTGCCCCG CCTCTCCTT CAAATCGTAC TCCGGCAGGT CATTTGACCC GATCAGCTTG   | 9601 CGTGATACGG GACTCAAGAA TGGGCAGCTC GTACCCGGCC AGCGCCTCGG CAACCTCACC  |
| 8101 CGCACGGTGA AACAGAACTT CTTGAACCTC CCGGCGCTGC CACTGCGTTC GTAGATCGTC  | 9661 GCCGATGCGC GTGCCCTTGA TCGCCCGCGA CACGACAAAG GCCGCTTGTA GCCTTCCATC  |
| 8161 TTGAACAACC ATCTGGCTTC TGCCTTGCTT GCGGCGCGGC GTGCCAGGCG GTAGAGAAAA  | 9721 CGTGACCTCA ATGCGCTGCT TAACCAGCTC CACCAGGTCG GCGGTGGCCC ATATGTCGTA  |
| 8221 CGGCCGATGC CGGGATCGAT CAAAAAGTAA TCGGGGTGAA CCGTCAGCAC GTCCGGGTTC  | 9781 AGGGCTTGCC TGCACCGGAA TCAGCACGAA GTCGCTGCC TTGATCGCGG ACACAGCCAA   |
| 8281 TTGCCCTCTG TGATCTCGCG GTACATCCAA TCAGCTAGCT CGATCTCGAT GTACTCCGGC  | 9841 GTCCCGCGCC TGGGGCGCTC CGTCGATCAC TACGAAGTCG CGCCGGCCGA TGGCCTTCAC  |
| 8341 CGCCCGGTTT CGCTCTTTAC GATCTTGTAG CGGCTAATCA AGGCTTCACC CTCGGATACC  | 9901 GTCGCGGTCA ATCGTCGGGC GGTGATGCC GACAACGGTT AGCGGTTGAT CTTCCCGCAC   |
| 8401 GTCACCAGGC GGCCGTTCTT GGCCTTCTTC GTACGCTGCA TGGCAACGTG CGTGGTGTTC  | 9961 GGCCGCCCAA TCGCGGGCAC TGCCCTGGGG ATCGGAATCG ACTAACAGAA CATCGGCCCC  |
| 8461 AACCGAATGC AGGTTTCTAC CAGGTCGTCT TTCTGTCTTC CGCCATCGGC TCGCCGGCAG  | 10021 GGCGAGTTGC AGGGCGCGGG CTAGATGGGT TGCGATGGTC GTCTTGCTTG ACCCGCCTTT |
| 8521 AACTTGAGTA CGTCCGCAAC GTGTGGACGG AACACGCGGC CGGGCTTGTC TCCCTTCCCT  | 10081 CTGGTTAAGT ACAGCGATAA CCTTCATGCG TTCCCTTTCG GTATTGTTT ATTTACTCAT  |
| 8581 TCCCGGTATC GGTTTCATGA TTCGGTTAGA TGGGAAACCG CCATCAGTAC CAGGTCGTAA  | 10141 CGCATCATAT ACGCAGCGAC CGCATGACGC AAGCTGTTTT ACTCAAATAC ACATCACCTT |
| 8641 TCCACACAC TGGCCATGCC GGCCGGCCCT GCGGAAACCT CTACGTGCCC GTCTGGAAGC   | 10201 TTTAGACGGC GCGCTCGGT TTCTTCAGCG GCCAAGCTGG CCGGCCAGGC CGCCAGCTTG  |

**Supplemental Figure S11.** F-SHMT08cΔ+N374A-CDS, insert size, vector, restriction enzymes, and sequenced positive clones used for cloning.

```

10261 GCATCAGACA AACCGGCCAG GATTTTCATGC AGCCGCACGG TTGAGACGTG CGCGGGCGGC
10321 TCGAACACGT ACCCGGCCGC GATCATCTCC GCCTCGATCT CTTCCGTAAT GAAAAACGGT
10381 TCGTCCTGGC CGTCCTGGTG CGGTTTCATG CTTGTTCTC TTGGCGTTCA TTCTCGGCGG
10441 CCGCCAGGGC GTCGGCCTCG GTCAATGCGT CCTCACGGAA GGCACCGCGC CGCCTGGCCT
10501 CGGTGGGCGT CACTTCCTCG CTGCGCTCAA GTGCGCGGTA CAGGGTCGAG CGATGCACGC
10561 CAAGCAGTGC AGCCGCCTCT TTCACGGTGC GGCCTTCCTG GTCGATCAGC TCGCGGGCGT
10621 GCGCGATCTG TGCCGGGGTG AGGGTAGGGC GGGGGCCAAA CTTACGCCT CGGGCCTTGG
10681 CGGCCTCGCG CCCGCTCCGG GTGCGGTCGA TGATTAGGGA ACGCTCGAAC TCGGCAATGC
10741 CGGCGAACAC GGTCAACACC ATGCGGCCGG CCGGCGTGGT GGTGTCGGCC CACGGCTCTG
10801 CCAGGCTACG CAGGCCCCGCG CCGGCCTCCT GGATGCGCTC GGCAATGTCC AGTAGGTCGC
10861 GGGTGCTGCG GGCCAGGCGG TCTAGCCTGG TCACTGTCAC AACGTCGCCA GGGCGTAGGT
10921 GGTCAAGCAT CCTGGCCAGC TCCGGGCGGT CGCGCCTGGT GCCGGTGATC TTCTCGGAAA
10981 ACAGCTTGGT GCAGCCGGCC GCGTGCAATT CGGCCCGTTG GTTGGTCAAG TCCTGGTCGT
11041 CGGTGCTGAC GCGGGCATAG CCCAGCAGGC CAGCGGCGGC GCTCTTGTTT ATGGCGTAAT
11101 GTCTCCGTT CTAGTCGCAA GTATTCTACT TTATGCGACT AAAACACGCG ACAAGAAAAC
11161 GCCAGGAAAA GGGCAGGGCG GCAGCCTGTC GCGTAACTTA GGAATTGTGC GACATGTCGT
11221 TTTCAGAAGA CGGCTGCACT GAACGTCAGA AGCCGACTGC ACTATAGCAG CGGAGGGGTT
11281 GGATCAAAGT ACT

```
